# Supplementary material for: Glucagon-Like Peptide 1 Receptor Agonists and 13 Obesity-Associated Cancers in Patients With Type 2 Diabetes
Source: PubMed Central journal article supplement (PMC11227080; doi:10.1001/jamanetworkopen.2024.21305), 2024-07-05
Supplement: jamanetwopen-e2421305-s001.pdf [file jamanetwopen-e2421305-s001.pdf]

## Supplemental Online Content

Wang L, Xu R, Kaelber DC, Berger NA. Glucagon-like peptide 1 receptor agonists and 13 obesity-associated cancers in patients with type 2 diabetes. *JAMA Netw Open*. 2024;7(7):e2421305. doi:10.1001/jamanetworkopen.2024.21305

### **eAppendix.** Database

**eTable 1.** Clinical diagnosis, and other codes used in the platform that are used to determine the status of variables for study population definitions, exposures, outcomes, and those for propensity-score matching for groups

**eTable 2.** Characteristics of the GLP-1RA/no insulin group and insulin/no GLP-1RA group before and after matched for baseline covariates related to esophageal cancer for the study populations of patients with T2D and no history of any OAC

**eTable 3.** Characteristics of the GLP-1RA/no insulin group and insulin/no GLP-1RA group before and after matched for covariates related to breast cancer for the study populations of women (age 55 and older) with T2D and no history of any OAC

**eTable 4.** Characteristics of the GLP-1RA/no insulin group and insulin/no GLP-1RA group before and after matched for covariates related to endometrial cancer for the study populations of women with T2D and no history of any OAC

**eTable 5.** Characteristics of the GLP-1RA/no insulin group and insulin/no GLP-1RA group before and after matched for covariates related to gallbladder cancer for the study populations of patients with T2D and no history of any OAC

**eTable 6.** Characteristics of the GLP-1RA/no insulin group and insulin/no GLP-1RA group before and after matched for covariates related to stomach cancer for the study populations of patients with T2D and no history of any OAC

**eTable 7.** Characteristics of the GLP-1RA/no insulin group and insulin/no GLP-1RA group before and after matched for covariates related to kidney cancer for the study populations of patients with T2D and no history of any OAC

**eTable 8.** Characteristics of the GLP-1RA/no insulin group and insulin/no GLP-1RA group before and after matched for covariates related to liver cancer for the study populations of patients with T2D and no history of any OAC

**eTable 9.** Characteristics of the GLP-1RA/no insulin group and insulin/no GLP-1RA group before and after matched for covariates related to ovarian cancer for the study populations of women with T2D and no history of any OAC

**eTable 10.** Characteristics of the GLP-1RA/no insulin group and insulin/no GLP-1RA group before and after matched for covariates related to pancreatic cancer for the study populations of patients with T2D and no history of any OAC

**eTable 11.** Characteristics of the GLP-1RA/no insulin group and insulin/no GLP-1RA group before and after matched for covariates related to thyroid cancer for the study populations of patients with T2D and no history of any OAC

**eTable 12.** Characteristics of the GLP-1RA/no insulin group and insulin/no GLP-1RA group before and after matched for covariates related to meningioma for the study populations of patients with T2D and no history of any OAC

**eTable 13.** Characteristics of the GLP-1RA/no insulin group and insulin/no GLP-1RA group before and after matched for covariates related to multiple myeloma for the study populations of patients with T2D and no history of any OAC

**eTable 14.** Characteristics of the GLP-1RA/no metformin group and metformin/no GLP-1RA group before and after matched for covariates related to esophageal cancer for the study populations of patients with T2D and no history of any OAC

**eTable 15.** Characteristics of the GLP-1RA/no metformin group and metformin/no GLP-1RA group before and after matched for covariates related to breast cancer for the study populations of women (age 55 and older) with T2D and no history of any OAC

**eTable 16.** Characteristics of the GLP-1RA/no metformin group and metformin/no GLP-1RA group before and after matched for covariates related to colorectal cancer for the study populations of patients with T2D and no history of any OAC

**eTable 17.** Characteristics of the GLP-1RA/no metformin group and metformin/no GLP-1RA group before and after matched for covariates related to endometrial cancer for the study populations of women with T2D and no history of any OAC

**eTable 18.** Characteristics of the GLP-1RA/no metformin group and metformin/no GLP-1RA group before and after matched for covariates related to gallbladder cancer for the study populations of patients with T2D and no history of any OAC

**eTable 19.** Characteristics of the GLP-1RA/no metformin group and metformin/no GLP-1RA group before and after matched for covariates related to stomach cancer for the study populations of patients with T2D and no history of any OAC

**eTable 20.** Characteristics of the GLP-1RA/no metformin group and metformin/no GLP-1RA group before and after matched for covariates related to kidney cancer for the study populations of patients with T2D and no history of any OAC

**eTable 21.** Characteristics of the GLP-1RA/no metformin group and metformin/no GLP-1RA group before and after matched for covariates related to liver cancer for the study populations of patients with T2D and no history of any OAC

**eTable 22.** Characteristics of the GLP-1RA/no metformin group and metformin/no GLP-1RA group before and after matched for covariates related to ovarian cancer for the study populations of women with T2D and no history of any OAC

**eTable 23.** Characteristics of the GLP-1RA/no metformin group and metformin/no GLP-1RA group before and after matched for covariates related to pancreatic cancer for the study populations of patients with T2D and no history of any OAC

**eTable 24.** Characteristics of the GLP-1RA/no metformin group and metformin/no GLP-1RA group before and after matched for covariates related to thyroid cancer for the

study populations of patients with T2D and no history of any OAC

**eTable 25.** Characteristics of the GLP-1RA/no metformin group and metformin/no GLP-1RA group before and after matched for covariates related to meningioma for the study populations of patients with T2D and no history of any OAC

**eTable 26.** Characteristics of the GLP-1RA/no metformin group and metformin/no GLP-1RA group before and after matched for covariates related to multiple myeloma for the study populations of patients with T2D and no history of any OAC

This supplemental material has been provided by the authors to give readers additional information about their work.

## **eAppendix. Database**

The data used in this study were collected and analyzed on April 26, 2024 within the TriNetX Analytics platform based on the “Research US Collaborative Network”. We used the TriNetX platform to access aggregated and de-identified electronic health records (EHRs) of 113 million patients from 64 healthcare organizations in the US across 50 states, covering diverse geographic regions (22% Northeast, 16% Midwest, 39% South, 13% West, 10% Unspecified), age, race/ethnic, income and insurance groups and clinical setting. TriNetX, LLC is compliant with the Health Insurance Portability and Accountability Act (HIPAA). Any data displayed on the TriNetX Platform in aggregate form, or any patient level data provided in a data set generated by the TriNetX Platform only contains de-identified data as per the de-identification standard defined in Section §164.514(a) of the HIPAA Privacy Rule. TriNetX built-in analytic functions (e.g., incidence, prevalence, outcomes analysis, survival analysis, propensity score matching) allow for patient-level analyses, while only reporting population-level data. The MetroHealth System, Cleveland OH, IRB determined research in the way described here, is not Human Subject Research and therefore IRB is not required.

TriNetX is a platform that de-identifies and aggregates electronic health record (EHR) data from contributing healthcare systems, most of which are large academic medical institutions with both inpatient and outpatient facilities at multiple locations, across all 50 states in the US. TriNetX Analytics provides web-based and secure access to patient EHR data from hospitals, primary care, and specialty treatment providers, covering diverse geographic locations, age groups, racial and ethnic groups, income levels and insurance types including various commercial insurances, governmental insurance (Medicare and Medicaid), self-pay/uninsured, worker compensation insurance, military/VA insurance among others.

Self-reported sex (female, male), race and ethnicity data in TriNetX comes from the underlying clinical EHR systems of the contributing healthcare systems. TriNetX maps race and ethnicity data from the contributing healthcare systems to the following categories: (1) Race: Asian, American Indian or Alaskan Native, Black or African American, Native Hawaiian or Other, White, Unknown race; and (2) Ethnicity: Hispanic or Latino, Not Hispanic or Latino, Unknown Ethnicity.

TriNetX completes an intensive data preprocessing stage to minimize missing values. TriNetX maps the data to a consistent clinical data model with a consistent semantic meaning so that the data can be queried consistently regardless of the underlying data source. All covariates are either binary, categorical (which expands to a set of binary columns), or continuous but essentially guaranteed to exist. Age is guaranteed to exist. Missing sex values are represented using “Unknown Sex”. The missing data for race and ethnicity are presented as “Unknown race” or “Unknown Ethnicity”. For other variables including medical conditions, procedures, lab tests and socio-economic determinant health, the value is either present or absent so “missing” is not pertinent.

eTable 1. Clinical diagnosis, and other codes used in the platform that are used to determine the status of variables for study population definitions, exposures, outcomes, and those for propensity-score matching for groups

|                                                                                                 |                                                        |                                                                                                                                                                                                                                         |                |
|-------------------------------------------------------------------------------------------------|--------------------------------------------------------|-----------------------------------------------------------------------------------------------------------------------------------------------------------------------------------------------------------------------------------------|----------------|
| <b>Study population</b>                                                                         | T2D                                                    | Type 2 diabetes mellitus (International Classification of Diseases, Tenth Revision (ICD-10 or ICD-10 code: E11)                                                                                                                         | present/absent |
| <b>Exposure</b><br>(the first prescription of GLP-1RA, insulins or metformin in 4/2005-11/2018) | GLP-1RAs                                               | A10BJGlucagon-like peptide-1 (GLP-1) analogues (The Anatomical Therapeutic Chemical (ATC) code: A10BJ)                                                                                                                                  | present/absent |
|                                                                                                 | Insulins                                               | INSULINS AND ANALOGUES (ATC code: A10A)                                                                                                                                                                                                 | present/absent |
|                                                                                                 | Metformin                                              | Metformin (RxNorm code: 6809)                                                                                                                                                                                                           | present/absent |
| <b>Outcomes</b><br>(13 OACs)<br>(15-year follow-up following the exposure or index event)       | Esophageal cancer                                      | Malignant neoplasm of esophagus (ICD-10 code: C15)                                                                                                                                                                                      | present/absent |
|                                                                                                 | Breast cancer                                          | Malignant neoplasm of breast (ICD-10 code: C50)                                                                                                                                                                                         |                |
|                                                                                                 | Colorectal cancer                                      | <ul style="list-style-type: none"> <li>• Malignant neoplasm of colon (ICD-10 code: C18)</li> <li>• Malignant neoplasm of rectosigmoid junction (ICD-10 code: C19)</li> <li>• Malignant neoplasm of rectum (ICD-10 code: C20)</li> </ul> |                |
|                                                                                                 | Endometrial cancer                                     | Malignant neoplasm of endometrium (ICD-10 code: C54.1)                                                                                                                                                                                  |                |
|                                                                                                 | Gallbladder cancer                                     | Malignant neoplasm of gallbladder (ICD-10 code: C23)                                                                                                                                                                                    |                |
|                                                                                                 | Stomach cancer                                         | Malignant neoplasm of stomach (ICD-10 code: C16)                                                                                                                                                                                        |                |
|                                                                                                 | Kidney cancer                                          | Malignant neoplasm of kidney, except renal pelvis (ICD-10 code: C64)                                                                                                                                                                    |                |
|                                                                                                 | Ovarian cancer                                         | Malignant neoplasm of ovary (ICD-10 code: C56)                                                                                                                                                                                          |                |
|                                                                                                 | Pancreatic cancer                                      | Malignant neoplasm of pancreas (ICD-10 code: C25)                                                                                                                                                                                       |                |
| Thyroid cancer                                                                                  | Malignant neoplasm of thyroid gland (ICD-10 code: C73) |                                                                                                                                                                                                                                         |                |

|                                                                                                        |                                                      |                                                                                                                                                                                                                                                                                                                                                                                 |                   |
|--------------------------------------------------------------------------------------------------------|------------------------------------------------------|---------------------------------------------------------------------------------------------------------------------------------------------------------------------------------------------------------------------------------------------------------------------------------------------------------------------------------------------------------------------------------|-------------------|
|                                                                                                        | Hepatocellular carcinoma                             | Liver cell carcinoma (ICD-10 code: C22.0)                                                                                                                                                                                                                                                                                                                                       |                   |
|                                                                                                        | Meningioma                                           | Malignant neoplasm of meninges (ICD-10 code: C70)                                                                                                                                                                                                                                                                                                                               |                   |
|                                                                                                        | Multiple myeloma                                     | Multiple myeloma (ICD-10 code: C90.0)                                                                                                                                                                                                                                                                                                                                           |                   |
| <b>Demographics</b><br><br><b>(variables to be propensity-score matched)</b>                           | Age at the index event                               | Age                                                                                                                                                                                                                                                                                                                                                                             | continuous        |
|                                                                                                        | Female                                               | F                                                                                                                                                                                                                                                                                                                                                                               | present/absent    |
|                                                                                                        | Male                                                 | M                                                                                                                                                                                                                                                                                                                                                                               | present/absent    |
|                                                                                                        | Asian                                                | Asian (Demographics: 2028-9)                                                                                                                                                                                                                                                                                                                                                    | present/absent    |
|                                                                                                        | American Indian or Alaska Native                     | American Indian or Alaska Native (Demographics: 1002--5)                                                                                                                                                                                                                                                                                                                        | Ik8ju76543e2w1aq` |
|                                                                                                        | Black or African American                            | Black or African American (Demographics: 2054-5)                                                                                                                                                                                                                                                                                                                                | present/absent    |
|                                                                                                        | Native Hawaiian or Other Pacific Islander            | Native Hawaiian or Other Pacific Islander (Demographics: 2076-8)                                                                                                                                                                                                                                                                                                                |                   |
|                                                                                                        | White                                                | White (Demographics: 2106-3)                                                                                                                                                                                                                                                                                                                                                    | present/absent    |
|                                                                                                        | Hispanic/Latino                                      | Hispanic or Latino (Demographics: 2135-2)                                                                                                                                                                                                                                                                                                                                       | present/absent    |
|                                                                                                        | Not Hispanic or Latino                               | Not Hispanic or Latino (Demographics: 2186-5)                                                                                                                                                                                                                                                                                                                                   | present/absent    |
|                                                                                                        | Unknown race                                         | Unknown Race (Demographics: 2131-1)                                                                                                                                                                                                                                                                                                                                             | present/absent    |
|                                                                                                        | Unknown ethnicity                                    | Unknown Ethnicity (Demographics: UN)                                                                                                                                                                                                                                                                                                                                            | present/absent    |
| <b>Adverse socioeconomic determinants of health, lifestyle factors, medical conditions, medication</b> | Adverse socioeconomic and psychosocial circumstances | <p>Persons with potential health hazards related to socioeconomic and psychosocial circumstances (ICD-10 code: Z55-Z65)</p> <ul style="list-style-type: none"> <li>• Problems related to education and literacy (ICD-10 code: Z55)</li> <li>• Problems related to employment and unemployment (ICD-10 code: Z56)</li> <li>• Problems related to housing and economic</li> </ul> | present/absent    |

|                                                                        |                                                     |                                                                                                                                                                                                                                                                                                                                                                                                                                                                                                         |                       |
|------------------------------------------------------------------------|-----------------------------------------------------|---------------------------------------------------------------------------------------------------------------------------------------------------------------------------------------------------------------------------------------------------------------------------------------------------------------------------------------------------------------------------------------------------------------------------------------------------------------------------------------------------------|-----------------------|
| <p><b>prescriptions, (anytime to 1 day before the index event)</b></p> |                                                     | <p>circumstances (ICD-10 code: Z59)</p> <ul style="list-style-type: none"> <li>• Problems related to social environment (ICD-10 code: Z60)</li> <li>• Problems related to upbringing (ICD-10 code: Z62)</li> <li>• Other problems related to primary support group, including family circumstances (ICD-10 code: Z63)</li> <li>• Problems related to certain psychosocial circumstances ICD-10 code: Z64)</li> <li>• Problems related to other psychosocial circumstances (ICD-10 code: Z65)</li> </ul> |                       |
|                                                                        | <p>Family history of cancer</p>                     | <p>Family history of primary malignant neoplasm (ICD-10 code: Z80)</p>                                                                                                                                                                                                                                                                                                                                                                                                                                  | <p>present/absent</p> |
|                                                                        | <p>Family history of cancer of digestive organs</p> | <p>Family history of malignant neoplasm of digestive organs (ICD-10 code: Z80.0)</p>                                                                                                                                                                                                                                                                                                                                                                                                                    |                       |
|                                                                        | <p>Family history of colonic polyps</p>             | <p>Family history of colonic polyps (ICD-10 code: Z83.71)</p>                                                                                                                                                                                                                                                                                                                                                                                                                                           |                       |
|                                                                        | <p>Genetic susceptibility to cancer</p>             | <p>Genetic susceptibility to malignant neoplasm (ICD-10 code: Z15.0)</p>                                                                                                                                                                                                                                                                                                                                                                                                                                | <p>present/absent</p> |
|                                                                        | <p>Personal history of cancer</p>                   | <p>Personal history of malignant neoplasm (ICD-10 code: Z85)</p>                                                                                                                                                                                                                                                                                                                                                                                                                                        | <p>present/absent</p> |
|                                                                        | <p>Obesity/overweight</p>                           | <p>Overweight and obesity (ICD-10 code: E66)</p> <p>Body mass index [BMI] 40 or greater, adult (ICD-10 code: Z68.4)</p> <p>Body mass index [BMI] 30-39, adult (ICD-10 code: Z68.3)</p>                                                                                                                                                                                                                                                                                                                  | <p>present/absent</p> |

|                                                 |                                                                                                                                                                                                                                                                                                                                                     |                |
|-------------------------------------------------|-----------------------------------------------------------------------------------------------------------------------------------------------------------------------------------------------------------------------------------------------------------------------------------------------------------------------------------------------------|----------------|
|                                                 | <p>Body mass index [BMI] 25.0-25.9, adult (ICD-10 code: Z68.25)</p> <p>Body mass index [BMI] 26.0-26.9, adult (ICD-10 code: Z68.26)</p> <p>Body mass index [BMI] 27.0-27.9, adult (ICD-10 code: Z68.27)</p> <p>Body mass index [BMI] 28.0-28.9, adult (ICD-10 code: Z68.28)</p> <p>Body mass index [BMI] 29.0-29.9, adult (ICD-10 code: Z68.29)</p> |                |
| Alcohol related disorders                       | Alcohol related disorders (ICD-10 code: F10)                                                                                                                                                                                                                                                                                                        | present/absent |
| Nicotine dependence                             | Nicotine dependence (ICD-10 code: F17)                                                                                                                                                                                                                                                                                                              | present/absent |
| Crohn's disease                                 | Crohn's disease [regional enteritis] (ICD-10 code: K50)                                                                                                                                                                                                                                                                                             | present/absent |
| Ulcerative colitis                              | Ulcerative colitis (ICD-10 code: K51)                                                                                                                                                                                                                                                                                                               | present/absent |
| Cystic fibrosis                                 | Cystic fibrosis (ICD-10 code: E84 )                                                                                                                                                                                                                                                                                                                 | present/absent |
| Colon polyps                                    | Polyp of colon (ICD-10 code: K63.5)                                                                                                                                                                                                                                                                                                                 | present/absent |
| Benign neoplasm of colon and rectum             | Benign neoplasm of colon, rectum, anus and anal canal (ICD-10 code: D12)                                                                                                                                                                                                                                                                            |                |
| Bariatric surgery                               | Bariatric surgery status (ICD-10 code: Z98.84)                                                                                                                                                                                                                                                                                                      | present/absent |
| Encounter for screening for malignant neoplasms | Encounter for screening for malignant neoplasms (ICD-10 code: Z12)                                                                                                                                                                                                                                                                                  | present/absent |
| Colonoscopy                                     | Colonoscopy (The Current Procedural Terminology (CPT) code: 1022231)                                                                                                                                                                                                                                                                                |                |
| DPP-4 inhibitors                                | Dipeptidyl peptidase 4 (DPP-4) inhibitors (ATC code: A10BH)                                                                                                                                                                                                                                                                                         | present/absent |



|  |                                    |                                                                      |                |
|--|------------------------------------|----------------------------------------------------------------------|----------------|
|  | SGLT2 inhibitors                   | Sodium-glucose co-transporter 2 (SGLT2) inhibitors (ATC code: A10BK) | present/absent |
|  | Sulfonylureas                      | Sulfonylureas (ATC code: A10BB)                                      | present/absent |
|  | Thiazolidinediones                 | Thiazolidinediones (ATC code: A10BG)                                 | present/absent |
|  | Alpha glucosidase inhibitors       | Alpha glucosidase inhibitors (ATC code: A10BF)                       | present/absent |
|  | Other blood glucose lowering drugs | Other blood glucose lowering drugs, excl. insulins (ATC code: A10BJ) | present/absent |

**eTable 2.** Characteristics of the GLP-1RA/no insulin group and insulin/no GLP-1RA group before and after matched for baseline covariates related to esophageal cancer for the study populations of patients with T2D and no history of any OAC

**Group 1 (N = 48,983) and group 2 (N = 1,044,745) characteristics before propensity score matching**

**Demographics**

| Group  |                                                  | Mean ± SD                      | Patients            | % of Group     | P-Value    | SMD   |
|--------|--------------------------------------------------|--------------------------------|---------------------|----------------|------------|-------|
| 1<br>2 | AI Age at Index                                  | 55.9 +/- 11.7<br>61.8 +/- 15.9 | 48,983<br>1,044,745 | 100%<br>100%   | <0.00<br>1 | 0.420 |
| 1<br>2 | 2106-3 White                                     |                                | 32,592<br>633,989   | 66.5%<br>60.7% | <0.00<br>1 | 0.122 |
| 1<br>2 | 1002-5 American Indian or Alaska Native          |                                | 199<br>3,443        | 0.4%<br>0.3%   | 0.004      | 0.013 |
| 1<br>2 | UNK Unknown Race                                 |                                | 7,099<br>142,470    | 14.5%<br>13.6% | <0.00<br>1 | 0.025 |
| 1<br>2 | F Female                                         |                                | 26,011<br>476,110   | 53.1%<br>45.6% | <0.00<br>1 | 0.151 |
| 1<br>2 | 2076-8 Native Hawaiian or Other Pacific Islander |                                | 205<br>10,677       | 0.4%<br>1.0%   | <0.00<br>1 | 0.071 |
| 1<br>2 | UN Unknown Gender                                |                                | 2,252<br>27,321     | 4.6%<br>2.6%   | <0.00<br>1 | 0.106 |
| 1<br>2 | 2186-5 Not Hispanic or Latino                    |                                | 33,188<br>659,375   | 67.8%<br>63.1% | <0.00<br>1 | 0.098 |
| 1<br>2 | 2135-2 Hispanic or Latino                        |                                | 4,151<br>94,136     | 8.5%<br>9.0%   | <0.00<br>1 | 0.019 |
| 1<br>2 | 2054-5 Black or African American                 |                                | 6,265<br>178,267    | 12.8%<br>17.1% | <0.00<br>1 | 0.120 |
| 1<br>2 | M Male                                           |                                | 20,720<br>541,314   | 42.3%<br>51.8% | <0.00<br>1 | 0.191 |
| 1<br>2 | 2028-9 Asian                                     |                                | 1,204<br>41,822     | 2.5%<br>4.0%   | <0.00<br>1 | 0.087 |

**Diagnosis**

| Group  |                                                                             | Mean ± SD | Patients      | % of Group   | P-Value    | SMD   |
|--------|-----------------------------------------------------------------------------|-----------|---------------|--------------|------------|-------|
| 1<br>2 | Z55- Z65 Persons with potential health hazards related to socioeconomic and |           | 686<br>12,021 | 1.4%<br>1.2% | <0.00<br>1 | 0.022 |

|   |        | psychosocial<br>circumstances                         |         |       |       |        |
|---|--------|-------------------------------------------------------|---------|-------|-------|--------|
| 1 | E66    | Overweight and<br>obesity                             | 18,401  | 37.6% | <0.00 | 0.504  |
| 2 |        |                                                       | 166,445 | 15.9% | 1     |        |
| 1 | Z68.3  | Body mass index<br>[BMI] 30-39, adult                 | 4,204   | 8.6%  | <0.00 | 0.183  |
| 2 |        |                                                       | 43,128  | 4.1%  | 1     |        |
| 1 | Z68.4  | Body mass index<br>[BMI] 40 or greater,<br>adult      | 3,886   | 7.9%  | <0.00 | 0.208  |
| 2 |        |                                                       | 33,396  | 3.2%  | 1     |        |
| 1 | Z68.25 | Body mass index<br>[BMI] 25.0-25.9,<br>adult          | 157     | 0.3%  | 0.563 | 0.003  |
| 2 |        |                                                       | 3,510   | 0.3%  |       |        |
| 1 | Z68.26 | Body mass index<br>[BMI] 26.0-26.9,<br>adult          | 171     | 0.3%  | 0.957 | <0.001 |
| 2 |        |                                                       | 3,632   | 0.3%  |       |        |
| 1 | Z68.27 | Body mass index<br>[BMI] 27.0-27.9,<br>adult          | 288     | 0.6%  | <0.00 | 0.026  |
| 2 |        |                                                       | 4,209   | 0.4%  | 1     |        |
| 1 | Z68.28 | Body mass index<br>[BMI] 28.0-28.9,<br>adult          | 344     | 0.7%  | <0.00 | 0.036  |
| 2 |        |                                                       | 4,508   | 0.4%  | 1     |        |
| 1 | Z68.29 | Body mass index<br>[BMI] 29.0-29.9,<br>adult          | 398     | 0.8%  | <0.00 | 0.044  |
| 2 |        |                                                       | 4,843   | 0.5%  | 1     |        |
| 1 | F10    | Alcohol related<br>disorders                          | 563     | 1.1%  | <0.00 | 0.115  |
| 2 |        |                                                       | 28,538  | 2.7%  | 1     |        |
| 1 | Z80    | Family history of<br>primary malignant<br>neoplasm    | 2,042   | 4.2%  | <0.00 | 0.136  |
| 2 |        |                                                       | 19,398  | 1.9%  | 1     |        |
| 1 | Z15.0  | Genetic<br>susceptibility to<br>malignant neoplasm    | 24      | 0.0%  | <0.00 | 0.019  |
| 2 |        |                                                       | 156     | 0.0%  | 1     |        |
| 1 | Z12    | Encounter for<br>screening for<br>malignant neoplasms | 12,272  | 25.1% | <0.00 | 0.402  |
| 2 |        |                                                       | 105,217 | 10.1% | 1     |        |
| 1 | Z85    | Personal history of<br>malignant neoplasm             | 1,239   | 2.5%  | <0.00 | 0.066  |
| 2 |        |                                                       | 38,294  | 3.7%  | 1     |        |
| 1 | Z98.84 | Bariatric surgery<br>status                           | 632     | 1.3%  | <0.00 | 0.085  |
| 2 |        |                                                       | 5,136   | 0.5%  | 1     |        |
| 1 | F17    | Nicotine dependence                                   | 3,593   | 7.3%  | <0.00 | 0.070  |
| 2 |        |                                                       | 96,860  | 9.3%  | 1     |        |

|   |        |                                                                                   |         |       |       |       |
|---|--------|-----------------------------------------------------------------------------------|---------|-------|-------|-------|
| 1 | E66.0  | Obesity due to excess calories                                                    | 9,157   | 18.7% | <0.00 | 0.366 |
| 2 |        |                                                                                   | 69,998  | 6.7%  | 1     |       |
| 1 | E66.2  | Morbid (severe) obesity with alveolar hypoventilation                             | 150     | 0.3%  | 0.118 | 0.007 |
| 2 |        |                                                                                   | 3,643   | 0.3%  |       |       |
| 1 | E66.3  | Overweight                                                                        | 1,010   | 2.1%  | <0.00 | 0.122 |
| 2 |        |                                                                                   | 6,796   | 0.7%  |       |       |
| 1 | E66.8  | Other obesity                                                                     | 235     | 0.5%  | <0.00 | 0.065 |
| 2 |        |                                                                                   | 1,298   | 0.1%  |       |       |
| 1 | E66.9  | Obesity, unspecified                                                              | 13,805  | 28.2% | <0.00 | 0.433 |
| 2 |        |                                                                                   | 118,555 | 11.3% |       |       |
| 1 | Z72.0  | Tobacco use                                                                       | 1,064   | 2.2%  | <0.00 | 0.064 |
| 2 |        |                                                                                   | 13,876  | 1.3%  |       |       |
| 1 | K21    | Gastro-esophageal reflux disease                                                  | 9,681   | 19.8% | <0.00 | 0.146 |
| 2 |        |                                                                                   | 149,344 | 14.3% |       |       |
| 1 | K22.7  | Barrett's esophagus                                                               | 399     | 0.8%  | <0.00 | 0.042 |
| 2 |        |                                                                                   | 4,995   | 0.5%  |       |       |
| 1 | K22.0  | Achalasia of cardia                                                               | 32      | 0.1%  | 0.446 | 0.004 |
| 2 |        |                                                                                   | 783     | 0.1%  |       |       |
| 1 | D69.4  | Evans syndrome                                                                    | 0       | 0%    | 0.214 | 0.008 |
| 2 |        |                                                                                   | 1       | 33    |       |       |
| 1 | D50.1  | Sideropenic dysphagia                                                             | 86      | 0.2%  | <0.00 | 0.021 |
| 2 |        |                                                                                   | 1,038   | 0.1%  |       |       |
| 1 | S27.81 | Injury of esophagus (thoracic part)                                               | 0       | 0%    | 0.108 | 0.010 |
| 2 |        |                                                                                   | 55      | 0.0%  |       |       |
| 1 | C34    | Malignant neoplasm of bronchus and lung                                           | 67      | 0.1%  | <0.00 | 0.113 |
| 2 |        |                                                                                   | 10,154  | 1.0%  |       |       |
| 1 | C06    | Malignant neoplasm of other and unspecified parts of mouth                        | 10      | 0.0%  | <0.00 | 0.034 |
| 2 |        |                                                                                   | 1,096   | 0.1%  |       |       |
| 1 | C32    | Malignant neoplasm of larynx                                                      | 10      | 0.0%  | <0.00 | 0.041 |
| 2 |        |                                                                                   | 1,426   | 0.1%  |       |       |
| 1 | B97.7  | Papillomavirus as the cause of diseases classified elsewhere                      | 114     | 0.2%  | <0.00 | 0.037 |
| 2 |        |                                                                                   | 900     | 0.1%  |       |       |
| 1 | R87.8  | High risk human papillomavirus (HPV) DNA test positive from female genital organs | 158     | 0.3%  | <0.00 | 0.054 |
| 2 |        |                                                                                   | 1       | 830   |       |       |

|   |       |                                                          |       |      |       |       |
|---|-------|----------------------------------------------------------|-------|------|-------|-------|
| 1 | Z80.0 | Family history of malignant neoplasm of digestive organs | 784   | 1.6% | <0.00 | 0.089 |
| 2 |       |                                                          | 6,889 | 0.7% | 1     |       |
| 1 | D10   | Benign neoplasm of mouth and pharynx                     | 60    | 0.1% | 0.153 | 0.006 |
| 2 |       |                                                          | 1,059 | 0.1% |       |       |
| 1 | D13.0 | Benign neoplasm of esophagus                             | 11    | 0.0% | 0.816 | 0.001 |
| 2 |       |                                                          | 252   | 0.0% |       |       |

### Medication

| Group |      |                                                    | Mean ± SD | Patients | % of Group | P-Value | SMD   |
|-------|------|----------------------------------------------------|-----------|----------|------------|---------|-------|
| 1     | A10B | Biguanides                                         |           | 27,075   | 55.3%      | <0.00   | 0.806 |
| 2     | A    |                                                    |           | 199,802  | 19.1%      | 1       |       |
| 1     | A10B | Sulfonylureas                                      |           | 14,077   | 28.7%      | <0.00   | 0.424 |
| 2     | B    |                                                    |           | 125,703  | 12.0%      | 1       |       |
| 1     | A10B | Alpha glucosidase inhibitors                       |           | 229      | 0.5%       | <0.00   | 0.054 |
| 2     | F    |                                                    |           | 1,718    | 0.2%       | 1       |       |
| 1     | A10B | Thiazolidinediones                                 |           | 4,107    | 8.4%       | <0.00   | 0.213 |
| 2     | G    |                                                    |           | 35,435   | 3.4%       | 1       |       |
| 1     | A10B | Dipeptidyl peptidase 4 (DPP-4) inhibitors          |           | 9,485    | 19.4%      | <0.00   | 0.481 |
| 2     | H    |                                                    |           | 44,595   | 4.3%       | 1       |       |
| 1     | A10B | Sodium-glucose co-transporter 2 (SGLT2) inhibitors |           | 4,808    | 9.8%       | <0.00   | 0.423 |
| 2     | K    |                                                    |           | 6,447    | 0.6%       | 1       |       |
| 1     | A10B | Other blood glucose lowering drugs, excl. insulins |           | 614      | 1.3%       | <0.00   | 0.059 |
| 2     | X    |                                                    |           | 7,048    | 0.7%       | 1       |       |

### Group 1 (N = 48,437) and group 2 (N = 48,437) characteristics after propensity score matching

#### Demographics

| Group |        |                                  | Mean ± SD     | Patients | % of Group | P-Value | SMD    |
|-------|--------|----------------------------------|---------------|----------|------------|---------|--------|
| 1     | AI     | Age at Index                     | 55.9 +/- 11.7 | 48,437   | 100%       | <0.00   | 0.022  |
| 2     |        |                                  | 56.2 +/- 13.4 | 48,437   | 100%       | 1       |        |
| 1     | 2106-3 | White                            |               | 32,239   | 66.6%      | <0.00   | 0.041  |
| 2     |        |                                  |               | 33,166   | 68.5%      | 1       |        |
| 1     | 1002-5 | American Indian or Alaska Native |               | 196      | 0.4%       | 1       | <0.001 |
| 2     |        |                                  |               | 196      | 0.4%       |         |        |
| 1     | UNK    | Unknown Race                     |               | 6,973    | 14.4%      | 0.001   | 0.022  |
| 2     |        |                                  |               | 6,605    | 13.6%      |         |        |
| 1     | F      | Female                           |               | 25,706   | 53.1%      | 0.001   | 0.021  |
| 2     |        |                                  |               | 26,204   | 54.1%      |         |        |

|   |        |                                           |        |       |       |       |
|---|--------|-------------------------------------------|--------|-------|-------|-------|
| 1 | 2076-8 | Native Hawaiian or Other Pacific Islander | 204    | 0.4%  | 0.032 | 0.014 |
| 2 |        |                                           | 163    | 0.3%  |       |       |
| 1 | UN     | Unknown Gender                            | 2,163  | 4.5%  | 0.009 | 0.017 |
| 2 |        |                                           | 1,997  | 4.1%  |       |       |
| 1 | 2186-5 | Not Hispanic or Latino                    | 32,828 | 67.8% | 0.001 | 0.022 |
| 2 |        |                                           | 33,324 | 68.8% |       |       |
| 1 | 2135-2 | Hispanic or Latino                        | 4,113  | 8.5%  | 0.198 | 0.008 |
| 2 |        |                                           | 4,002  | 8.3%  |       |       |
| 1 | 2054-5 | Black or African American                 | 6,223  | 12.8% | 0.001 | 0.022 |
| 2 |        |                                           | 5,878  | 12.1% |       |       |
| 1 | M      | Male                                      | 20,568 | 42.5% | 0.031 | 0.014 |
| 2 |        |                                           | 20,236 | 41.8% |       |       |
| 1 | 2028-9 | Asian                                     | 1,195  | 2.5%  | 0.015 | 0.016 |
| 2 |        |                                           | 1,080  | 2.2%  |       |       |

### Diagnosis

| Group |        | Mean ± SD                                                                                     | Patients | % of Group | P-Value | SMD   |
|-------|--------|-----------------------------------------------------------------------------------------------|----------|------------|---------|-------|
| 1     | Z55-   | Persons with potential health hazards related to socioeconomic and psychosocial circumstances | 677      | 1.4%       | <0.001  | 0.024 |
| 2     | Z65    |                                                                                               | 546      | 1.1%       |         |       |
| 1     | E66    | Overweight and obesity                                                                        | 17,983   | 37.1%      | 0.806   | 0.002 |
| 2     |        |                                                                                               | 18,020   | 37.2%      |         |       |
| 1     | Z68.3  | Body mass index [BMI] 30-39, adult                                                            | 4,040    | 8.3%       | <0.001  | 0.026 |
| 2     |        |                                                                                               | 3,695    | 7.6%       |         |       |
| 1     | Z68.4  | Body mass index [BMI] 40 or greater, adult                                                    | 3,779    | 7.8%       | <0.001  | 0.025 |
| 2     |        |                                                                                               | 3,456    | 7.1%       |         |       |
| 1     | Z68.25 | Body mass index [BMI] 25.0-25.9, adult                                                        | 156      | 0.3%       | 0.293   | 0.007 |
| 2     |        |                                                                                               | 138      | 0.3%       |         |       |
| 1     | Z68.26 | Body mass index [BMI] 26.0-26.9, adult                                                        | 171      | 0.4%       | 0.160   | 0.009 |
| 2     |        |                                                                                               | 146      | 0.3%       |         |       |
| 1     | Z68.27 | Body mass index [BMI] 27.0-27.9, adult                                                        | 284      | 0.6%       | 0.001   | 0.021 |
| 2     |        |                                                                                               | 213      | 0.4%       |         |       |

|   |        |                                                       |        |       |        |       |
|---|--------|-------------------------------------------------------|--------|-------|--------|-------|
| 1 | Z68.28 | Body mass index [BMI] 28.0-28.9, adult                | 332    | 0.7%  | 0.043  | 0.013 |
| 2 |        |                                                       | 282    | 0.6%  |        |       |
| 1 | Z68.29 | Body mass index [BMI] 29.0-29.9, adult                | 382    | 0.8%  | 0.117  | 0.010 |
| 2 |        |                                                       | 340    | 0.7%  |        |       |
| 1 | F10    | Alcohol related disorders                             | 562    | 1.2%  | <0.001 | 0.024 |
| 2 |        |                                                       | 444    | 0.9%  |        |       |
| 1 | Z80    | Family history of primary malignant neoplasm          | 1,993  | 4.1%  | 0.001  | 0.021 |
| 2 |        |                                                       | 1,795  | 3.7%  |        |       |
| 1 | Z15.0  | Genetic susceptibility to malignant neoplasm          | 22     | 0.0%  | 0.034  | 0.014 |
| 2 |        |                                                       | 10     | 0.0%  |        |       |
| 1 | Z12    | Encounter for screening for malignant neoplasms       | 11,921 | 24.6% | 0.003  | 0.019 |
| 2 |        |                                                       | 11,527 | 23.8% |        |       |
| 1 | Z85    | Personal history of malignant neoplasm                | 1,229  | 2.5%  | 0.001  | 0.021 |
| 2 |        |                                                       | 1,075  | 2.2%  |        |       |
| 1 | Z98.84 | Bariatric surgery status                              | 614    | 1.3%  | 0.450  | 0.005 |
| 2 |        |                                                       | 588    | 1.2%  |        |       |
| 1 | F17    | Nicotine dependence                                   | 3,571  | 7.4%  | <0.001 | 0.035 |
| 2 |        |                                                       | 3,141  | 6.5%  |        |       |
| 1 | E66.0  | Obesity due to excess calories                        | 8,908  | 18.4% | 0.450  | 0.005 |
| 2 |        |                                                       | 8,817  | 18.2% |        |       |
| 1 | E66.2  | Morbid (severe) obesity with alveolar hypoventilation | 149    | 0.3%  | 0.281  | 0.007 |
| 2 |        |                                                       | 131    | 0.3%  |        |       |
| 1 | E66.3  | Overweight                                            | 980    | 2.0%  | 0.016  | 0.016 |
| 2 |        |                                                       | 877    | 1.8%  |        |       |
| 1 | E66.8  | Other obesity                                         | 219    | 0.5%  | 0.496  | 0.004 |
| 2 |        |                                                       | 205    | 0.4%  |        |       |
| 1 | E66.9  | Obesity, unspecified                                  | 13,461 | 27.8% | 0.280  | 0.007 |
| 2 |        |                                                       | 13,612 | 28.1% |        |       |
| 1 | Z72.0  | Tobacco use                                           | 1,040  | 2.1%  | 0.008  | 0.017 |
| 2 |        |                                                       | 924    | 1.9%  |        |       |
| 1 | K21    | Gastro-esophageal reflux disease                      | 9,520  | 19.7% | 0.006  | 0.018 |
| 2 |        |                                                       | 9,180  | 19.0% |        |       |
| 1 | K22.7  | Barrett's esophagus                                   | 390    | 0.8%  | 0.773  | 0.002 |
| 2 |        |                                                       | 382    | 0.8%  |        |       |
| 1 | K22.0  | Achalasia of cardia                                   | 31     | 0.1%  | 0.276  | 0.007 |
| 2 |        |                                                       | 23     | 0.0%  |        |       |

|   |        |                                                                                   |     |      |       |        |
|---|--------|-----------------------------------------------------------------------------------|-----|------|-------|--------|
| 1 | D69.4  | Evans syndrome                                                                    | 0   | 0%   | --    | --     |
| 2 | 1      |                                                                                   | 0   | 0%   |       |        |
| 1 | D50.1  | Sideropenic dysphagia                                                             | 83  | 0.2% | 0.814 | 0.002  |
| 2 |        |                                                                                   | 80  | 0.2% |       |        |
| 1 | S27.81 | Injury of esophagus (thoracic part)                                               | 0   | 0%   | 0.002 | 0.020  |
| 2 |        |                                                                                   | 10  | 0.0% |       |        |
| 1 | C34    | Malignant neoplasm of bronchus and lung                                           | 67  | 0.1% | 0.864 | 0.001  |
| 2 |        |                                                                                   | 69  | 0.1% |       |        |
| 1 | C06    | Malignant neoplasm of other and unspecified parts of mouth                        | 10  | 0.0% | 0.003 | 0.019  |
| 2 |        |                                                                                   | 28  | 0.1% |       |        |
| 1 | C32    | Malignant neoplasm of larynx                                                      | 10  | 0.0% | 0.317 | 0.006  |
| 2 |        |                                                                                   | 15  | 0.0% |       |        |
| 1 | B97.7  | Papillomavirus as the cause of diseases classified elsewhere                      | 114 | 0.2% | 0.687 | 0.003  |
| 2 |        |                                                                                   | 108 | 0.2% |       |        |
| 1 | R87.8  | High risk human papillomavirus (HPV) DNA test positive from female genital organs | 154 | 0.3% | 0.024 | 0.014  |
| 2 | 1      |                                                                                   | 117 | 0.2% |       |        |
| 1 | Z80.0  | Family history of malignant neoplasm of digestive organs                          | 764 | 1.6% | 0.003 | 0.019  |
| 2 |        |                                                                                   | 654 | 1.4% |       |        |
| 1 | D10    | Benign neoplasm of mouth and pharynx                                              | 59  | 0.1% | 1     | <0.001 |
| 2 |        |                                                                                   | 59  | 0.1% |       |        |
| 1 | D13.0  | Benign neoplasm of esophagus                                                      | 11  | 0.0% | 0.077 | 0.011  |
| 2 |        |                                                                                   | 21  | 0.0% |       |        |

### Medication

| Group  | Mean ± SD                                 | Patients | % of Group | P-Value | SMD    |
|--------|-------------------------------------------|----------|------------|---------|--------|
| 1 A10B |                                           | 26,535   | 54.8%      | 0.003   | 0.019  |
| 2 A    | Biguanides                                | 27,001   | 55.7%      |         |        |
| 1 A10B |                                           | 13,752   | 28.4%      | 0.001   | 0.022  |
| 2 B    | Sulfonylureas                             | 14,240   | 29.4%      |         |        |
| 1 A10B |                                           | 221      | 0.5%       | 0.260   | 0.007  |
| 2 F    | Alpha glucosidase inhibitors              | 198      | 0.4%       |         |        |
| 1 A10B |                                           | 4,019    | 8.3%       | 0.063   | 0.012  |
| 2 G    | Thiazolidinediones                        | 4,180    | 8.6%       |         |        |
| 1 A10B |                                           | 9,079    | 18.7%      | 0.954   | <0.001 |
| 2 H    | Dipeptidyl peptidase 4 (DPP-4) inhibitors | 9,086    | 18.8%      |         |        |



|   |      |                                                    |       |      |        |       |
|---|------|----------------------------------------------------|-------|------|--------|-------|
| 1 | A10B | Sodium-glucose co-transporter 2 (SGLT2) inhibitors | 4,290 | 8.9% | <0.001 | 0.034 |
| 2 | K    |                                                    | 3,835 | 7.9% |        |       |
| 1 | A10B | Other blood glucose lowering drugs, excl. insulins | 604   | 1.2% | 0.579  | 0.004 |
| 2 | X    |                                                    | 585   | 1.2% |        |       |

**eTable 3.** Characteristics of the GLP-1RA/no insulin group and insulin/no GLP-1RA group before and after matched for covariates related to breast cancer for the study populations of women (age 55 and older) with T2D and no history of any OAC

| <b>Group 1 (N = 13,865) and group 2 (N = 284,997) characteristics before propensity score matching</b> |             |                                                                                               |          |            |         |       |
|--------------------------------------------------------------------------------------------------------|-------------|-----------------------------------------------------------------------------------------------|----------|------------|---------|-------|
| <b>Demographics</b>                                                                                    |             |                                                                                               |          |            |         |       |
| Group                                                                                                  |             | Mean ± SD                                                                                     | Patients | % of Group | P-Value | SMD   |
| 1                                                                                                      | AI          | Age at Index                                                                                  | 13,865   | 100%       | <0.00   | 0.566 |
| 2                                                                                                      |             |                                                                                               | 284,997  | 100%       | 1       |       |
| 1                                                                                                      | 2106-3      | White                                                                                         | 9,776    | 70.5%      | <0.00   | 0.198 |
| 2                                                                                                      |             |                                                                                               | 174,355  | 61.2%      | 1       |       |
| 1                                                                                                      | 1002-5      | American Indian or Alaska Native                                                              | 50       | 0.4%       | 0.264   | 0.009 |
| 2                                                                                                      |             |                                                                                               | 874      | 0.3%       |         |       |
| 1                                                                                                      | UNK         | Unknown Race                                                                                  | 1,328    | 9.6%       | <0.00   | 0.043 |
| 2                                                                                                      |             |                                                                                               | 31,022   | 10.9%      | 1       |       |
| 1                                                                                                      | 2076-8      | Native Hawaiian or Other Pacific Islander                                                     | 48       | 0.3%       | <0.00   | 0.074 |
| 2                                                                                                      |             |                                                                                               | 2,664    | 0.9%       | 1       |       |
| 1                                                                                                      | UN          | Unknown Ethnicity                                                                             | 2,902    | 20.9%      | <0.00   | 0.133 |
| 2                                                                                                      |             |                                                                                               | 75,794   | 26.6%      | 1       |       |
| 1                                                                                                      | 2186-5      | Not Hispanic or Latino                                                                        | 9,979    | 72.0%      | <0.00   | 0.158 |
| 2                                                                                                      |             |                                                                                               | 184,217  | 64.6%      | 1       |       |
| 1                                                                                                      | 2135-2      | Hispanic or Latino                                                                            | 984      | 7.1%       | <0.00   | 0.062 |
| 2                                                                                                      |             |                                                                                               | 24,986   | 8.8%       | 1       |       |
| 1                                                                                                      | 2054-5      | Black or African American                                                                     | 2,027    | 14.6%      | <0.00   | 0.123 |
| 2                                                                                                      |             |                                                                                               | 54,813   | 19.2%      | 1       |       |
| 1                                                                                                      | 2028-9      | Asian                                                                                         | 279      | 2.0%       | <0.00   | 0.129 |
| 2                                                                                                      |             |                                                                                               | 12,141   | 4.3%       | 1       |       |
| <b>Diagnosis</b>                                                                                       |             |                                                                                               |          |            |         |       |
| Group                                                                                                  |             | Mean ± SD                                                                                     | Patients | % of Group | P-Value | SMD   |
| 1                                                                                                      | Z55-<br>Z65 | Persons with potential health hazards related to socioeconomic and psychosocial circumstances | 196      | 1.4%       | <0.00   | 0.044 |
| 2                                                                                                      |             |                                                                                               | 2,666    | 0.9%       | 1       |       |
| 1                                                                                                      | E66         | Overweight and obesity                                                                        | 4,915    | 35.4%      | <0.00   | 0.400 |
| 2                                                                                                      |             |                                                                                               | 51,523   | 18.1%      | 1       |       |

|   |        |                                                       |        |       |       |        |
|---|--------|-------------------------------------------------------|--------|-------|-------|--------|
| 1 | Z68.3  | Body mass index [BMI] 30-39, adult                    | 983    | 7.1%  | <0.00 | 0.128  |
| 2 |        |                                                       | 11,795 | 4.1%  | 1     |        |
| 1 | Z68.4  | Body mass index [BMI] 40 or greater, adult            | 857    | 6.2%  | <0.00 | 0.115  |
| 2 |        |                                                       | 10,539 | 3.7%  | 1     |        |
| 1 | Z68.25 | Body mass index [BMI] 25.0-25.9, adult                | 32     | 0.2%  | 0.965 | <0.001 |
| 2 |        |                                                       | 663    | 0.2%  |       |        |
| 1 | Z68.26 | Body mass index [BMI] 26.0-26.9, adult                | 39     | 0.3%  | 0.244 | 0.010  |
| 2 |        |                                                       | 662    | 0.2%  |       |        |
| 1 | Z68.27 | Body mass index [BMI] 27.0-27.9, adult                | 63     | 0.5%  | <0.00 | 0.029  |
| 2 |        |                                                       | 803    | 0.3%  | 1     |        |
| 1 | Z68.28 | Body mass index [BMI] 28.0-28.9, adult                | 72     | 0.5%  | <0.00 | 0.030  |
| 2 |        |                                                       | 920    | 0.3%  | 1     |        |
| 1 | Z68.29 | Body mass index [BMI] 29.0-29.9, adult                | 75     | 0.5%  | <0.00 | 0.029  |
| 2 |        |                                                       | 989    | 0.3%  | 1     |        |
| 1 | F10    | Alcohol related disorders                             | 84     | 0.6%  | <0.00 | 0.056  |
| 2 |        |                                                       | 3,218  | 1.1%  | 1     |        |
| 1 | Z80    | Family history of primary malignant neoplasm          | 791    | 5.7%  | <0.00 | 0.149  |
| 2 |        |                                                       | 7,754  | 2.7%  | 1     |        |
| 1 | Z15.0  | Genetic susceptibility to malignant neoplasm          | 10     | 0.1%  | <0.00 | 0.024  |
| 2 |        |                                                       | 60     | 0.0%  | 1     |        |
| 1 | Z12    | Encounter for screening for malignant neoplasms       | 4,506  | 32.5% | <0.00 | 0.404  |
| 2 |        |                                                       | 44,384 | 15.6% | 1     |        |
| 1 | Z85    | Personal history of malignant neoplasm                | 421    | 3.0%  | <0.00 | 0.035  |
| 2 |        |                                                       | 10,433 | 3.7%  | 1     |        |
| 1 | Z98.84 | Bariatric surgery status                              | 234    | 1.7%  | <0.00 | 0.089  |
| 2 |        |                                                       | 2,038  | 0.7%  | 1     |        |
| 1 | E66.0  | Obesity due to excess calories                        | 2,298  | 16.6% | <0.00 | 0.271  |
| 2 |        |                                                       | 22,234 | 7.8%  | 1     |        |
| 1 | E66.2  | Morbid (severe) obesity with alveolar hypoventilation | 40     | 0.3%  | 0.003 | 0.028  |
| 2 |        |                                                       | 1,313  | 0.5%  |       |        |
| 1 | E66.3  | Overweight                                            | 262    | 1.9%  | <0.00 | 0.111  |
| 2 |        |                                                       | 1,855  | 0.7%  | 1     |        |

|   |        |                                                                    |        |       |       |       |
|---|--------|--------------------------------------------------------------------|--------|-------|-------|-------|
| 1 | E66.8  | Other obesity                                                      | 64     | 0.5%  | <0.00 | 0.061 |
| 2 |        |                                                                    | 367    | 0.1%  | 1     |       |
| 1 | E66.9  | Obesity, unspecified                                               | 3,747  | 27.0% | <0.00 | 0.364 |
| 2 |        |                                                                    | 36,255 | 12.7% | 1     |       |
| 1 | O92.7  | Other and unspecified disorders of lactation                       | 0      | 0%    | 0.485 | 0.008 |
| 2 |        |                                                                    | 10     | 0.0%  |       |       |
| 1 | Z79.89 | Hormone replacement therapy                                        | 88     | 0.6%  | <0.00 | 0.038 |
| 2 | 0      |                                                                    | 1,050  | 0.4%  | 1     |       |
| 1 | Z92.23 | Personal history of estrogen therapy                               | 10     | 0.1%  | 0.058 | 0.014 |
| 2 |        |                                                                    | 111    | 0.0%  |       |       |
| 1 | Z98.82 | Breast implant status                                              | 10     | 0.1%  | 0.002 | 0.021 |
| 2 |        |                                                                    | 75     | 0.0%  |       |       |
| 1 | Z80.3  | Family history of malignant neoplasm of breast                     | 392    | 2.8%  | <0.00 | 0.116 |
| 2 |        |                                                                    | 3,435  | 1.2%  | 1     |       |
| 1 | R92    | Abnormal and inconclusive findings on diagnostic imaging of breast | 1,289  | 9.3%  | <0.00 | 0.210 |
| 2 |        |                                                                    | 11,640 | 4.1%  | 1     |       |
| 1 | D24    | Benign neoplasm of breast                                          | 113    | 0.8%  | <0.00 | 0.050 |
| 2 |        |                                                                    | 1,201  | 0.4%  | 1     |       |
| 1 | N60    | Benign mammary dysplasia                                           | 496    | 3.6%  | <0.00 | 0.133 |
| 2 |        |                                                                    | 4,263  | 1.5%  | 1     |       |
| 1 | N62    | Hypertrophy of breast                                              | 79     | 0.6%  | <0.00 | 0.063 |
| 2 |        |                                                                    | 529    | 0.2%  | 1     |       |
| 1 | N63    | Unspecified lump in breast                                         | 700    | 5.0%  | <0.00 | 0.132 |
| 2 |        |                                                                    | 7,212  | 2.5%  | 1     |       |
| 1 | N64    | Other disorders of breast                                          | 759    | 5.5%  | <0.00 | 0.151 |
| 2 |        |                                                                    | 7,195  | 2.5%  | 1     |       |
| 1 | N61    | Inflammatory disorders of breast                                   | 70     | 0.5%  | <0.00 | 0.037 |
| 2 |        |                                                                    | 781    | 0.3%  | 1     |       |
| 1 | D05    | Carcinoma in situ of breast                                        | 31     | 0.2%  | 0.005 | 0.021 |
| 2 |        |                                                                    | 381    | 0.1%  |       |       |

### Procedure

| Group | Mean ± SD | Patients | % of Group | P-Value | SMD   |
|-------|-----------|----------|------------|---------|-------|
| 1     |           | 0        | 0%         | 0.464   | 0.009 |
| 2     |           | 11       | 0.0%       |         |       |

|   |       |                                        |       |      |       |       |
|---|-------|----------------------------------------|-------|------|-------|-------|
| 1 | 58300 | Insertion of intrauterine device (IUD) | 18    | 0.1% | <0.00 | 0.039 |
| 2 |       |                                        | 66    | 0.0% | 1     |       |
| 1 | 1001  | Radiation                              | 28    | 0.2% | <0.00 | 0.057 |
| 2 |       |                                        | 1,571 | 0.6% | 1     |       |

### Medication

| Group |       | Mean ± SD                                          | Patients | % of Group | P-Value | SMD   |
|-------|-------|----------------------------------------------------|----------|------------|---------|-------|
| 1     | A10B  | Biguanides                                         | 7,389    | 53.3%      | <0.00   | 0.716 |
| 2     | A     |                                                    | 59,166   | 20.8%      | 1       |       |
| 1     | A10B  | Sulfonylureas                                      | 4,083    | 29.4%      | <0.00   | 0.429 |
| 2     | B     |                                                    | 35,332   | 12.4%      | 1       |       |
| 1     | A10B  | Alpha glucosidase inhibitors                       | 64       | 0.5%       | <0.00   | 0.052 |
| 2     | F     |                                                    | 488      | 0.2%       | 1       |       |
| 1     | A10B  | Thiazolidinediones                                 | 1,173    | 8.5%       | <0.00   | 0.211 |
| 2     | G     |                                                    | 9,921    | 3.5%       | 1       |       |
| 1     | A10B  | Dipeptidyl peptidase 4 (DPP-4) inhibitors          | 2,792    | 20.1%      | <0.00   | 0.471 |
| 2     | H     |                                                    | 14,092   | 4.9%       | 1       |       |
| 1     | A10B  | Sodium-glucose co-transporter 2 (SGLT2) inhibitors | 1,294    | 9.3%       | <0.00   | 0.409 |
| 2     | K     |                                                    | 1,768    | 0.6%       | 1       |       |
| 1     | A10B  | Other blood glucose lowering drugs, excl. insulins | 198      | 1.4%       | <0.00   | 0.070 |
| 2     | X     |                                                    | 2,014    | 0.7%       | 1       |       |
| 1     | HS200 | CONTRACEPTIVE S,SYSTEMIC                           | 143      | 1.0%       | <0.00   | 0.109 |
| 2     |       |                                                    | 535      | 0.2%       | 1       |       |

### Group 1 (N = 13,768) and group 2 (N = 13,768) characteristics after propensity score matching

#### Demographics

| Group |        | Mean ± SD                        | Patients     | % of Group | P-Value | SMD   |
|-------|--------|----------------------------------|--------------|------------|---------|-------|
| 1     | AI     | Age at Index                     | 63.6 +/- 6.2 | 100%       | 0.545   | 0.007 |
| 2     |        |                                  | 63.5 +/- 6.3 | 13,768     |         |       |
| 1     | 2106-3 | White                            | 9,696        | 70.4%      | 0.001   | 0.039 |
| 2     |        |                                  | 9,941        | 72.2%      |         |       |
| 1     | 1002-5 | American Indian or Alaska Native | 50           | 0.4%       | 0.840   | 0.002 |
| 2     |        |                                  | 48           | 0.3%       |         |       |
| 1     | UNK    | Unknown Race                     | 1,322        | 9.6%       | 0.068   | 0.022 |
| 2     |        |                                  | 1,234        | 9.0%       |         |       |

|   |        |                                           |        |       |       |       |
|---|--------|-------------------------------------------|--------|-------|-------|-------|
| 1 | 2076-8 | Native Hawaiian or Other Pacific Islander | 48     | 0.3%  | 0.190 | 0.016 |
| 2 |        |                                           | 36     | 0.3%  |       |       |
| 1 | UN     | Unknown Ethnicity                         | 2,889  | 21.0% | 0.689 | 0.005 |
| 2 |        |                                           | 2,862  | 20.8% |       |       |
| 1 | 2186-5 | Not Hispanic or Latino                    | 9,901  | 71.9% | 0.142 | 0.018 |
| 2 |        |                                           | 10,010 | 72.7% |       |       |
| 1 | 2135-2 | Hispanic or Latino                        | 978    | 7.1%  | 0.050 | 0.024 |
| 2 |        |                                           | 896    | 6.5%  |       |       |
| 1 | 2054-5 | Black or African American                 | 2,017  | 14.6% | 0.186 | 0.016 |
| 2 |        |                                           | 1,940  | 14.1% |       |       |
| 1 | 2028-9 | Asian                                     | 278    | 2.0%  | 0.068 | 0.022 |
| 2 |        |                                           | 237    | 1.7%  |       |       |

### Diagnosis

| Group |        |                                                                                               | Mean ± SD | Patients | % of Group | P-Value | SMD   |
|-------|--------|-----------------------------------------------------------------------------------------------|-----------|----------|------------|---------|-------|
| 1     | Z55-   | Persons with potential health hazards related to socioeconomic and psychosocial circumstances |           | 193      | 1.4%       | 0.151   | 0.017 |
| 2     | Z65    |                                                                                               |           | 166      | 1.2%       |         |       |
| 1     | E66    | Overweight and obesity                                                                        |           | 4,850    | 35.2%      | 0.350   | 0.011 |
| 2     |        |                                                                                               |           | 4,776    | 34.7%      |         |       |
| 1     | Z68.3  | Body mass index [BMI] 30-39, adult                                                            |           | 966      | 7.0%       | 0.007   | 0.032 |
| 2     |        |                                                                                               |           | 855      | 6.2%       |         |       |
| 1     | Z68.4  | Body mass index [BMI] 40 or greater, adult                                                    |           | 848      | 6.2%       | 0.025   | 0.027 |
| 2     |        |                                                                                               |           | 761      | 5.5%       |         |       |
| 1     | Z68.25 | Body mass index [BMI] 25.0-25.9, adult                                                        |           | 32       | 0.2%       | 0.068   | 0.022 |
| 2     |        |                                                                                               |           | 19       | 0.1%       |         |       |
| 1     | Z68.26 | Body mass index [BMI] 26.0-26.9, adult                                                        |           | 39       | 0.3%       | 0.909   | 0.001 |
| 2     |        |                                                                                               |           | 38       | 0.3%       |         |       |
| 1     | Z68.27 | Body mass index [BMI] 27.0-27.9, adult                                                        |           | 63       | 0.5%       | 0.583   | 0.007 |
| 2     |        |                                                                                               |           | 57       | 0.4%       |         |       |
| 1     | Z68.28 | Body mass index [BMI] 28.0-28.9, adult                                                        |           | 70       | 0.5%       | 0.933   | 0.001 |
| 2     |        |                                                                                               |           | 71       | 0.5%       |         |       |

|   |        |                                                       |       |       |       |        |
|---|--------|-------------------------------------------------------|-------|-------|-------|--------|
| 1 | Z68.29 | Body mass index [BMI] 29.0-29.9, adult                | 74    | 0.5%  | 0.868 | 0.002  |
| 2 |        |                                                       | 72    | 0.5%  |       |        |
| 1 | F10    | Alcohol related disorders                             | 83    | 0.6%  | 0.035 | 0.025  |
| 2 |        |                                                       | 58    | 0.4%  |       |        |
| 1 | Z80    | Family history of primary malignant neoplasm          | 777   | 5.6%  | 0.152 | 0.017  |
| 2 |        |                                                       | 723   | 5.3%  |       |        |
| 1 | Z15.0  | Genetic susceptibility to malignant neoplasm          | 10    | 0.1%  | 1     | <0.001 |
| 2 |        |                                                       | 10    | 0.1%  |       |        |
| 1 | Z12    | Encounter for screening for malignant neoplasms       | 4,437 | 32.2% | 0.060 | 0.023  |
| 2 |        |                                                       | 4,292 | 31.2% |       |        |
| 1 | Z85    | Personal history of malignant neoplasm                | 417   | 3.0%  | 0.184 | 0.016  |
| 2 |        |                                                       | 380   | 2.8%  |       |        |
| 1 | Z98.84 | Bariatric surgery status                              | 230   | 1.7%  | 0.191 | 0.016  |
| 2 |        |                                                       | 203   | 1.5%  |       |        |
| 1 | E66.0  | Obesity due to excess calories                        | 2,271 | 16.5% | 0.246 | 0.014  |
| 2 |        |                                                       | 2,200 | 16.0% |       |        |
| 1 | E66.2  | Morbid (severe) obesity with alveolar hypoventilation | 40    | 0.3%  | 1     | <0.001 |
| 2 |        |                                                       | 40    | 0.3%  |       |        |
| 1 | E66.3  | Overweight                                            | 258   | 1.9%  | 0.621 | 0.006  |
| 2 |        |                                                       | 247   | 1.8%  |       |        |
| 1 | E66.8  | Other obesity                                         | 63    | 0.5%  | 0.661 | 0.005  |
| 2 |        |                                                       | 68    | 0.5%  |       |        |
| 1 | E66.9  | Obesity, unspecified                                  | 3,692 | 26.8% | 0.714 | 0.004  |
| 2 |        |                                                       | 3,719 | 27.0% |       |        |
| 1 | O92.7  | Other and unspecified disorders of lactation          | 0     | 0%    | --    | --     |
| 2 |        |                                                       | 0     | 0%    |       |        |
| 1 | Z79.89 | Hormone replacement therapy                           | 88    | 0.6%  | 0.151 | 0.017  |
| 2 | 0      |                                                       | 70    | 0.5%  |       |        |
| 1 | Z92.23 | Personal history of estrogen therapy                  | 10    | 0.1%  | 1     | <0.001 |
| 2 |        |                                                       | 10    | 0.1%  |       |        |
| 1 | Z98.82 | Breast implant status                                 | 10    | 0.1%  | 1     | <0.001 |
| 2 |        |                                                       | 10    | 0.1%  |       |        |
| 1 | Z80.3  | Family history of malignant neoplasm of breast        | 385   | 2.8%  | 0.264 | 0.013  |
| 2 |        |                                                       | 355   | 2.6%  |       |        |

|   |     |                                                                    |       |      |       |       |
|---|-----|--------------------------------------------------------------------|-------|------|-------|-------|
| 1 | R92 | Abnormal and inconclusive findings on diagnostic imaging of breast | 1,274 | 9.3% | 0.091 | 0.020 |
| 2 |     |                                                                    | 1,194 | 8.7% |       |       |
| 1 | D24 | Benign neoplasm of breast                                          | 113   | 0.8% | 0.122 | 0.019 |
| 2 |     |                                                                    | 91    | 0.7% |       |       |
| 1 | N60 | Benign mammary dysplasia                                           | 491   | 3.6% | 0.153 | 0.017 |
| 2 |     |                                                                    | 448   | 3.3% |       |       |
| 1 | N62 | Hypertrophy of breast                                              | 78    | 0.6% | 0.407 | 0.010 |
| 2 |     |                                                                    | 68    | 0.5% |       |       |
| 1 | N63 | Unspecified lump in breast                                         | 686   | 5.0% | 0.299 | 0.013 |
| 2 |     |                                                                    | 649   | 4.7% |       |       |
| 1 | N64 | Other disorders of breast                                          | 747   | 5.4% | 0.098 | 0.020 |
| 2 |     |                                                                    | 686   | 5.0% |       |       |
| 1 | N61 | Inflammatory disorders of breast                                   | 68    | 0.5% | 0.864 | 0.002 |
| 2 |     |                                                                    | 70    | 0.5% |       |       |
| 1 | D05 | Carcinoma in situ of breast                                        | 31    | 0.2% | 0.599 | 0.006 |
| 2 |     |                                                                    | 27    | 0.2% |       |       |

#### Procedure

| Group | Mean ± SD | Patients                               | % of Group | P-Value | SMD   |        |
|-------|-----------|----------------------------------------|------------|---------|-------|--------|
| 1     | C1789     | Prosthesis, breast (implantable)       | 0          | 0%      | 0.002 | 0.038  |
| 2     |           |                                        | 10         | 0.1%    |       |        |
| 1     | 58300     | Insertion of intrauterine device (IUD) | 18         | 0.1%    | 1     | <0.001 |
| 2     |           |                                        | 18         | 0.1%    |       |        |
| 1     | 1001      | Radiation                              | 28         | 0.2%    | 0.680 | 0.005  |
| 2     |           |                                        | 25         | 0.2%    |       |        |

#### Medication

| Group | Mean ± SD | Patients                     | % of Group | P-Value | SMD   |       |
|-------|-----------|------------------------------|------------|---------|-------|-------|
| 1     | A10B      | Biguanides                   | 7,292      | 53.0%   | 0.530 | 0.008 |
| 2     |           |                              | A          | 7,344   |       |       |
| 1     | A10B      | Sulfonylureas                | 4,021      | 29.2%   | 0.094 | 0.020 |
| 2     |           |                              | B          | 4,148   |       |       |
| 1     | A10B      | Alpha glucosidase inhibitors | 64         | 0.5%    | 0.464 | 0.009 |
| 2     |           |                              | F          | 56      |       |       |
| 1     | A10B      | Thiazolidinediones           | 1,162      | 8.4%    | 0.635 | 0.006 |
| 2     |           |                              | G          | 1,184   |       |       |



|   |       |                                     |       |       |       |       |
|---|-------|-------------------------------------|-------|-------|-------|-------|
| 1 | A10B  | Dipeptidyl peptidase                | 2,714 | 19.7% |       |       |
| 2 | H     | 4 (DPP-4) inhibitors                | 2,789 | 20.3% | 0.258 | 0.014 |
| 1 | A10B  | Sodium-glucose co-                  | 1,197 | 8.7%  |       |       |
| 2 | K     | transporter 2<br>(SGLT2) inhibitors | 1,046 | 7.6%  | 0.001 | 0.040 |
| 1 | A10B  | Other blood glucose                 | 194   | 1.4%  |       |       |
| 2 | X     | lowering drugs, excl.<br>insulins   | 215   | 1.6%  | 0.295 | 0.013 |
| 1 | HS200 | CONTRACEPTIVE                       | 139   | 1.0%  |       |       |
| 2 |       | S,SYSTEMIC                          | 135   | 1.0%  | 0.808 | 0.003 |

**eTable 4.** Characteristics of the GLP-1RA/no insulin group and insulin/no GLP-1RA group before and after matched for covariates related to endometrial cancer for the study populations of women with T2D and no history of any OAC

| <b>Group 1 (N = 26,011) and group 2 (N = 476,110) characteristics before propensity score matching</b> |             |                                                                                               |          |            |         |       |
|--------------------------------------------------------------------------------------------------------|-------------|-----------------------------------------------------------------------------------------------|----------|------------|---------|-------|
| <b>Demographics</b>                                                                                    |             |                                                                                               |          |            |         |       |
| Group                                                                                                  |             | Mean ± SD                                                                                     | Patients | % of Group | P-Value | SMD   |
| 1                                                                                                      | AI          | Age at Index                                                                                  | 26,011   | 100%       | <0.00   | 0.469 |
| 2                                                                                                      |             |                                                                                               | 476,110  | 100%       | 1       |       |
| 1                                                                                                      | 2106-3      | White                                                                                         | 17,165   | 66.0%      | <0.00   | 0.138 |
| 2                                                                                                      |             |                                                                                               | 282,423  | 59.3%      | 1       |       |
| 1                                                                                                      | 1002-5      | American Indian or Alaska Native                                                              | 123      | 0.5%       | 0.003   | 0.018 |
| 2                                                                                                      |             |                                                                                               | 1,701    | 0.4%       |         |       |
| 1                                                                                                      | UNK         | Unknown Race                                                                                  | 2,772    | 10.7%      | <0.00   | 0.035 |
| 2                                                                                                      |             |                                                                                               | 55,979   | 11.8%      | 1       |       |
| 1                                                                                                      | 2076-8      | Native Hawaiian or Other Pacific Islander                                                     | 105      | 0.4%       | <0.00   | 0.075 |
| 2                                                                                                      |             |                                                                                               | 4,943    | 1.0%       | 1       |       |
| 1                                                                                                      | UN          | Unknown Ethnicity                                                                             | 5,078    | 19.5%      | <0.00   | 0.156 |
| 2                                                                                                      |             |                                                                                               | 124,092  | 26.1%      | 1       |       |
| 1                                                                                                      | 2186-5      | Not Hispanic or Latino                                                                        | 18,384   | 70.7%      | <0.00   | 0.142 |
| 2                                                                                                      |             |                                                                                               | 304,990  | 64.1%      | 1       |       |
| 1                                                                                                      | 2135-2      | Hispanic or Latino                                                                            | 2,549    | 9.8%       | 0.682   | 0.003 |
| 2                                                                                                      |             |                                                                                               | 47,028   | 9.9%       |         |       |
| 1                                                                                                      | 2054-5      | Black or African American                                                                     | 4,436    | 17.1%      | <0.00   | 0.077 |
| 2                                                                                                      |             |                                                                                               | 95,352   | 20.0%      | 1       |       |
| 1                                                                                                      | 2028-9      | Asian                                                                                         | 619      | 2.4%       | <0.00   | 0.098 |
| 2                                                                                                      |             |                                                                                               | 19,593   | 4.1%       | 1       |       |
| <b>Diagnosis</b>                                                                                       |             |                                                                                               |          |            |         |       |
| Group                                                                                                  |             | Mean ± SD                                                                                     | Patients | % of Group | P-Value | SMD   |
| 1                                                                                                      | Z55-<br>Z65 | Persons with potential health hazards related to socioeconomic and psychosocial circumstances | 468      | 1.8%       | <0.00   | 0.048 |
| 2                                                                                                      |             |                                                                                               | 5,762    | 1.2%       | 1       |       |
| 1                                                                                                      | E66         | Overweight and obesity                                                                        | 10,477   | 40.3%      | <0.00   | 0.493 |
| 2                                                                                                      |             |                                                                                               | 87,968   | 18.5%      | 1       |       |

|   |        |                                                       |        |       |       |       |
|---|--------|-------------------------------------------------------|--------|-------|-------|-------|
| 1 | Z68.3  | Body mass index [BMI] 30-39, adult                    | 1,815  | 7.0%  | <0.00 | 0.146 |
| 2 |        |                                                       | 17,667 | 3.7%  | 1     |       |
| 1 | Z68.4  | Body mass index [BMI] 40 or greater, adult            | 2,154  | 8.3%  | <0.00 | 0.183 |
| 2 |        |                                                       | 18,645 | 3.9%  | 1     |       |
| 1 | Z68.25 | Body mass index [BMI] 25.0-25.9, adult                | 56     | 0.2%  | 0.857 | 0.001 |
| 2 |        |                                                       | 1,000  | 0.2%  |       |       |
| 1 | Z68.26 | Body mass index [BMI] 26.0-26.9, adult                | 50     | 0.2%  | 0.747 | 0.002 |
| 2 |        |                                                       | 959    | 0.2%  |       |       |
| 1 | Z68.27 | Body mass index [BMI] 27.0-27.9, adult                | 87     | 0.3%  | 0.003 | 0.018 |
| 2 |        |                                                       | 1,140  | 0.2%  |       |       |
| 1 | Z68.28 | Body mass index [BMI] 28.0-28.9, adult                | 107    | 0.4%  | <0.00 | 0.025 |
| 2 |        |                                                       | 1,266  | 0.3%  | 1     |       |
| 1 | Z68.29 | Body mass index [BMI] 29.0-29.9, adult                | 119    | 0.5%  | <0.00 | 0.028 |
| 2 |        |                                                       | 1,376  | 0.3%  | 1     |       |
| 1 | Z80    | Family history of primary malignant neoplasm          | 1,430  | 5.5%  | <0.00 | 0.160 |
| 2 |        |                                                       | 11,367 | 2.4%  | 1     |       |
| 1 | Z15.0  | Genetic susceptibility to malignant neoplasm          | 18     | 0.1%  | <0.00 | 0.023 |
| 2 |        |                                                       | 100    | 0.0%  | 1     |       |
| 1 | Z12    | Encounter for screening for malignant neoplasms       | 7,877  | 30.3% | <0.00 | 0.410 |
| 2 |        |                                                       | 65,044 | 13.7% | 1     |       |
| 1 | Z85    | Personal history of malignant neoplasm                | 593    | 2.3%  | <0.00 | 0.052 |
| 2 |        |                                                       | 14,844 | 3.1%  | 1     |       |
| 1 | Z98.84 | Bariatric surgery status                              | 474    | 1.8%  | <0.00 | 0.099 |
| 2 |        |                                                       | 3,408  | 0.7%  | 1     |       |
| 1 | E66.0  | Obesity due to excess calories                        | 5,392  | 20.7% | <0.00 | 0.356 |
| 2 |        |                                                       | 39,813 | 8.4%  | 1     |       |
| 1 | E66.2  | Morbid (severe) obesity with alveolar hypoventilation | 82     | 0.3%  | 0.029 | 0.015 |
| 2 |        |                                                       | 1,919  | 0.4%  |       |       |
| 1 | E66.3  | Overweight                                            | 535    | 2.1%  | <0.00 | 0.120 |
| 2 |        |                                                       | 3,181  | 0.7%  | 1     |       |
| 1 | E66.8  | Other obesity                                         | 134    | 0.5%  | <0.00 | 0.064 |
| 2 |        |                                                       | 702    | 0.1%  | 1     |       |

|   |        |                                                              |        |       |       |       |
|---|--------|--------------------------------------------------------------|--------|-------|-------|-------|
| 1 | E66.9  | Obesity, unspecified                                         | 7,879  | 30.3% | <0.00 | 0.431 |
| 2 |        |                                                              | 61,596 | 12.9% | 1     |       |
| 1 | Z79.89 | Hormone replacement therapy                                  | 137    | 0.5%  | <0.00 | 0.037 |
| 2 | 0      |                                                              | 1,374  | 0.3%  | 1     |       |
| 1 | Z92.23 | Personal history of estrogen therapy                         | 10     | 0.0%  | 0.233 | 0.007 |
| 2 |        |                                                              | 124    | 0.0%  |       |       |
| 1 | E28.2  | Polycystic ovarian syndrome                                  | 979    | 3.8%  | <0.00 | 0.219 |
| 2 |        |                                                              | 2,780  | 0.6%  | 1     |       |
| 1 | Z80.41 | Family history of malignant neoplasm of ovary                | 104    | 0.4%  | <0.00 | 0.056 |
| 2 |        |                                                              | 554    | 0.1%  | 1     |       |
| 1 | Z80.49 | Family history of malignant neoplasm of other genital organs | 38     | 0.1%  | <0.00 | 0.025 |
| 2 |        |                                                              | 315    | 0.1%  | 1     |       |
| 1 | N85.0  | Endometrial hyperplasia                                      | 182    | 0.7%  | <0.00 | 0.053 |
| 2 |        |                                                              | 1,527  | 0.3%  | 1     |       |
| 1 | D25    | Leiomyoma of uterus                                          | 1,031  | 4.0%  | <0.00 | 0.130 |
| 2 |        |                                                              | 8,571  | 1.8%  | 1     |       |
| 1 | D26    | Other benign neoplasms of uterus                             | 45     | 0.2%  | <0.00 | 0.026 |
| 2 |        |                                                              | 377    | 0.1%  | 1     |       |
| 1 | D27    | Benign neoplasm of ovary                                     | 95     | 0.4%  | <0.00 | 0.033 |
| 2 |        |                                                              | 902    | 0.2%  | 1     |       |
| 1 | Z80.3  | Family history of malignant neoplasm of breast               | 736    | 2.8%  | <0.00 | 0.127 |
| 2 |        |                                                              | 5,122  | 1.1%  | 1     |       |

### Procedure

| Group | Mean ± SD | Patients | % of Group | P-Value | SMD   |
|-------|-----------|----------|------------|---------|-------|
| 1     |           | 306      | 1.2%       | <0.00   | 0.123 |
| 2     |           | 825      | 0.2%       | 1       |       |
| 1     |           | 53       | 0.2%       | <0.00   | 0.048 |
| 2     |           | 2,303    | 0.5%       | 1       |       |

### Medication

| Group | Mean ± SD | Patients | % of Group | P-Value | SMD   |
|-------|-----------|----------|------------|---------|-------|
| 1     |           | 14,271   | 54.9%      | <0.00   | 0.780 |
| 2     |           | 93,949   | 19.7%      | 1       |       |
| 1     |           | 6,822    | 26.2%      | <0.00   | 0.373 |
| 2     |           | 56,352   | 11.8%      | 1       |       |

|   |       |                                                    |        |       |       |       |
|---|-------|----------------------------------------------------|--------|-------|-------|-------|
| 1 | A10B  | Alpha glucosidase inhibitors                       | 112    | 0.4%  | <0.00 | 0.049 |
| 2 | F     |                                                    | 784    | 0.2%  | 1     |       |
| 1 | A10B  | Thiazolidinediones                                 | 1,834  | 7.1%  | <0.00 | 0.170 |
| 2 | G     |                                                    | 15,689 | 3.3%  | 1     |       |
| 1 | A10B  | Dipeptidyl peptidase 4 (DPP-4) inhibitors          | 4,637  | 17.8% | <0.00 | 0.444 |
| 2 | H     |                                                    | 20,235 | 4.3%  | 1     |       |
| 1 | A10B  | Sodium-glucose co-transporter 2 (SGLT2) inhibitors | 2,219  | 8.5%  | <0.00 | 0.391 |
| 2 | K     |                                                    | 2,614  | 0.5%  | 1     |       |
| 1 | A10B  | Other blood glucose lowering drugs, excl. insulins | 297    | 1.1%  | <0.00 | 0.047 |
| 2 | X     |                                                    | 3,287  | 0.7%  | 1     |       |
| 1 | HS200 | CONTRACEPTIVE S,SYSTEMIC                           | 1,345  | 5.2%  | <0.00 | 0.237 |
| 2 |       |                                                    | 5,117  | 1.1%  | 1     |       |
| 1 | 10324 | tamoxifen                                          | 37     | 0.1%  | <0.00 | 0.026 |
| 2 |       |                                                    | 287    | 0.1%  | 1     |       |

**Group 1 (N = 25,750) and group 2 (N = 25,750) characteristics after propensity score matching**

**Demographics**

| Group | Mean ± SD     | Patients | % of Group | P-Value | SMD   |
|-------|---------------|----------|------------|---------|-------|
| 1     | 54.9 +/- 11.9 | 25,750   | 100%       | 0.621   | 0.004 |
| 2     | 54.9 +/- 13.6 | 25,750   | 100%       |         |       |
| 1     |               | 16,960   | 65.9%      | <0.00   | 0.040 |
| 2     |               | 17,446   | 67.8%      |         |       |
| 1     |               | 122      | 0.5%       | 0.796   | 0.002 |
| 2     |               | 118      | 0.5%       |         |       |
| 1     |               | 2,753    | 10.7%      | 0.041   | 0.018 |
| 2     |               | 2,611    | 10.1%      |         |       |
| 1     |               | 105      | 0.4%       | 0.623   | 0.004 |
| 2     |               | 98       | 0.4%       |         |       |
| 1     |               | 5,052    | 19.6%      | 0.018   | 0.021 |
| 2     |               | 4,841    | 18.8%      |         |       |
| 1     |               | 18,166   | 70.5%      | 0.013   | 0.022 |
| 2     |               | 18,423   | 71.5%      |         |       |
| 1     |               | 2,532    | 9.8%       | 0.494   | 0.006 |
| 2     |               | 2,486    | 9.7%       |         |       |
| 1     |               | 4,407    | 17.1%      | 0.094   | 0.015 |
| 2     |               | 4,265    | 16.6%      |         |       |

| 1                | 2028-9 | Asian                                                                                         |           | 616      | 2.4%       | 0.001   | 0.029 |
|------------------|--------|-----------------------------------------------------------------------------------------------|-----------|----------|------------|---------|-------|
| 2                |        |                                                                                               |           | 507      | 2.0%       |         |       |
| <b>Diagnosis</b> |        |                                                                                               |           |          |            |         |       |
| Group            |        |                                                                                               | Mean ± SD | Patients | % of Group | P-Value | SMD   |
| 1                | Z55-   | Persons with potential health hazards related to socioeconomic and psychosocial circumstances |           | 462      | 1.8%       | 0.616   | 0.004 |
| 2                | Z65    |                                                                                               |           | 447      | 1.7%       |         |       |
| 1                | E66    | Overweight and obesity                                                                        |           | 10,268   | 39.9%      | 0.893   | 0.001 |
| 2                |        |                                                                                               |           | 10,283   | 39.9%      |         |       |
| 1                | Z68.3  | Body mass index [BMI] 30-39, adult                                                            |           | 1,777    | 6.9%       | 0.011   | 0.022 |
| 2                |        |                                                                                               |           | 1,633    | 6.3%       |         |       |
| 1                | Z68.4  | Body mass index [BMI] 40 or greater, adult                                                    |           | 2,098    | 8.1%       | 0.001   | 0.031 |
| 2                |        |                                                                                               |           | 1,888    | 7.3%       |         |       |
| 1                | Z68.25 | Body mass index [BMI] 25.0-25.9, adult                                                        |           | 56       | 0.2%       | 0.432   | 0.007 |
| 2                |        |                                                                                               |           | 48       | 0.2%       |         |       |
| 1                | Z68.26 | Body mass index [BMI] 26.0-26.9, adult                                                        |           | 50       | 0.2%       | 0.291   | 0.009 |
| 2                |        |                                                                                               |           | 40       | 0.2%       |         |       |
| 1                | Z68.27 | Body mass index [BMI] 27.0-27.9, adult                                                        |           | 87       | 0.3%       | 0.007   | 0.024 |
| 2                |        |                                                                                               |           | 55       | 0.2%       |         |       |
| 1                | Z68.28 | Body mass index [BMI] 28.0-28.9, adult                                                        |           | 106      | 0.4%       | 0.047   | 0.018 |
| 2                |        |                                                                                               |           | 79       | 0.3%       |         |       |
| 1                | Z68.29 | Body mass index [BMI] 29.0-29.9, adult                                                        |           | 118      | 0.5%       | 0.173   | 0.012 |
| 2                |        |                                                                                               |           | 98       | 0.4%       |         |       |
| 1                | Z80    | Family history of primary malignant neoplasm                                                  |           | 1,399    | 5.4%       | 0.086   | 0.015 |
| 2                |        |                                                                                               |           | 1,312    | 5.1%       |         |       |
| 1                | Z15.0  | Genetic susceptibility to malignant neoplasm                                                  |           | 17       | 0.1%       | 0.257   | 0.010 |
| 2                |        |                                                                                               |           | 11       | 0.0%       |         |       |
| 1                | Z12    | Encounter for screening for malignant neoplasms                                               |           | 7,704    | 29.9%      | 0.013   | 0.022 |
| 2                |        |                                                                                               |           | 7,448    | 28.9%      |         |       |

|   |        |                                                              |       |       |       |        |
|---|--------|--------------------------------------------------------------|-------|-------|-------|--------|
| 1 | Z85    | Personal history of malignant neoplasm                       | 590   | 2.3%  | 0.049 | 0.017  |
| 2 |        |                                                              | 525   | 2.0%  |       |        |
| 1 | Z98.84 | Bariatric surgery status                                     | 455   | 1.8%  | 0.543 | 0.005  |
| 2 |        |                                                              | 437   | 1.7%  |       |        |
| 1 | E66.0  | Obesity due to excess calories                               | 5,269 | 20.5% | 0.484 | 0.006  |
| 2 |        |                                                              | 5,205 | 20.2% |       |        |
| 1 | E66.2  | Morbid (severe) obesity with alveolar hypoventilation        | 82    | 0.3%  | 0.064 | 0.016  |
| 2 |        |                                                              | 60    | 0.2%  |       |        |
| 1 | E66.3  | Overweight                                                   | 514   | 2.0%  | 0.034 | 0.019  |
| 2 |        |                                                              | 449   | 1.7%  |       |        |
| 1 | E66.8  | Other obesity                                                | 130   | 0.5%  | 0.088 | 0.015  |
| 2 |        |                                                              | 104   | 0.4%  |       |        |
| 1 | E66.9  | Obesity, unspecified                                         | 7,716 | 30.0% | 0.223 | 0.011  |
| 2 |        |                                                              | 7,843 | 30.5% |       |        |
| 1 | Z79.89 | Hormone replacement therapy                                  | 136   | 0.5%  | 0.045 | 0.018  |
| 2 | 0      |                                                              | 105   | 0.4%  |       |        |
| 1 | Z92.23 | Personal history of estrogen therapy                         | 10    | 0.0%  | 1     | <0.001 |
| 2 |        |                                                              | 10    | 0.0%  |       |        |
| 1 | E28.2  | Polycystic ovarian syndrome                                  | 938   | 3.6%  | 0.814 | 0.002  |
| 2 |        |                                                              | 928   | 3.6%  |       |        |
| 1 | Z80.41 | Family history of malignant neoplasm of ovary                | 99    | 0.4%  | 0.338 | 0.008  |
| 2 |        |                                                              | 86    | 0.3%  |       |        |
| 1 | Z80.49 | Family history of malignant neoplasm of other genital organs | 37    | 0.1%  | 0.722 | 0.003  |
| 2 |        |                                                              | 34    | 0.1%  |       |        |
| 1 | N85.0  | Endometrial hyperplasia                                      | 180   | 0.7%  | 0.387 | 0.008  |
| 2 |        |                                                              | 164   | 0.6%  |       |        |
| 1 | D25    | Leiomyoma of uterus                                          | 1,018 | 4.0%  | 0.107 | 0.014  |
| 2 |        |                                                              | 948   | 3.7%  |       |        |
| 1 | D26    | Other benign neoplasms of uterus                             | 43    | 0.2%  | 0.365 | 0.008  |
| 2 |        |                                                              | 35    | 0.1%  |       |        |
| 1 | D27    | Benign neoplasm of ovary                                     | 94    | 0.4%  | 0.017 | 0.021  |
| 2 |        |                                                              | 64    | 0.2%  |       |        |
| 1 | Z80.3  | Family history of malignant neoplasm of breast               | 724   | 2.8%  | 0.081 | 0.015  |
| 2 |        |                                                              | 660   | 2.6%  |       |        |

### Procedure

| Group | Mean ± SD | Patients | % of Group | P-Value | SMD |
|-------|-----------|----------|------------|---------|-----|
|-------|-----------|----------|------------|---------|-----|

|   |       |                                              |     |      |       |       |
|---|-------|----------------------------------------------|-----|------|-------|-------|
| 1 | 58300 | Insertion of<br>intrauterine device<br>(IUD) | 290 | 1.1% | 0.144 | 0.013 |
| 2 |       |                                              | 256 | 1.0% |       |       |
| 1 | 1001  | Radiation                                    | 53  | 0.2% | 0.844 | 0.002 |
| 2 |       |                                              | 51  | 0.2% |       |       |

**Medication**

| Group |       |                                                           | Mean ± SD | Patients | % of<br>Group | P-<br>Value | SMD   |
|-------|-------|-----------------------------------------------------------|-----------|----------|---------------|-------------|-------|
| 1     | A10B  | Biguanides                                                |           | 14,013   | 54.4%         | 0.018       | 0.021 |
| 2     | A     |                                                           |           | 14,280   | 55.5%         |             |       |
| 1     | A10B  | Sulfonylureas                                             |           | 6,700    | 26.0%         | 0.013       | 0.022 |
| 2     | B     |                                                           |           | 6,948    | 27.0%         |             |       |
| 1     | A10B  | Alpha glucosidase<br>inhibitors                           |           | 109      | 0.4%          | 0.892       | 0.001 |
| 2     | F     |                                                           |           | 107      | 0.4%          |             |       |
| 1     | A10B  | Thiazolidinediones                                        |           | 1,799    | 7.0%          | 0.311       | 0.009 |
| 2     | G     |                                                           |           | 1,858    | 7.2%          |             |       |
| 1     | A10B  | Dipeptidyl peptidase<br>4 (DPP-4) inhibitors              |           | 4,454    | 17.3%         | 0.077       | 0.016 |
| 2     | H     |                                                           |           | 4,607    | 17.9%         |             |       |
| 1     | A10B  | Sodium-glucose co-<br>transporter 2<br>(SGLT2) inhibitors |           | 1,978    | 7.7%          | <0.00<br>1  | 0.042 |
| 2     | K     |                                                           |           | 1,699    | 6.6%          |             |       |
| 1     | A10B  | Other blood glucose<br>lowering drugs, excl.<br>insulins  |           | 291      | 1.1%          | 0.934       | 0.001 |
| 2     | X     |                                                           |           | 293      | 1.1%          |             |       |
| 1     | HS200 | CONTRACEPTIVE<br>S,SYSTEMIC                               |           | 1,299    | 5.0%          | 0.025       | 0.020 |
| 2     |       |                                                           |           | 1,190    | 4.6%          |             |       |
| 1     | 10324 | tamoxifen                                                 |           | 37       | 0.1%          | 0.096       | 0.015 |
| 2     |       |                                                           |           | 24       | 0.1%          |             |       |



**eTable 5.** Characteristics of the GLP-1RA/no insulin group and insulin/no GLP-1RA group before and after matched for covariates related to gallbladder cancer for the study populations of patients with T2D and no history of any OAC

| <b>Group 1 (N = 48,983) and group 2 (N = 1,044,745) characteristics before propensity score matching</b> |        |                                                                                               |           |            |         |       |
|----------------------------------------------------------------------------------------------------------|--------|-----------------------------------------------------------------------------------------------|-----------|------------|---------|-------|
| <b>Demographics</b>                                                                                      |        |                                                                                               |           |            |         |       |
| Group                                                                                                    |        | Mean ± SD                                                                                     | Patients  | % of Group | P-Value | SMD   |
| 1                                                                                                        | AI     | Age at Index                                                                                  | 48,983    | 100%       | <0.00   | 0.420 |
| 2                                                                                                        |        |                                                                                               | 1,044,745 | 100%       | 1       |       |
| 1                                                                                                        | 2106-3 | White                                                                                         | 32,592    | 66.5%      | <0.00   | 0.122 |
| 2                                                                                                        |        |                                                                                               | 633,989   | 60.7%      | 1       |       |
| 1                                                                                                        | UNK    | Unknown Race                                                                                  | 7,099     | 14.5%      | <0.00   | 0.025 |
| 2                                                                                                        |        |                                                                                               | 142,470   | 13.6%      | 1       |       |
| 1                                                                                                        | F      | Female                                                                                        | 26,011    | 53.1%      | <0.00   | 0.151 |
| 2                                                                                                        |        |                                                                                               | 476,110   | 45.6%      | 1       |       |
| 1                                                                                                        | UN     | Unknown Gender                                                                                | 2,252     | 4.6%       | <0.00   | 0.106 |
| 2                                                                                                        |        |                                                                                               | 27,321    | 2.6%       | 1       |       |
| 1                                                                                                        | 2186-5 | Not Hispanic or Latino                                                                        | 33,188    | 67.8%      | <0.00   | 0.098 |
| 2                                                                                                        |        |                                                                                               | 659,375   | 63.1%      | 1       |       |
| 1                                                                                                        | 2135-2 | Hispanic or Latino                                                                            | 4,151     | 8.5%       | <0.00   | 0.019 |
| 2                                                                                                        |        |                                                                                               | 94,136    | 9.0%       | 1       |       |
| 1                                                                                                        | 2054-5 | Black or African American                                                                     | 6,265     | 12.8%      | <0.00   | 0.120 |
| 2                                                                                                        |        |                                                                                               | 178,267   | 17.1%      | 1       |       |
| 1                                                                                                        | M      | Male                                                                                          | 20,720    | 42.3%      | <0.00   | 0.191 |
| 2                                                                                                        |        |                                                                                               | 541,314   | 51.8%      | 1       |       |
| 1                                                                                                        | 2028-9 | Asian                                                                                         | 1,204     | 2.5%       | <0.00   | 0.087 |
| 2                                                                                                        |        |                                                                                               | 41,822    | 4.0%       | 1       |       |
| <b>Diagnosis</b>                                                                                         |        |                                                                                               |           |            |         |       |
| Group                                                                                                    |        | Mean ± SD                                                                                     | Patients  | % of Group | P-Value | SMD   |
| 1                                                                                                        | Z55-   | Persons with potential health hazards related to socioeconomic and psychosocial circumstances | 686       | 1.4%       | <0.00   | 0.022 |
| 2                                                                                                        | Z65    |                                                                                               | 12,021    | 1.2%       | 1       |       |
| 1                                                                                                        | E66    | Overweight and obesity                                                                        | 18,401    | 37.6%      | <0.00   | 0.504 |
| 2                                                                                                        |        |                                                                                               | 166,445   | 15.9%      | 1       |       |

|   |        |                                                       |         |       |       |        |
|---|--------|-------------------------------------------------------|---------|-------|-------|--------|
| 1 | Z68.3  | Body mass index                                       | 4,204   | 8.6%  | <0.00 | 0.183  |
| 2 |        | [BMI] 30-39, adult                                    | 43,128  | 4.1%  | 1     |        |
| 1 | Z68.4  | Body mass index                                       | 3,886   | 7.9%  | <0.00 | 0.208  |
| 2 |        | [BMI] 40 or greater, adult                            | 33,396  | 3.2%  | 1     |        |
| 1 | Z68.25 | Body mass index                                       | 157     | 0.3%  | 0.563 | 0.003  |
| 2 |        | [BMI] 25.0-25.9, adult                                | 3,510   | 0.3%  |       |        |
| 1 | Z68.26 | Body mass index                                       | 171     | 0.3%  | 0.957 | <0.001 |
| 2 |        | [BMI] 26.0-26.9, adult                                | 3,632   | 0.3%  |       |        |
| 1 | Z68.27 | Body mass index                                       | 288     | 0.6%  | <0.00 | 0.026  |
| 2 |        | [BMI] 27.0-27.9, adult                                | 4,209   | 0.4%  | 1     |        |
| 1 | Z68.28 | Body mass index                                       | 344     | 0.7%  | <0.00 | 0.036  |
| 2 |        | [BMI] 28.0-28.9, adult                                | 4,508   | 0.4%  | 1     |        |
| 1 | Z68.29 | Body mass index                                       | 398     | 0.8%  | <0.00 | 0.044  |
| 2 |        | [BMI] 29.0-29.9, adult                                | 4,843   | 0.5%  | 1     |        |
| 1 | F17    | Nicotine dependence                                   | 3,593   | 7.3%  | <0.00 | 0.070  |
| 2 |        |                                                       | 96,860  | 9.3%  | 1     |        |
| 1 | E66.0  | Obesity due to excess calories                        | 9,157   | 18.7% | <0.00 | 0.366  |
| 2 |        |                                                       | 69,998  | 6.7%  | 1     |        |
| 1 | E66.2  | Morbid (severe) obesity with alveolar hypoventilation | 150     | 0.3%  | 0.118 | 0.007  |
| 2 |        |                                                       | 3,643   | 0.3%  |       |        |
| 1 | E66.3  | Overweight                                            | 1,010   | 2.1%  | <0.00 | 0.122  |
| 2 |        |                                                       | 6,796   | 0.7%  | 1     |        |
| 1 | E66.8  | Other obesity                                         | 235     | 0.5%  | <0.00 | 0.065  |
| 2 |        |                                                       | 1,298   | 0.1%  | 1     |        |
| 1 | E66.9  | Obesity, unspecified                                  | 13,805  | 28.2% | <0.00 | 0.433  |
| 2 |        |                                                       | 118,555 | 11.3% | 1     |        |
| 1 | Z72.0  | Tobacco use                                           | 1,064   | 2.2%  | <0.00 | 0.064  |
| 2 |        |                                                       | 13,876  | 1.3%  | 1     |        |
| 1 | Q44.5  | Other congenital malformations of bile ducts          | 11      | 0.0%  | 0.083 | 0.009  |
| 2 |        |                                                       | 396     | 0.0%  |       |        |
| 1 | K82.4  | Cholesterolosis of gallbladder                        | 99      | 0.2%  | <0.00 | 0.023  |
| 2 |        |                                                       | 1,160   | 0.1%  | 1     |        |
| 1 | K83.0  | Primary sclerosing cholangitis                        | 10      | 0.0%  | 0.005 | 0.010  |
| 2 | 1      |                                                       | 87      | 0.0%  |       |        |

|   |        |                                                                  |     |      |       |       |
|---|--------|------------------------------------------------------------------|-----|------|-------|-------|
| 1 | A01.0  | Typhoid fever                                                    | 10  | 0.0% | <0.00 | 0.017 |
| 2 |        |                                                                  | 23  | 0.0% | 1     |       |
| 1 | Z85.09 | Personal history of malignant neoplasm of other digestive organs | 10  | 0.0% | 0.571 | 0.003 |
| 2 |        |                                                                  | 256 | 0.0% |       |       |
| 1 | D13.5  | Benign neoplasm of extrahepatic bile ducts                       | 27  | 0.1% | 0.314 | 0.004 |
| 2 |        |                                                                  | 472 | 0.0% |       |       |

### Medication

| Group |      | Mean ± SD                                          | Patients | % of Group | P-Value | SMD   |
|-------|------|----------------------------------------------------|----------|------------|---------|-------|
| 1     | A10B | Biguanides                                         | 27,075   | 55.3%      | <0.00   | 0.806 |
| 2     | A    |                                                    | 199,802  | 19.1%      | 1       |       |
| 1     | A10B | Sulfonylureas                                      | 14,077   | 28.7%      | <0.00   | 0.424 |
| 2     | B    |                                                    | 125,703  | 12.0%      | 1       |       |
| 1     | A10B | Alpha glucosidase inhibitors                       | 229      | 0.5%       | <0.00   | 0.054 |
| 2     | F    |                                                    | 1,718    | 0.2%       | 1       |       |
| 1     | A10B | Thiazolidinediones                                 | 4,107    | 8.4%       | <0.00   | 0.213 |
| 2     | G    |                                                    | 35,435   | 3.4%       | 1       |       |
| 1     | A10B | Dipeptidyl peptidase 4 (DPP-4) inhibitors          | 9,485    | 19.4%      | <0.00   | 0.481 |
| 2     | H    |                                                    | 44,595   | 4.3%       | 1       |       |
| 1     | A10B | Sodium-glucose co-transporter 2 (SGLT2) inhibitors | 4,808    | 9.8%       | <0.00   | 0.423 |
| 2     | K    |                                                    | 6,447    | 0.6%       | 1       |       |
| 1     | A10B | Other blood glucose lowering drugs, excl. insulins | 614      | 1.3%       | <0.00   | 0.059 |
| 2     | X    |                                                    | 7,048    | 0.7%       | 1       |       |

### Group 1 (N = 48,587) and group 2 (N = 48,587) characteristics after propensity score matching

#### Demographics

| Group |        | Mean ± SD    | Patients      | % of Group | P-Value | SMD    |
|-------|--------|--------------|---------------|------------|---------|--------|
| 1     | AI     | Age at Index | 55.9 +/- 11.8 | 48,587     | 100%    | 0.005  |
| 2     |        |              | 56.1 +/- 12.6 | 48,587     | 100%    |        |
| 1     | 2106-3 | White        | 32,319        | 66.5%      | <0.00   | 0.031  |
| 2     |        |              | 33,024        | 68.0%      | 1       |        |
| 1     | UNK    | Unknown Race | 7,011         | 14.4%      | 0.007   | 0.017  |
| 2     |        |              | 6,716         | 13.8%      |         |        |
| 1     | F      | Female       | 25,779        | 53.1%      | 0.979   | <0.001 |
| 2     |        |              | 25,775        | 53.0%      |         |        |

|   |        |                           |        |       |       |       |
|---|--------|---------------------------|--------|-------|-------|-------|
| 1 | UN     | Unknown Gender            | 2,186  | 4.5%  | 0.465 | 0.005 |
| 2 |        |                           | 2,139  | 4.4%  |       |       |
| 1 | 2186-5 | Not Hispanic or Latino    | 32,920 | 67.8% | 0.019 | 0.015 |
| 2 |        |                           | 33,260 | 68.5% |       |       |
| 1 | 2135-2 | Hispanic or Latino        | 4,126  | 8.5%  | 0.074 | 0.011 |
| 2 |        |                           | 3,972  | 8.2%  |       |       |
| 1 | 2054-5 | Black or African American | 6,241  | 12.8% | 0.159 | 0.009 |
| 2 |        |                           | 6,095  | 12.5% |       |       |
| 1 | M      | Male                      | 20,622 | 42.4% | 0.741 | 0.002 |
| 2 |        |                           | 20,673 | 42.5% |       |       |
| 1 | 2028-9 | Asian                     | 1,199  | 2.5%  | 0.022 | 0.015 |
| 2 |        |                           | 1,091  | 2.2%  |       |       |

### Diagnosis

| Group           | Mean ± SD                                                                                     | Patients         | % of Group     | P-Value | SMD   |
|-----------------|-----------------------------------------------------------------------------------------------|------------------|----------------|---------|-------|
| 1 Z55-<br>2 Z65 | Persons with potential health hazards related to socioeconomic and psychosocial circumstances | 682<br>596       | 1.4%<br>1.2%   | 0.015   | 0.016 |
| E66             | Overweight and obesity                                                                        | 17,410<br>17,367 | 36.9%<br>36.8% | 0.772   | 0.002 |
| 1 Z68.3<br>2    | Body mass index [BMI] 30-39, adult                                                            | 3,964<br>3,562   | 8.4%<br>7.5%   | <0.001  | 0.031 |
| 1 Z68.4<br>2    | Body mass index [BMI] 40 or greater, adult                                                    | 3,642<br>3,272   | 7.7%<br>6.9%   | <0.001  | 0.030 |
| 1 Z68.25<br>2   | Body mass index [BMI] 25.0-25.9, adult                                                        | 151<br>134       | 0.3%<br>0.3%   | 0.313   | 0.007 |
| 1 Z68.26<br>2   | Body mass index [BMI] 26.0-26.9, adult                                                        | 169<br>156       | 0.4%<br>0.3%   | 0.470   | 0.005 |
| 1 Z68.27<br>2   | Body mass index [BMI] 27.0-27.9, adult                                                        | 278<br>236       | 0.6%<br>0.5%   | 0.063   | 0.012 |
| 1 Z68.28<br>2   | Body mass index [BMI] 28.0-28.9, adult                                                        | 322<br>286       | 0.7%<br>0.6%   | 0.143   | 0.010 |

|   |        |                                                                  |        |       |        |        |
|---|--------|------------------------------------------------------------------|--------|-------|--------|--------|
| 1 | Z68.29 | Body mass index [BMI] 29.0-29.9, adult                           | 382    | 0.8%  | 0.042  | 0.013  |
| 2 |        |                                                                  | 328    | 0.7%  |        |        |
| 1 | F17    | Nicotine dependence                                              | 3,576  | 7.4%  | <0.001 | 0.032  |
| 2 |        |                                                                  | 3,185  | 6.6%  |        |        |
| 1 | E66.0  | Obesity due to excess calories                                   | 8,635  | 18.3% | 0.345  | 0.006  |
| 2 |        |                                                                  | 8,523  | 18.0% |        |        |
| 1 | E66.2  | Morbid (severe) obesity with alveolar hypoventilation            | 139    | 0.3%  | 0.762  | 0.002  |
| 2 |        |                                                                  | 134    | 0.3%  |        |        |
| 1 | E66.3  | Overweight                                                       | 941    | 2.0%  | 0.075  | 0.012  |
| 2 |        |                                                                  | 866    | 1.8%  |        |        |
| 1 | E66.8  | Other obesity                                                    | 204    | 0.4%  | 1      | <0.001 |
| 2 |        |                                                                  | 204    | 0.4%  |        |        |
| 1 | E66.9  | Obesity, unspecified                                             | 13,034 | 27.6% | 0.948  | <0.001 |
| 2 |        |                                                                  | 13,043 | 27.6% |        |        |
| 1 | Z72.0  | Tobacco use                                                      | 1,044  | 2.2%  | 0.157  | 0.009  |
| 2 |        |                                                                  | 981    | 2.0%  |        |        |
| 1 | K82.4  | Cholesterolosis of gallbladder                                   | 93     | 0.2%  | 0.040  | 0.013  |
| 2 |        |                                                                  | 67     | 0.1%  |        |        |
| 1 | K83.0  | Primary sclerosing cholangitis                                   | 10     | 0.0%  | 1      | <0.001 |
| 2 | 1      |                                                                  | 10     | 0.0%  |        |        |
| 1 | A01.0  | Typhoid fever                                                    | 10     | 0.0%  | 1      | <0.001 |
| 2 |        |                                                                  | 10     | 0.0%  |        |        |
| 1 | Z85.09 | Personal history of malignant neoplasm of other digestive organs | 10     | 0.0%  | 1      | <0.001 |
| 2 |        |                                                                  | 10     | 0.0%  |        |        |
| 1 | D13.5  | Benign neoplasm of extrahepatic bile ducts                       | 26     | 0.1%  | 0.297  | 0.007  |
| 2 |        |                                                                  | 19     | 0.0%  |        |        |

### Medication

| Group  | Mean ± SD | Patients | % of Group | P-Value | SMD   |
|--------|-----------|----------|------------|---------|-------|
| 1 A10B |           | 26,679   | 54.9%      | 0.010   | 0.017 |
| 2 A    |           | 27,080   | 55.7%      |         |       |
| 1 A10B |           | 13,835   | 28.5%      | 0.011   | 0.016 |
| 2 B    |           | 14,192   | 29.2%      |         |       |
| 1 A10B |           | 219      | 0.5%       | 0.924   | 0.001 |
| 2 F    |           | 217      | 0.4%       |         |       |
| 1 A10B |           | 4,045    | 8.3%       | 0.532   | 0.004 |
| 2 G    |           | 4,099    | 8.4%       |         |       |

|   |      |                                     |       |       |       |       |
|---|------|-------------------------------------|-------|-------|-------|-------|
| 1 | A10B | Dipeptidyl peptidase                | 9,167 | 18.9% | 0.556 | 0.004 |
| 2 | H    | 4 (DPP-4) inhibitors                | 9,239 | 19.0% |       |       |
| 1 | A10B | Sodium-glucose co-                  | 4,419 | 9.1%  | <0.00 | 0.028 |
| 2 | K    | transporter 2<br>(SGLT2) inhibitors | 4,037 | 8.3%  |       |       |
| 1 | A10B | Other blood glucose                 | 609   | 1.3%  | 0.098 | 0.011 |
| 2 | X    | lowering drugs, excl.<br>insulins   | 553   | 1.1%  |       |       |

**eTable 6.** Characteristics of the GLP-1RA/no insulin group and insulin/no GLP-1RA group before and after matched for covariates related to stomach cancer for the study populations of patients with T2D and no history of any OAC

| <b>Group 1 (N = 48,983) and group 2 (N = 1,044,745) characteristics before propensity score matching</b> |        |                                                                    |           |            |         |       |
|----------------------------------------------------------------------------------------------------------|--------|--------------------------------------------------------------------|-----------|------------|---------|-------|
| <b>Demographics</b>                                                                                      |        |                                                                    |           |            |         |       |
| Group                                                                                                    |        | Mean ± SD                                                          | Patients  | % of Group | P-Value | SMD   |
| 1                                                                                                        | AI     | Age at Index                                                       | 48,983    | 100%       | <0.00   | 0.420 |
| 2                                                                                                        |        |                                                                    | 1,044,745 | 100%       | 1       |       |
| 1                                                                                                        | 2106-3 | White                                                              | 32,592    | 66.5%      | <0.00   | 0.122 |
| 2                                                                                                        |        |                                                                    | 633,989   | 60.7%      | 1       |       |
| 1                                                                                                        | 1002-5 | American Indian or Alaska Native                                   | 199       | 0.4%       | 0.004   | 0.013 |
| 2                                                                                                        |        |                                                                    | 3,443     | 0.3%       |         |       |
| 1                                                                                                        | UNK    | Unknown Race                                                       | 7,099     | 14.5%      | <0.00   | 0.025 |
| 2                                                                                                        |        |                                                                    | 142,470   | 13.6%      | 1       |       |
| 1                                                                                                        | F      | Female                                                             | 26,011    | 53.1%      | <0.00   | 0.151 |
| 2                                                                                                        |        |                                                                    | 476,110   | 45.6%      | 1       |       |
| 1                                                                                                        | 2076-8 | Native Hawaiian or Other Pacific Islander                          | 205       | 0.4%       | <0.00   | 0.071 |
| 2                                                                                                        |        |                                                                    | 10,677    | 1.0%       | 1       |       |
| 1                                                                                                        | UN     | Unknown Gender                                                     | 2,252     | 4.6%       | <0.00   | 0.106 |
| 2                                                                                                        |        |                                                                    | 27,321    | 2.6%       | 1       |       |
| 1                                                                                                        | 2186-5 | Not Hispanic or Latino                                             | 33,188    | 67.8%      | <0.00   | 0.098 |
| 2                                                                                                        |        |                                                                    | 659,375   | 63.1%      | 1       |       |
| 1                                                                                                        | 2135-2 | Hispanic or Latino                                                 | 4,151     | 8.5%       | <0.00   | 0.019 |
| 2                                                                                                        |        |                                                                    | 94,136    | 9.0%       | 1       |       |
| 1                                                                                                        | 2054-5 | Black or African American                                          | 6,265     | 12.8%      | <0.00   | 0.120 |
| 2                                                                                                        |        |                                                                    | 178,267   | 17.1%      | 1       |       |
| 1                                                                                                        | M      | Male                                                               | 20,720    | 42.3%      | <0.00   | 0.191 |
| 2                                                                                                        |        |                                                                    | 541,314   | 51.8%      | 1       |       |
| 1                                                                                                        | 2028-9 | Asian                                                              | 1,204     | 2.5%       | <0.00   | 0.087 |
| 2                                                                                                        |        |                                                                    | 41,822    | 4.0%       | 1       |       |
| <b>Diagnosis</b>                                                                                         |        |                                                                    |           |            |         |       |
| Group                                                                                                    |        | Mean ± SD                                                          | Patients  | % of Group | P-Value | SMD   |
| 1                                                                                                        | Z55-   | Persons with potential health hazards related to socioeconomic and | 686       | 1.4%       | <0.00   | 0.022 |
| 2                                                                                                        | Z65    |                                                                    | 12,021    | 1.2%       | 1       |       |

|   |        | psychosocial<br>circumstances                   |         |       |       |        |
|---|--------|-------------------------------------------------|---------|-------|-------|--------|
| 1 | E66    | Overweight and obesity                          | 18,401  | 37.6% | <0.00 | 0.504  |
| 2 |        |                                                 | 166,445 | 15.9% | 1     |        |
| 1 | Z68.3  | Body mass index [BMI] 30-39, adult              | 4,204   | 8.6%  | <0.00 | 0.183  |
| 2 |        |                                                 | 43,128  | 4.1%  | 1     |        |
| 1 | Z68.4  | Body mass index [BMI] 40 or greater, adult      | 3,886   | 7.9%  | <0.00 | 0.208  |
| 2 |        |                                                 | 33,396  | 3.2%  | 1     |        |
| 1 | Z68.25 | Body mass index [BMI] 25.0-25.9, adult          | 157     | 0.3%  | 0.563 | 0.003  |
| 2 |        |                                                 | 3,510   | 0.3%  |       |        |
| 1 | Z68.26 | Body mass index [BMI] 26.0-26.9, adult          | 171     | 0.3%  | 0.957 | <0.001 |
| 2 |        |                                                 | 3,632   | 0.3%  |       |        |
| 1 | Z68.27 | Body mass index [BMI] 27.0-27.9, adult          | 288     | 0.6%  | <0.00 | 0.026  |
| 2 |        |                                                 | 4,209   | 0.4%  | 1     |        |
| 1 | Z68.28 | Body mass index [BMI] 28.0-28.9, adult          | 344     | 0.7%  | <0.00 | 0.036  |
| 2 |        |                                                 | 4,508   | 0.4%  | 1     |        |
| 1 | Z68.29 | Body mass index [BMI] 29.0-29.9, adult          | 398     | 0.8%  | <0.00 | 0.044  |
| 2 |        |                                                 | 4,843   | 0.5%  | 1     |        |
| 1 | F10    | Alcohol related disorders                       | 563     | 1.1%  | <0.00 | 0.115  |
| 2 |        |                                                 | 28,538  | 2.7%  | 1     |        |
| 1 | Z80    | Family history of primary malignant neoplasm    | 2,042   | 4.2%  | <0.00 | 0.136  |
| 2 |        |                                                 | 19,398  | 1.9%  | 1     |        |
| 1 | Z15.0  | Genetic susceptibility to malignant neoplasm    | 24      | 0.0%  | <0.00 | 0.019  |
| 2 |        |                                                 | 156     | 0.0%  | 1     |        |
| 1 | Z12    | Encounter for screening for malignant neoplasms | 12,272  | 25.1% | <0.00 | 0.402  |
| 2 |        |                                                 | 105,217 | 10.1% | 1     |        |
| 1 | Z85    | Personal history of malignant neoplasm          | 1,239   | 2.5%  | <0.00 | 0.066  |
| 2 |        |                                                 | 38,294  | 3.7%  | 1     |        |
| 1 | Z98.84 | Bariatric surgery status                        | 632     | 1.3%  | <0.00 | 0.085  |
| 2 |        |                                                 | 5,136   | 0.5%  | 1     |        |
| 1 | F17    | Nicotine dependence                             | 3,593   | 7.3%  | <0.00 | 0.070  |
| 2 |        |                                                 | 96,860  | 9.3%  | 1     |        |



|                   |        |                                                                               |          |            |         |       |
|-------------------|--------|-------------------------------------------------------------------------------|----------|------------|---------|-------|
| 1                 | E66.0  | Obesity due to excess calories                                                | 9,157    | 18.7%      | <0.00   | 0.366 |
| 2                 |        |                                                                               | 69,998   | 6.7%       | 1       |       |
| 1                 | E66.2  | Morbid (severe) obesity with alveolar hypoventilation                         | 150      | 0.3%       | 0.118   | 0.007 |
| 2                 |        |                                                                               | 3,643    | 0.3%       |         |       |
| 1                 | E66.3  | Overweight                                                                    | 1,010    | 2.1%       | <0.00   | 0.122 |
| 2                 |        |                                                                               | 6,796    | 0.7%       | 1       |       |
| 1                 | E66.8  | Other obesity                                                                 | 235      | 0.5%       | <0.00   | 0.065 |
| 2                 |        |                                                                               | 1,298    | 0.1%       | 1       |       |
| 1                 | E66.9  | Obesity, unspecified                                                          | 13,805   | 28.2%      | <0.00   | 0.433 |
| 2                 |        |                                                                               | 118,555  | 11.3%      | 1       |       |
| 1                 | Z72.0  | Tobacco use                                                                   | 1,064    | 2.2%       | <0.00   | 0.064 |
| 2                 |        |                                                                               | 13,876   | 1.3%       | 1       |       |
| 1                 | Z85.09 | Personal history of malignant neoplasm of other digestive organs              | 10       | 0.0%       | 0.571   | 0.003 |
| 2                 |        |                                                                               | 256      | 0.0%       |         |       |
| 1                 | B96.8  | Helicobacter pylori [H. pylori] as the cause of diseases classified elsewhere | 254      | 0.5%       | <0.00   | 0.021 |
| 2                 | 1      |                                                                               | 3,973    | 0.4%       | 1       |       |
| 1                 | D13.1  | Benign neoplasm of stomach                                                    | 213      | 0.4%       | <0.00   | 0.023 |
| 2                 |        |                                                                               | 3,086    | 0.3%       | 1       |       |
| 1                 | K31.7  | Polyp of stomach and duodenum                                                 | 266      | 0.5%       | <0.00   | 0.028 |
| 2                 |        |                                                                               | 3,728    | 0.4%       | 1       |       |
| 1                 | D51.0  | Vitamin B12 deficiency anemia due to intrinsic factor deficiency              | 143      | 0.3%       | <0.00   | 0.018 |
| 2                 |        |                                                                               | 2,101    | 0.2%       | 1       |       |
| 1                 | Z80.0  | Family history of malignant neoplasm of digestive organs                      | 784      | 1.6%       | <0.00   | 0.089 |
| 2                 |        |                                                                               | 6,889    | 0.7%       | 1       |       |
| 1                 | D83    | Common variable immunodeficiency                                              | 19       | 0.0%       | 0.582   | 0.002 |
| 2                 |        |                                                                               | 356      | 0.0%       |         |       |
| 1                 | B27    | Infectious mononucleosis                                                      | 45       | 0.1%       | <0.00   | 0.016 |
| 2                 |        |                                                                               | 513      | 0.0%       | 1       |       |
| <b>Procedure</b>  |        |                                                                               |          |            |         |       |
| Group             |        | Mean ± SD                                                                     | Patients | % of Group | P-Value | SMD   |
| 1                 | 10073  | Excision Procedures on the Stomach                                            | 10       | 0.0%       | 0.057   | 0.008 |
| 2                 | 52     |                                                                               | 115      | 0.0%       |         |       |
| <b>Medication</b> |        |                                                                               |          |            |         |       |

| Group |      | Mean ± SD | Patients | % of Group | P-Value | SMD   |
|-------|------|-----------|----------|------------|---------|-------|
| 1     | A10B |           | 27,075   | 55.3%      | <0.00   | 0.806 |
| 2     | A    |           | 199,802  | 19.1%      | 1       |       |
| 1     | A10B |           | 14,077   | 28.7%      | <0.00   | 0.424 |
| 2     | B    |           | 125,703  | 12.0%      | 1       |       |
| 1     | A10B |           | 229      | 0.5%       | <0.00   | 0.054 |
| 2     | F    |           | 1,718    | 0.2%       | 1       |       |
| 1     | A10B |           | 4,107    | 8.4%       | <0.00   | 0.213 |
| 2     | G    |           | 35,435   | 3.4%       | 1       |       |
| 1     | A10B |           | 9,485    | 19.4%      | <0.00   | 0.481 |
| 2     | H    |           | 44,595   | 4.3%       | 1       |       |
| 1     | A10B |           | 4,808    | 9.8%       | <0.00   | 0.423 |
| 2     | K    |           | 6,447    | 0.6%       | 1       |       |
| 1     | A10B |           | 614      | 1.3%       | <0.00   | 0.059 |
| 2     | X    |           | 7,048    | 0.7%       | 1       |       |

**Group 1 (N = 48,449) and group 2 (N = 48,449) characteristics after propensity score matching**

**Demographics**

| Group |        | Mean ± SD     | Patients | % of Group | P-Value | SMD   |
|-------|--------|---------------|----------|------------|---------|-------|
| 1     | AI     | 55.9 +/- 11.7 | 48,449   | 100%       | 0.030   | 0.014 |
| 2     |        | 56.1 +/- 13.2 | 48,449   | 100%       |         |       |
| 1     | 2106-3 |               | 32,245   | 66.6%      | <0.00   | 0.042 |
| 2     |        |               | 33,198   | 68.5%      | 1       |       |
| 1     | 1002-5 |               | 196      | 0.4%       | 0.091   | 0.011 |
| 2     |        |               | 164      | 0.3%       |         |       |
| 1     | UNK    |               | 6,980    | 14.4%      | 0.002   | 0.020 |
| 2     |        |               | 6,650    | 13.7%      |         |       |
| 1     | F      |               | 25,712   | 53.1%      | 0.004   | 0.018 |
| 2     |        |               | 26,156   | 54.0%      |         |       |
| 1     | 2076-8 |               | 204      | 0.4%       | 0.011   | 0.016 |
| 2     |        |               | 156      | 0.3%       |         |       |
| 1     | UN     |               | 2,170    | 4.5%       | 0.037   | 0.013 |
| 2     |        |               | 2,038    | 4.2%       |         |       |
| 1     | 2186-5 |               | 32,837   | 67.8%      | 0.036   | 0.013 |
| 2     |        |               | 33,141   | 68.4%      |         |       |

|   |        |                           |        |       |       |       |
|---|--------|---------------------------|--------|-------|-------|-------|
| 1 | 2135-2 | Hispanic or Latino        | 4,114  | 8.5%  | 0.525 | 0.004 |
| 2 |        |                           | 4,059  | 8.4%  |       |       |
| 1 | 2054-5 | Black or African American | 6,222  | 12.8% | 0.001 | 0.021 |
| 2 |        |                           | 5,889  | 12.2% |       |       |
| 1 | M      | Male                      | 20,567 | 42.5% | 0.042 | 0.013 |
| 2 |        |                           | 20,255 | 41.8% |       |       |
| 1 | 2028-9 | Asian                     | 1,196  | 2.5%  | 0.003 | 0.019 |
| 2 |        |                           | 1,055  | 2.2%  |       |       |

### Diagnosis

| Group |        |                                                                                               | Mean ± SD | Patients | % of Group | P-Value | SMD    |
|-------|--------|-----------------------------------------------------------------------------------------------|-----------|----------|------------|---------|--------|
| 1     | Z55-   | Persons with potential health hazards related to socioeconomic and psychosocial circumstances |           | 676      | 1.4%       | 0.004   | 0.019  |
| 2     | Z65    |                                                                                               |           | 574      | 1.2%       |         |        |
| 1     | E66    | Overweight and obesity                                                                        |           | 17,989   | 37.1%      | 0.942   | <0.001 |
| 2     |        |                                                                                               |           | 17,978   | 37.1%      |         |        |
| 1     | Z68.3  | Body mass index [BMI] 30-39, adult                                                            |           | 4,050    | 8.4%       | <0.001  | 0.029  |
| 2     |        |                                                                                               |           | 3,670    | 7.6%       |         |        |
| 1     | Z68.4  | Body mass index [BMI] 40 or greater, adult                                                    |           | 3,782    | 7.8%       | <0.001  | 0.032  |
| 2     |        |                                                                                               |           | 3,380    | 7.0%       |         |        |
| 1     | Z68.25 | Body mass index [BMI] 25.0-25.9, adult                                                        |           | 156      | 0.3%       | 0.293   | 0.007  |
| 2     |        |                                                                                               |           | 138      | 0.3%       |         |        |
| 1     | Z68.26 | Body mass index [BMI] 26.0-26.9, adult                                                        |           | 171      | 0.4%       | 0.345   | 0.006  |
| 2     |        |                                                                                               |           | 154      | 0.3%       |         |        |
| 1     | Z68.27 | Body mass index [BMI] 27.0-27.9, adult                                                        |           | 282      | 0.6%       | 0.019   | 0.015  |
| 2     |        |                                                                                               |           | 229      | 0.5%       |         |        |
| 1     | Z68.28 | Body mass index [BMI] 28.0-28.9, adult                                                        |           | 332      | 0.7%       | 0.302   | 0.007  |
| 2     |        |                                                                                               |           | 306      | 0.6%       |         |        |
| 1     | Z68.29 | Body mass index [BMI] 29.0-29.9, adult                                                        |           | 386      | 0.8%       | 0.027   | 0.014  |
| 2     |        |                                                                                               |           | 327      | 0.7%       |         |        |
| 1     | F10    | Alcohol related disorders                                                                     |           | 563      | 1.2%       | 0.018   | 0.015  |
| 2     |        |                                                                                               |           | 487      | 1.0%       |         |        |

|   |            |                                                                               |        |       |        |        |
|---|------------|-------------------------------------------------------------------------------|--------|-------|--------|--------|
| 1 | Z80        | Family history of primary malignant neoplasm                                  | 1,992  | 4.1%  | 0.009  | 0.017  |
| 2 |            |                                                                               | 1,834  | 3.8%  |        |        |
| 1 | Z15.0      | Genetic susceptibility to malignant neoplasm                                  | 22     | 0.0%  | 0.527  | 0.004  |
| 2 |            |                                                                               | 18     | 0.0%  |        |        |
| 1 | Z12        | Encounter for screening for malignant neoplasms                               | 11,930 | 24.6% | 0.002  | 0.020  |
| 2 |            |                                                                               | 11,522 | 23.8% |        |        |
| 1 | Z85        | Personal history of malignant neoplasm                                        | 1,232  | 2.5%  | 0.003  | 0.019  |
| 2 |            |                                                                               | 1,090  | 2.2%  |        |        |
| 1 | Z98.84     | Bariatric surgery status                                                      | 614    | 1.3%  | 0.795  | 0.002  |
| 2 |            |                                                                               | 605    | 1.2%  |        |        |
| 1 | F17        | Nicotine dependence                                                           | 3,576  | 7.4%  | <0.001 | 0.032  |
| 2 |            |                                                                               | 3,185  | 6.6%  |        |        |
| 1 | E66.0      | Obesity due to excess calories                                                | 8,912  | 18.4% | 0.967  | <0.001 |
| 2 |            |                                                                               | 8,907  | 18.4% |        |        |
| 1 | E66.2      | Morbid (severe) obesity with alveolar hypoventilation                         | 148    | 0.3%  | 0.724  | 0.002  |
| 2 |            |                                                                               | 142    | 0.3%  |        |        |
| 1 | E66.3      | Overweight                                                                    | 976    | 2.0%  | 0.040  | 0.013  |
| 2 |            |                                                                               | 888    | 1.8%  |        |        |
| 1 | E66.8      | Other obesity                                                                 | 220    | 0.5%  | 0.259  | 0.007  |
| 2 |            |                                                                               | 197    | 0.4%  |        |        |
| 1 | E66.9      | Obesity, unspecified                                                          | 13,470 | 27.8% | 0.863  | 0.001  |
| 2 |            |                                                                               | 13,494 | 27.9% |        |        |
| 1 | Z72.0      | Tobacco use                                                                   | 1,044  | 2.2%  | 0.157  | 0.009  |
| 2 |            |                                                                               | 981    | 2.0%  |        |        |
| 1 | Z85.09     | Personal history of malignant neoplasm of other digestive organs              | 10     | 0.0%  | 1      | <0.001 |
| 2 |            |                                                                               | 10     | 0.0%  |        |        |
| 1 | B96.8<br>1 | Helicobacter pylori [H. pylori] as the cause of diseases classified elsewhere | 253    | 0.5%  | 0.253  | 0.007  |
| 2 |            |                                                                               | 228    | 0.5%  |        |        |
| 1 | D13.1      | Benign neoplasm of stomach                                                    | 209    | 0.4%  | 0.039  | 0.013  |
| 2 |            |                                                                               | 169    | 0.3%  |        |        |
| 1 | K31.7      | Polyp of stomach and duodenum                                                 | 259    | 0.5%  | 0.300  | 0.007  |
| 2 |            |                                                                               | 236    | 0.5%  |        |        |
| 1 | D51.0      | Vitamin B12 deficiency anemia                                                 | 139    | 0.3%  | 0.088  | 0.011  |
| 2 |            |                                                                               | 112    | 0.2%  |        |        |

|                   |       |                                                          |           |          |            |         |        |
|-------------------|-------|----------------------------------------------------------|-----------|----------|------------|---------|--------|
|                   |       | due to intrinsic factor deficiency                       |           |          |            |         |        |
| 1                 | Z80.0 | Family history of malignant neoplasm of digestive organs | 763       | 1.6%     | 0.047      | 0.013   |        |
| 2                 |       |                                                          | 688       | 1.4%     |            |         |        |
| 1                 | D83   | Common variable immunodeficiency                         | 18        | 0.0%     | 0.601      | 0.003   |        |
| 2                 |       |                                                          | 15        | 0.0%     |            |         |        |
| 1                 | B27   | Infectious mononucleosis                                 | 44        | 0.1%     | 0.753      | 0.002   |        |
| 2                 |       |                                                          | 47        | 0.1%     |            |         |        |
| <b>Procedure</b>  |       |                                                          |           |          |            |         |        |
|                   | Group |                                                          | Mean ± SD | Patients | % of Group | P-Value | SMD    |
| 1                 | 10073 | Excision Procedures on the Stomach                       |           | 10       | 0.0%       | 1       | <0.001 |
| 2                 | 52    |                                                          |           | 10       | 0.0%       |         |        |
| <b>Medication</b> |       |                                                          |           |          |            |         |        |
|                   | Group |                                                          | Mean ± SD | Patients | % of Group | P-Value | SMD    |
| 1                 | A10B  | Biguanides                                               |           | 26,543   | 54.8%      | 0.012   | 0.016  |
| 2                 | A     |                                                          |           | 26,933   | 55.6%      |         |        |
| 1                 | A10B  | Sulfonylureas                                            |           | 13,757   | 28.4%      | 0.015   | 0.016  |
| 2                 | B     |                                                          |           | 14,099   | 29.1%      |         |        |
| 1                 | A10B  | Alpha glucosidase inhibitors                             |           | 222      | 0.5%       | 0.140   | 0.009  |
| 2                 | F     |                                                          |           | 192      | 0.4%       |         |        |
| 1                 | A10B  | Thiazolidinediones                                       |           | 4,018    | 8.3%       | 0.261   | 0.007  |
| 2                 | G     |                                                          |           | 4,115    | 8.5%       |         |        |
| 1                 | A10B  | Dipeptidyl peptidase 4 (DPP-4) inhibitors                |           | 9,089    | 18.8%      | 0.349   | 0.006  |
| 2                 | H     |                                                          |           | 9,203    | 19.0%      |         |        |
| 1                 | A10B  | Sodium-glucose co-transporter 2 (SGLT2) inhibitors       |           | 4,303    | 8.9%       | <0.001  | 0.036  |
| 2                 | K     |                                                          |           | 3,823    | 7.9%       |         |        |
| 1                 | A10B  | Other blood glucose lowering drugs, excl. insulins       |           | 606      | 1.3%       | 0.502   | 0.004  |
| 2                 | X     |                                                          |           | 583      | 1.2%       |         |        |

**eTable 7.** Characteristics of the GLP-1RA/no insulin group and insulin/no GLP-1RA group before and after matched for covariates related to kidney cancer for the study populations of patients with T2D and no history of any OAC

| <b>Group 1 (N = 48,983) and group 2 (N = 1,044,745) characteristics before propensity score matching</b> |        |                                           |           |            |         |       |
|----------------------------------------------------------------------------------------------------------|--------|-------------------------------------------|-----------|------------|---------|-------|
| <b>Demographics</b>                                                                                      |        |                                           |           |            |         |       |
| Group                                                                                                    |        | Mean ± SD                                 | Patients  | % of Group | P-Value | SMD   |
| 1                                                                                                        | AI     | Age at Index                              | 48,983    | 100%       | <0.00   | 0.420 |
| 2                                                                                                        |        |                                           | 1,044,745 | 100%       | 1       |       |
| 1                                                                                                        | 2106-3 | White                                     | 32,592    | 66.5%      | <0.00   | 0.122 |
| 2                                                                                                        |        |                                           | 633,989   | 60.7%      | 1       |       |
| 1                                                                                                        | 1002-5 | American Indian or Alaska Native          | 199       | 0.4%       | 0.004   | 0.013 |
| 2                                                                                                        |        |                                           | 3,443     | 0.3%       |         |       |
| 1                                                                                                        | UNK    | Unknown Race                              | 7,099     | 14.5%      | <0.00   | 0.025 |
| 2                                                                                                        |        |                                           | 142,470   | 13.6%      | 1       |       |
| 1                                                                                                        | F      | Female                                    | 26,011    | 53.1%      | <0.00   | 0.151 |
| 2                                                                                                        |        |                                           | 476,110   | 45.6%      | 1       |       |
| 1                                                                                                        | 2076-8 | Native Hawaiian or Other Pacific Islander | 205       | 0.4%       | <0.00   | 0.071 |
| 2                                                                                                        |        |                                           | 10,677    | 1.0%       | 1       |       |
| 1                                                                                                        | UN     | Unknown Gender                            | 2,252     | 4.6%       | <0.00   | 0.106 |
| 2                                                                                                        |        |                                           | 27,321    | 2.6%       | 1       |       |
| 1                                                                                                        | 2186-5 | Not Hispanic or Latino                    | 33,188    | 67.8%      | <0.00   | 0.098 |
| 2                                                                                                        |        |                                           | 659,375   | 63.1%      | 1       |       |
| 1                                                                                                        | 2135-2 | Hispanic or Latino                        | 4,151     | 8.5%       | <0.00   | 0.019 |
| 2                                                                                                        |        |                                           | 94,136    | 9.0%       | 1       |       |
| 1                                                                                                        | 2054-5 | Black or African American                 | 6,265     | 12.8%      | <0.00   | 0.120 |
| 2                                                                                                        |        |                                           | 178,267   | 17.1%      | 1       |       |
| 1                                                                                                        | M      | Male                                      | 20,720    | 42.3%      | <0.00   | 0.191 |
| 2                                                                                                        |        |                                           | 541,314   | 51.8%      | 1       |       |
| 1                                                                                                        | 2028-9 | Asian                                     | 1,204     | 2.5%       | <0.00   | 0.087 |
| 2                                                                                                        |        |                                           | 41,822    | 4.0%       | 1       |       |
| <b>Diagnosis</b>                                                                                         |        |                                           |           |            |         |       |
| Group                                                                                                    |        | Mean ± SD                                 | Patients  | % of Group | P-Value | SMD   |
| 1                                                                                                        | Z55-   | Persons with potential health             | 686       | 1.4%       | <0.00   | 0.022 |
| 2                                                                                                        | Z65    | hazards related to socioeconomic and      | 12,021    | 1.2%       | 1       |       |

|   |        | psychosocial<br>circumstances                         |         |       |       |        |
|---|--------|-------------------------------------------------------|---------|-------|-------|--------|
| 1 | E66    | Overweight and<br>obesity                             | 18,401  | 37.6% | <0.00 | 0.504  |
| 2 |        |                                                       | 166,445 | 15.9% | 1     |        |
| 1 | Z68.3  | Body mass index<br>[BMI] 30-39, adult                 | 4,204   | 8.6%  | <0.00 | 0.183  |
| 2 |        |                                                       | 43,128  | 4.1%  | 1     |        |
| 1 | Z68.4  | Body mass index<br>[BMI] 40 or greater,<br>adult      | 3,886   | 7.9%  | <0.00 | 0.208  |
| 2 |        |                                                       | 33,396  | 3.2%  | 1     |        |
| 1 | Z68.25 | Body mass index<br>[BMI] 25.0-25.9,<br>adult          | 157     | 0.3%  | 0.563 | 0.003  |
| 2 |        |                                                       | 3,510   | 0.3%  |       |        |
| 1 | Z68.26 | Body mass index<br>[BMI] 26.0-26.9,<br>adult          | 171     | 0.3%  | 0.957 | <0.001 |
| 2 |        |                                                       | 3,632   | 0.3%  |       |        |
| 1 | Z68.27 | Body mass index<br>[BMI] 27.0-27.9,<br>adult          | 288     | 0.6%  | <0.00 | 0.026  |
| 2 |        |                                                       | 4,209   | 0.4%  | 1     |        |
| 1 | Z68.28 | Body mass index<br>[BMI] 28.0-28.9,<br>adult          | 344     | 0.7%  | <0.00 | 0.036  |
| 2 |        |                                                       | 4,508   | 0.4%  | 1     |        |
| 1 | Z68.29 | Body mass index<br>[BMI] 29.0-29.9,<br>adult          | 398     | 0.8%  | <0.00 | 0.044  |
| 2 |        |                                                       | 4,843   | 0.5%  | 1     |        |
| 1 | Z80    | Family history of<br>primary malignant<br>neoplasm    | 2,042   | 4.2%  | <0.00 | 0.136  |
| 2 |        |                                                       | 19,398  | 1.9%  | 1     |        |
| 1 | Z15.0  | Genetic<br>susceptibility to<br>malignant neoplasm    | 24      | 0.0%  | <0.00 | 0.019  |
| 2 |        |                                                       | 156     | 0.0%  | 1     |        |
| 1 | Z12    | Encounter for<br>screening for<br>malignant neoplasms | 12,272  | 25.1% | <0.00 | 0.402  |
| 2 |        |                                                       | 105,217 | 10.1% | 1     |        |
| 1 | Z85    | Personal history of<br>malignant neoplasm             | 1,239   | 2.5%  | <0.00 | 0.066  |
| 2 |        |                                                       | 38,294  | 3.7%  | 1     |        |
| 1 | Z98.84 | Bariatric surgery<br>status                           | 632     | 1.3%  | <0.00 | 0.085  |
| 2 |        |                                                       | 5,136   | 0.5%  | 1     |        |
| 1 | I10    | Essential (primary)<br>hypertension                   | 29,049  | 59.3% | <0.00 | 0.218  |
| 2 |        |                                                       | 506,936 | 48.5% | 1     |        |
| 1 | F17    | Nicotine dependence                                   | 3,593   | 7.3%  | <0.00 | 0.070  |
| 2 |        |                                                       | 96,860  | 9.3%  | 1     |        |

|   |   |             |                                                       |         |       |       |       |
|---|---|-------------|-------------------------------------------------------|---------|-------|-------|-------|
| 1 | 2 | E66.0       | Obesity due to excess calories                        | 9,157   | 18.7% | <0.00 | 0.366 |
|   |   |             |                                                       | 69,998  | 6.7%  | 1     |       |
| 1 | 2 | E66.2       | Morbid (severe) obesity with alveolar hypoventilation | 150     | 0.3%  | 0.118 | 0.007 |
|   |   |             |                                                       | 3,643   | 0.3%  |       |       |
| 1 | 2 | E66.3       | Overweight                                            | 1,010   | 2.1%  | <0.00 | 0.122 |
|   |   |             |                                                       | 6,796   | 0.7%  | 1     |       |
| 1 | 2 | E66.8       | Other obesity                                         | 235     | 0.5%  | <0.00 | 0.065 |
|   |   |             |                                                       | 1,298   | 0.1%  | 1     |       |
| 1 | 2 | E66.9       | Obesity, unspecified                                  | 13,805  | 28.2% | <0.00 | 0.433 |
|   |   |             |                                                       | 118,555 | 11.3% | 1     |       |
| 1 | 2 | Z72.0       | Tobacco use                                           | 1,064   | 2.2%  | <0.00 | 0.064 |
|   |   |             |                                                       | 13,876  | 1.3%  | 1     |       |
| 1 | 2 | Z80.51      | Family history of malignant neoplasm of kidney        | 18      | 0.0%  | 0.011 | 0.010 |
|   |   |             |                                                       | 207     | 0.0%  |       |       |
| 1 | 2 | N18         | Chronic kidney disease (CKD)                          | 2,631   | 5.4%  | <0.00 | 0.287 |
|   |   |             |                                                       | 143,501 | 13.7% | 1     |       |
| 1 | 2 | N19         | Unspecified kidney failure                            | 98      | 0.2%  | <0.00 | 0.127 |
|   |   |             |                                                       | 13,506  | 1.3%  | 1     |       |
| 1 | 2 | Z99.2       | Dependence on renal dialysis                          | 40      | 0.1%  | <0.00 | 0.174 |
|   |   |             |                                                       | 17,914  | 1.7%  | 1     |       |
| 1 | 2 | N17-<br>N19 | Acute kidney failure and chronic kidney disease       | 3,016   | 6.2%  | <0.00 | 0.368 |
|   |   |             |                                                       | 187,587 | 18.0% | 1     |       |
| 1 | 2 | Q85.8<br>3  | Von Hippel-Lindau syndrome                            | 0       | 0%    | 0.494 | 0.004 |
|   |   |             |                                                       | 10      | 0.0%  |       |       |
| 1 | 2 | Q85.1       | Tuberous sclerosis                                    | 10      | 0.0%  | <0.00 | 0.016 |
|   |   |             |                                                       | 30      | 0.0%  | 1     |       |
| 1 | 2 | D57.1       | Sickle-cell disease without crisis                    | 10      | 0.0%  | 0.004 | 0.016 |
|   |   |             |                                                       | 516     | 0.0%  |       |       |
| 1 | 2 | D30.0       | Benign neoplasm of kidney                             | 31      | 0.1%  | 0.038 | 0.009 |
|   |   |             |                                                       | 451     | 0.0%  |       |       |

### Medication

| Group  | Mean ± SD | Patients | % of Group | P-Value | SMD   |
|--------|-----------|----------|------------|---------|-------|
| 1 A10B |           | 27,075   | 55.3%      | <0.00   | 0.806 |
| 2 A    |           | 199,802  | 19.1%      | 1       |       |
| 1 A10B |           | 14,077   | 28.7%      | <0.00   | 0.424 |
| 2 B    |           | 125,703  | 12.0%      | 1       |       |



|   |      |                                                    |         |       |        |       |
|---|------|----------------------------------------------------|---------|-------|--------|-------|
| 1 | A10B | Alpha glucosidase inhibitors                       | 229     | 0.5%  | <0.001 | 0.054 |
| 2 | F    |                                                    | 1,718   | 0.2%  |        |       |
| 1 | A10B | Thiazolidinediones                                 | 4,107   | 8.4%  | <0.001 | 0.213 |
| 2 | G    |                                                    | 35,435  | 3.4%  |        |       |
| 1 | A10B | Dipeptidyl peptidase 4 (DPP-4) inhibitors          | 9,485   | 19.4% | <0.001 | 0.481 |
| 2 | H    |                                                    | 44,595  | 4.3%  |        |       |
| 1 | A10B | Sodium-glucose co-transporter 2 (SGLT2) inhibitors | 4,808   | 9.8%  | <0.001 | 0.423 |
| 2 | K    |                                                    | 6,447   | 0.6%  |        |       |
| 1 | A10B | Other blood glucose lowering drugs, excl. insulins | 614     | 1.3%  | <0.001 | 0.059 |
| 2 | X    |                                                    | 7,048   | 0.7%  |        |       |
| 1 | 161  | acetaminophen                                      | 13,013  | 26.6% | <0.001 | 0.068 |
| 2 |      |                                                    | 309,279 | 29.6% |        |       |

**Group 1 (N = 48,322) and group 2 (N = 48,322) characteristics after propensity score matching**

**Demographics**

| Group | Mean ± SD     | Patients | % of Group | P-Value | SMD    |
|-------|---------------|----------|------------|---------|--------|
| 1     | 55.9 +/- 11.8 | 48,322   | 100%       | <0.001  | 0.026  |
| 2     | 56.3 +/- 13.7 | 48,322   | 100%       |         |        |
| 1     |               | 32,173   | 66.6%      | <0.001  | 0.039  |
| 2     |               | 33,049   | 68.4%      |         |        |
| 1     |               | 197      | 0.4%       | 1       | <0.001 |
| 2     |               | 197      | 0.4%       |         |        |
| 1     |               | 6,946    | 14.4%      | 0.002   | 0.020  |
| 2     |               | 6,604    | 13.7%      |         |        |
| 1     |               | 25,662   | 53.1%      | 0.004   | 0.019  |
| 2     |               | 26,111   | 54.0%      |         |        |
| 1     |               | 203      | 0.4%       | 0.015   | 0.016  |
| 2     |               | 157      | 0.3%       |         |        |
| 1     |               | 2,143    | 4.4%       | 0.039   | 0.013  |
| 2     |               | 2,013    | 4.2%       |         |        |
| 1     |               | 32,743   | 67.8%      | 0.012   | 0.016  |
| 2     |               | 33,107   | 68.5%      |         |        |
| 1     |               | 4,109    | 8.5%       | 0.431   | 0.005  |
| 2     |               | 4,041    | 8.4%       |         |        |
| 1     |               | 6,204    | 12.8%      | 0.003   | 0.019  |
| 2     |               | 5,901    | 12.2%      |         |        |

| 1                |        |                                                                                               | 20,517    | 42.5%    |            |         |        |
|------------------|--------|-----------------------------------------------------------------------------------------------|-----------|----------|------------|---------|--------|
| 2                | M      | Male                                                                                          | 20,198    | 41.8%    | 0.038      | 0.013   |        |
| 1                |        |                                                                                               | 1,193     | 2.5%     |            |         |        |
| 2                | 2028-9 | Asian                                                                                         | 1,036     | 2.1%     | 0.001      | 0.022   |        |
| <b>Diagnosis</b> |        |                                                                                               |           |          |            |         |        |
| Group            |        |                                                                                               | Mean ± SD | Patients | % of Group | P-Value | SMD    |
| 1                | Z55-   | Persons with potential health hazards related to socioeconomic and psychosocial circumstances |           | 675      | 1.4%       | 0.049   | 0.013  |
| 2                | Z65    |                                                                                               |           | 605      | 1.3%       |         |        |
| 1                | E66    | Overweight and obesity                                                                        |           | 17,884   | 37.0%      | 0.947   | <0.001 |
| 2                |        |                                                                                               |           | 17,874   | 37.0%      |         |        |
| 1                | Z68.3  | Body mass index [BMI] 30-39, adult                                                            |           | 4,013    | 8.3%       | 0.001   | 0.021  |
| 2                |        |                                                                                               |           | 3,732    | 7.7%       |         |        |
| 1                | Z68.4  | Body mass index [BMI] 40 or greater, adult                                                    |           | 3,743    | 7.7%       | <0.001  | 0.028  |
| 2                |        |                                                                                               |           | 3,394    | 7.0%       |         |        |
| 1                | Z68.25 | Body mass index [BMI] 25.0-25.9, adult                                                        |           | 155      | 0.3%       | 0.320   | 0.006  |
| 2                |        |                                                                                               |           | 138      | 0.3%       |         |        |
| 1                | Z68.26 | Body mass index [BMI] 26.0-26.9, adult                                                        |           | 170      | 0.4%       | 0.158   | 0.009  |
| 2                |        |                                                                                               |           | 145      | 0.3%       |         |        |
| 1                | Z68.27 | Body mass index [BMI] 27.0-27.9, adult                                                        |           | 278      | 0.6%       | 0.077   | 0.011  |
| 2                |        |                                                                                               |           | 238      | 0.5%       |         |        |
| 1                | Z68.28 | Body mass index [BMI] 28.0-28.9, adult                                                        |           | 327      | 0.7%       | 0.969   | <0.001 |
| 2                |        |                                                                                               |           | 328      | 0.7%       |         |        |
| 1                | Z68.29 | Body mass index [BMI] 29.0-29.9, adult                                                        |           | 382      | 0.8%       | 0.180   | 0.009  |
| 2                |        |                                                                                               |           | 346      | 0.7%       |         |        |
| 1                | Z80    | Family history of primary malignant neoplasm                                                  |           | 1,969    | 4.1%       | 0.078   | 0.011  |
| 2                |        |                                                                                               |           | 1,862    | 3.9%       |         |        |
| 1                | Z15.0  | Genetic susceptibility to malignant neoplasm                                                  |           | 22       | 0.0%       | 0.250   | 0.007  |
| 2                |        |                                                                                               |           | 15       | 0.0%       |         |        |

|   |        |                                                       |        |       |       |        |
|---|--------|-------------------------------------------------------|--------|-------|-------|--------|
| 1 | Z12    | Encounter for screening for malignant neoplasms       | 11,859 | 24.5% | 0.003 | 0.019  |
| 2 |        |                                                       | 11,466 | 23.7% |       |        |
| 1 | Z85    | Personal history of malignant neoplasm                | 1,223  | 2.5%  | 0.010 | 0.017  |
| 2 |        |                                                       | 1,100  | 2.3%  |       |        |
| 1 | Z98.84 | Bariatric surgery status                              | 615    | 1.3%  | 0.469 | 0.005  |
| 2 |        |                                                       | 590    | 1.2%  |       |        |
| 1 | I10    | Essential (primary) hypertension                      | 28,525 | 59.0% | 0.647 | 0.003  |
| 2 |        |                                                       | 28,455 | 58.9% |       |        |
| 1 | F17    | Nicotine dependence                                   | 3,567  | 7.4%  | <0.00 | 0.031  |
| 2 |        |                                                       | 3,184  | 6.6%  | 1     |        |
| 1 | E66.0  | Obesity due to excess calories                        | 8,844  | 18.3% | 0.139 | 0.010  |
| 2 |        |                                                       | 8,667  | 17.9% |       |        |
| 1 | E66.2  | Morbid (severe) obesity with alveolar hypoventilation | 145    | 0.3%  | 0.303 | 0.007  |
| 2 |        |                                                       | 128    | 0.3%  |       |        |
| 1 | E66.3  | Overweight                                            | 966    | 2.0%  | 0.010 | 0.017  |
| 2 |        |                                                       | 857    | 1.8%  |       |        |
| 1 | E66.8  | Other obesity                                         | 224    | 0.5%  | 0.156 | 0.009  |
| 2 |        |                                                       | 195    | 0.4%  |       |        |
| 1 | E66.9  | Obesity, unspecified                                  | 13,394 | 27.7% | 0.199 | 0.008  |
| 2 |        |                                                       | 13,573 | 28.1% |       |        |
| 1 | Z72.0  | Tobacco use                                           | 1,042  | 2.2%  | 0.012 | 0.016  |
| 2 |        |                                                       | 932    | 1.9%  |       |        |
| 1 | Z80.51 | Family history of malignant neoplasm of kidney        | 17     | 0.0%  | 0.724 | 0.002  |
| 2 |        |                                                       | 15     | 0.0%  |       |        |
| 1 | N18    | Chronic kidney disease (CKD)                          | 2,624  | 5.4%  | <0.00 | 0.035  |
| 2 |        |                                                       | 2,256  | 4.7%  | 1     |        |
| 1 | N19    | Unspecified kidney failure                            | 98     | 0.2%  | 0.056 | 0.012  |
| 2 |        |                                                       | 73     | 0.2%  |       |        |
| 1 | Z99.2  | Dependence on renal dialysis                          | 40     | 0.1%  | 0.564 | 0.004  |
| 2 |        |                                                       | 35     | 0.1%  |       |        |
| 1 | N17-   | Acute kidney failure and chronic kidney disease       | 3,009  | 6.2%  | <0.00 | 0.041  |
| 2 | N19    |                                                       | 2,548  | 5.3%  | 1     |        |
| 1 | Q85.8  | Von Hippel-Lindau syndrome                            | 0      | 0%    | --    | --     |
| 2 | 3      |                                                       | 0      | 0%    |       |        |
| 1 | Q85.1  | Tuberous sclerosis                                    | 10     | 0.0%  | 1     | <0.001 |
| 2 |        |                                                       | 10     | 0.0%  |       |        |
| 1 | D57.1  | Sickle-cell disease without crisis                    | 10     | 0.0%  | 0.827 | 0.001  |
| 2 |        |                                                       | 11     | 0.0%  |       |        |

|                   |       |                                                    |           |          |            |         |       |
|-------------------|-------|----------------------------------------------------|-----------|----------|------------|---------|-------|
| 1                 | D30.0 | Benign neoplasm of kidney                          |           | 31       | 0.1%       | 0.276   | 0.007 |
| 2                 |       |                                                    |           | 23       | 0.0%       |         |       |
| <b>Medication</b> |       |                                                    |           |          |            |         |       |
| Group             |       |                                                    | Mean ± SD | Patients | % of Group | P-Value | SMD   |
| 1                 | A10B  | Biguanides                                         |           | 26,421   | 54.7%      | 0.046   | 0.013 |
| 2                 | A     |                                                    |           | 26,729   | 55.3%      |         |       |
| 1                 | A10B  | Sulfonylureas                                      |           | 13,668   | 28.3%      | 0.014   | 0.016 |
| 2                 | B     |                                                    |           | 14,012   | 29.0%      |         |       |
| 1                 | A10B  | Alpha glucosidase inhibitors                       |           | 220      | 0.5%       | 0.328   | 0.006 |
| 2                 | F     |                                                    |           | 200      | 0.4%       |         |       |
| 1                 | A10B  | Thiazolidinediones                                 |           | 4,005    | 8.3%       | 0.771   | 0.002 |
| 2                 | G     |                                                    |           | 4,030    | 8.3%       |         |       |
| 1                 | A10B  | Dipeptidyl peptidase 4 (DPP-4) inhibitors          |           | 9,006    | 18.6%      | 0.661   | 0.003 |
| 2                 | H     |                                                    |           | 8,953    | 18.5%      |         |       |
| 1                 | A10B  | Sodium-glucose co-transporter 2 (SGLT2) inhibitors |           | 4,203    | 8.7%       | <0.001  | 0.047 |
| 2                 | K     |                                                    |           | 3,583    | 7.4%       |         |       |
| 1                 | A10B  | Other blood glucose lowering drugs, excl. insulins |           | 603      | 1.2%       | 0.931   | 0.001 |
| 2                 | X     |                                                    |           | 606      | 1.3%       |         |       |
| 1                 | 161   | acetaminophen                                      |           | 12,902   | 26.7%      | <0.001  | 0.027 |
| 2                 |       |                                                    |           | 12,334   | 25.5%      |         |       |

**eTable 8.** Characteristics of the GLP-1RA/no insulin group and insulin/no GLP-1RA group before and after matched for covariates related to liver cancer for the study populations of patients with T2D and no history of any OAC

| <b>Group 1 (N = 48,983) and group 2 (N = 1,044,745) characteristics before propensity score matching</b> |        |                                           |           |            |         |       |
|----------------------------------------------------------------------------------------------------------|--------|-------------------------------------------|-----------|------------|---------|-------|
| <b>Demographics</b>                                                                                      |        |                                           |           |            |         |       |
| Group                                                                                                    |        | Mean ± SD                                 | Patients  | % of Group | P-Value | SMD   |
| 1                                                                                                        | AI     | Age at Index                              | 48,983    | 100%       | <0.00   | 0.420 |
| 2                                                                                                        |        |                                           | 1,044,745 | 100%       | 1       |       |
| 1                                                                                                        | 2106-3 | White                                     | 32,592    | 66.5%      | <0.00   | 0.122 |
| 2                                                                                                        |        |                                           | 633,989   | 60.7%      | 1       |       |
| 1                                                                                                        | 1002-5 | American Indian or Alaska Native          | 199       | 0.4%       | 0.004   | 0.013 |
| 2                                                                                                        |        |                                           | 3,443     | 0.3%       |         |       |
| 1                                                                                                        | UNK    | Unknown Race                              | 7,099     | 14.5%      | <0.00   | 0.025 |
| 2                                                                                                        |        |                                           | 142,470   | 13.6%      | 1       |       |
| 1                                                                                                        | F      | Female                                    | 26,011    | 53.1%      | <0.00   | 0.151 |
| 2                                                                                                        |        |                                           | 476,110   | 45.6%      | 1       |       |
| 1                                                                                                        | 2076-8 | Native Hawaiian or Other Pacific Islander | 205       | 0.4%       | <0.00   | 0.071 |
| 2                                                                                                        |        |                                           | 10,677    | 1.0%       | 1       |       |
| 1                                                                                                        | UN     | Unknown Gender                            | 2,252     | 4.6%       | <0.00   | 0.106 |
| 2                                                                                                        |        |                                           | 27,321    | 2.6%       | 1       |       |
| 1                                                                                                        | 2186-5 | Not Hispanic or Latino                    | 33,188    | 67.8%      | <0.00   | 0.098 |
| 2                                                                                                        |        |                                           | 659,375   | 63.1%      | 1       |       |
| 1                                                                                                        | 2135-2 | Hispanic or Latino                        | 4,151     | 8.5%       | <0.00   | 0.019 |
| 2                                                                                                        |        |                                           | 94,136    | 9.0%       | 1       |       |
| 1                                                                                                        | 2054-5 | Black or African American                 | 6,265     | 12.8%      | <0.00   | 0.120 |
| 2                                                                                                        |        |                                           | 178,267   | 17.1%      | 1       |       |
| 1                                                                                                        | M      | Male                                      | 20,720    | 42.3%      | <0.00   | 0.191 |
| 2                                                                                                        |        |                                           | 541,314   | 51.8%      | 1       |       |
| 1                                                                                                        | 2028-9 | Asian                                     | 1,204     | 2.5%       | <0.00   | 0.087 |
| 2                                                                                                        |        |                                           | 41,822    | 4.0%       | 1       |       |
| <b>Diagnosis</b>                                                                                         |        |                                           |           |            |         |       |
| Group                                                                                                    |        | Mean ± SD                                 | Patients  | % of Group | P-Value | SMD   |
| 1                                                                                                        | Z55-   | Persons with potential health             | 686       | 1.4%       | <0.00   | 0.022 |
| 2                                                                                                        | Z65    | hazards related to socioeconomic and      | 12,021    | 1.2%       | 1       |       |

|   |        | psychosocial<br>circumstances                   |         |       |       |        |
|---|--------|-------------------------------------------------|---------|-------|-------|--------|
| 1 | E66    | Overweight and obesity                          | 18,401  | 37.6% | <0.00 | 0.504  |
| 2 |        |                                                 | 166,445 | 15.9% | 1     |        |
| 1 | Z68.3  | Body mass index [BMI] 30-39, adult              | 4,204   | 8.6%  | <0.00 | 0.183  |
| 2 |        |                                                 | 43,128  | 4.1%  | 1     |        |
| 1 | Z68.4  | Body mass index [BMI] 40 or greater, adult      | 3,886   | 7.9%  | <0.00 | 0.208  |
| 2 |        |                                                 | 33,396  | 3.2%  | 1     |        |
| 1 | Z68.25 | Body mass index [BMI] 25.0-25.9, adult          | 157     | 0.3%  | 0.563 | 0.003  |
| 2 |        |                                                 | 3,510   | 0.3%  |       |        |
| 1 | Z68.26 | Body mass index [BMI] 26.0-26.9, adult          | 171     | 0.3%  | 0.957 | <0.001 |
| 2 |        |                                                 | 3,632   | 0.3%  |       |        |
| 1 | Z68.27 | Body mass index [BMI] 27.0-27.9, adult          | 288     | 0.6%  | <0.00 | 0.026  |
| 2 |        |                                                 | 4,209   | 0.4%  | 1     |        |
| 1 | Z68.28 | Body mass index [BMI] 28.0-28.9, adult          | 344     | 0.7%  | <0.00 | 0.036  |
| 2 |        |                                                 | 4,508   | 0.4%  | 1     |        |
| 1 | Z68.29 | Body mass index [BMI] 29.0-29.9, adult          | 398     | 0.8%  | <0.00 | 0.044  |
| 2 |        |                                                 | 4,843   | 0.5%  | 1     |        |
| 1 | F10    | Alcohol related disorders                       | 563     | 1.1%  | <0.00 | 0.115  |
| 2 |        |                                                 | 28,538  | 2.7%  | 1     |        |
| 1 | Z80    | Family history of primary malignant neoplasm    | 2,042   | 4.2%  | <0.00 | 0.136  |
| 2 |        |                                                 | 19,398  | 1.9%  | 1     |        |
| 1 | Z15.0  | Genetic susceptibility to malignant neoplasm    | 24      | 0.0%  | <0.00 | 0.019  |
| 2 |        |                                                 | 156     | 0.0%  | 1     |        |
| 1 | Z12    | Encounter for screening for malignant neoplasms | 12,272  | 25.1% | <0.00 | 0.402  |
| 2 |        |                                                 | 105,217 | 10.1% | 1     |        |
| 1 | Z85    | Personal history of malignant neoplasm          | 1,239   | 2.5%  | <0.00 | 0.066  |
| 2 |        |                                                 | 38,294  | 3.7%  | 1     |        |
| 1 | Z98.84 | Bariatric surgery status                        | 632     | 1.3%  | <0.00 | 0.085  |
| 2 |        |                                                 | 5,136   | 0.5%  | 1     |        |
| 1 | E88.81 | Metabolic syndrome and other insulin resistance | 1,536   | 3.1%  | <0.00 | 0.182  |
| 2 |        |                                                 | 6,923   | 0.7%  | 1     |        |

|   |        |                                                          |         |       |       |       |
|---|--------|----------------------------------------------------------|---------|-------|-------|-------|
| 1 | E78    | Disorders of lipoprotein metabolism and other lipidemias | 28,438  | 58.1% | <0.00 | 0.404 |
| 2 |        |                                                          | 399,702 | 38.3% | 1     |       |
| 1 | I10    | Essential (primary) hypertension                         | 29,049  | 59.3% | <0.00 | 0.218 |
| 2 |        |                                                          | 506,936 | 48.5% | 1     |       |
| 1 | K75.8  | Nonalcoholic steatohepatitis (NASH)                      | 475     | 1.0%  | <0.00 | 0.082 |
| 2 | 1      |                                                          | 3,277   | 0.3%  | 1     |       |
| 1 | F17    | Nicotine dependence                                      | 3,593   | 7.3%  | <0.00 | 0.070 |
| 2 |        |                                                          | 96,860  | 9.3%  | 1     |       |
| 1 | E66.0  | Obesity due to excess calories                           | 9,157   | 18.7% | <0.00 | 0.366 |
| 2 |        |                                                          | 69,998  | 6.7%  | 1     |       |
| 1 | E66.2  | Morbid (severe) obesity with alveolar hypoventilation    | 150     | 0.3%  | 0.118 | 0.007 |
| 2 |        |                                                          | 3,643   | 0.3%  |       |       |
| 1 | E66.3  | Overweight                                               | 1,010   | 2.1%  | <0.00 | 0.122 |
| 2 |        |                                                          | 6,796   | 0.7%  | 1     |       |
| 1 | E66.8  | Other obesity                                            | 235     | 0.5%  | <0.00 | 0.065 |
| 2 |        |                                                          | 1,298   | 0.1%  | 1     |       |
| 1 | E66.9  | Obesity, unspecified                                     | 13,805  | 28.2% | <0.00 | 0.433 |
| 2 |        |                                                          | 118,555 | 11.3% | 1     |       |
| 1 | Z72.0  | Tobacco use                                              | 1,064   | 2.2%  | <0.00 | 0.064 |
| 2 |        |                                                          | 13,876  | 1.3%  | 1     |       |
| 1 | B18    | Chronic viral hepatitis                                  | 260     | 0.5%  | <0.00 | 0.075 |
| 2 |        |                                                          | 12,879  | 1.2%  | 1     |       |
| 1 | K74    | Fibrosis and cirrhosis of liver                          | 433     | 0.9%  | <0.00 | 0.085 |
| 2 |        |                                                          | 19,545  | 1.9%  | 1     |       |
| 1 | K76.0  | Fatty (change of) liver, not elsewhere classified        | 3,131   | 6.4%  | <0.00 | 0.207 |
| 2 |        |                                                          | 23,105  | 2.2%  | 1     |       |
| 1 | K74.3  | Primary biliary cirrhosis                                | 20      | 0.0%  | 0.006 | 0.014 |
| 2 |        |                                                          | 786     | 0.1%  |       |       |
| 1 | E83.11 | Hereditary hemochromatosis                               | 40      | 0.1%  | <0.00 | 0.025 |
| 2 | 0      |                                                          | 251     | 0.0%  | 1     |       |
| 1 | E70.21 | Tyrosinemia                                              | 10      | 0.0%  | <0.00 | 0.013 |
| 2 |        |                                                          | 56      | 0.0%  | 1     |       |
| 1 | E88.01 | Alpha-1-antitrypsin deficiency                           | 16      | 0.0%  | 0.197 | 0.006 |
| 2 |        |                                                          | 245     | 0.0%  |       |       |
| 1 | E80.1  | Porphyria cutanea tarda                                  | 10      | 0.0%  | <0.00 | 0.017 |
| 2 |        |                                                          | 27      | 0.0%  | 1     |       |

|   |        |                                                                 |     |      |       |       |
|---|--------|-----------------------------------------------------------------|-----|------|-------|-------|
| 1 | E74.0  | Glycogen storage disease                                        | 10  | 0.0% | 0.227 | 0.005 |
| 2 |        |                                                                 | 144 | 0.0% |       |       |
| 1 | E83.00 | Disorder of copper metabolism, unspecified                      | 10  | 0.0% | 0.018 | 0.009 |
| 2 |        |                                                                 | 99  | 0.0% |       |       |
| 1 | T64    | Toxic effect of aflatoxin and other mycotoxin food contaminants | 10  | 0.0% | 0.554 | 0.003 |
| 2 |        |                                                                 | 176 | 0.0% |       |       |
| 1 | D13.4  | Benign neoplasm of liver                                        | 35  | 0.1% | 0.002 | 0.013 |
| 2 |        |                                                                 | 434 | 0.0% |       |       |

### Medication

| Group |      | Mean ± SD | Patients | % of Group | P-Value | SMD   |
|-------|------|-----------|----------|------------|---------|-------|
| 1     | A10B |           | 27,075   | 55.3%      | <0.00   |       |
| 2     | A    |           | 199,802  | 19.1%      | 1       | 0.806 |
| 1     | A10B |           | 14,077   | 28.7%      | <0.00   |       |
| 2     | B    |           | 125,703  | 12.0%      | 1       | 0.424 |
| 1     | A10B |           | 229      | 0.5%       | <0.00   |       |
| 2     | F    |           | 1,718    | 0.2%       | 1       | 0.054 |
| 1     | A10B |           | 4,107    | 8.4%       | <0.00   |       |
| 2     | G    |           | 35,435   | 3.4%       | 1       | 0.213 |
| 1     | A10B |           | 9,485    | 19.4%      | <0.00   |       |
| 2     | H    |           | 44,595   | 4.3%       | 1       | 0.481 |
| 1     | A10B |           | 4,808    | 9.8%       | <0.00   |       |
| 2     | K    |           | 6,447    | 0.6%       | 1       | 0.423 |
| 1     | A10B |           | 614      | 1.3%       | <0.00   |       |
| 2     | X    |           | 7,048    | 0.7%       | 1       | 0.059 |
| 1     | A14A |           | 60       | 0.1%       | <0.00   |       |
| 2     |      |           | 379      | 0.0%       | 1       | 0.031 |

### Group 1 (N = 48,397) and group 2 (N = 48,397) characteristics after propensity score matching

#### Demographics

| Group |        | Mean ± SD     | Patients | % of Group | P-Value | SMD   |
|-------|--------|---------------|----------|------------|---------|-------|
| 1     | AI     | 55.9 +/- 11.7 | 48,397   | 100%       | 0.004   | 0.018 |
| 2     |        | 56.2 +/- 13.7 | 48,397   | 100%       |         |       |
| 1     | 2106-3 |               | 32,208   | 66.5%      | <0.00   |       |
| 2     |        |               | 33,287   | 68.8%      | 1       | 0.048 |



|   |        |                                           |        |       |       |       |
|---|--------|-------------------------------------------|--------|-------|-------|-------|
| 1 | 1002-5 | American Indian or Alaska Native          | 196    | 0.4%  | 0.191 | 0.008 |
| 2 |        |                                           | 171    | 0.4%  |       |       |
| 1 | UNK    | Unknown Race                              | 6,970  | 14.4% | <0.00 | 0.032 |
| 2 |        |                                           | 6,443  | 13.3% | 1     |       |
| 1 | F      | Female                                    | 25,674 | 53.0% | <0.00 | 0.024 |
| 2 |        |                                           | 26,256 | 54.3% | 1     |       |
| 1 | 2076-8 | Native Hawaiian or Other Pacific Islander | 204    | 0.4%  | 0.088 | 0.011 |
| 2 |        |                                           | 171    | 0.4%  |       |       |
| 1 | UN     | Unknown Gender                            | 2,164  | 4.5%  | <0.00 | 0.029 |
| 2 |        |                                           | 1,881  | 3.9%  | 1     |       |
| 1 | 2186-5 | Not Hispanic or Latino                    | 32,793 | 67.8% | <0.00 | 0.022 |
| 2 |        |                                           | 33,299 | 68.8% | 1     |       |
| 1 | 2135-2 | Hispanic or Latino                        | 4,114  | 8.5%  | 0.042 | 0.013 |
| 2 |        |                                           | 3,939  | 8.1%  |       |       |
| 1 | 2054-5 | Black or African American                 | 6,219  | 12.8% | 0.027 | 0.014 |
| 2 |        |                                           | 5,991  | 12.4% |       |       |
| 1 | M      | Male                                      | 20,559 | 42.5% | 0.052 | 0.013 |
| 2 |        |                                           | 20,260 | 41.9% |       |       |
| 1 | 2028-9 | Asian                                     | 1,193  | 2.5%  | <0.00 | 0.025 |
| 2 |        |                                           | 1,012  | 2.1%  | 1     |       |

### Diagnosis

| Group | Mean ± SD                                                                                     | Patients | % of Group | P-Value | SMD   |
|-------|-----------------------------------------------------------------------------------------------|----------|------------|---------|-------|
| 1     | Persons with potential health hazards related to socioeconomic and psychosocial circumstances | 677      | 1.4%       | 0.088   | 0.011 |
| 2     |                                                                                               | 616      | 1.3%       |         |       |
| 1     | E66                                                                                           | 17,951   | 37.1%      | 0.398   | 0.005 |
| 2     |                                                                                               | 18,078   | 37.4%      |         |       |
| 1     | Z68.3                                                                                         | 4,032    | 8.3%       | <0.00   | 0.028 |
| 2     |                                                                                               | 3,671    | 7.6%       |         |       |
| 1     | Z68.4                                                                                         | 3,768    | 7.8%       | <0.00   | 0.028 |
| 2     |                                                                                               | 3,414    | 7.1%       |         |       |
| 1     | Z68.25                                                                                        | 156      | 0.3%       | 0.109   | 0.010 |
| 2     |                                                                                               | 129      | 0.3%       |         |       |

|   |        |                                                          |        |       |        |       |
|---|--------|----------------------------------------------------------|--------|-------|--------|-------|
| 1 | Z68.26 | Body mass index [BMI] 26.0-26.9, adult                   | 171    | 0.4%  | 0.178  | 0.009 |
| 2 |        |                                                          | 147    | 0.3%  |        |       |
| 1 | Z68.27 | Body mass index [BMI] 27.0-27.9, adult                   | 282    | 0.6%  | 0.048  | 0.013 |
| 2 |        |                                                          | 237    | 0.5%  |        |       |
| 1 | Z68.28 | Body mass index [BMI] 28.0-28.9, adult                   | 331    | 0.7%  | 0.361  | 0.006 |
| 2 |        |                                                          | 308    | 0.6%  |        |       |
| 1 | Z68.29 | Body mass index [BMI] 29.0-29.9, adult                   | 385    | 0.8%  | 0.182  | 0.009 |
| 2 |        |                                                          | 349    | 0.7%  |        |       |
| 1 | F10    | Alcohol related disorders                                | 562    | 1.2%  | <0.001 | 0.026 |
| 2 |        |                                                          | 436    | 0.9%  |        |       |
| 1 | Z80    | Family history of primary malignant neoplasm             | 1,983  | 4.1%  | 0.131  | 0.010 |
| 2 |        |                                                          | 1,891  | 3.9%  |        |       |
| 1 | Z15.0  | Genetic susceptibility to malignant neoplasm             | 22     | 0.0%  | 0.182  | 0.009 |
| 2 |        |                                                          | 14     | 0.0%  |        |       |
| 1 | Z12    | Encounter for screening for malignant neoplasms          | 11,908 | 24.6% | 0.004  | 0.018 |
| 2 |        |                                                          | 11,526 | 23.8% |        |       |
| 1 | Z85    | Personal history of malignant neoplasm                   | 1,229  | 2.5%  | <0.001 | 0.027 |
| 2 |        |                                                          | 1,032  | 2.1%  |        |       |
| 1 | Z98.84 | Bariatric surgery status                                 | 611    | 1.3%  | 0.142  | 0.009 |
| 2 |        |                                                          | 561    | 1.2%  |        |       |
| 1 | E88.81 | Metabolic syndrome and other insulin resistance          | 1,480  | 3.1%  | 0.752  | 0.002 |
| 2 |        |                                                          | 1,497  | 3.1%  |        |       |
| 1 | E78    | Disorders of lipoprotein metabolism and other lipidemias | 27,908 | 57.7% | 0.927  | 0.001 |
| 2 |        |                                                          | 27,922 | 57.7% |        |       |
| 1 | I10    | Essential (primary) hypertension                         | 28,605 | 59.1% | 0.896  | 0.001 |
| 2 |        |                                                          | 28,625 | 59.1% |        |       |
| 1 | K75.81 | Nonalcoholic steatohepatitis (NASH)                      | 445    | 0.9%  | 0.374  | 0.006 |
| 2 |        |                                                          | 419    | 0.9%  |        |       |
| 1 | F17    | Nicotine dependence                                      | 3,568  | 7.4%  | <0.001 | 0.033 |
| 2 |        |                                                          | 3,165  | 6.5%  |        |       |

|   |        |                                                                 |        |       |       |        |
|---|--------|-----------------------------------------------------------------|--------|-------|-------|--------|
| 1 | E66.0  | Obesity due to excess calories                                  | 8,878  | 18.3% | 0.727 | 0.002  |
| 2 |        |                                                                 | 8,836  | 18.3% |       |        |
| 1 | E66.2  | Morbid (severe) obesity with alveolar hypoventilation           | 149    | 0.3%  | 0.230 | 0.008  |
| 2 |        |                                                                 | 129    | 0.3%  |       |        |
| 1 | E66.3  | Overweight                                                      | 975    | 2.0%  | 0.080 | 0.011  |
| 2 |        |                                                                 | 900    | 1.9%  |       |        |
| 1 | E66.8  | Other obesity                                                   | 218    | 0.5%  | 0.378 | 0.006  |
| 2 |        |                                                                 | 200    | 0.4%  |       |        |
| 1 | E66.9  | Obesity, unspecified                                            | 13,442 | 27.8% | 0.057 | 0.012  |
| 2 |        |                                                                 | 13,708 | 28.3% |       |        |
| 1 | Z72.0  | Tobacco use                                                     | 1,039  | 2.1%  | 0.262 | 0.007  |
| 2 |        |                                                                 | 989    | 2.0%  |       |        |
| 1 | B18    | Chronic viral hepatitis                                         | 259    | 0.5%  | 0.030 | 0.014  |
| 2 |        |                                                                 | 212    | 0.4%  |       |        |
| 1 | K74    | Fibrosis and cirrhosis of liver                                 | 428    | 0.9%  | 0.001 | 0.021  |
| 2 |        |                                                                 | 337    | 0.7%  |       |        |
| 1 | K76.0  | Fatty (change of) liver, not elsewhere classified               | 3,006  | 6.2%  | 0.129 | 0.010  |
| 2 |        |                                                                 | 2,893  | 6.0%  |       |        |
| 1 | K74.3  | Primary biliary cirrhosis                                       | 20     | 0.0%  | 0.398 | 0.005  |
| 2 |        |                                                                 | 15     | 0.0%  |       |        |
| 1 | E83.11 | Hereditary hemochromatosis                                      | 39     | 0.1%  | 0.059 | 0.012  |
| 2 | 0      |                                                                 | 24     | 0.0%  |       |        |
| 1 | E70.21 | Tyrosinemia                                                     | 10     | 0.0%  | 1     | <0.001 |
| 2 |        |                                                                 | 10     | 0.0%  |       |        |
| 1 | E88.01 | Alpha-1-antitrypsin deficiency                                  | 16     | 0.0%  | 0.862 | 0.001  |
| 2 |        |                                                                 | 17     | 0.0%  |       |        |
| 1 | E80.1  | Porphyria cutanea tarda                                         | 10     | 0.0%  | 0.002 | 0.020  |
| 2 |        |                                                                 | 0      | 0%    |       |        |
| 1 | E74.0  | Glycogen storage disease                                        | 10     | 0.0%  | 1     | <0.001 |
| 2 |        |                                                                 | 10     | 0.0%  |       |        |
| 1 | E83.00 | Disorder of copper metabolism, unspecified                      | 10     | 0.0%  | 1     | <0.001 |
| 2 |        |                                                                 | 10     | 0.0%  |       |        |
| 1 | T64    | Toxic effect of aflatoxin and other mycotoxin food contaminants | 10     | 0.0%  | 1     | <0.001 |
| 2 |        |                                                                 | 10     | 0.0%  |       |        |
| 1 | D13.4  | Benign neoplasm of liver                                        | 33     | 0.1%  | 0.181 | 0.009  |
| 2 |        |                                                                 | 23     | 0.0%  |       |        |

### Medication

| Group |      | Mean ± SD                                          | Patients | % of Group | P-Value | SMD   |
|-------|------|----------------------------------------------------|----------|------------|---------|-------|
| 1     | A10B |                                                    | 26,497   | 54.7%      | 0.002   | 0.020 |
| 2     | A    | Biguanides                                         | 26,968   | 55.7%      |         |       |
| 1     | A10B |                                                    | 13,741   | 28.4%      | 0.011   | 0.016 |
| 2     | B    | Sulfonylureas                                      | 14,100   | 29.1%      |         |       |
| 1     | A10B |                                                    | 223      | 0.5%       | 0.774   | 0.002 |
| 2     | F    | Alpha glucosidase inhibitors                       | 217      | 0.4%       |         |       |
| 1     | A10B |                                                    | 4,019    | 8.3%       | 0.276   | 0.007 |
| 2     | G    | Thiazolidinediones                                 | 4,113    | 8.5%       |         |       |
| 1     | A10B |                                                    | 9,071    | 18.7%      | 0.559   | 0.004 |
| 2     | H    | Dipeptidyl peptidase 4 (DPP-4) inhibitors          | 9,142    | 18.9%      |         |       |
| 1     | A10B |                                                    | 4,271    | 8.8%       | <0.001  | 0.043 |
| 2     | K    | Sodium-glucose co-transporter 2 (SGLT2) inhibitors | 3,699    | 7.6%       |         |       |
| 1     | A10B |                                                    | 606      | 1.3%       | 0.492   | 0.004 |
| 2     | X    | Other blood glucose lowering drugs, excl. insulins | 630      | 1.3%       |         |       |
| 1     | A14A |                                                    | 59       | 0.1%       | 0.204   | 0.008 |
| 2     | A14A | ANABOLIC STEROIDS                                  | 46       | 0.1%       |         |       |

**eTable 9.** Characteristics of the GLP-1RA/no insulin group and insulin/no GLP-1RA group before and after matched for covariates related to ovarian cancer for the study populations of women with T2D and no history of any OAC

| <b>Group 1 (N = 26,011) and group 2 (N = 476,110) characteristics before propensity score matching</b> |             |                                                                                               |          |            |         |       |
|--------------------------------------------------------------------------------------------------------|-------------|-----------------------------------------------------------------------------------------------|----------|------------|---------|-------|
| <b>Demographics</b>                                                                                    |             |                                                                                               |          |            |         |       |
| Group                                                                                                  |             | Mean ± SD                                                                                     | Patients | % of Group | P-Value | SMD   |
| 1                                                                                                      | AI          | Age at Index                                                                                  | 26,011   | 100%       | <0.00   | 0.469 |
| 2                                                                                                      |             |                                                                                               | 476,110  | 100%       | 1       |       |
| 1                                                                                                      | 2106-3      | White                                                                                         | 17,165   | 66.0%      | <0.00   | 0.138 |
| 2                                                                                                      |             |                                                                                               | 282,423  | 59.3%      | 1       |       |
| 1                                                                                                      | 1002-5      | American Indian or Alaska Native                                                              | 123      | 0.5%       | 0.003   | 0.018 |
| 2                                                                                                      |             |                                                                                               | 1,701    | 0.4%       |         |       |
| 1                                                                                                      | UNK         | Unknown Race                                                                                  | 2,772    | 10.7%      | <0.00   | 0.035 |
| 2                                                                                                      |             |                                                                                               | 55,979   | 11.8%      | 1       |       |
| 1                                                                                                      | 2076-8      | Native Hawaiian or Other Pacific Islander                                                     | 105      | 0.4%       | <0.00   | 0.075 |
| 2                                                                                                      |             |                                                                                               | 4,943    | 1.0%       | 1       |       |
| 1                                                                                                      | UN          | Unknown Ethnicity                                                                             | 5,078    | 19.5%      | <0.00   | 0.156 |
| 2                                                                                                      |             |                                                                                               | 124,092  | 26.1%      | 1       |       |
| 1                                                                                                      | 2186-5      | Not Hispanic or Latino                                                                        | 18,384   | 70.7%      | <0.00   | 0.142 |
| 2                                                                                                      |             |                                                                                               | 304,990  | 64.1%      | 1       |       |
| 1                                                                                                      | 2135-2      | Hispanic or Latino                                                                            | 2,549    | 9.8%       | 0.682   | 0.003 |
| 2                                                                                                      |             |                                                                                               | 47,028   | 9.9%       |         |       |
| 1                                                                                                      | 2054-5      | Black or African American                                                                     | 4,436    | 17.1%      | <0.00   | 0.077 |
| 2                                                                                                      |             |                                                                                               | 95,352   | 20.0%      | 1       |       |
| 1                                                                                                      | 2028-9      | Asian                                                                                         | 619      | 2.4%       | <0.00   | 0.098 |
| 2                                                                                                      |             |                                                                                               | 19,593   | 4.1%       | 1       |       |
| <b>Diagnosis</b>                                                                                       |             |                                                                                               |          |            |         |       |
| Group                                                                                                  |             | Mean ± SD                                                                                     | Patients | % of Group | P-Value | SMD   |
| 1                                                                                                      | Z55-<br>Z65 | Persons with potential health hazards related to socioeconomic and psychosocial circumstances | 468      | 1.8%       | <0.00   | 0.048 |
| 2                                                                                                      |             |                                                                                               | 5,762    | 1.2%       | 1       |       |
| 1                                                                                                      | E66         | Overweight and obesity                                                                        | 10,477   | 40.3%      | <0.00   | 0.493 |
| 2                                                                                                      |             |                                                                                               | 87,968   | 18.5%      | 1       |       |

|   |        |                                                       |        |       |       |       |
|---|--------|-------------------------------------------------------|--------|-------|-------|-------|
| 1 | Z68.3  | Body mass index [BMI] 30-39, adult                    | 1,815  | 7.0%  | <0.00 | 0.146 |
| 2 |        |                                                       | 17,667 | 3.7%  | 1     |       |
| 1 | Z68.4  | Body mass index [BMI] 40 or greater, adult            | 2,154  | 8.3%  | <0.00 | 0.183 |
| 2 |        |                                                       | 18,645 | 3.9%  | 1     |       |
| 1 | Z68.25 | Body mass index [BMI] 25.0-25.9, adult                | 56     | 0.2%  | 0.857 | 0.001 |
| 2 |        |                                                       | 1,000  | 0.2%  |       |       |
| 1 | Z68.26 | Body mass index [BMI] 26.0-26.9, adult                | 50     | 0.2%  | 0.747 | 0.002 |
| 2 |        |                                                       | 959    | 0.2%  |       |       |
| 1 | Z68.27 | Body mass index [BMI] 27.0-27.9, adult                | 87     | 0.3%  | 0.003 | 0.018 |
| 2 |        |                                                       | 1,140  | 0.2%  |       |       |
| 1 | Z68.28 | Body mass index [BMI] 28.0-28.9, adult                | 107    | 0.4%  | <0.00 | 0.025 |
| 2 |        |                                                       | 1,266  | 0.3%  | 1     |       |
| 1 | Z68.29 | Body mass index [BMI] 29.0-29.9, adult                | 119    | 0.5%  | <0.00 | 0.028 |
| 2 |        |                                                       | 1,376  | 0.3%  | 1     |       |
| 1 | F10    | Alcohol related disorders                             | 197    | 0.8%  | <0.00 | 0.058 |
| 2 |        |                                                       | 6,405  | 1.3%  | 1     |       |
| 1 | Z80    | Family history of primary malignant neoplasm          | 1,430  | 5.5%  | <0.00 | 0.160 |
| 2 |        |                                                       | 11,367 | 2.4%  | 1     |       |
| 1 | Z15.0  | Genetic susceptibility to malignant neoplasm          | 18     | 0.1%  | <0.00 | 0.023 |
| 2 |        |                                                       | 100    | 0.0%  | 1     |       |
| 1 | Z12    | Encounter for screening for malignant neoplasms       | 7,877  | 30.3% | <0.00 | 0.410 |
| 2 |        |                                                       | 65,044 | 13.7% | 1     |       |
| 1 | Z85    | Personal history of malignant neoplasm                | 593    | 2.3%  | <0.00 | 0.052 |
| 2 |        |                                                       | 14,844 | 3.1%  | 1     |       |
| 1 | Z98.84 | Bariatric surgery status                              | 474    | 1.8%  | <0.00 | 0.099 |
| 2 |        |                                                       | 3,408  | 0.7%  | 1     |       |
| 1 | F17    | Nicotine dependence                                   | 1,905  | 7.3%  | <0.00 | 0.035 |
| 2 |        |                                                       | 39,400 | 8.3%  | 1     |       |
| 1 | E66.0  | Obesity due to excess calories                        | 5,392  | 20.7% | <0.00 | 0.356 |
| 2 |        |                                                       | 39,813 | 8.4%  | 1     |       |
| 1 | E66.2  | Morbid (severe) obesity with alveolar hypoventilation | 82     | 0.3%  | 0.029 | 0.015 |
| 2 |        |                                                       | 1,919  | 0.4%  |       |       |

|   |        |                      |        |       |       |       |
|---|--------|----------------------|--------|-------|-------|-------|
| 1 | E66.3  | Overweight           | 535    | 2.1%  | <0.00 | 0.120 |
| 2 |        |                      | 3,181  | 0.7%  | 1     |       |
| 1 | E66.8  | Other obesity        | 134    | 0.5%  | <0.00 | 0.064 |
| 2 |        |                      | 702    | 0.1%  | 1     |       |
| 1 | E66.9  | Obesity, unspecified | 7,879  | 30.3% | <0.00 | 0.431 |
| 2 |        |                      | 61,596 | 12.9% | 1     |       |
| 1 | Z72.0  | Tobacco use          | 572    | 2.2%  | <0.00 | 0.075 |
| 2 |        |                      | 5,857  | 1.2%  | 1     |       |
| 1 | Z79.89 | Hormone              | 137    | 0.5%  | <0.00 | 0.037 |
| 2 | 0      | replacement therapy  | 1,374  | 0.3%  | 1     |       |
| 1 | Z92.23 | Personal history of  | 10     | 0.0%  | 0.233 | 0.007 |
| 2 |        | estrogen therapy     | 124    | 0.0%  |       |       |
| 1 | Z80.3  | Family history of    | 736    | 2.8%  | <0.00 | 0.127 |
| 2 |        | malignant neoplasm   | 5,122  | 1.1%  | 1     |       |
|   |        | of breast            |        |       |       |       |
| 1 | E28.2  | Polycystic ovarian   | 979    | 3.8%  | <0.00 | 0.219 |
| 2 |        | syndrome             | 2,780  | 0.6%  | 1     |       |
| 1 | Z80.41 | Family history of    | 104    | 0.4%  | <0.00 | 0.056 |
| 2 |        | malignant neoplasm   | 554    | 0.1%  | 1     |       |
|   |        | of ovary             |        |       |       |       |
| 1 | D27    | Benign neoplasm of   | 95     | 0.4%  | <0.00 | 0.033 |
| 2 |        | ovary                | 902    | 0.2%  | 1     |       |

### Medication

| Group  | Mean ± SD | Patients | % of Group | P-Value | SMD   |
|--------|-----------|----------|------------|---------|-------|
| 1 A10B |           | 14,271   | 54.9%      | <0.00   | 0.780 |
| 2 A    |           | 93,949   | 19.7%      | 1       |       |
|        |           |          |            |         |       |
| 1 A10B |           | 6,822    | 26.2%      | <0.00   | 0.373 |
| 2 B    |           | 56,352   | 11.8%      | 1       |       |
|        |           |          |            |         |       |
| 1 A10B |           | 112      | 0.4%       | <0.00   | 0.049 |
| 2 F    |           | 784      | 0.2%       | 1       |       |
|        |           |          |            |         |       |
| 1 A10B |           | 1,834    | 7.1%       | <0.00   | 0.170 |
| 2 G    |           | 15,689   | 3.3%       | 1       |       |
|        |           |          |            |         |       |
| 1 A10B |           | 4,637    | 17.8%      | <0.00   | 0.444 |
| 2 H    |           | 20,235   | 4.3%       | 1       |       |
|        |           |          |            |         |       |
| 1 A10B |           | 2,219    | 8.5%       | <0.00   | 0.391 |
| 2 K    |           | 2,614    | 0.5%       | 1       |       |
|        |           |          |            |         |       |
| 1 A10B |           | 297      | 1.1%       | <0.00   | 0.047 |
| 2 X    |           | 3,287    | 0.7%       | 1       |       |
|        |           |          |            |         |       |

|   |       |               |  |       |      |       |       |
|---|-------|---------------|--|-------|------|-------|-------|
| 1 | HS200 | CONTRACEPTIVE |  | 1,345 | 5.2% | <0.00 | 0.237 |
| 2 |       | S,SYSTEMIC    |  | 5,117 | 1.1% | 1     |       |

**Group 1 (N = 25,739) and group 2 (N = 25,739) characteristics after propensity score matching**

**Demographics**

| Group |        | Mean ± SD                                 | Patients | % of Group | P-Value | SMD   |
|-------|--------|-------------------------------------------|----------|------------|---------|-------|
| 1     | AI     | Age at Index                              | 25,739   | 100%       | 0.081   | 0.015 |
| 2     |        |                                           | 25,739   | 100%       |         |       |
| 1     | 2106-3 | White                                     | 16,960   | 65.9%      | <0.00   | 0.039 |
| 2     |        |                                           | 17,436   | 67.7%      |         |       |
| 1     | 1002-5 | American Indian or Alaska Native          | 123      | 0.5%       | 0.323   | 0.009 |
| 2     |        |                                           | 108      | 0.4%       |         |       |
| 1     | UNK    | Unknown Race                              | 2,754    | 10.7%      | 0.052   | 0.017 |
| 2     |        |                                           | 2,619    | 10.2%      |         |       |
| 1     | 2076-8 | Native Hawaiian or Other Pacific Islander | 105      | 0.4%       | 0.092   | 0.015 |
| 2     |        |                                           | 82       | 0.3%       |         |       |
| 1     | UN     | Unknown Ethnicity                         | 5,052    | 19.6%      | 0.103   | 0.014 |
| 2     |        |                                           | 4,906    | 19.1%      |         |       |
| 1     | 2186-5 | Not Hispanic or Latino                    | 18,163   | 70.6%      | 0.074   | 0.016 |
| 2     |        |                                           | 18,347   | 71.3%      |         |       |
| 1     | 2135-2 | Hispanic or Latino                        | 2,524    | 9.8%       | 0.572   | 0.005 |
| 2     |        |                                           | 2,486    | 9.7%       |         |       |
| 1     | 2054-5 | Black or African American                 | 4,396    | 17.1%      | 0.104   | 0.014 |
| 2     |        |                                           | 4,258    | 16.5%      |         |       |
| 1     | 2028-9 | Asian                                     | 615      | 2.4%       | 0.024   | 0.020 |
| 2     |        |                                           | 539      | 2.1%       |         |       |

**Diagnosis**

| Group |             | Mean ± SD                                                                                     | Patients | % of Group | P-Value | SMD   |
|-------|-------------|-----------------------------------------------------------------------------------------------|----------|------------|---------|-------|
| 1     | Z55-<br>Z65 | Persons with potential health hazards related to socioeconomic and psychosocial circumstances | 461      | 1.8%       | 0.143   | 0.013 |
| 2     |             |                                                                                               | 418      | 1.6%       |         |       |
| 1     | E66         | Overweight and obesity                                                                        | 10,260   | 39.9%      | 0.517   | 0.006 |
| 2     |             |                                                                                               | 10,332   | 40.1%      |         |       |
| 1     | Z68.3       | Body mass index [BMI] 30-39, adult                                                            | 1,779    | 6.9%       | <0.00   | 0.035 |
| 2     |             |                                                                                               | 1,559    | 6.1%       |         |       |



|        |        |                                                       |                |                |            |       |
|--------|--------|-------------------------------------------------------|----------------|----------------|------------|-------|
| 1<br>2 | Z68.4  | Body mass index [BMI] 40 or greater, adult            | 2,100<br>1,922 | 8.2%<br>7.5%   | 0.003      | 0.026 |
| 1<br>2 | Z68.25 | Body mass index [BMI] 25.0-25.9, adult                | 56<br>50       | 0.2%<br>0.2%   | 0.560      | 0.005 |
| 1<br>2 | Z68.26 | Body mass index [BMI] 26.0-26.9, adult                | 50<br>58       | 0.2%<br>0.2%   | 0.441      | 0.007 |
| 1<br>2 | Z68.27 | Body mass index [BMI] 27.0-27.9, adult                | 87<br>69       | 0.3%<br>0.3%   | 0.149      | 0.013 |
| 1<br>2 | Z68.28 | Body mass index [BMI] 28.0-28.9, adult                | 106<br>85      | 0.4%<br>0.3%   | 0.128      | 0.013 |
| 1<br>2 | Z68.29 | Body mass index [BMI] 29.0-29.9, adult                | 118<br>91      | 0.5%<br>0.4%   | 0.061      | 0.016 |
| 1<br>2 | F10    | Alcohol related disorders                             | 197<br>155     | 0.8%<br>0.6%   | 0.025      | 0.020 |
| 1<br>2 | Z80    | Family history of primary malignant neoplasm          | 1,396<br>1,245 | 5.4%<br>4.8%   | 0.003      | 0.027 |
| 1<br>2 | Z15.0  | Genetic susceptibility to malignant neoplasm          | 17<br>10       | 0.1%<br>0.0%   | 0.178      | 0.012 |
| 1<br>2 | Z12    | Encounter for screening for malignant neoplasms       | 7,694<br>7,284 | 29.9%<br>28.3% | <0.00<br>1 | 0.035 |
| 1<br>2 | Z85    | Personal history of malignant neoplasm                | 590<br>509     | 2.3%<br>2.0%   | 0.014      | 0.022 |
| 1<br>2 | Z98.84 | Bariatric surgery status                              | 459<br>456     | 1.8%<br>1.8%   | 0.920      | 0.001 |
| 1<br>2 | F17    | Nicotine dependence                                   | 1,889<br>1,719 | 7.3%<br>6.7%   | 0.003      | 0.026 |
| 1<br>2 | E66.0  | Obesity due to excess calories                        | 5,262<br>5,280 | 20.4%<br>20.5% | 0.844      | 0.002 |
| 1<br>2 | E66.2  | Morbid (severe) obesity with alveolar hypoventilation | 81<br>71       | 0.3%<br>0.3%   | 0.417      | 0.007 |
| 1<br>2 | E66.3  | Overweight                                            | 512<br>463     | 2.0%<br>1.8%   | 0.113      | 0.014 |

|   |        |                              |       |       |       |        |
|---|--------|------------------------------|-------|-------|-------|--------|
| 1 | E66.8  | Other obesity                | 127   | 0.5%  | 0.900 | 0.001  |
| 2 |        |                              | 129   | 0.5%  |       |        |
| 1 | E66.9  | Obesity, unspecified         | 7,706 | 29.9% | 0.265 | 0.010  |
| 2 |        |                              | 7,822 | 30.4% |       |        |
| 1 | Z72.0  | Tobacco use                  | 562   | 2.2%  | 0.359 | 0.008  |
| 2 |        |                              | 532   | 2.1%  |       |        |
| 1 | Z79.89 | Hormone                      | 134   | 0.5%  | 0.094 | 0.015  |
| 2 | 0      | replacement therapy          | 108   | 0.4%  |       |        |
| 1 | Z92.23 | Personal history of          | 10    | 0.0%  | 1     | <0.001 |
| 2 |        | estrogen therapy             | 10    | 0.0%  |       |        |
| 1 | Z80.3  | Family history of            | 720   | 2.8%  | 0.021 | 0.020  |
| 2 |        | malignant neoplasm of breast | 636   | 2.5%  |       |        |
| 1 | E28.2  | Polycystic ovarian           | 938   | 3.6%  | 0.380 | 0.008  |
| 2 |        | syndrome                     | 901   | 3.5%  |       |        |
| 1 | Z80.41 | Family history of            | 99    | 0.4%  | 0.338 | 0.008  |
| 2 |        | malignant neoplasm of ovary  | 86    | 0.3%  |       |        |
| 1 | D27    | Benign neoplasm of           | 94    | 0.4%  | 0.104 | 0.014  |
| 2 |        | ovary                        | 73    | 0.3%  |       |        |

### Medication

| Group   | Mean ± SD | Patients | % of Group | P-Value | SMD   |
|---------|-----------|----------|------------|---------|-------|
| 1 A10B  |           | 14,003   | 54.4%      | 0.062   | 0.016 |
| 2 A     |           | 14,214   | 55.2%      |         |       |
| 1 A10B  |           | 6,697    | 26.0%      | 0.489   | 0.006 |
| 2 B     |           | 6,766    | 26.3%      |         |       |
| 1 A10B  |           | 109      | 0.4%       | 0.363   | 0.008 |
| 2 F     |           | 96       | 0.4%       |         |       |
| 1 A10B  |           | 1,797    | 7.0%       | 0.639   | 0.004 |
| 2 G     |           | 1,770    | 6.9%       |         |       |
| 1 A10B  |           | 4,445    | 17.3%      | 0.709   | 0.003 |
| 2 H     |           | 4,477    | 17.4%      |         |       |
| 1 A10B  |           | 1,970    | 7.7%       | <0.001  | 0.042 |
| 2 K     |           | 1,690    | 6.6%       |         |       |
| 1 A10B  |           | 292      | 1.1%       | 0.706   | 0.003 |
| 2 X     |           | 283      | 1.1%       |         |       |
| 1 HS200 |           | 1,292    | 5.0%       | 0.135   | 0.013 |
| 2       |           | 1,219    | 4.7%       |         |       |

**eTable 10.** Characteristics of the GLP-1RA/no insulin group and insulin/no GLP-1RA group before and after matched for covariates related to pancreatic cancer for the study populations of patients with T2D and no history of any OAC

| <b>Group 1 (N = 48,983) and group 2 (N = 1,044,745) characteristics before propensity score matching</b> |        |                                           |           |            |         |       |
|----------------------------------------------------------------------------------------------------------|--------|-------------------------------------------|-----------|------------|---------|-------|
| <b>Demographics</b>                                                                                      |        |                                           |           |            |         |       |
| Group                                                                                                    |        | Mean ± SD                                 | Patients  | % of Group | P-Value | SMD   |
| 1                                                                                                        | AI     | Age at Index                              | 48,983    | 100%       | <0.00   | 0.420 |
| 2                                                                                                        |        |                                           | 1,044,745 | 100%       | 1       |       |
| 1                                                                                                        | 2106-3 | White                                     | 32,592    | 66.5%      | <0.00   | 0.122 |
| 2                                                                                                        |        |                                           | 633,989   | 60.7%      | 1       |       |
| 1                                                                                                        | 1002-5 | American Indian or Alaska Native          | 199       | 0.4%       | 0.004   | 0.013 |
| 2                                                                                                        |        |                                           | 3,443     | 0.3%       |         |       |
| 1                                                                                                        | UNK    | Unknown Race                              | 7,099     | 14.5%      | <0.00   | 0.025 |
| 2                                                                                                        |        |                                           | 142,470   | 13.6%      | 1       |       |
| 1                                                                                                        | F      | Female                                    | 26,011    | 53.1%      | <0.00   | 0.151 |
| 2                                                                                                        |        |                                           | 476,110   | 45.6%      | 1       |       |
| 1                                                                                                        | 2076-8 | Native Hawaiian or Other Pacific Islander | 205       | 0.4%       | <0.00   | 0.071 |
| 2                                                                                                        |        |                                           | 10,677    | 1.0%       | 1       |       |
| 1                                                                                                        | UN     | Unknown Gender                            | 2,252     | 4.6%       | <0.00   | 0.106 |
| 2                                                                                                        |        |                                           | 27,321    | 2.6%       | 1       |       |
| 1                                                                                                        | 2186-5 | Not Hispanic or Latino                    | 33,188    | 67.8%      | <0.00   | 0.098 |
| 2                                                                                                        |        |                                           | 659,375   | 63.1%      | 1       |       |
| 1                                                                                                        | 2135-2 | Hispanic or Latino                        | 4,151     | 8.5%       | <0.00   | 0.019 |
| 2                                                                                                        |        |                                           | 94,136    | 9.0%       | 1       |       |
| 1                                                                                                        | 2054-5 | Black or African American                 | 6,265     | 12.8%      | <0.00   | 0.120 |
| 2                                                                                                        |        |                                           | 178,267   | 17.1%      | 1       |       |
| 1                                                                                                        | M      | Male                                      | 20,720    | 42.3%      | <0.00   | 0.191 |
| 2                                                                                                        |        |                                           | 541,314   | 51.8%      | 1       |       |
| 1                                                                                                        | 2028-9 | Asian                                     | 1,204     | 2.5%       | <0.00   | 0.087 |
| 2                                                                                                        |        |                                           | 41,822    | 4.0%       | 1       |       |
| <b>Diagnosis</b>                                                                                         |        |                                           |           |            |         |       |
| Group                                                                                                    |        | Mean ± SD                                 | Patients  | % of Group | P-Value | SMD   |
| 1                                                                                                        | Z55-   | Persons with potential health             | 686       | 1.4%       | <0.00   | 0.022 |
| 2                                                                                                        | Z65    | hazards related to socioeconomic and      | 12,021    | 1.2%       | 1       |       |

|   |        | psychosocial<br>circumstances                         |         |       |       |        |
|---|--------|-------------------------------------------------------|---------|-------|-------|--------|
| 1 | E66    | Overweight and<br>obesity                             | 18,401  | 37.6% | <0.00 | 0.504  |
| 2 |        |                                                       | 166,445 | 15.9% | 1     |        |
| 1 | Z68.3  | Body mass index<br>[BMI] 30-39, adult                 | 4,204   | 8.6%  | <0.00 | 0.183  |
| 2 |        |                                                       | 43,128  | 4.1%  | 1     |        |
| 1 | Z68.4  | Body mass index<br>[BMI] 40 or greater,<br>adult      | 3,886   | 7.9%  | <0.00 | 0.208  |
| 2 |        |                                                       | 33,396  | 3.2%  | 1     |        |
| 1 | Z68.25 | Body mass index<br>[BMI] 25.0-25.9,<br>adult          | 157     | 0.3%  | 0.563 | 0.003  |
| 2 |        |                                                       | 3,510   | 0.3%  |       |        |
| 1 | Z68.26 | Body mass index<br>[BMI] 26.0-26.9,<br>adult          | 171     | 0.3%  | 0.957 | <0.001 |
| 2 |        |                                                       | 3,632   | 0.3%  |       |        |
| 1 | Z68.27 | Body mass index<br>[BMI] 27.0-27.9,<br>adult          | 288     | 0.6%  | <0.00 | 0.026  |
| 2 |        |                                                       | 4,209   | 0.4%  | 1     |        |
| 1 | Z68.28 | Body mass index<br>[BMI] 28.0-28.9,<br>adult          | 344     | 0.7%  | <0.00 | 0.036  |
| 2 |        |                                                       | 4,508   | 0.4%  | 1     |        |
| 1 | Z68.29 | Body mass index<br>[BMI] 29.0-29.9,<br>adult          | 398     | 0.8%  | <0.00 | 0.044  |
| 2 |        |                                                       | 4,843   | 0.5%  | 1     |        |
| 1 | F10    | Alcohol related<br>disorders                          | 563     | 1.1%  | <0.00 | 0.115  |
| 2 |        |                                                       | 28,538  | 2.7%  | 1     |        |
| 1 | Z80    | Family history of<br>primary malignant<br>neoplasm    | 2,042   | 4.2%  | <0.00 | 0.136  |
| 2 |        |                                                       | 19,398  | 1.9%  | 1     |        |
| 1 | Z15.0  | Genetic<br>susceptibility to<br>malignant neoplasm    | 24      | 0.0%  | <0.00 | 0.019  |
| 2 |        |                                                       | 156     | 0.0%  | 1     |        |
| 1 | Z12    | Encounter for<br>screening for<br>malignant neoplasms | 12,272  | 25.1% | <0.00 | 0.402  |
| 2 |        |                                                       | 105,217 | 10.1% | 1     |        |
| 1 | Z85    | Personal history of<br>malignant neoplasm             | 1,239   | 2.5%  | <0.00 | 0.066  |
| 2 |        |                                                       | 38,294  | 3.7%  | 1     |        |
| 1 | Z98.84 | Bariatric surgery<br>status                           | 632     | 1.3%  | <0.00 | 0.085  |
| 2 |        |                                                       | 5,136   | 0.5%  | 1     |        |
| 1 | E66.0  | Obesity due to<br>excess calories                     | 9,157   | 18.7% | <0.00 | 0.366  |
| 2 |        |                                                       | 69,998  | 6.7%  | 1     |        |

|   |            |                                                                               |         |       |        |       |
|---|------------|-------------------------------------------------------------------------------|---------|-------|--------|-------|
| 1 | E66.2      | Morbid (severe) obesity with alveolar hypoventilation                         | 150     | 0.3%  | 0.118  | 0.007 |
| 2 |            |                                                                               | 3,643   | 0.3%  |        |       |
| 1 | E66.3      | Overweight                                                                    | 1,010   | 2.1%  | <0.001 | 0.122 |
| 2 |            |                                                                               | 6,796   | 0.7%  |        |       |
| 1 | E66.8      | Other obesity                                                                 | 235     | 0.5%  | <0.001 | 0.065 |
| 2 |            |                                                                               | 1,298   | 0.1%  |        |       |
| 1 | E66.9      | Obesity, unspecified                                                          | 13,805  | 28.2% | <0.001 | 0.433 |
| 2 |            |                                                                               | 118,555 | 11.3% |        |       |
| 1 | Z85.09     | Personal history of malignant neoplasm of other digestive organs              | 10      | 0.0%  | 0.571  | 0.003 |
| 2 |            |                                                                               | 256     | 0.0%  |        |       |
| 1 | B96.8<br>1 | Helicobacter pylori [H. pylori] as the cause of diseases classified elsewhere | 254     | 0.5%  | <0.001 | 0.021 |
| 2 |            |                                                                               | 3,973   | 0.4%  |        |       |
| 1 | Z80.0      | Family history of malignant neoplasm of digestive organs                      | 784     | 1.6%  | <0.001 | 0.089 |
| 2 |            |                                                                               | 6,889   | 0.7%  |        |       |
| 1 | B18        | Chronic viral hepatitis                                                       | 260     | 0.5%  | <0.001 | 0.075 |
| 2 |            |                                                                               | 12,879  | 1.2%  |        |       |
| 1 | K86.1      | Other chronic pancreatitis                                                    | 75      | 0.2%  | <0.001 | 0.093 |
| 2 |            |                                                                               | 8,232   | 0.8%  |        |       |
| 1 | B16        | Acute hepatitis B                                                             | 55      | 0.1%  | 0.048  | 0.010 |
| 2 |            |                                                                               | 1,537   | 0.1%  |        |       |
| 1 | B18.1      | Chronic viral hepatitis B without delta-agent                                 | 48      | 0.1%  | 0.002  | 0.016 |
| 2 |            |                                                                               | 1,611   | 0.2%  |        |       |
| 1 | Z72.0      | Tobacco use                                                                   | 1,064   | 2.2%  | <0.001 | 0.064 |
| 2 |            |                                                                               | 13,876  | 1.3%  |        |       |
| 1 | D13.6      | Benign neoplasm of pancreas                                                   | 10      | 0.0%  | 0.099  | 0.008 |
| 2 |            |                                                                               | 360     | 0.0%  |        |       |

### Medication

| Group         | Mean ± SD | Patients | % of Group | P-Value | SMD   |
|---------------|-----------|----------|------------|---------|-------|
| 1 A10B<br>2 A |           | 27,075   | 55.3%      | <0.001  | 0.806 |
|               |           | 199,802  | 19.1%      |         |       |
| 1 A10B<br>2 B |           | 14,077   | 28.7%      | <0.001  | 0.424 |
|               |           | 125,703  | 12.0%      |         |       |
| 1 A10B<br>2 F |           | 229      | 0.5%       | <0.001  | 0.054 |
|               |           | 1,718    | 0.2%       |         |       |

|   |      |                                                           |        |       |       |       |
|---|------|-----------------------------------------------------------|--------|-------|-------|-------|
| 1 | A10B | Thiazolidinediones                                        | 4,107  | 8.4%  | <0.00 | 0.213 |
| 2 | G    |                                                           | 35,435 | 3.4%  | 1     |       |
| 1 | A10B | Dipeptidyl peptidase<br>4 (DPP-4) inhibitors              | 9,485  | 19.4% | <0.00 | 0.481 |
| 2 | H    |                                                           | 44,595 | 4.3%  | 1     |       |
| 1 | A10B | Sodium-glucose co-<br>transporter 2<br>(SGLT2) inhibitors | 4,808  | 9.8%  | <0.00 | 0.423 |
| 2 | K    |                                                           | 6,447  | 0.6%  | 1     |       |
| 1 | A10B | Other blood glucose<br>lowering drugs, excl.<br>insulins  | 614    | 1.3%  | <0.00 | 0.059 |
| 2 | X    |                                                           | 7,048  | 0.7%  | 1     |       |

**Group 1 (N = 48,490) and group 2 (N = 48,490) characteristics after propensity score matching**

**Demographics**

| Group |        |                                                 | Mean ± SD     | Patients | % of Group | P-Value | SMD   |
|-------|--------|-------------------------------------------------|---------------|----------|------------|---------|-------|
| 1     | AI     | Age at Index                                    | 55.9 +/- 11.7 | 48,490   | 100%       | 0.154   | 0.009 |
| 2     |        |                                                 | 56.0 +/- 13.1 | 48,490   | 100%       |         |       |
| 1     | 2106-3 | White                                           |               | 32,268   | 66.5%      | <0.00   | 0.043 |
| 2     |        |                                                 | 33,234        | 68.5%    |            |         |       |
| 1     | 1002-5 | American Indian or<br>Alaska Native             |               | 197      | 0.4%       | 0.352   | 0.006 |
| 2     |        |                                                 | 179           | 0.4%     |            |         |       |
| 1     | UNK    | Unknown Race                                    |               | 6,991    | 14.4%      | 0.002   | 0.020 |
| 2     |        |                                                 | 6,652         | 13.7%    |            |         |       |
| 1     | F      | Female                                          |               | 25,736   | 53.1%      | <0.00   | 0.022 |
| 2     |        |                                                 | 26,279        | 54.2%    |            |         |       |
| 1     | 2076-8 | Native Hawaiian or<br>Other Pacific<br>Islander |               | 205      | 0.4%       | 0.001   | 0.021 |
| 2     |        |                                                 | 145           | 0.3%     |            |         |       |
| 1     | UN     | Unknown Gender                                  |               | 2,179    | 4.5%       | 0.026   | 0.014 |
| 2     |        |                                                 | 2,038         | 4.2%     |            |         |       |
| 1     | 2186-5 | Not Hispanic or<br>Latino                       |               | 32,860   | 67.8%      | 0.001   | 0.022 |
| 2     |        |                                                 | 33,363        | 68.8%    |            |         |       |
| 1     | 2135-2 | Hispanic or Latino                              |               | 4,119    | 8.5%       | 0.034   | 0.014 |
| 2     |        |                                                 | 3,937         | 8.1%     |            |         |       |
| 1     | 2054-5 | Black or African<br>American                    |               | 6,223    | 12.8%      | 0.003   | 0.019 |
| 2     |        |                                                 | 5,922         | 12.2%    |            |         |       |
| 1     | M      | Male                                            |               | 20,575   | 42.4%      | 0.009   | 0.017 |
| 2     |        |                                                 | 20,173        | 41.6%    |            |         |       |
| 1     | 2028-9 | Asian                                           |               | 1,199    | 2.5%       | <0.00   | 0.022 |
| 2     |        |                                                 | 1,036         | 2.1%     |            |         |       |

**Diagnosis**

| Group           | Mean ± SD                                                                                     | Patients         | % of Group     | P-Value | SMD   |
|-----------------|-----------------------------------------------------------------------------------------------|------------------|----------------|---------|-------|
| 1 Z55-<br>2 Z65 | Persons with potential health hazards related to socioeconomic and psychosocial circumstances | 679<br>566       | 1.4%<br>1.2%   | 0.001   | 0.021 |
| 1 E66<br>2      | Overweight and obesity                                                                        | 18,013<br>17,981 | 37.1%<br>37.1% | 0.832   | 0.001 |
| 1 Z68.3<br>2    | Body mass index [BMI] 30-39, adult                                                            | 4,063<br>3,633   | 8.4%<br>7.5%   | <0.001  | 0.033 |
| 1 Z68.4<br>2    | Body mass index [BMI] 40 or greater, adult                                                    | 3,789<br>3,390   | 7.8%<br>7.0%   | <0.001  | 0.031 |
| 1 Z68.25<br>2   | Body mass index [BMI] 25.0-25.9, adult                                                        | 156<br>150       | 0.3%<br>0.3%   | 0.731   | 0.002 |
| 1 Z68.26<br>2   | Body mass index [BMI] 26.0-26.9, adult                                                        | 171<br>149       | 0.4%<br>0.3%   | 0.218   | 0.008 |
| 1 Z68.27<br>2   | Body mass index [BMI] 27.0-27.9, adult                                                        | 284<br>233       | 0.6%<br>0.5%   | 0.025   | 0.014 |
| 1 Z68.28<br>2   | Body mass index [BMI] 28.0-28.9, adult                                                        | 334<br>283       | 0.7%<br>0.6%   | 0.039   | 0.013 |
| 1 Z68.29<br>2   | Body mass index [BMI] 29.0-29.9, adult                                                        | 386<br>351       | 0.8%<br>0.7%   | 0.196   | 0.008 |
| 1 F10<br>2      | Alcohol related disorders                                                                     | 562<br>460       | 1.2%<br>0.9%   | 0.001   | 0.021 |
| 1 Z80<br>2      | Family history of primary malignant neoplasm                                                  | 1,995<br>1,859   | 4.1%<br>3.8%   | 0.025   | 0.014 |
| 1 Z15.0<br>2    | Genetic susceptibility to malignant neoplasm                                                  | 22<br>17         | 0.0%<br>0.0%   | 0.423   | 0.005 |
| 1 Z12<br>2      | Encounter for screening for malignant neoplasms                                               | 11,955<br>11,588 | 24.7%<br>23.9% | 0.006   | 0.018 |
| 1 Z85<br>2      | Personal history of malignant neoplasm                                                        | 1,230<br>1,109   | 2.5%<br>2.3%   | 0.011   | 0.016 |

|                   |        |                                                                               |          |            |         |        |
|-------------------|--------|-------------------------------------------------------------------------------|----------|------------|---------|--------|
| 1                 | Z98.84 | Bariatric surgery status                                                      | 613      | 1.3%       | 0.068   | 0.012  |
| 2                 |        |                                                                               | 551      | 1.1%       |         |        |
| 1                 | E66.0  | Obesity due to excess calories                                                | 8,924    | 18.4%      | 0.315   | 0.006  |
| 2                 |        |                                                                               | 8,803    | 18.2%      |         |        |
| 1                 | E66.2  | Morbid (severe) obesity with alveolar hypoventilation                         | 149      | 0.3%       | 0.477   | 0.005  |
| 2                 |        |                                                                               | 137      | 0.3%       |         |        |
| 1                 | E66.3  | Overweight                                                                    | 980      | 2.0%       | 0.090   | 0.011  |
| 2                 |        |                                                                               | 907      | 1.9%       |         |        |
| 1                 | E66.8  | Other obesity                                                                 | 223      | 0.5%       | 0.186   | 0.008  |
| 2                 |        |                                                                               | 196      | 0.4%       |         |        |
| 1                 | E66.9  | Obesity, unspecified                                                          | 13,488   | 27.8%      | 0.331   | 0.006  |
| 2                 |        |                                                                               | 13,624   | 28.1%      |         |        |
| 1                 | Z85.09 | Personal history of malignant neoplasm of other digestive organs              | 10       | 0.0%       | 1       | <0.001 |
| 2                 |        |                                                                               | 10       | 0.0%       |         |        |
| 1                 | B96.8  | Helicobacter pylori [H. pylori] as the cause of diseases classified elsewhere | 252      | 0.5%       | 0.140   | 0.009  |
| 2                 |        |                                                                               | 1        | 220        |         |        |
| 1                 | Z80.0  | Family history of malignant neoplasm of digestive organs                      | 763      | 1.6%       | 0.005   | 0.018  |
| 2                 |        |                                                                               | 659      | 1.4%       |         |        |
| 1                 | B18    | Chronic viral hepatitis                                                       | 260      | 0.5%       | 0.048   | 0.013  |
| 2                 |        |                                                                               | 217      | 0.4%       |         |        |
| 1                 | K86.1  | Other chronic pancreatitis                                                    | 75       | 0.2%       | 0.025   | 0.014  |
| 2                 |        |                                                                               | 105      | 0.2%       |         |        |
| 1                 | B16    | Acute hepatitis B                                                             | 54       | 0.1%       | 0.033   | 0.014  |
| 2                 |        |                                                                               | 34       | 0.1%       |         |        |
| 1                 | B18.1  | Chronic viral hepatitis B without delta-agent                                 | 48       | 0.1%       | 0.003   | 0.019  |
| 2                 |        |                                                                               | 23       | 0.0%       |         |        |
| 1                 | Z72.0  | Tobacco use                                                                   | 1,047    | 2.2%       | 0.047   | 0.013  |
| 2                 |        |                                                                               | 959      | 2.0%       |         |        |
| 1                 | D13.6  | Benign neoplasm of pancreas                                                   | 10       | 0.0%       | 0.827   | 0.001  |
| 2                 |        |                                                                               | 11       | 0.0%       |         |        |
| <b>Medication</b> |        |                                                                               |          |            |         |        |
| Group             |        | Mean ± SD                                                                     | Patients | % of Group | P-Value | SMD    |
| 1                 | A10B   | Biguanides                                                                    | 26,585   | 54.8%      | 0.005   | 0.018  |
| 2                 | A      |                                                                               | 27,020   | 55.7%      |         |        |



|   |      |                                                    |        |       |        |       |
|---|------|----------------------------------------------------|--------|-------|--------|-------|
| 1 | A10B | Sulfonylureas                                      | 13,771 | 28.4% | 0.143  | 0.009 |
| 2 | B    |                                                    | 13,977 | 28.8% |        |       |
| 1 | A10B | Alpha glucosidase inhibitors                       | 221    | 0.5%  | 0.153  | 0.009 |
| 2 | F    |                                                    | 192    | 0.4%  |        |       |
| 1 | A10B | Thiazolidinediones                                 | 4,030  | 8.3%  | 0.262  | 0.007 |
| 2 | G    |                                                    | 4,127  | 8.5%  |        |       |
| 1 | A10B | Dipeptidyl peptidase 4 (DPP-4) inhibitors          | 9,110  | 18.8% | 0.283  | 0.007 |
| 2 | H    |                                                    | 9,241  | 19.1% |        |       |
| 1 | A10B | Sodium-glucose co-transporter 2 (SGLT2) inhibitors | 4,335  | 8.9%  | <0.001 | 0.035 |
| 2 | K    |                                                    | 3,863  | 8.0%  |        |       |
| 1 | A10B | Other blood glucose lowering drugs, excl. insulins | 607    | 1.3%  | 0.066  | 0.012 |
| 2 | X    |                                                    | 545    | 1.1%  |        |       |

eTable 11. Characteristics of the GLP-1RA/no insulin group and insulin/no GLP-1RA group before and after matched for covariates related to thyroid cancer for the study populations of patients with T2D and no history of any OAC

**Group 1 (N = 48,983) and group 2 (N = 1,044,745) characteristics before propensity score matching**

**Demographics**

| Group  |                                                  | Mean ± SD                      | Patients            | % of Group     | P-Value    | SMD   |
|--------|--------------------------------------------------|--------------------------------|---------------------|----------------|------------|-------|
| 1<br>2 | AI Age at Index                                  | 55.9 +/- 11.7<br>61.8 +/- 15.9 | 48,983<br>1,044,745 | 100%<br>100%   | <0.00<br>1 | 0.420 |
| 1<br>2 | 2106-3 White                                     |                                | 32,592<br>633,989   | 66.5%<br>60.7% | <0.00<br>1 | 0.122 |
| 1<br>2 | 1002-5 American Indian or Alaska Native          |                                | 199<br>3,443        | 0.4%<br>0.3%   | 0.004      | 0.013 |
| 1<br>2 | UNK Unknown Race                                 |                                | 7,099<br>142,470    | 14.5%<br>13.6% | <0.00<br>1 | 0.025 |
| 1<br>2 | F Female                                         |                                | 26,011<br>476,110   | 53.1%<br>45.6% | <0.00<br>1 | 0.151 |
| 1<br>2 | 2076-8 Native Hawaiian or Other Pacific Islander |                                | 205<br>10,677       | 0.4%<br>1.0%   | <0.00<br>1 | 0.071 |
| 1<br>2 | UN Unknown Gender                                |                                | 2,252<br>27,321     | 4.6%<br>2.6%   | <0.00<br>1 | 0.106 |
| 1<br>2 | 2186-5 Not Hispanic or Latino                    |                                | 33,188<br>659,375   | 67.8%<br>63.1% | <0.00<br>1 | 0.098 |
| 1<br>2 | 2135-2 Hispanic or Latino                        |                                | 4,151<br>94,136     | 8.5%<br>9.0%   | <0.00<br>1 | 0.019 |
| 1<br>2 | 2054-5 Black or African American                 |                                | 6,265<br>178,267    | 12.8%<br>17.1% | <0.00<br>1 | 0.120 |
| 1<br>2 | M Male                                           |                                | 20,720<br>541,314   | 42.3%<br>51.8% | <0.00<br>1 | 0.191 |
| 1<br>2 | 2028-9 Asian                                     |                                | 1,204<br>41,822     | 2.5%<br>4.0%   | <0.00<br>1 | 0.087 |

**Diagnosis**

| Group  |                                                                             | Mean ± SD | Patients      | % of Group   | P-Value    | SMD   |
|--------|-----------------------------------------------------------------------------|-----------|---------------|--------------|------------|-------|
| 1<br>2 | Z55- Z65 Persons with potential health hazards related to socioeconomic and |           | 686<br>12,021 | 1.4%<br>1.2% | <0.00<br>1 | 0.022 |

|   |        | psychosocial<br>circumstances                         |         |       |       |        |
|---|--------|-------------------------------------------------------|---------|-------|-------|--------|
| 1 | E66    | Overweight and obesity                                | 18,401  | 37.6% | <0.00 | 0.504  |
| 2 |        |                                                       | 166,445 | 15.9% | 1     |        |
| 1 | Z68.3  | Body mass index [BMI] 30-39, adult                    | 4,204   | 8.6%  | <0.00 | 0.183  |
| 2 |        |                                                       | 43,128  | 4.1%  | 1     |        |
| 1 | Z68.4  | Body mass index [BMI] 40 or greater, adult            | 3,886   | 7.9%  | <0.00 | 0.208  |
| 2 |        |                                                       | 33,396  | 3.2%  | 1     |        |
| 1 | Z68.25 | Body mass index [BMI] 25.0-25.9, adult                | 157     | 0.3%  | 0.563 | 0.003  |
| 2 |        |                                                       | 3,510   | 0.3%  |       |        |
| 1 | Z68.26 | Body mass index [BMI] 26.0-26.9, adult                | 171     | 0.3%  | 0.957 | <0.001 |
| 2 |        |                                                       | 3,632   | 0.3%  |       |        |
| 1 | Z68.27 | Body mass index [BMI] 27.0-27.9, adult                | 288     | 0.6%  | <0.00 | 0.026  |
| 2 |        |                                                       | 4,209   | 0.4%  | 1     |        |
| 1 | Z68.28 | Body mass index [BMI] 28.0-28.9, adult                | 344     | 0.7%  | <0.00 | 0.036  |
| 2 |        |                                                       | 4,508   | 0.4%  | 1     |        |
| 1 | Z68.29 | Body mass index [BMI] 29.0-29.9, adult                | 398     | 0.8%  | <0.00 | 0.044  |
| 2 |        |                                                       | 4,843   | 0.5%  | 1     |        |
| 1 | Z80    | Family history of primary malignant neoplasm          | 2,042   | 4.2%  | <0.00 | 0.136  |
| 2 |        |                                                       | 19,398  | 1.9%  | 1     |        |
| 1 | Z15.0  | Genetic susceptibility to malignant neoplasm          | 24      | 0.0%  | <0.00 | 0.019  |
| 2 |        |                                                       | 156     | 0.0%  | 1     |        |
| 1 | Z12    | Encounter for screening for malignant neoplasms       | 12,272  | 25.1% | <0.00 | 0.402  |
| 2 |        |                                                       | 105,217 | 10.1% | 1     |        |
| 1 | Z85    | Personal history of malignant neoplasm                | 1,239   | 2.5%  | <0.00 | 0.066  |
| 2 |        |                                                       | 38,294  | 3.7%  | 1     |        |
| 1 | Z98.84 | Bariatric surgery status                              | 632     | 1.3%  | <0.00 | 0.085  |
| 2 |        |                                                       | 5,136   | 0.5%  | 1     |        |
| 1 | E66.0  | Obesity due to excess calories                        | 9,157   | 18.7% | <0.00 | 0.366  |
| 2 |        |                                                       | 69,998  | 6.7%  | 1     |        |
| 1 | E66.2  | Morbid (severe) obesity with alveolar hypoventilation | 150     | 0.3%  | 0.118 | 0.007  |
| 2 |        |                                                       | 3,643   | 0.3%  |       |        |

|                   |       |                                                                                                                                                 |           |          |            |         |       |
|-------------------|-------|-------------------------------------------------------------------------------------------------------------------------------------------------|-----------|----------|------------|---------|-------|
| 1                 | E66.3 | Overweight                                                                                                                                      |           | 1,010    | 2.1%       | <0.00   |       |
| 2                 |       |                                                                                                                                                 |           | 6,796    | 0.7%       | 1       | 0.122 |
| 1                 | E66.8 | Other obesity                                                                                                                                   |           | 235      | 0.5%       | <0.00   |       |
| 2                 |       |                                                                                                                                                 |           | 1,298    | 0.1%       | 1       | 0.065 |
| 1                 | E66.9 | Obesity, unspecified                                                                                                                            |           | 13,805   | 28.2%      | <0.00   |       |
| 2                 |       |                                                                                                                                                 |           | 118,555  | 11.3%      | 1       | 0.433 |
| 1                 | D34   | Benign neoplasm of thyroid gland                                                                                                                |           | 65       | 0.1%       | <0.00   |       |
| 2                 |       |                                                                                                                                                 |           | 765      | 0.1%       | 1       | 0.019 |
| <b>Procedure</b>  |       |                                                                                                                                                 |           |          |            |         |       |
| Group             |       |                                                                                                                                                 | Mean ± SD | Patients | % of Group | P-Value | SMD   |
| 1                 | 10278 | Hereditary neuroendocrine tumor disorders (eg, medullary thyroid carcinoma, parathyroid carcinoma, malignant pheochromocytoma or paraganglioma) |           | 0        | 0%         | --      | --    |
| 2                 | 53    |                                                                                                                                                 |           | 0        | 0%         |         |       |
| 1                 | 1001  | Radiation                                                                                                                                       |           | 138      | 0.3%       | <0.00   |       |
| 2                 |       |                                                                                                                                                 |           | 7,649    | 0.7%       | 1       | 0.063 |
| <b>Medication</b> |       |                                                                                                                                                 |           |          |            |         |       |
| Group             |       |                                                                                                                                                 | Mean ± SD | Patients | % of Group | P-Value | SMD   |
| 1                 | A10B  | Biguanides                                                                                                                                      |           | 27,075   | 55.3%      | <0.00   |       |
| 2                 | A     |                                                                                                                                                 |           | 199,802  | 19.1%      | 1       | 0.806 |
| 1                 | A10B  | Sulfonylureas                                                                                                                                   |           | 14,077   | 28.7%      | <0.00   |       |
| 2                 | B     |                                                                                                                                                 |           | 125,703  | 12.0%      | 1       | 0.424 |
| 1                 | A10B  | Alpha glucosidase inhibitors                                                                                                                    |           | 229      | 0.5%       | <0.00   |       |
| 2                 | F     |                                                                                                                                                 |           | 1,718    | 0.2%       | 1       | 0.054 |
| 1                 | A10B  | Thiazolidinediones                                                                                                                              |           | 4,107    | 8.4%       | <0.00   |       |
| 2                 | G     |                                                                                                                                                 |           | 35,435   | 3.4%       | 1       | 0.213 |
| 1                 | A10B  | Dipeptidyl peptidase 4 (DPP-4) inhibitors                                                                                                       |           | 9,485    | 19.4%      | <0.00   |       |
| 2                 | H     |                                                                                                                                                 |           | 44,595   | 4.3%       | 1       | 0.481 |
| 1                 | A10B  | Sodium-glucose co-transporter 2 (SGLT2) inhibitors                                                                                              |           | 4,808    | 9.8%       | <0.00   |       |
| 2                 | K     |                                                                                                                                                 |           | 6,447    | 0.6%       | 1       | 0.423 |
| 1                 | A10B  | Other blood glucose lowering drugs, excl. insulins                                                                                              |           | 614      | 1.3%       | <0.00   |       |
| 2                 | X     |                                                                                                                                                 |           | 7,048    | 0.7%       | 1       | 0.059 |

**Group 1 (N = 48,527) and group 2 (N = 48,527) characteristics after propensity score matching**

**Demographics**

| Group |        | Mean ± SD                                 | Patients      | % of Group | P-Value | SMD   |       |
|-------|--------|-------------------------------------------|---------------|------------|---------|-------|-------|
| 1     | AI     | Age at Index                              | 55.9 +/- 11.7 | 48,527     | 100%    | 0.154 | 0.009 |
| 2     |        |                                           | 56.0 +/- 13.0 | 48,527     | 100%    |       |       |
| 1     | 2106-3 | White                                     | 32,294        | 66.5%      | <0.001  | 0.044 |       |
| 2     |        |                                           | 33,289        | 68.6%      |         |       |       |
| 1     | 1002-5 | American Indian or Alaska Native          | 197           | 0.4%       | 0.092   | 0.011 |       |
| 2     |        |                                           | 165           | 0.3%       |         |       |       |
| 1     | UNK    | Unknown Race                              | 6,995         | 14.4%      | <0.001  | 0.023 |       |
| 2     |        |                                           | 6,615         | 13.6%      |         |       |       |
| 1     | F      | Female                                    | 25,749        | 53.1%      | 0.003   | 0.019 |       |
| 2     |        |                                           | 26,218        | 54.0%      |         |       |       |
| 1     | 2076-8 | Native Hawaiian or Other Pacific Islander | 205           | 0.4%       | 0.028   | 0.014 |       |
| 2     |        |                                           | 163           | 0.3%       |         |       |       |
| 1     | UN     | Unknown Gender                            | 2,183         | 4.5%       | 0.028   | 0.014 |       |
| 2     |        |                                           | 2,043         | 4.2%       |         |       |       |
| 1     | 2186-5 | Not Hispanic or Latino                    | 32,880        | 67.8%      | 0.002   | 0.020 |       |
| 2     |        |                                           | 33,324        | 68.7%      |         |       |       |
| 1     | 2135-2 | Hispanic or Latino                        | 4,125         | 8.5%       | 0.006   | 0.018 |       |
| 2     |        |                                           | 3,889         | 8.0%       |         |       |       |
| 1     | 2054-5 | Black or African American                 | 6,231         | 12.8%      | 0.077   | 0.011 |       |
| 2     |        |                                           | 6,048         | 12.5%      |         |       |       |
| 1     | M      | Male                                      | 20,595        | 42.4%      | 0.032   | 0.014 |       |
| 2     |        |                                           | 20,266        | 41.8%      |         |       |       |
| 1     | 2028-9 | Asian                                     | 1,196         | 2.5%       | <0.001  | 0.029 |       |
| 2     |        |                                           | 985           | 2.0%       |         |       |       |

**Diagnosis**

| Group |         | Mean ± SD                                                                                     | Patients | % of Group | P-Value | SMD   |
|-------|---------|-----------------------------------------------------------------------------------------------|----------|------------|---------|-------|
| 1     | Z55-Z65 | Persons with potential health hazards related to socioeconomic and psychosocial circumstances | 682      | 1.4%       | <0.001  | 0.022 |
| 2     |         |                                                                                               | 560      | 1.2%       |         |       |
| 1     | E66     | Overweight and obesity                                                                        | 18,048   | 37.2%      | 0.478   | 0.005 |
| 2     |         |                                                                                               | 18,155   | 37.4%      |         |       |

|   |        |                                                             |        |       |            |        |
|---|--------|-------------------------------------------------------------|--------|-------|------------|--------|
| 1 | Z68.3  | Body mass index<br>[BMI] 30-39, adult                       | 4,070  | 8.4%  | <0.00<br>1 | 0.023  |
| 2 |        |                                                             | 3,762  | 7.8%  |            |        |
| 1 | Z68.4  | Body mass index<br>[BMI] 40 or greater,<br>adult            | 3,792  | 7.8%  | <0.00<br>1 | 0.027  |
| 2 |        |                                                             | 3,443  | 7.1%  |            |        |
| 1 | Z68.25 | Body mass index<br>[BMI] 25.0-25.9,<br>adult                | 156    | 0.3%  | 0.775      | 0.002  |
| 2 |        |                                                             | 151    | 0.3%  |            |        |
| 1 | Z68.26 | Body mass index<br>[BMI] 26.0-26.9,<br>adult                | 171    | 0.4%  | 0.957      | <0.001 |
| 2 |        |                                                             | 172    | 0.4%  |            |        |
| 1 | Z68.27 | Body mass index<br>[BMI] 27.0-27.9,<br>adult                | 285    | 0.6%  | 0.005      | 0.018  |
| 2 |        |                                                             | 222    | 0.5%  |            |        |
| 1 | Z68.28 | Body mass index<br>[BMI] 28.0-28.9,<br>adult                | 335    | 0.7%  | 0.019      | 0.015  |
| 2 |        |                                                             | 277    | 0.6%  |            |        |
| 1 | Z68.29 | Body mass index<br>[BMI] 29.0-29.9,<br>adult                | 385    | 0.8%  | 0.101      | 0.011  |
| 2 |        |                                                             | 341    | 0.7%  |            |        |
| 1 | Z80    | Family history of<br>primary malignant<br>neoplasm          | 1,997  | 4.1%  | 0.105      | 0.010  |
| 2 |        |                                                             | 1,898  | 3.9%  |            |        |
| 1 | Z15.0  | Genetic<br>susceptibility to<br>malignant neoplasm          | 22     | 0.0%  | 0.055      | 0.012  |
| 2 |        |                                                             | 11     | 0.0%  |            |        |
| 1 | Z12    | Encounter for<br>screening for<br>malignant neoplasms       | 11,975 | 24.7% | 0.005      | 0.018  |
| 2 |        |                                                             | 11,599 | 23.9% |            |        |
| 1 | Z85    | Personal history of<br>malignant neoplasm                   | 1,232  | 2.5%  | <0.00<br>1 | 0.027  |
| 2 |        |                                                             | 1,034  | 2.1%  |            |        |
| 1 | Z98.84 | Bariatric surgery<br>status                                 | 614    | 1.3%  | 0.954      | <0.001 |
| 2 |        |                                                             | 616    | 1.3%  |            |        |
| 1 | E66.0  | Obesity due to<br>excess calories                           | 8,948  | 18.4% | 0.486      | 0.004  |
| 2 |        |                                                             | 8,864  | 18.3% |            |        |
| 1 | E66.2  | Morbid (severe)<br>obesity with alveolar<br>hypoventilation | 147    | 0.3%  | 0.816      | 0.001  |
| 2 |        |                                                             | 151    | 0.3%  |            |        |
| 1 | E66.3  | Overweight                                                  | 982    | 2.0%  | 0.009      | 0.017  |
| 2 |        |                                                             | 870    | 1.8%  |            |        |
| 1 | E66.8  | Other obesity                                               | 226    | 0.5%  | 0.011      | 0.016  |
| 2 |        |                                                             | 175    | 0.4%  |            |        |

|                   |       |                                                                                                                                                 |           |          |            |         |       |
|-------------------|-------|-------------------------------------------------------------------------------------------------------------------------------------------------|-----------|----------|------------|---------|-------|
| 1                 | E66.9 | Obesity, unspecified                                                                                                                            |           | 13,514   | 27.8%      | 0.017   | 0.015 |
| 2                 |       |                                                                                                                                                 |           | 13,850   | 28.5%      |         |       |
| 1                 | D34   | Benign neoplasm of thyroid gland                                                                                                                |           | 62       | 0.1%       | 0.580   | 0.004 |
| 2                 |       |                                                                                                                                                 |           | 56       | 0.1%       |         |       |
| <b>Procedure</b>  |       |                                                                                                                                                 |           |          |            |         |       |
| Group             |       |                                                                                                                                                 | Mean ± SD | Patients | % of Group | P-Value | SMD   |
| 1                 | 10278 | Hereditary neuroendocrine tumor disorders (eg, medullary thyroid carcinoma, parathyroid carcinoma, malignant pheochromocytoma or paraganglioma) |           | 0        | 0%         | --      | --    |
| 2                 | 53    |                                                                                                                                                 |           | 0        | 0%         |         |       |
| 1                 | 1001  | Radiation                                                                                                                                       |           | 138      | 0.3%       | 0.320   | 0.006 |
| 2                 |       |                                                                                                                                                 |           | 155      | 0.3%       |         |       |
| <b>Medication</b> |       |                                                                                                                                                 |           |          |            |         |       |
| Group             |       |                                                                                                                                                 | Mean ± SD | Patients | % of Group | P-Value | SMD   |
| 1                 | A10B  | Biguanides                                                                                                                                      |           | 26,621   | 54.9%      | 0.036   | 0.013 |
| 2                 | A     |                                                                                                                                                 |           | 26,945   | 55.5%      |         |       |
| 1                 | A10B  | Sulfonylureas                                                                                                                                   |           | 13,798   | 28.4%      | 0.010   | 0.017 |
| 2                 | B     |                                                                                                                                                 |           | 14,163   | 29.2%      |         |       |
| 1                 | A10B  | Alpha glucosidase inhibitors                                                                                                                    |           | 222      | 0.5%       | 0.074   | 0.011 |
| 2                 | F     |                                                                                                                                                 |           | 186      | 0.4%       |         |       |
| 1                 | A10B  | Thiazolidinediones                                                                                                                              |           | 4,033    | 8.3%       | 0.243   | 0.007 |
| 2                 | G     |                                                                                                                                                 |           | 4,134    | 8.5%       |         |       |
| 1                 | A10B  | Dipeptidyl peptidase 4 (DPP-4) inhibitors                                                                                                       |           | 9,131    | 18.8%      | 0.501   | 0.004 |
| 2                 | H     |                                                                                                                                                 |           | 9,213    | 19.0%      |         |       |
| 1                 | A10B  | Sodium-glucose co-transporter 2 (SGLT2) inhibitors                                                                                              |           | 4,366    | 9.0%       | <0.001  | 0.029 |
| 2                 | K     |                                                                                                                                                 |           | 3,968    | 8.2%       |         |       |
| 1                 | A10B  | Other blood glucose lowering drugs, excl. insulins                                                                                              |           | 607      | 1.3%       | 0.092   | 0.011 |
| 2                 | X     |                                                                                                                                                 |           | 550      | 1.1%       |         |       |

**eTable 12.** Characteristics of the GLP-1RA/no insulin group and insulin/no GLP-1RA group before and after matched for covariates related to meningioma for the study populations of patients with T2D and no history of any OAC

| <b>Group 1 (N = 48,983) and group 2 (N = 1,044,745) characteristics before propensity score matching</b> |        |                                           |           |            |         |       |
|----------------------------------------------------------------------------------------------------------|--------|-------------------------------------------|-----------|------------|---------|-------|
| <b>Demographics</b>                                                                                      |        |                                           |           |            |         |       |
| Group                                                                                                    |        | Mean ± SD                                 | Patients  | % of Group | P-Value | SMD   |
| 1                                                                                                        | AI     | Age at Index                              | 48,983    | 100%       | <0.00   | 0.420 |
| 2                                                                                                        |        |                                           | 1,044,745 | 100%       | 1       |       |
| 1                                                                                                        | 2106-3 | White                                     | 32,592    | 66.5%      | <0.00   | 0.122 |
| 2                                                                                                        |        |                                           | 633,989   | 60.7%      | 1       |       |
| 1                                                                                                        | 1002-5 | American Indian or Alaska Native          | 199       | 0.4%       | 0.004   | 0.013 |
| 2                                                                                                        |        |                                           | 3,443     | 0.3%       |         |       |
| 1                                                                                                        | UNK    | Unknown Race                              | 7,099     | 14.5%      | <0.00   | 0.025 |
| 2                                                                                                        |        |                                           | 142,470   | 13.6%      | 1       |       |
| 1                                                                                                        | F      | Female                                    | 26,011    | 53.1%      | <0.00   | 0.151 |
| 2                                                                                                        |        |                                           | 476,110   | 45.6%      | 1       |       |
| 1                                                                                                        | 2076-8 | Native Hawaiian or Other Pacific Islander | 205       | 0.4%       | <0.00   | 0.071 |
| 2                                                                                                        |        |                                           | 10,677    | 1.0%       | 1       |       |
| 1                                                                                                        | UN     | Unknown Gender                            | 2,252     | 4.6%       | <0.00   | 0.106 |
| 2                                                                                                        |        |                                           | 27,321    | 2.6%       | 1       |       |
| 1                                                                                                        | 2186-5 | Not Hispanic or Latino                    | 33,188    | 67.8%      | <0.00   | 0.098 |
| 2                                                                                                        |        |                                           | 659,375   | 63.1%      | 1       |       |
| 1                                                                                                        | 2135-2 | Hispanic or Latino                        | 4,151     | 8.5%       | <0.00   | 0.019 |
| 2                                                                                                        |        |                                           | 94,136    | 9.0%       | 1       |       |
| 1                                                                                                        | 2054-5 | Black or African American                 | 6,265     | 12.8%      | <0.00   | 0.120 |
| 2                                                                                                        |        |                                           | 178,267   | 17.1%      | 1       |       |
| 1                                                                                                        | M      | Male                                      | 20,720    | 42.3%      | <0.00   | 0.191 |
| 2                                                                                                        |        |                                           | 541,314   | 51.8%      | 1       |       |
| 1                                                                                                        | 2028-9 | Asian                                     | 1,204     | 2.5%       | <0.00   | 0.087 |
| 2                                                                                                        |        |                                           | 41,822    | 4.0%       | 1       |       |
| <b>Diagnosis</b>                                                                                         |        |                                           |           |            |         |       |
| Group                                                                                                    |        | Mean ± SD                                 | Patients  | % of Group | P-Value | SMD   |
| 1                                                                                                        | Z55-   | Persons with potential health             | 686       | 1.4%       | <0.00   | 0.022 |
| 2                                                                                                        | Z65    | hazards related to socioeconomic and      | 12,021    | 1.2%       | 1       |       |



|   |        | psychosocial<br>circumstances                         |         |       |       |        |
|---|--------|-------------------------------------------------------|---------|-------|-------|--------|
| 1 | E66    | Overweight and obesity                                | 18,401  | 37.6% | <0.00 | 0.504  |
| 2 |        |                                                       | 166,445 | 15.9% | 1     |        |
| 1 | Z68.3  | Body mass index [BMI] 30-39, adult                    | 4,204   | 8.6%  | <0.00 | 0.183  |
| 2 |        |                                                       | 43,128  | 4.1%  | 1     |        |
| 1 | Z68.4  | Body mass index [BMI] 40 or greater, adult            | 3,886   | 7.9%  | <0.00 | 0.208  |
| 2 |        |                                                       | 33,396  | 3.2%  | 1     |        |
| 1 | Z68.25 | Body mass index [BMI] 25.0-25.9, adult                | 157     | 0.3%  | 0.563 | 0.003  |
| 2 |        |                                                       | 3,510   | 0.3%  |       |        |
| 1 | Z68.26 | Body mass index [BMI] 26.0-26.9, adult                | 171     | 0.3%  | 0.957 | <0.001 |
| 2 |        |                                                       | 3,632   | 0.3%  |       |        |
| 1 | Z68.27 | Body mass index [BMI] 27.0-27.9, adult                | 288     | 0.6%  | <0.00 | 0.026  |
| 2 |        |                                                       | 4,209   | 0.4%  | 1     |        |
| 1 | Z68.28 | Body mass index [BMI] 28.0-28.9, adult                | 344     | 0.7%  | <0.00 | 0.036  |
| 2 |        |                                                       | 4,508   | 0.4%  | 1     |        |
| 1 | Z68.29 | Body mass index [BMI] 29.0-29.9, adult                | 398     | 0.8%  | <0.00 | 0.044  |
| 2 |        |                                                       | 4,843   | 0.5%  | 1     |        |
| 1 | Z80    | Family history of primary malignant neoplasm          | 2,042   | 4.2%  | <0.00 | 0.136  |
| 2 |        |                                                       | 19,398  | 1.9%  | 1     |        |
| 1 | Z15.0  | Genetic susceptibility to malignant neoplasm          | 24      | 0.0%  | <0.00 | 0.019  |
| 2 |        |                                                       | 156     | 0.0%  | 1     |        |
| 1 | Z12    | Encounter for screening for malignant neoplasms       | 12,272  | 25.1% | <0.00 | 0.402  |
| 2 |        |                                                       | 105,217 | 10.1% | 1     |        |
| 1 | Z85    | Personal history of malignant neoplasm                | 1,239   | 2.5%  | <0.00 | 0.066  |
| 2 |        |                                                       | 38,294  | 3.7%  | 1     |        |
| 1 | Z98.84 | Bariatric surgery status                              | 632     | 1.3%  | <0.00 | 0.085  |
| 2 |        |                                                       | 5,136   | 0.5%  | 1     |        |
| 1 | E66.0  | Obesity due to excess calories                        | 9,157   | 18.7% | <0.00 | 0.366  |
| 2 |        |                                                       | 69,998  | 6.7%  | 1     |        |
| 1 | E66.2  | Morbid (severe) obesity with alveolar hypoventilation | 150     | 0.3%  | 0.118 | 0.007  |
| 2 |        |                                                       | 3,643   | 0.3%  |       |        |

|   |        |                                 |         |       |       |       |
|---|--------|---------------------------------|---------|-------|-------|-------|
| 1 | E66.3  | Overweight                      | 1,010   | 2.1%  | <0.00 | 0.122 |
| 2 |        |                                 | 6,796   | 0.7%  | 1     |       |
| 1 | E66.8  | Other obesity                   | 235     | 0.5%  | <0.00 | 0.065 |
| 2 |        |                                 | 1,298   | 0.1%  | 1     |       |
| 1 | E66.9  | Obesity, unspecified            | 13,805  | 28.2% | <0.00 | 0.433 |
| 2 |        |                                 | 118,555 | 11.3% | 1     |       |
| 1 | Z79.89 | Hormone                         | 147     | 0.3%  | <0.00 | 0.032 |
| 2 | 0      | replacement therapy             | 1,533   | 0.1%  | 1     |       |
| 1 | Z92.23 | Personal history of             | 10      | 0.0%  | 0.116 | 0.006 |
| 2 |        | estrogen therapy                | 128     | 0.0%  |       |       |
| 1 | D32    | Benign neoplasm of              | 90      | 0.2%  | <0.00 | 0.025 |
| 2 |        | meninges                        | 3,214   | 0.3%  | 1     |       |
| 1 | S00-   | Injuries to the head            | 2,121   | 4.3%  | <0.00 | 0.060 |
| 2 | S09    |                                 | 58,791  | 5.6%  | 1     |       |
| 1 | Z80.3  | Family history of               | 804     | 1.6%  | <0.00 | 0.103 |
| 2 |        | malignant neoplasm<br>of breast | 5,952   | 0.6%  | 1     |       |

#### Procedure

| Group | Mean ± SD | Patients | % of Group | P-Value | SMD   |
|-------|-----------|----------|------------|---------|-------|
| 1     |           | 138      | 0.3%       | <0.00   | 0.063 |
| 2     | 1001      | 7,649    | 0.7%       | 1       |       |
|       |           |          |            |         |       |

#### Medication

| Group | Mean ± SD | Patients | % of Group | P-Value | SMD   |
|-------|-----------|----------|------------|---------|-------|
| 1     | A10B      | 27,075   | 55.3%      | <0.00   | 0.806 |
| 2     | A         | 199,802  | 19.1%      | 1       |       |
|       |           |          |            |         |       |
| 1     | A10B      | 14,077   | 28.7%      | <0.00   | 0.424 |
| 2     | B         | 125,703  | 12.0%      | 1       |       |
|       |           |          |            |         |       |
| 1     | A10B      | 229      | 0.5%       | <0.00   | 0.054 |
| 2     | F         | 1,718    | 0.2%       | 1       |       |
|       |           |          |            |         |       |
| 1     | A10B      | 4,107    | 8.4%       | <0.00   | 0.213 |
| 2     | G         | 35,435   | 3.4%       | 1       |       |
|       |           |          |            |         |       |
| 1     | A10B      | 9,485    | 19.4%      | <0.00   | 0.481 |
| 2     | H         | 44,595   | 4.3%       | 1       |       |
|       |           |          |            |         |       |
| 1     | A10B      | 4,808    | 9.8%       | <0.00   | 0.423 |
| 2     | K         | 6,447    | 0.6%       | 1       |       |
|       |           |          |            |         |       |
| 1     | A10B      | 614      | 1.3%       | <0.00   | 0.059 |
| 2     | X         | 7,048    | 0.7%       | 1       |       |
|       |           |          |            |         |       |

|   |       |               |  |       |      |       |       |
|---|-------|---------------|--|-------|------|-------|-------|
| 1 | HS200 | CONTRACEPTIVE |  | 1,436 | 2.9% | <0.00 |       |
| 2 |       | S,SYSTEMIC    |  | 5,500 | 0.5% | 1     | 0.185 |

**Group 1 (N = 48,518) and group 2 (N = 48,518) characteristics after propensity score matching**

**Demographics**

| Group |        | Mean ± SD                                 | Patients | % of Group | P-Value | SMD   |
|-------|--------|-------------------------------------------|----------|------------|---------|-------|
| 1     | AI     | Age at Index                              | 48,518   | 100%       | 0.361   | 0.006 |
| 2     |        |                                           | 48,518   | 100%       |         |       |
| 1     | 2106-3 | White                                     | 32,296   | 66.6%      | <0.00   | 0.042 |
| 2     |        |                                           | 33,257   | 68.5%      | 1       |       |
| 1     | 1002-5 | American Indian or Alaska Native          | 197      | 0.4%       | 0.300   | 0.007 |
| 2     |        |                                           | 177      | 0.4%       |         |       |
| 1     | UNK    | Unknown Race                              | 6,995    | 14.4%      | 0.001   | 0.022 |
| 2     |        |                                           | 6,626    | 13.7%      |         |       |
| 1     | F      | Female                                    | 25,736   | 53.0%      | 0.001   | 0.022 |
| 2     |        |                                           | 26,259   | 54.1%      |         |       |
| 1     | 2076-8 | Native Hawaiian or Other Pacific Islander | 205      | 0.4%       | 0.007   | 0.017 |
| 2     |        |                                           | 154      | 0.3%       |         |       |
| 1     | UN     | Unknown Gender                            | 2,182    | 4.5%       | 0.010   | 0.017 |
| 2     |        |                                           | 2,018    | 4.2%       |         |       |
| 1     | 2186-5 | Not Hispanic or Latino                    | 32,879   | 67.8%      | 0.019   | 0.015 |
| 2     |        |                                           | 33,219   | 68.5%      |         |       |
| 1     | 2135-2 | Hispanic or Latino                        | 4,118    | 8.5%       | 0.669   | 0.003 |
| 2     |        |                                           | 4,081    | 8.4%       |         |       |
| 1     | 2054-5 | Black or African American                 | 6,222    | 12.8%      | 0.003   | 0.019 |
| 2     |        |                                           | 5,915    | 12.2%      |         |       |
| 1     | M      | Male                                      | 20,600   | 42.5%      | 0.020   | 0.015 |
| 2     |        |                                           | 20,241   | 41.7%      |         |       |
| 1     | 2028-9 | Asian                                     | 1,195    | 2.5%       | 0.006   | 0.017 |
| 2     |        |                                           | 1,067    | 2.2%       |         |       |

**Diagnosis**

| Group |      | Mean ± SD                                                                                     | Patients | % of Group | P-Value | SMD   |
|-------|------|-----------------------------------------------------------------------------------------------|----------|------------|---------|-------|
| 1     | Z55- | Persons with potential health hazards related to socioeconomic and psychosocial circumstances | 681      | 1.4%       | 0.002   | 0.020 |
| 2     | Z65  |                                                                                               | 570      | 1.2%       |         |       |

|   |        |                                                       |        |       |        |       |
|---|--------|-------------------------------------------------------|--------|-------|--------|-------|
| 1 | E66    | Overweight and obesity                                | 18,033 | 37.2% | 0.889  | 0.001 |
| 2 |        |                                                       | 18,054 | 37.2% |        |       |
| 1 | Z68.3  | Body mass index [BMI] 30-39, adult                    | 4,068  | 8.4%  | <0.001 | 0.028 |
| 2 |        |                                                       | 3,696  | 7.6%  |        |       |
| 1 | Z68.4  | Body mass index [BMI] 40 or greater, adult            | 3,789  | 7.8%  | <0.001 | 0.029 |
| 2 |        |                                                       | 3,420  | 7.0%  |        |       |
| 1 | Z68.25 | Body mass index [BMI] 25.0-25.9, adult                | 156    | 0.3%  | 0.352  | 0.006 |
| 2 |        |                                                       | 140    | 0.3%  |        |       |
| 1 | Z68.26 | Body mass index [BMI] 26.0-26.9, adult                | 171    | 0.4%  | 0.317  | 0.006 |
| 2 |        |                                                       | 153    | 0.3%  |        |       |
| 1 | Z68.27 | Body mass index [BMI] 27.0-27.9, adult                | 283    | 0.6%  | 0.043  | 0.013 |
| 2 |        |                                                       | 237    | 0.5%  |        |       |
| 1 | Z68.28 | Body mass index [BMI] 28.0-28.9, adult                | 334    | 0.7%  | 0.077  | 0.011 |
| 2 |        |                                                       | 290    | 0.6%  |        |       |
| 1 | Z68.29 | Body mass index [BMI] 29.0-29.9, adult                | 386    | 0.8%  | 0.238  | 0.008 |
| 2 |        |                                                       | 354    | 0.7%  |        |       |
| 1 | Z80    | Family history of primary malignant neoplasm          | 1,995  | 4.1%  | 0.016  | 0.016 |
| 2 |        |                                                       | 1,848  | 3.8%  |        |       |
| 1 | Z15.0  | Genetic susceptibility to malignant neoplasm          | 23     | 0.0%  | 0.024  | 0.015 |
| 2 |        |                                                       | 10     | 0.0%  |        |       |
| 1 | Z12    | Encounter for screening for malignant neoplasms       | 11,961 | 24.7% | 0.011  | 0.016 |
| 2 |        |                                                       | 11,622 | 24.0% |        |       |
| 1 | Z85    | Personal history of malignant neoplasm                | 1,232  | 2.5%  | 0.002  | 0.020 |
| 2 |        |                                                       | 1,084  | 2.2%  |        |       |
| 1 | Z98.84 | Bariatric surgery status                              | 614    | 1.3%  | 0.160  | 0.009 |
| 2 |        |                                                       | 566    | 1.2%  |        |       |
| 1 | E66.0  | Obesity due to excess calories                        | 8,936  | 18.4% | 0.642  | 0.003 |
| 2 |        |                                                       | 8,880  | 18.3% |        |       |
| 1 | E66.2  | Morbid (severe) obesity with alveolar hypoventilation | 149    | 0.3%  | 0.036  | 0.013 |
| 2 |        |                                                       | 115    | 0.2%  |        |       |
| 1 | E66.3  | Overweight                                            | 981    | 2.0%  | 0.030  | 0.014 |
| 2 |        |                                                       | 888    | 1.8%  |        |       |

|   |        |                              |        |       |       |       |
|---|--------|------------------------------|--------|-------|-------|-------|
| 1 | E66.8  | Other obesity                | 222    | 0.5%  | 0.499 | 0.004 |
| 2 |        |                              | 208    | 0.4%  |       |       |
| 1 | E66.9  | Obesity, unspecified         | 13,501 | 27.8% | 0.506 | 0.004 |
| 2 |        |                              | 13,594 | 28.0% |       |       |
| 1 | Z79.89 | Hormone                      | 146    | 0.3%  | 0.180 | 0.009 |
| 2 | 0      | replacement therapy          | 124    | 0.3%  |       |       |
| 1 | Z92.23 | Personal history of          | 10     | 0.0%  | 0.532 | 0.004 |
| 2 |        | estrogen therapy             | 13     | 0.0%  |       |       |
| 1 | D32    | Benign neoplasm of           | 90     | 0.2%  | 0.397 | 0.005 |
| 2 |        | meninges                     | 79     | 0.2%  |       |       |
| 1 | S00-   | Injuries to the head         | 2,108  | 4.3%  | <0.00 | 0.032 |
| 2 | S09    |                              | 1,800  | 3.7%  |       |       |
| 1 | Z80.3  | Family history of            | 783    | 1.6%  | 0.354 | 0.006 |
| 2 |        | malignant neoplasm of breast | 747    | 1.5%  |       |       |

### Procedure

| Group | Mean ± SD | Patients | % of Group | P-Value | SMD   |
|-------|-----------|----------|------------|---------|-------|
| 1     |           | 138      | 0.3%       | 0.006   | 0.018 |
| 2     |           | 96       | 0.2%       |         |       |

### Medication

| Group | Mean ± SD | Patients | % of Group | P-Value | SMD   |
|-------|-----------|----------|------------|---------|-------|
| 1     | A10B      | 26,612   | 54.8%      | 0.006   | 0.018 |
| 2     |           | A        | 27,037     |         |       |
| 1     | A10B      | 13,794   | 28.4%      | 0.036   | 0.013 |
| 2     |           | B        | 14,089     |         |       |
| 1     | A10B      | 221      | 0.5%       | 0.092   | 0.011 |
| 2     |           | F        | 187        |         |       |
| 1     | A10B      | 4,037    | 8.3%       | 0.262   | 0.007 |
| 2     |           | G        | 4,134      |         |       |
| 1     | A10B      | 9,126    | 18.8%      | 0.831   | 0.001 |
| 2     |           | H        | 9,152      |         |       |
| 1     | A10B      | 4,364    | 9.0%       | <0.00   | 0.036 |
| 2     |           | K        | 3,874      |         |       |
| 1     | A10B      | 606      | 1.2%       | 0.663   | 0.003 |
| 2     |           | X        | 591        |         |       |
| 1     | HS200     | 1,385    | 2.9%       | 0.028   | 0.014 |
| 2     |           |          | 1,273      |         |       |

**eTable 13.** Characteristics of the GLP-1RA/no insulin group and insulin/no GLP-1RA group before and after matched for covariates related to multiple myeloma for the study populations of patients with T2D and no history of any OAC

**Group 1 (N = 48,983) and group 2 (N = 1,044,745) characteristics before propensity score matching**

| <b>Demographics</b> |        |                                                                    |           |            |         |       |
|---------------------|--------|--------------------------------------------------------------------|-----------|------------|---------|-------|
| Group               |        | Mean ± SD                                                          | Patients  | % of Group | P-Value | SMD   |
| 1                   | AI     | Age at Index                                                       | 48,983    | 100%       | <0.00   | 0.420 |
| 2                   |        |                                                                    | 1,044,745 | 100%       | 1       |       |
| 1                   | 2106-3 | White                                                              | 32,592    | 66.5%      | <0.00   | 0.122 |
| 2                   |        |                                                                    | 633,989   | 60.7%      | 1       |       |
| 1                   | 1002-5 | American Indian or Alaska Native                                   | 199       | 0.4%       | 0.004   | 0.013 |
| 2                   |        |                                                                    | 3,443     | 0.3%       |         |       |
| 1                   | UNK    | Unknown Race                                                       | 7,099     | 14.5%      | <0.00   | 0.025 |
| 2                   |        |                                                                    | 142,470   | 13.6%      | 1       |       |
| 1                   | F      | Female                                                             | 26,011    | 53.1%      | <0.00   | 0.151 |
| 2                   |        |                                                                    | 476,110   | 45.6%      | 1       |       |
| 1                   | 2076-8 | Native Hawaiian or Other Pacific Islander                          | 205       | 0.4%       | <0.00   | 0.071 |
| 2                   |        |                                                                    | 10,677    | 1.0%       | 1       |       |
| 1                   | UN     | Unknown Gender                                                     | 2,252     | 4.6%       | <0.00   | 0.106 |
| 2                   |        |                                                                    | 27,321    | 2.6%       | 1       |       |
| 1                   | 2186-5 | Not Hispanic or Latino                                             | 33,188    | 67.8%      | <0.00   | 0.098 |
| 2                   |        |                                                                    | 659,375   | 63.1%      | 1       |       |
| 1                   | 2135-2 | Hispanic or Latino                                                 | 4,151     | 8.5%       | <0.00   | 0.019 |
| 2                   |        |                                                                    | 94,136    | 9.0%       | 1       |       |
| 1                   | 2054-5 | Black or African American                                          | 6,265     | 12.8%      | <0.00   | 0.120 |
| 2                   |        |                                                                    | 178,267   | 17.1%      | 1       |       |
| 1                   | M      | Male                                                               | 20,720    | 42.3%      | <0.00   | 0.191 |
| 2                   |        |                                                                    | 541,314   | 51.8%      | 1       |       |
| 1                   | 2028-9 | Asian                                                              | 1,204     | 2.5%       | <0.00   | 0.087 |
| 2                   |        |                                                                    | 41,822    | 4.0%       | 1       |       |
| <b>Diagnosis</b>    |        |                                                                    |           |            |         |       |
| Group               |        | Mean ± SD                                                          | Patients  | % of Group | P-Value | SMD   |
| 1                   | Z55-   | Persons with potential health hazards related to socioeconomic and | 686       | 1.4%       | <0.00   | 0.022 |
| 2                   | Z65    |                                                                    | 12,021    | 1.2%       | 1       |       |

|   |        | psychosocial<br>circumstances                         |         |       |       |        |
|---|--------|-------------------------------------------------------|---------|-------|-------|--------|
| 1 | E66    | Overweight and obesity                                | 18,401  | 37.6% | <0.00 | 0.504  |
| 2 |        |                                                       | 166,445 | 15.9% | 1     |        |
| 1 | Z68.3  | Body mass index [BMI] 30-39, adult                    | 4,204   | 8.6%  | <0.00 | 0.183  |
| 2 |        |                                                       | 43,128  | 4.1%  | 1     |        |
| 1 | Z68.4  | Body mass index [BMI] 40 or greater, adult            | 3,886   | 7.9%  | <0.00 | 0.208  |
| 2 |        |                                                       | 33,396  | 3.2%  | 1     |        |
| 1 | Z68.25 | Body mass index [BMI] 25.0-25.9, adult                | 157     | 0.3%  | 0.563 | 0.003  |
| 2 |        |                                                       | 3,510   | 0.3%  |       |        |
| 1 | Z68.26 | Body mass index [BMI] 26.0-26.9, adult                | 171     | 0.3%  | 0.957 | <0.001 |
| 2 |        |                                                       | 3,632   | 0.3%  |       |        |
| 1 | Z68.27 | Body mass index [BMI] 27.0-27.9, adult                | 288     | 0.6%  | <0.00 | 0.026  |
| 2 |        |                                                       | 4,209   | 0.4%  | 1     |        |
| 1 | Z68.28 | Body mass index [BMI] 28.0-28.9, adult                | 344     | 0.7%  | <0.00 | 0.036  |
| 2 |        |                                                       | 4,508   | 0.4%  | 1     |        |
| 1 | Z68.29 | Body mass index [BMI] 29.0-29.9, adult                | 398     | 0.8%  | <0.00 | 0.044  |
| 2 |        |                                                       | 4,843   | 0.5%  | 1     |        |
| 1 | Z80    | Family history of primary malignant neoplasm          | 2,042   | 4.2%  | <0.00 | 0.136  |
| 2 |        |                                                       | 19,398  | 1.9%  | 1     |        |
| 1 | Z15.0  | Genetic susceptibility to malignant neoplasm          | 24      | 0.0%  | <0.00 | 0.019  |
| 2 |        |                                                       | 156     | 0.0%  | 1     |        |
| 1 | Z12    | Encounter for screening for malignant neoplasms       | 12,272  | 25.1% | <0.00 | 0.402  |
| 2 |        |                                                       | 105,217 | 10.1% | 1     |        |
| 1 | Z85    | Personal history of malignant neoplasm                | 1,239   | 2.5%  | <0.00 | 0.066  |
| 2 |        |                                                       | 38,294  | 3.7%  | 1     |        |
| 1 | Z98.84 | Bariatric surgery status                              | 632     | 1.3%  | <0.00 | 0.085  |
| 2 |        |                                                       | 5,136   | 0.5%  | 1     |        |
| 1 | E66.0  | Obesity due to excess calories                        | 9,157   | 18.7% | <0.00 | 0.366  |
| 2 |        |                                                       | 69,998  | 6.7%  | 1     |        |
| 1 | E66.2  | Morbid (severe) obesity with alveolar hypoventilation | 150     | 0.3%  | 0.118 | 0.007  |
| 2 |        |                                                       | 3,643   | 0.3%  |       |        |

|   |       |                                                                                            |         |       |       |       |
|---|-------|--------------------------------------------------------------------------------------------|---------|-------|-------|-------|
| 1 | E66.3 | Overweight                                                                                 | 1,010   | 2.1%  | <0.00 | 0.122 |
| 2 |       |                                                                                            | 6,796   | 0.7%  | 1     |       |
| 1 | E66.8 | Other obesity                                                                              | 235     | 0.5%  | <0.00 | 0.065 |
| 2 |       |                                                                                            | 1,298   | 0.1%  | 1     |       |
| 1 | E66.9 | Obesity, unspecified                                                                       | 13,805  | 28.2% | <0.00 | 0.433 |
| 2 |       |                                                                                            | 118,555 | 11.3% | 1     |       |
| 1 | Z80.7 | Family history of other malignant neoplasms of lymphoid, hematopoietic and related tissues | 20      | 0.0%  | 0.206 | 0.005 |
| 2 |       |                                                                                            | 319     | 0.0%  |       |       |
| 1 | D47.2 | Monoclonal gammopathy                                                                      | 96      | 0.2%  | 0.016 | 0.012 |
| 2 |       |                                                                                            | 2,627   | 0.3%  |       |       |
| 1 | C90.3 | Solitary plasmacytoma                                                                      | 10      | 0.0%  | <0.00 | 0.014 |
| 2 |       |                                                                                            | 50      | 0.0%  | 1     |       |
| 1 | D45   | Polycythemia vera                                                                          | 82      | 0.2%  | 0.030 | 0.009 |
| 2 |       |                                                                                            | 1,367   | 0.1%  |       |       |
| 1 | D46   | Myelodysplastic syndromes                                                                  | 19      | 0.0%  | <0.00 | 0.048 |
| 2 |       |                                                                                            | 2,139   | 0.2%  | 1     |       |
| 1 | D47   | Other neoplasms of uncertain behavior of lymphoid, hematopoietic and related tissue        | 281     | 0.6%  | 0.001 | 0.016 |
| 2 |       |                                                                                            | 7,366   | 0.7%  |       |       |

### Medication

| Group  | Mean ± SD | Patients | % of Group | P-Value | SMD   |
|--------|-----------|----------|------------|---------|-------|
| 1 A10B |           | 27,075   | 55.3%      | <0.00   | 0.806 |
| 2 A    |           | 199,802  | 19.1%      | 1       |       |
| 1 A10B |           | 14,077   | 28.7%      | <0.00   | 0.424 |
| 2 B    |           | 125,703  | 12.0%      | 1       |       |
| 1 A10B |           | 229      | 0.5%       | <0.00   | 0.054 |
| 2 F    |           | 1,718    | 0.2%       | 1       |       |
| 1 A10B |           | 4,107    | 8.4%       | <0.00   | 0.213 |
| 2 G    |           | 35,435   | 3.4%       | 1       |       |
| 1 A10B |           | 9,485    | 19.4%      | <0.00   | 0.481 |
| 2 H    |           | 44,595   | 4.3%       | 1       |       |
| 1 A10B |           | 4,808    | 9.8%       | <0.00   | 0.423 |
| 2 K    |           | 6,447    | 0.6%       | 1       |       |



|   |      |                                |       |      |       |       |
|---|------|--------------------------------|-------|------|-------|-------|
| 1 | A10B | Other blood glucose            | 614   | 1.3% | <0.00 | 0.059 |
| 2 | X    | lowering drugs, excl. insulins | 7,048 | 0.7% | 1     |       |

**Group 1 (N = 48,527) and group 2 (N = 48,527) characteristics after propensity score matching**

**Demographics**

| Group  | Mean ± SD | Patients                                  | % of Group                     | P-Value          | SMD            |                     |
|--------|-----------|-------------------------------------------|--------------------------------|------------------|----------------|---------------------|
| 1<br>2 | AI        | Age at Index                              | 55.9 +/- 11.7<br>56.1 +/- 13.0 | 48,527<br>48,527 | 100%<br>100%   | 0.057<br>0.012      |
| 1<br>2 | 2106-3    | White                                     |                                | 32,296<br>33,417 | 66.6%<br>68.9% | <0.00<br>1<br>0.049 |
| 1<br>2 | 1002-5    | American Indian or Alaska Native          |                                | 197<br>150       | 0.4%<br>0.3%   | 0.011<br>0.016      |
| 1<br>2 | UNK       | Unknown Race                              |                                | 6,995<br>6,585   | 14.4%<br>13.6% | <0.00<br>1<br>0.024 |
| 1<br>2 | F         | Female                                    |                                | 25,751<br>26,135 | 53.1%<br>53.9% | 0.013<br>0.016      |
| 1<br>2 | 2076-8    | Native Hawaiian or Other Pacific Islander |                                | 205<br>147       | 0.4%<br>0.3%   | 0.002<br>0.020      |
| 1<br>2 | UN        | Unknown Gender                            |                                | 2,183<br>2,029   | 4.5%<br>4.2%   | 0.015<br>0.016      |
| 1<br>2 | 2186-5    | Not Hispanic or Latino                    |                                | 32,881<br>33,326 | 67.8%<br>68.7% | 0.002<br>0.020      |
| 1<br>2 | 2135-2    | Hispanic or Latino                        |                                | 4,122<br>3,926   | 8.5%<br>8.1%   | 0.023<br>0.015      |
| 1<br>2 | 2054-5    | Black or African American                 |                                | 6,230<br>5,926   | 12.8%<br>12.2% | 0.003<br>0.019      |
| 1<br>2 | M         | Male                                      |                                | 20,593<br>20,363 | 42.4%<br>42.0% | 0.135<br>0.010      |
| 1<br>2 | 2028-9    | Asian                                     |                                | 1,197<br>1,015   | 2.5%<br>2.1%   | <0.00<br>1<br>0.025 |

**Diagnosis**

| Group  | Mean ± SD   | Patients                                                                                      | % of Group | P-Value    | SMD          |                |
|--------|-------------|-----------------------------------------------------------------------------------------------|------------|------------|--------------|----------------|
| 1<br>2 | Z55-<br>Z65 | Persons with potential health hazards related to socioeconomic and psychosocial circumstances |            | 682<br>582 | 1.4%<br>1.2% | 0.005<br>0.018 |

|   |        |                                                       |        |       |        |       |
|---|--------|-------------------------------------------------------|--------|-------|--------|-------|
| 1 | E66    | Overweight and obesity                                | 18,046 | 37.2% | 0.770  | 0.002 |
| 2 |        |                                                       | 18,090 | 37.3% |        |       |
| 1 | Z68.3  | Body mass index [BMI] 30-39, adult                    | 4,072  | 8.4%  | <0.001 | 0.025 |
| 2 |        |                                                       | 3,739  | 7.7%  |        |       |
| 1 | Z68.4  | Body mass index [BMI] 40 or greater, adult            | 3,794  | 7.8%  | <0.001 | 0.029 |
| 2 |        |                                                       | 3,424  | 7.1%  |        |       |
| 1 | Z68.25 | Body mass index [BMI] 25.0-25.9, adult                | 156    | 0.3%  | 0.218  | 0.008 |
| 2 |        |                                                       | 135    | 0.3%  |        |       |
| 1 | Z68.26 | Body mass index [BMI] 26.0-26.9, adult                | 171    | 0.4%  | 0.545  | 0.004 |
| 2 |        |                                                       | 160    | 0.3%  |        |       |
| 1 | Z68.27 | Body mass index [BMI] 27.0-27.9, adult                | 284    | 0.6%  | 0.010  | 0.017 |
| 2 |        |                                                       | 226    | 0.5%  |        |       |
| 1 | Z68.28 | Body mass index [BMI] 28.0-28.9, adult                | 334    | 0.7%  | 0.036  | 0.013 |
| 2 |        |                                                       | 282    | 0.6%  |        |       |
| 1 | Z68.29 | Body mass index [BMI] 29.0-29.9, adult                | 385    | 0.8%  | 0.002  | 0.020 |
| 2 |        |                                                       | 305    | 0.6%  |        |       |
| 1 | Z80    | Family history of primary malignant neoplasm          | 1,997  | 4.1%  | 0.004  | 0.018 |
| 2 |        |                                                       | 1,823  | 3.8%  |        |       |
| 1 | Z15.0  | Genetic susceptibility to malignant neoplasm          | 22     | 0.0%  | 0.086  | 0.011 |
| 2 |        |                                                       | 12     | 0.0%  |        |       |
| 1 | Z12    | Encounter for screening for malignant neoplasms       | 11,973 | 24.7% | 0.003  | 0.019 |
| 2 |        |                                                       | 11,574 | 23.9% |        |       |
| 1 | Z85    | Personal history of malignant neoplasm                | 1,232  | 2.5%  | <0.001 | 0.024 |
| 2 |        |                                                       | 1,052  | 2.2%  |        |       |
| 1 | Z98.84 | Bariatric surgery status                              | 614    | 1.3%  | 0.178  | 0.009 |
| 2 |        |                                                       | 568    | 1.2%  |        |       |
| 1 | E66.0  | Obesity due to excess calories                        | 8,943  | 18.4% | 0.791  | 0.002 |
| 2 |        |                                                       | 8,911  | 18.4% |        |       |
| 1 | E66.2  | Morbid (severe) obesity with alveolar hypoventilation | 147    | 0.3%  | 0.566  | 0.004 |
| 2 |        |                                                       | 157    | 0.3%  |        |       |
| 1 | E66.3  | Overweight                                            | 984    | 2.0%  | 0.002  | 0.020 |
| 2 |        |                                                       | 850    | 1.8%  |        |       |

|   |       |                                                                                            |        |       |       |        |
|---|-------|--------------------------------------------------------------------------------------------|--------|-------|-------|--------|
| 1 | E66.8 | Other obesity                                                                              | 226    | 0.5%  | 0.011 | 0.016  |
| 2 |       |                                                                                            | 175    | 0.4%  |       |        |
| 1 | E66.9 | Obesity, unspecified                                                                       | 13,515 | 27.9% | 0.189 | 0.008  |
| 2 |       |                                                                                            | 13,699 | 28.2% |       |        |
| 1 | Z80.7 | Family history of other malignant neoplasms of lymphoid, hematopoietic and related tissues | 19     | 0.0%  | 0.873 | 0.001  |
| 2 |       |                                                                                            | 20     | 0.0%  |       |        |
| 1 | D47.2 | Monoclonal gammopathy                                                                      | 96     | 0.2%  | 0.053 | 0.012  |
| 2 |       |                                                                                            | 71     | 0.1%  |       |        |
| 1 | C90.3 | Solitary plasmacytoma                                                                      | 10     | 0.0%  | 1     | <0.001 |
| 2 |       |                                                                                            | 10     | 0.0%  |       |        |
| 1 | D45   | Polycythemia vera                                                                          | 79     | 0.2%  | 0.874 | 0.001  |
| 2 |       |                                                                                            | 81     | 0.2%  |       |        |
| 1 | D46   | Myelodysplastic syndromes                                                                  | 19     | 0.0%  | 0.002 | 0.020  |
| 2 |       |                                                                                            | 43     | 0.1%  |       |        |
| 1 | D47   | Other neoplasms of uncertain behavior of lymphoid, hematopoietic and related tissue        | 278    | 0.6%  | 0.077 | 0.011  |
| 2 |       |                                                                                            | 238    | 0.5%  |       |        |

### Medication

| Group  | Mean ± SD | Patients | % of Group | P-Value | SMD   |
|--------|-----------|----------|------------|---------|-------|
| 1 A10B |           | 26,622   | 54.9%      | 0.006   | 0.017 |
| 2 A    |           | 27,044   | 55.7%      |         |       |
| 1 A10B |           | 13,797   | 28.4%      | 0.027   | 0.014 |
| 2 B    |           | 14,109   | 29.1%      |         |       |
| 1 A10B |           | 222      | 0.5%       | 0.031   | 0.014 |
| 2 F    |           | 179      | 0.4%       |         |       |
| 1 A10B |           | 4,037    | 8.3%       | 0.487   | 0.004 |
| 2 G    |           | 4,097    | 8.4%       |         |       |
| 1 A10B |           | 9,133    | 18.8%      | 0.092   | 0.011 |
| 2 H    |           | 9,339    | 19.2%      |         |       |
| 1 A10B |           | 4,366    | 9.0%       | <0.001  | 0.033 |
| 2 K    |           | 3,914    | 8.1%       |         |       |
| 1 A10B |           | 606      | 1.2%       | 0.319   | 0.006 |
| 2 X    |           | 572      | 1.2%       |         |       |

eTable 14. Characteristics of the GLP-1RA/no metformin group and metformin/no GLP-1RA group before and after matched for covariates related to esophageal cancer for the study populations of patients with T2D and no history of any OAC

| <b>Group 1 (N = 32,365) and group 2 (N = 856,160) characteristics before propensity score matching</b> |        |                                                                    |               |          |            |         |       |
|--------------------------------------------------------------------------------------------------------|--------|--------------------------------------------------------------------|---------------|----------|------------|---------|-------|
| <b>Demographics</b>                                                                                    |        |                                                                    |               |          |            |         |       |
| Group                                                                                                  |        |                                                                    | Mean ± SD     | Patients | % of Group | P-Value | SMD   |
| 1                                                                                                      | AI     | Age at Index                                                       | 59.0 +/- 12.4 | 32,365   | 100%       | <0.00   | 0.080 |
| 2                                                                                                      |        |                                                                    | 60.1 +/- 14.0 | 856,160  | 100%       | 1       |       |
| 1                                                                                                      | 2106-3 | White                                                              |               | 21,231   | 65.6%      | <0.00   | 0.111 |
| 2                                                                                                      |        |                                                                    |               | 515,868  | 60.3%      | 1       |       |
| 1                                                                                                      | 1002-5 | American Indian or Alaska Native                                   |               | 98       | 0.3%       | 0.092   | 0.010 |
| 2                                                                                                      |        |                                                                    |               | 3,080    | 0.4%       |         |       |
| 1                                                                                                      | UNK    | Unknown Race                                                       |               | 4,272    | 13.2%      | <0.00   | 0.021 |
| 2                                                                                                      |        |                                                                    |               | 119,036  | 13.9%      | 1       |       |
| 1                                                                                                      | F      | Female                                                             |               | 17,278   | 53.4%      | <0.00   | 0.134 |
| 2                                                                                                      |        |                                                                    |               | 399,923  | 46.7%      | 1       |       |
| 1                                                                                                      | 2076-8 | Native Hawaiian or Other Pacific Islander                          |               | 172      | 0.5%       | 0.001   | 0.020 |
| 2                                                                                                      |        |                                                                    |               | 5,884    | 0.7%       |         |       |
| 1                                                                                                      | UN     | Unknown Gender                                                     |               | 1,670    | 5.2%       | <0.00   | 0.152 |
| 2                                                                                                      |        |                                                                    |               | 19,592   | 2.3%       | 1       |       |
| 1                                                                                                      | 2186-5 | Not Hispanic or Latino                                             |               | 22,299   | 68.9%      | <0.00   | 0.151 |
| 2                                                                                                      |        |                                                                    |               | 528,686  | 61.8%      | 1       |       |
| 1                                                                                                      | 2135-2 | Hispanic or Latino                                                 |               | 2,660    | 8.2%       | <0.00   | 0.084 |
| 2                                                                                                      |        |                                                                    |               | 91,303   | 10.7%      | 1       |       |
| 1                                                                                                      | 2054-5 | Black or African American                                          |               | 5,107    | 15.8%      | <0.00   | 0.021 |
| 2                                                                                                      |        |                                                                    |               | 141,606  | 16.5%      | 1       |       |
| 1                                                                                                      | M      | Male                                                               |               | 13,417   | 41.5%      | <0.00   | 0.192 |
| 2                                                                                                      |        |                                                                    |               | 436,645  | 51.0%      | 1       |       |
| 1                                                                                                      | 2028-9 | Asian                                                              |               | 681      | 2.1%       | <0.00   | 0.118 |
| 2                                                                                                      |        |                                                                    |               | 35,540   | 4.2%       | 1       |       |
| <b>Diagnosis</b>                                                                                       |        |                                                                    |               |          |            |         |       |
| Group                                                                                                  |        |                                                                    | Mean ± SD     | Patients | % of Group | P-Value | SMD   |
| 1                                                                                                      | Z55-   | Persons with potential health hazards related to socioeconomic and |               | 422      | 1.3%       | 0.107   | 0.009 |
| 2                                                                                                      | Z65    |                                                                    |               | 10,310   | 1.2%       |         |       |

|   |        | psychosocial<br>circumstances                         |         |       |       |       |
|---|--------|-------------------------------------------------------|---------|-------|-------|-------|
| 1 | E66    | Overweight and<br>obesity                             | 11,418  | 35.3% | <0.00 | 0.411 |
| 2 |        |                                                       | 149,974 | 17.5% | 1     |       |
| 1 | Z68.3  | Body mass index<br>[BMI] 30-39, adult                 | 3,285   | 10.1% | <0.00 | 0.249 |
| 2 |        |                                                       | 32,977  | 3.9%  | 1     |       |
| 1 | Z68.4  | Body mass index<br>[BMI] 40 or greater,<br>adult      | 3,012   | 9.3%  | <0.00 | 0.278 |
| 2 |        |                                                       | 23,535  | 2.7%  | 1     |       |
| 1 | Z68.25 | Body mass index<br>[BMI] 25.0-25.9,<br>adult          | 119     | 0.4%  | 0.001 | 0.018 |
| 2 |        |                                                       | 2,293   | 0.3%  |       |       |
| 1 | Z68.26 | Body mass index<br>[BMI] 26.0-26.9,<br>adult          | 150     | 0.5%  | <0.00 | 0.029 |
| 2 |        |                                                       | 2,433   | 0.3%  | 1     |       |
| 1 | Z68.27 | Body mass index<br>[BMI] 27.0-27.9,<br>adult          | 209     | 0.6%  | <0.00 | 0.043 |
| 2 |        |                                                       | 2,942   | 0.3%  | 1     |       |
| 1 | Z68.28 | Body mass index<br>[BMI] 28.0-28.9,<br>adult          | 264     | 0.8%  | <0.00 | 0.055 |
| 2 |        |                                                       | 3,317   | 0.4%  | 1     |       |
| 1 | Z68.29 | Body mass index<br>[BMI] 29.0-29.9,<br>adult          | 299     | 0.9%  | <0.00 | 0.059 |
| 2 |        |                                                       | 3,753   | 0.4%  | 1     |       |
| 1 | F10    | Alcohol related<br>disorders                          | 460     | 1.4%  | <0.00 | 0.076 |
| 2 |        |                                                       | 21,150  | 2.5%  | 1     |       |
| 1 | Z80    | Family history of<br>primary malignant<br>neoplasm    | 1,222   | 3.8%  | <0.00 | 0.114 |
| 2 |        |                                                       | 16,133  | 1.9%  | 1     |       |
| 1 | Z15.0  | Genetic<br>susceptibility to<br>malignant neoplasm    | 18      | 0.1%  | <0.00 | 0.021 |
| 2 |        |                                                       | 140     | 0.0%  | 1     |       |
| 1 | Z12    | Encounter for<br>screening for<br>malignant neoplasms | 6,223   | 19.2% | <0.00 | 0.157 |
| 2 |        |                                                       | 114,996 | 13.4% | 1     |       |
| 1 | Z85    | Personal history of<br>malignant neoplasm             | 1,111   | 3.4%  | <0.00 | 0.042 |
| 2 |        |                                                       | 23,231  | 2.7%  | 1     |       |
| 1 | Z98.84 | Bariatric surgery<br>status                           | 534     | 1.6%  | <0.00 | 0.131 |
| 2 |        |                                                       | 2,989   | 0.3%  | 1     |       |
| 1 | F17    | Nicotine dependence                                   | 2,399   | 7.4%  | <0.00 | 0.059 |
| 2 |        |                                                       | 77,335  | 9.0%  | 1     |       |

|   |        |                                                                                   |         |       |       |       |
|---|--------|-----------------------------------------------------------------------------------|---------|-------|-------|-------|
| 1 | E66.0  | Obesity due to excess calories                                                    | 5,910   | 18.3% | <0.00 | 0.361 |
| 2 |        |                                                                                   | 56,178  | 6.6%  | 1     |       |
| 1 | E66.2  | Morbid (severe) obesity with alveolar hypoventilation                             | 230     | 0.7%  | <0.00 | 0.069 |
| 2 |        |                                                                                   | 2,051   | 0.2%  | 1     |       |
| 1 | E66.3  | Overweight                                                                        | 535     | 1.7%  | <0.00 | 0.066 |
| 2 |        |                                                                                   | 7,794   | 0.9%  | 1     |       |
| 1 | E66.8  | Other obesity                                                                     | 193     | 0.6%  | <0.00 | 0.078 |
| 2 |        |                                                                                   | 1,084   | 0.1%  | 1     |       |
| 1 | E66.9  | Obesity, unspecified                                                              | 8,150   | 25.2% | <0.00 | 0.307 |
| 2 |        |                                                                                   | 113,380 | 13.2% | 1     |       |
| 1 | Z72.0  | Tobacco use                                                                       | 588     | 1.8%  | <0.00 | 0.034 |
| 2 |        |                                                                                   | 11,927  | 1.4%  | 1     |       |
| 1 | K21    | Gastro-esophageal reflux disease                                                  | 6,710   | 20.7% | <0.00 | 0.194 |
| 2 |        |                                                                                   | 115,166 | 13.5% | 1     |       |
| 1 | K22.7  | Barrett's esophagus                                                               | 244     | 0.8%  | <0.00 | 0.039 |
| 2 |        |                                                                                   | 3,863   | 0.5%  | 1     |       |
| 1 | K22.0  | Achalasia of cardia                                                               | 30      | 0.1%  | 0.001 | 0.016 |
| 2 |        |                                                                                   | 433     | 0.1%  |       |       |
| 1 | D69.4  | Evans syndrome                                                                    | 0       | 0%    | 0.409 | 0.006 |
| 2 |        |                                                                                   | 18      | 0.0%  |       |       |
| 1 | D50.1  | Sideropenic dysphagia                                                             | 57      | 0.2%  | <0.00 | 0.031 |
| 2 |        |                                                                                   | 573     | 0.1%  | 1     |       |
| 1 | S27.81 | Injury of esophagus (thoracic part)                                               | 10      | 0.0%  | <0.00 | 0.021 |
| 2 |        |                                                                                   | 33      | 0.0%  | 1     |       |
| 1 | C34    | Malignant neoplasm of bronchus and lung                                           | 99      | 0.3%  | <0.00 | 0.034 |
| 2 |        |                                                                                   | 4,460   | 0.5%  | 1     |       |
| 1 | C06    | Malignant neoplasm of other and unspecified parts of mouth                        | 10      | 0.0%  | 0.091 | 0.011 |
| 2 |        |                                                                                   | 451     | 0.1%  |       |       |
| 1 | C32    | Malignant neoplasm of larynx                                                      | 13      | 0.0%  | 0.005 | 0.018 |
| 2 |        |                                                                                   | 741     | 0.1%  |       |       |
| 1 | B97.7  | Papillomavirus as the cause of diseases classified elsewhere                      | 56      | 0.2%  | <0.00 | 0.018 |
| 2 |        |                                                                                   | 908     | 0.1%  | 1     |       |
| 1 | R87.8  | High risk human papillomavirus (HPV) DNA test positive from female genital organs | 59      | 0.2%  | <0.00 | 0.019 |
| 2 |        |                                                                                   | 928     | 0.1%  | 1     |       |

|   |       |                                                          |       |      |       |       |
|---|-------|----------------------------------------------------------|-------|------|-------|-------|
| 1 | Z80.0 | Family history of malignant neoplasm of digestive organs | 413   | 1.3% | <0.00 | 0.055 |
| 2 |       |                                                          | 6,255 | 0.7% | 1     |       |
| 1 | D10   | Benign neoplasm of mouth and pharynx                     | 38    | 0.1% | 0.619 | 0.003 |
| 2 |       |                                                          | 1,091 | 0.1% |       |       |
| 1 | D13.0 | Benign neoplasm of esophagus                             | 10    | 0.0% | 0.176 | 0.007 |
| 2 |       |                                                          | 171   | 0.0% |       |       |

### Medication

| Group |      |                                                    | Mean ± SD | Patients | % of Group | P-Value | SMD   |
|-------|------|----------------------------------------------------|-----------|----------|------------|---------|-------|
| 1     | A10B | Sulfonylureas                                      |           | 5,464    | 16.9%      | <0.00   | 0.269 |
| 2     | B    |                                                    |           | 69,045   | 8.1%       | 1       |       |
| 1     | A10B | Alpha glucosidase inhibitors                       |           | 124      | 0.4%       | <0.00   | 0.057 |
| 2     | F    |                                                    |           | 876      | 0.1%       | 1       |       |
| 1     | A10B | Thiazolidinediones                                 |           | 1,960    | 6.1%       | <0.00   | 0.183 |
| 2     | G    |                                                    |           | 20,400   | 2.4%       | 1       |       |
| 1     | A10B | Dipeptidyl peptidase 4 (DPP-4) inhibitors          |           | 3,547    | 11.0%      | <0.00   | 0.370 |
| 2     | H    |                                                    |           | 17,113   | 2.0%       | 1       |       |
| 1     | A10B | Sodium-glucose co-transporter 2 (SGLT2) inhibitors |           | 1,839    | 5.7%       | <0.00   | 0.312 |
| 2     | K    |                                                    |           | 3,371    | 0.4%       | 1       |       |
| 1     | A10B | Other blood glucose lowering drugs, excl. insulins |           | 672      | 2.1%       | <0.00   | 0.146 |
| 2     | X    |                                                    |           | 3,839    | 0.4%       | 1       |       |
| 1     | A10A | INSULINS AND ANALOGUES                             |           | 14,131   | 43.7%      | <0.00   | 0.560 |
| 2     |      |                                                    |           | 159,901  | 18.7%      | 1       |       |

### Group 1 (N = 32,263) and group 2 (N = 32,263) characteristics after propensity score matching

#### Demographics

| Group |        |                                  | Mean ± SD     | Patients | % of Group | P-Value | SMD   |
|-------|--------|----------------------------------|---------------|----------|------------|---------|-------|
| 1     | AI     | Age at Index                     | 59.0 +/- 12.4 | 32,263   | 100%       | 0.721   | 0.003 |
| 2     |        |                                  | 59.0 +/- 13.2 | 32,263   | 100%       |         |       |
| 1     | 2106-3 | White                            |               | 21,161   | 65.6%      | <0.00   | 0.037 |
| 2     |        |                                  |               | 21,731   | 67.4%      | 1       |       |
| 1     | 1002-5 | American Indian or Alaska Native |               | 98       | 0.3%       | 0.887   | 0.001 |
| 2     |        |                                  |               | 100      | 0.3%       |         |       |
| 1     | UNK    | Unknown Race                     |               | 4,255    | 13.2%      | 0.375   | 0.007 |
| 2     |        |                                  |               | 4,179    | 13.0%      |         |       |
| 1     | F      | Female                           |               | 17,209   | 53.3%      | 0.038   | 0.016 |
| 2     |        |                                  |               | 17,472   | 54.2%      |         |       |

|   |        |                                           |        |       |       |       |
|---|--------|-------------------------------------------|--------|-------|-------|-------|
| 1 | 2076-8 | Native Hawaiian or Other Pacific Islander | 172    | 0.5%  | 0.161 | 0.011 |
| 2 |        |                                           | 147    | 0.5%  |       |       |
| 1 | UN     | Unknown Gender                            | 1,656  | 5.1%  | 0.478 | 0.006 |
| 2 |        |                                           | 1,696  | 5.3%  |       |       |
| 1 | 2186-5 | Not Hispanic or Latino                    | 22,225 | 68.9% | 0.004 | 0.023 |
| 2 |        |                                           | 22,564 | 69.9% |       |       |
| 1 | 2135-2 | Hispanic or Latino                        | 2,651  | 8.2%  | 0.019 | 0.018 |
| 2 |        |                                           | 2,490  | 7.7%  |       |       |
| 1 | 2054-5 | Black or African American                 | 5,092  | 15.8% | 0.001 | 0.027 |
| 2 |        |                                           | 4,779  | 14.8% |       |       |
| 1 | M      | Male                                      | 13,398 | 41.5% | 0.015 | 0.019 |
| 2 |        |                                           | 13,095 | 40.6% |       |       |
| 1 | 2028-9 | Asian                                     | 681    | 2.1%  | 0.010 | 0.020 |
| 2 |        |                                           | 590    | 1.8%  |       |       |

### Diagnosis

| Group | Mean ± SD                                                                                     | Patients | % of Group | P-Value | SMD   |
|-------|-----------------------------------------------------------------------------------------------|----------|------------|---------|-------|
| 1     | Persons with potential health hazards related to socioeconomic and psychosocial circumstances | 419      | 1.3%       | 0.003   | 0.023 |
| 2     |                                                                                               | 339      | 1.1%       |         |       |
| 1     | E66                                                                                           | 11,341   | 35.2%      | 0.433   | 0.006 |
| 2     |                                                                                               | 11,246   | 34.9%      |         |       |
| 1     | Z68.3                                                                                         | 3,247    | 10.1%      | 0.763   | 0.002 |
| 2     |                                                                                               | 3,224    | 10.0%      |         |       |
| 1     | Z68.4                                                                                         | 2,969    | 9.2%       | 0.065   | 0.015 |
| 2     |                                                                                               | 2,835    | 8.8%       |         |       |
| 1     | Z68.25                                                                                        | 118      | 0.4%       | 0.463   | 0.006 |
| 2     |                                                                                               | 107      | 0.3%       |         |       |
| 1     | Z68.26                                                                                        | 149      | 0.5%       | 0.036   | 0.017 |
| 2     |                                                                                               | 115      | 0.4%       |         |       |
| 1     | Z68.27                                                                                        | 207      | 0.6%       | 0.169   | 0.011 |
| 2     |                                                                                               | 180      | 0.6%       |         |       |



|   |        |                                                       |       |       |        |        |
|---|--------|-------------------------------------------------------|-------|-------|--------|--------|
| 1 | Z68.28 | Body mass index [BMI] 28.0-28.9, adult                | 261   | 0.8%  | 0.175  | 0.011  |
| 2 |        |                                                       | 231   | 0.7%  |        |        |
| 1 | Z68.29 | Body mass index [BMI] 29.0-29.9, adult                | 297   | 0.9%  | 0.080  | 0.014  |
| 2 |        |                                                       | 256   | 0.8%  |        |        |
| 1 | F10    | Alcohol related disorders                             | 459   | 1.4%  | <0.001 | 0.039  |
| 2 |        |                                                       | 323   | 1.0%  |        |        |
| 1 | Z80    | Family history of primary malignant neoplasm          | 1,205 | 3.7%  | 0.073  | 0.014  |
| 2 |        |                                                       | 1,120 | 3.5%  |        |        |
| 1 | Z15.0  | Genetic susceptibility to malignant neoplasm          | 18    | 0.1%  | 0.194  | 0.010  |
| 2 |        |                                                       | 11    | 0.0%  |        |        |
| 1 | Z12    | Encounter for screening for malignant neoplasms       | 6,177 | 19.1% | <0.001 | 0.050  |
| 2 |        |                                                       | 5,550 | 17.2% |        |        |
| 1 | Z85    | Personal history of malignant neoplasm                | 1,106 | 3.4%  | 0.141  | 0.012  |
| 2 |        |                                                       | 1,039 | 3.2%  |        |        |
| 1 | Z98.84 | Bariatric surgery status                              | 520   | 1.6%  | 0.827  | 0.002  |
| 2 |        |                                                       | 527   | 1.6%  |        |        |
| 1 | F17    | Nicotine dependence                                   | 2,388 | 7.4%  | <0.001 | 0.037  |
| 2 |        |                                                       | 2,081 | 6.5%  |        |        |
| 1 | E66.0  | Obesity due to excess calories                        | 5,847 | 18.1% | 0.759  | 0.002  |
| 2 |        |                                                       | 5,817 | 18.0% |        |        |
| 1 | E66.2  | Morbid (severe) obesity with alveolar hypoventilation | 227   | 0.7%  | 0.361  | 0.007  |
| 2 |        |                                                       | 208   | 0.6%  |        |        |
| 1 | E66.3  | Overweight                                            | 529   | 1.6%  | 0.105  | 0.013  |
| 2 |        |                                                       | 478   | 1.5%  |        |        |
| 1 | E66.8  | Other obesity                                         | 190   | 0.6%  | 1      | <0.001 |
| 2 |        |                                                       | 190   | 0.6%  |        |        |
| 1 | E66.9  | Obesity, unspecified                                  | 8,097 | 25.1% | 0.181  | 0.011  |
| 2 |        |                                                       | 7,950 | 24.6% |        |        |
| 1 | Z72.0  | Tobacco use                                           | 584   | 1.8%  | 0.019  | 0.019  |
| 2 |        |                                                       | 507   | 1.6%  |        |        |
| 1 | K21    | Gastro-esophageal reflux disease                      | 6,661 | 20.6% | 0.004  | 0.023  |
| 2 |        |                                                       | 6,366 | 19.7% |        |        |
| 1 | K22.7  | Barrett's esophagus                                   | 243   | 0.8%  | 0.580  | 0.004  |
| 2 |        |                                                       | 231   | 0.7%  |        |        |
| 1 | K22.0  | Achalasia of cardia                                   | 30    | 0.1%  | 0.207  | 0.010  |
| 2 |        |                                                       | 21    | 0.1%  |        |        |

|   |        |                                                                                   |     |      |       |        |
|---|--------|-----------------------------------------------------------------------------------|-----|------|-------|--------|
| 1 | D69.4  | Evans syndrome                                                                    | 0   | 0%   | 0.002 | 0.025  |
| 2 | 1      |                                                                                   | 10  | 0.0% |       |        |
| 1 | D50.1  | Sideropenic dysphagia                                                             | 56  | 0.2% | 0.629 | 0.004  |
| 2 |        |                                                                                   | 51  | 0.2% |       |        |
| 1 | S27.81 | Injury of esophagus (thoracic part)                                               | 10  | 0.0% | 1     | <0.001 |
| 2 |        |                                                                                   | 10  | 0.0% |       |        |
| 1 | C34    | Malignant neoplasm of bronchus and lung                                           | 99  | 0.3% | 0.561 | 0.005  |
| 2 |        |                                                                                   | 91  | 0.3% |       |        |
| 1 | C06    | Malignant neoplasm of other and unspecified parts of mouth                        | 10  | 0.0% | 0.827 | 0.002  |
| 2 |        |                                                                                   | 11  | 0.0% |       |        |
| 1 | C32    | Malignant neoplasm of larynx                                                      | 13  | 0.0% | 0.532 | 0.005  |
| 2 |        |                                                                                   | 10  | 0.0% |       |        |
| 1 | B97.7  | Papillomavirus as the cause of diseases classified elsewhere                      | 56  | 0.2% | 0.049 | 0.016  |
| 2 |        |                                                                                   | 37  | 0.1% |       |        |
| 1 | R87.8  | High risk human papillomavirus (HPV) DNA test positive from female genital organs | 58  | 0.2% | 0.441 | 0.006  |
| 2 | 1      |                                                                                   | 50  | 0.2% |       |        |
| 1 | Z80.0  | Family history of malignant neoplasm of digestive organs                          | 408 | 1.3% | 0.058 | 0.015  |
| 2 |        |                                                                                   | 356 | 1.1% |       |        |
| 1 | D10    | Benign neoplasm of mouth and pharynx                                              | 38  | 0.1% | 0.005 | 0.022  |
| 2 |        |                                                                                   | 17  | 0.1% |       |        |
| 1 | D13.0  | Benign neoplasm of esophagus                                                      | 10  | 0.0% | 1     | <0.001 |
| 2 |        |                                                                                   | 10  | 0.0% |       |        |

### Medication

| Group  | Mean ± SD                                 | Patients | % of Group | P-Value | SMD   |
|--------|-------------------------------------------|----------|------------|---------|-------|
| 1 A10B |                                           | 5,424    | 16.8%      | 0.422   | 0.006 |
| 2 B    | Sulfonylureas                             | 5,348    | 16.6%      |         |       |
| 1 A10B |                                           | 124      | 0.4%       | 0.605   | 0.004 |
| 2 F    | Alpha glucosidase inhibitors              | 116      | 0.4%       |         |       |
| 1 A10B |                                           | 1,930    | 6.0%       | 0.689   | 0.003 |
| 2 G    | Thiazolidinediones                        | 1,906    | 5.9%       |         |       |
| 1 A10B |                                           | 3,465    | 10.7%      | 0.301   | 0.008 |
| 2 H    | Dipeptidyl peptidase 4 (DPP-4) inhibitors | 3,384    | 10.5%      |         |       |

|   |      |                                                    |        |       |       |       |
|---|------|----------------------------------------------------|--------|-------|-------|-------|
| 1 | A10B | Sodium-glucose co-transporter 2 (SGLT2) inhibitors | 1,747  | 5.4%  | 0.017 | 0.019 |
| 2 | K    |                                                    | 1,612  | 5.0%  |       |       |
| 1 | A10B | Other blood glucose lowering drugs, excl. insulins | 658    | 2.0%  | 0.118 | 0.012 |
| 2 | X    |                                                    | 603    | 1.9%  |       |       |
| 1 | A10A | INSULINS AND                                       | 14,037 | 43.5% | 0.446 | 0.006 |
| 2 |      | ANALOGUES                                          | 13,941 | 43.2% |       |       |

eTable 15. Characteristics of the GLP-1RA/no metformin group and metformin/no GLP-1RA group before and after matched for covariates related to breast cancer for the study populations of women (age 55 and older) with T2D and no history of any OAC

| <b>Group 1 (N = 10,497) and group 2 (N = 245,112) characteristics before propensity score matching</b> |        |                                                                                               |              |            |         |       |       |
|--------------------------------------------------------------------------------------------------------|--------|-----------------------------------------------------------------------------------------------|--------------|------------|---------|-------|-------|
| <b>Demographics</b>                                                                                    |        |                                                                                               |              |            |         |       |       |
| Group                                                                                                  |        | Mean ± SD                                                                                     | Patients     | % of Group | P-Value | SMD   |       |
| 1                                                                                                      | AI     | Age at Index                                                                                  | 65.1 +/- 6.8 | 10,497     | 100%    | <0.00 | 0.155 |
| 2                                                                                                      |        |                                                                                               | 66.2 +/- 7.2 | 245,112    | 100%    | 1     |       |
| 1                                                                                                      | 2106-3 | White                                                                                         |              | 7,228      | 68.9%   | <0.00 | 0.174 |
| 2                                                                                                      |        |                                                                                               |              | 148,499    | 60.6%   | 1     |       |
| 1                                                                                                      | 1002-5 | American Indian or Alaska Native                                                              |              | 25         | 0.2%    | 0.148 | 0.015 |
| 2                                                                                                      |        |                                                                                               |              | 782        | 0.3%    |       |       |
| 1                                                                                                      | UNK    | Unknown Race                                                                                  |              | 883        | 8.4%    | <0.00 | 0.098 |
| 2                                                                                                      |        |                                                                                               |              | 27,764     | 11.3%   | 1     |       |
| 1                                                                                                      | 2076-8 | Native Hawaiian or Other Pacific Islander                                                     |              | 43         | 0.4%    | 0.015 | 0.026 |
| 2                                                                                                      |        |                                                                                               |              | 1,458      | 0.6%    |       |       |
| 1                                                                                                      | UN     | Unknown Ethnicity                                                                             |              | 2,019      | 19.2%   | <0.00 | 0.179 |
| 2                                                                                                      |        |                                                                                               |              | 65,536     | 26.7%   | 1     |       |
| 1                                                                                                      | 2186-5 | Not Hispanic or Latino                                                                        |              | 7,582      | 72.2%   | <0.00 | 0.188 |
| 2                                                                                                      |        |                                                                                               |              | 155,608    | 63.5%   | 1     |       |
| 1                                                                                                      | 2135-2 | Hispanic or Latino                                                                            |              | 896        | 8.5%    | <0.00 | 0.043 |
| 2                                                                                                      |        |                                                                                               |              | 23,968     | 9.8%    | 1     |       |
| 1                                                                                                      | 2054-5 | Black or African American                                                                     |              | 1,881      | 17.9%   | 0.055 | 0.019 |
| 2                                                                                                      |        |                                                                                               |              | 45,751     | 18.7%   |       |       |
| 1                                                                                                      | 2028-9 | Asian                                                                                         |              | 178        | 1.7%    | <0.00 | 0.170 |
| 2                                                                                                      |        |                                                                                               |              | 11,425     | 4.7%    | 1     |       |
| <b>Diagnosis</b>                                                                                       |        |                                                                                               |              |            |         |       |       |
| Group                                                                                                  |        | Mean ± SD                                                                                     | Patients     | % of Group | P-Value | SMD   |       |
| 1                                                                                                      | Z55-   | Persons with potential health hazards related to socioeconomic and psychosocial circumstances | 135          | 1.3%       | 0.001   | 0.032 |       |
| 2                                                                                                      | Z65    |                                                                                               | 2,329        | 1.0%       |         |       |       |
| 1                                                                                                      | E66    | Overweight and obesity                                                                        | 3,810        | 36.3%      | <0.00   | 0.442 |       |
| 2                                                                                                      |        |                                                                                               | 42,178       | 17.2%      | 1       |       |       |

|   |        |                                                       |        |       |       |       |
|---|--------|-------------------------------------------------------|--------|-------|-------|-------|
| 1 | Z68.3  | Body mass index [BMI] 30-39, adult                    | 859    | 8.2%  | <0.00 | 0.212 |
| 2 |        |                                                       | 8,046  | 3.3%  | 1     |       |
| 1 | Z68.4  | Body mass index [BMI] 40 or greater, adult            | 948    | 9.0%  | <0.00 | 0.281 |
| 2 |        |                                                       | 6,215  | 2.5%  | 1     |       |
| 1 | Z68.25 | Body mass index [BMI] 25.0-25.9, adult                | 30     | 0.3%  | 0.017 | 0.021 |
| 2 |        |                                                       | 448    | 0.2%  |       |       |
| 1 | Z68.26 | Body mass index [BMI] 26.0-26.9, adult                | 44     | 0.4%  | <0.00 | 0.043 |
| 2 |        |                                                       | 450    | 0.2%  | 1     |       |
| 1 | Z68.27 | Body mass index [BMI] 27.0-27.9, adult                | 42     | 0.4%  | 0.001 | 0.030 |
| 2 |        |                                                       | 567    | 0.2%  |       |       |
| 1 | Z68.28 | Body mass index [BMI] 28.0-28.9, adult                | 51     | 0.5%  | <0.00 | 0.039 |
| 2 |        |                                                       | 611    | 0.2%  | 1     |       |
| 1 | Z68.29 | Body mass index [BMI] 29.0-29.9, adult                | 51     | 0.5%  | 0.001 | 0.029 |
| 2 |        |                                                       | 743    | 0.3%  |       |       |
| 1 | F10    | Alcohol related disorders                             | 67     | 0.6%  | 0.009 | 0.028 |
| 2 |        |                                                       | 2,158  | 0.9%  |       |       |
| 1 | Z80    | Family history of primary malignant neoplasm          | 527    | 5.0%  | <0.00 | 0.123 |
| 2 |        |                                                       | 6,537  | 2.7%  | 1     |       |
| 1 | Z15.0  | Genetic susceptibility to malignant neoplasm          | 10     | 0.1%  | <0.00 | 0.031 |
| 2 |        |                                                       | 52     | 0.0%  | 1     |       |
| 1 | Z12    | Encounter for screening for malignant neoplasms       | 2,745  | 26.2% | <0.00 | 0.152 |
| 2 |        |                                                       | 48,467 | 19.8% | 1     |       |
| 1 | Z85    | Personal history of malignant neoplasm                | 369    | 3.5%  | <0.00 | 0.041 |
| 2 |        |                                                       | 6,840  | 2.8%  | 1     |       |
| 1 | Z98.84 | Bariatric surgery status                              | 212    | 2.0%  | <0.00 | 0.138 |
| 2 |        |                                                       | 1,194  | 0.5%  | 1     |       |
| 1 | E66.0  | Obesity due to excess calories                        | 1,970  | 18.8% | <0.00 | 0.380 |
| 2 |        |                                                       | 15,667 | 6.4%  | 1     |       |
| 1 | E66.2  | Morbid (severe) obesity with alveolar hypoventilation | 85     | 0.8%  | <0.00 | 0.075 |
| 2 |        |                                                       | 642    | 0.3%  | 1     |       |
| 1 | E66.3  | Overweight                                            | 169    | 1.6%  | <0.00 | 0.070 |
| 2 |        |                                                       | 2,054  | 0.8%  | 1     |       |

|   |        |                                                                    |        |       |       |       |
|---|--------|--------------------------------------------------------------------|--------|-------|-------|-------|
| 1 | E66.8  | Other obesity                                                      | 61     | 0.6%  | <0.00 | 0.077 |
| 2 |        |                                                                    | 308    | 0.1%  | 1     |       |
| 1 | E66.9  | Obesity, unspecified                                               | 2,717  | 25.9% | <0.00 | 0.330 |
| 2 |        |                                                                    | 31,871 | 13.0% | 1     |       |
| 1 | O92.7  | Other and unspecified disorders of lactation                       | 0      | 0%    | 0.513 | 0.009 |
| 2 |        |                                                                    | 10     | 0.0%  |       |       |
| 1 | Z79.89 | Hormone replacement therapy                                        | 62     | 0.6%  | 0.014 | 0.023 |
| 2 | 0      |                                                                    | 1,053  | 0.4%  |       |       |
| 1 | Z92.23 | Personal history of estrogen therapy                               | 10     | 0.1%  | 0.013 | 0.020 |
| 2 |        |                                                                    | 105    | 0.0%  |       |       |
| 1 | Z98.82 | Breast implant status                                              | 10     | 0.1%  | <0.00 | 0.027 |
| 2 |        |                                                                    | 69     | 0.0%  | 1     |       |
| 1 | Z80.3  | Family history of malignant neoplasm of breast                     | 253    | 2.4%  | <0.00 | 0.085 |
| 2 |        |                                                                    | 3,111  | 1.3%  | 1     |       |
| 1 | R92    | Abnormal and inconclusive findings on diagnostic imaging of breast | 663    | 6.3%  | <0.00 | 0.041 |
| 2 |        |                                                                    | 13,119 | 5.4%  | 1     |       |
| 1 | D24    | Benign neoplasm of breast                                          | 57     | 0.5%  | 0.875 | 0.002 |
| 2 |        |                                                                    | 1,303  | 0.5%  |       |       |
| 1 | N60    | Benign mammary dysplasia                                           | 228    | 2.2%  | 0.253 | 0.011 |
| 2 |        |                                                                    | 4,931  | 2.0%  |       |       |
| 1 | N62    | Hypertrophy of breast                                              | 30     | 0.3%  | 0.286 | 0.010 |
| 2 |        |                                                                    | 574    | 0.2%  |       |       |
| 1 | N63    | Unspecified lump in breast                                         | 351    | 3.3%  | 0.571 | 0.006 |
| 2 |        |                                                                    | 7,951  | 3.2%  |       |       |
| 1 | N64    | Other disorders of breast                                          | 425    | 4.0%  | <0.00 | 0.050 |
| 2 |        |                                                                    | 7,633  | 3.1%  | 1     |       |
| 1 | N61    | Inflammatory disorders of breast                                   | 43     | 0.4%  | 0.030 | 0.020 |
| 2 |        |                                                                    | 716    | 0.3%  |       |       |
| 1 | D05    | Carcinoma in situ of breast                                        | 14     | 0.1%  | 0.541 | 0.006 |
| 2 |        |                                                                    | 386    | 0.2%  |       |       |

### Procedure

| Group | Mean ± SD | Patients | % of Group | P-Value | SMD   |
|-------|-----------|----------|------------|---------|-------|
| 1     |           | 10       | 0.1%       | <0.00   | 0.041 |
| 2     |           | 10       | 0.0%       | 1       |       |

|   |       |                                              |     |      |            |       |
|---|-------|----------------------------------------------|-----|------|------------|-------|
| 1 | 58300 | Insertion of<br>intrauterine device<br>(IUD) | 10  | 0.1% | <0.00<br>1 | 0.029 |
| 2 |       |                                              | 61  | 0.0% |            |       |
| 1 | 1001  | Radiation                                    | 28  | 0.3% | 0.092      | 0.018 |
| 2 |       |                                              | 902 | 0.4% |            |       |

### Medication

| Group |           |                                                           | Mean ± SD | Patients | % of<br>Group | P-<br>Value | SMD   |
|-------|-----------|-----------------------------------------------------------|-----------|----------|---------------|-------------|-------|
| 1     | A10A      | INSULINS AND<br>ANALOGUES                                 |           | 4,577    | 43.6%         | <0.00<br>1  | 0.599 |
| 2     |           |                                                           | 42,173    | 17.2%    |               |             |       |
| 1     | A10B<br>B | Sulfonylureas                                             |           | 1,853    | 17.7%         | <0.00<br>1  | 0.294 |
| 2     |           |                                                           | 19,472    | 7.9%     |               |             |       |
| 1     | A10B<br>F | Alpha glucosidase<br>inhibitors                           |           | 35       | 0.3%          | <0.00<br>1  | 0.047 |
| 2     |           |                                                           | 272       | 0.1%     |               |             |       |
| 1     | A10B<br>G | Thiazolidinediones                                        |           | 643      | 6.1%          | <0.00<br>1  | 0.188 |
| 2     |           |                                                           | 5,777     | 2.4%     |               |             |       |
| 1     | A10B<br>H | Dipeptidyl peptidase<br>4 (DPP-4) inhibitors              |           | 1,273    | 12.1%         | <0.00<br>1  | 0.388 |
| 2     |           |                                                           | 5,583     | 2.3%     |               |             |       |
| 1     | A10B<br>K | Sodium-glucose co-<br>transporter 2<br>(SGLT2) inhibitors |           | 569      | 5.4%          | <0.00<br>1  | 0.305 |
| 2     |           |                                                           | 907       | 0.4%     |               |             |       |
| 1     | A10B<br>X | Other blood glucose<br>lowering drugs, excl.<br>insulins  |           | 229      | 2.2%          | <0.00<br>1  | 0.152 |
| 2     |           |                                                           | 1,121     | 0.5%     |               |             |       |
| 1     | HS200     | CONTRACEPTIVE<br>S,SYSTEMIC                               |           | 189      | 1.8%          | <0.00<br>1  | 0.048 |
| 2     |           |                                                           | 2,971     | 1.2%     |               |             |       |

### Group 1 (N = 10,419) and group 2 (N = 10,419) characteristics after propensity score matching

#### Demographics

| Group |        |                                     | Mean ± SD    | Patients | % of<br>Group | P-<br>Value | SMD   |
|-------|--------|-------------------------------------|--------------|----------|---------------|-------------|-------|
| 1     | AI     | Age at Index                        | 65.2 +/- 6.8 | 10,419   | 100%          | 0.069       | 0.025 |
| 2     |        |                                     | 65.0 +/- 6.8 | 10,419   | 100%          |             |       |
| 1     | 2106-3 | White                               |              | 7,159    | 68.7%         | 0.012       | 0.035 |
| 2     |        |                                     | 7,326        | 70.3%    |               |             |       |
| 1     | 1002-5 | American Indian or<br>Alaska Native |              | 25       | 0.2%          | 0.586       | 0.008 |
| 2     |        |                                     | 29           | 0.3%     |               |             |       |
| 1     | UNK    | Unknown Race                        |              | 881      | 8.5%          | 0.157       | 0.020 |
| 2     |        |                                     | 825          | 7.9%     |               |             |       |

|   |        |                                           |       |       |       |       |
|---|--------|-------------------------------------------|-------|-------|-------|-------|
| 1 | 2076-8 | Native Hawaiian or Other Pacific Islander | 43    | 0.4%  | 0.430 | 0.011 |
| 2 |        |                                           | 36    | 0.3%  |       |       |
| 1 | UN     | Unknown Ethnicity                         | 2,016 | 19.3% | 0.032 | 0.030 |
| 2 |        |                                           | 1,895 | 18.2% |       |       |
| 1 | 2186-5 | Not Hispanic or Latino                    | 7,515 | 72.1% | 0.005 | 0.039 |
| 2 |        |                                           | 7,696 | 73.9% |       |       |
| 1 | 2135-2 | Hispanic or Latino                        | 888   | 8.5%  | 0.131 | 0.021 |
| 2 |        |                                           | 828   | 7.9%  |       |       |
| 1 | 2054-5 | Black or African American                 | 1,875 | 18.0% | 0.197 | 0.018 |
| 2 |        |                                           | 1,804 | 17.3% |       |       |
| 1 | 2028-9 | Asian                                     | 178   | 1.7%  | 0.247 | 0.016 |
| 2 |        |                                           | 157   | 1.5%  |       |       |

### Diagnosis

| Group |        | Mean ± SD                                                                                     | Patients | % of Group | P-Value | SMD   |
|-------|--------|-----------------------------------------------------------------------------------------------|----------|------------|---------|-------|
| 1     | Z55-   | Persons with potential health hazards related to socioeconomic and psychosocial circumstances | 132      | 1.3%       | 0.755   | 0.004 |
| 2     | Z65    |                                                                                               | 127      | 1.2%       |         |       |
| 1     | E66    | Overweight and obesity                                                                        | 3,757    | 36.1%      | 0.574   | 0.008 |
| 2     |        |                                                                                               | 3,796    | 36.4%      |         |       |
| 1     | Z68.3  | Body mass index [BMI] 30-39, adult                                                            | 840      | 8.1%       | 0.919   | 0.001 |
| 2     |        |                                                                                               | 844      | 8.1%       |         |       |
| 1     | Z68.4  | Body mass index [BMI] 40 or greater, adult                                                    | 921      | 8.8%       | 0.246   | 0.016 |
| 2     |        |                                                                                               | 874      | 8.4%       |         |       |
| 1     | Z68.25 | Body mass index [BMI] 25.0-25.9, adult                                                        | 30       | 0.3%       | 0.336   | 0.013 |
| 2     |        |                                                                                               | 23       | 0.2%       |         |       |
| 1     | Z68.26 | Body mass index [BMI] 26.0-26.9, adult                                                        | 42       | 0.4%       | 0.912   | 0.002 |
| 2     |        |                                                                                               | 41       | 0.4%       |         |       |
| 1     | Z68.27 | Body mass index [BMI] 27.0-27.9, adult                                                        | 40       | 0.4%       | 0.662   | 0.006 |
| 2     |        |                                                                                               | 44       | 0.4%       |         |       |
| 1     | Z68.28 | Body mass index [BMI] 28.0-28.9, adult                                                        | 50       | 0.5%       | 0.760   | 0.004 |
| 2     |        |                                                                                               | 47       | 0.5%       |         |       |



|   |        |                                                       |       |       |        |        |
|---|--------|-------------------------------------------------------|-------|-------|--------|--------|
| 1 | Z68.29 | Body mass index [BMI] 29.0-29.9, adult                | 51    | 0.5%  | 0.350  | 0.013  |
| 2 |        |                                                       | 42    | 0.4%  |        |        |
| 1 | F10    | Alcohol related disorders                             | 65    | 0.6%  | 0.044  | 0.028  |
| 2 |        |                                                       | 44    | 0.4%  |        |        |
| 1 | Z80    | Family history of primary malignant neoplasm          | 512   | 4.9%  | 0.006  | 0.038  |
| 2 |        |                                                       | 429   | 4.1%  |        |        |
| 1 | Z15.0  | Genetic susceptibility to malignant neoplasm          | 10    | 0.1%  | 1      | <0.001 |
| 2 |        |                                                       | 10    | 0.1%  |        |        |
| 1 | Z12    | Encounter for screening for malignant neoplasms       | 2,695 | 25.9% | <0.001 | 0.051  |
| 2 |        |                                                       | 2,467 | 23.7% | 1      |        |
| 1 | Z85    | Personal history of malignant neoplasm                | 365   | 3.5%  | 0.121  | 0.021  |
| 2 |        |                                                       | 325   | 3.1%  |        |        |
| 1 | Z98.84 | Bariatric surgery status                              | 200   | 1.9%  | 0.920  | 0.001  |
| 2 |        |                                                       | 202   | 1.9%  |        |        |
| 1 | E66.0  | Obesity due to excess calories                        | 1,930 | 18.5% | 0.972  | <0.001 |
| 2 |        |                                                       | 1,928 | 18.5% |        |        |
| 1 | E66.2  | Morbid (severe) obesity with alveolar hypoventilation | 81    | 0.8%  | 0.874  | 0.002  |
| 2 |        |                                                       | 79    | 0.8%  |        |        |
| 1 | E66.3  | Overweight                                            | 165   | 1.6%  | 0.737  | 0.005  |
| 2 |        |                                                       | 159   | 1.5%  |        |        |
| 1 | E66.8  | Other obesity                                         | 58    | 0.6%  | 0.854  | 0.003  |
| 2 |        |                                                       | 60    | 0.6%  |        |        |
| 1 | E66.9  | Obesity, unspecified                                  | 2,678 | 25.7% | 0.716  | 0.005  |
| 2 |        |                                                       | 2,701 | 25.9% |        |        |
| 1 | O92.7  | Other and unspecified disorders of lactation          | 0     | 0%    | --     | --     |
| 2 |        |                                                       | 0     | 0%    |        |        |
| 1 | Z79.89 | Hormone replacement therapy                           | 59    | 0.6%  | 0.779  | 0.004  |
| 2 | 0      |                                                       | 56    | 0.5%  |        |        |
| 1 | Z92.23 | Personal history of estrogen therapy                  | 10    | 0.1%  | 1      | <0.001 |
| 2 |        |                                                       | 10    | 0.1%  |        |        |
| 1 | Z98.82 | Breast implant status                                 | 10    | 0.1%  | 1      | <0.001 |
| 2 |        |                                                       | 10    | 0.1%  |        |        |
| 1 | Z80.3  | Family history of malignant neoplasm of breast        | 246   | 2.4%  | 0.057  | 0.026  |
| 2 |        |                                                       | 206   | 2.0%  |        |        |

|   |     |                                                                    |     |      |        |       |
|---|-----|--------------------------------------------------------------------|-----|------|--------|-------|
| 1 | R92 | Abnormal and inconclusive findings on diagnostic imaging of breast | 653 | 6.3% | <0.001 | 0.051 |
| 2 |     |                                                                    | 530 | 5.1% |        |       |
| 1 | D24 | Benign neoplasm of breast                                          | 57  | 0.5% | 0.379  | 0.012 |
| 2 |     |                                                                    | 48  | 0.5% |        |       |
| 1 | N60 | Benign mammary dysplasia                                           | 225 | 2.2% | 0.006  | 0.038 |
| 2 |     |                                                                    | 171 | 1.6% |        |       |
| 1 | N62 | Hypertrophy of breast                                              | 29  | 0.3% | 0.685  | 0.006 |
| 2 |     |                                                                    | 26  | 0.2% |        |       |
| 1 | N63 | Unspecified lump in breast                                         | 344 | 3.3% | 0.001  | 0.048 |
| 2 |     |                                                                    | 260 | 2.5% |        |       |
| 1 | N64 | Other disorders of breast                                          | 414 | 4.0% | 0.018  | 0.033 |
| 2 |     |                                                                    | 350 | 3.4% |        |       |
| 1 | N61 | Inflammatory disorders of breast                                   | 41  | 0.4% | 0.238  | 0.016 |
| 2 |     |                                                                    | 31  | 0.3% |        |       |
| 1 | D05 | Carcinoma in situ of breast                                        | 13  | 0.1% | 0.531  | 0.009 |
| 2 |     |                                                                    | 10  | 0.1% |        |       |

#### Procedure

| Group |       | Mean ± SD                              | Patients | % of Group | P-Value | SMD    |
|-------|-------|----------------------------------------|----------|------------|---------|--------|
| 1     | C1789 | Prosthesis, breast (implantable)       | 10       | 0.1%       | 1       | <0.001 |
| 2     |       |                                        | 10       | 0.1%       |         |        |
| 1     | 58300 | Insertion of intrauterine device (IUD) | 10       | 0.1%       | 1       | <0.001 |
| 2     |       |                                        | 10       | 0.1%       |         |        |
| 1     | 1001  | Radiation                              | 28       | 0.3%       | 0.680   | 0.006  |
| 2     |       |                                        | 25       | 0.2%       |         |        |

#### Medication

| Group |        | Mean ± SD                    | Patients | % of Group | P-Value | SMD   |
|-------|--------|------------------------------|----------|------------|---------|-------|
| 1     | A10A   | INSULINS AND ANALOGUES       | 4,506    | 43.2%      | 0.502   | 0.009 |
| 2     |        |                              | 4,458    | 42.8%      |         |       |
| 1     | A10B B | Sulfonylureas                | 1,814    | 17.4%      | 0.770   | 0.004 |
| 2     |        |                              | 1,830    | 17.6%      |         |       |
| 1     | A10B F | Alpha glucosidase inhibitors | 35       | 0.3%       | 0.714   | 0.005 |
| 2     |        |                              | 32       | 0.3%       |         |       |
| 1     | A10B G | Thiazolidinediones           | 624      | 6.0%       | 0.274   | 0.015 |
| 2     |        |                              | 662      | 6.4%       |         |       |

|   |       |                                     |       |       |       |       |
|---|-------|-------------------------------------|-------|-------|-------|-------|
| 1 | A10B  | Dipeptidyl peptidase                | 1,220 | 11.7% |       |       |
| 2 | H     | 4 (DPP-4) inhibitors                | 1,222 | 11.7% | 0.966 | 0.001 |
| 1 | A10B  | Sodium-glucose co-                  | 496   | 4.8%  |       |       |
| 2 | K     | transporter 2<br>(SGLT2) inhibitors | 428   | 4.1%  | 0.022 | 0.032 |
| 1 | A10B  | Other blood glucose                 | 222   | 2.1%  |       |       |
| 2 | X     | lowering drugs, excl.<br>insulins   | 223   | 2.1%  | 0.962 | 0.001 |
| 1 | HS200 | CONTRACEPTIVE                       | 187   | 1.8%  |       |       |
| 2 |       | S,SYSTEMIC                          | 169   | 1.6%  | 0.336 | 0.013 |

eTable 16. Characteristics of the GLP-1RA/no metformin group and metformin/no GLP-1RA group before and after matched for covariates related to colorectal cancer for the study populations of patients with T2D and no history of any OAC

| <b>Group 1 (N = 32,365) and group 2 (N = 856,160) characteristics before propensity score matching</b> |        |                                                                    |               |            |         |       |       |
|--------------------------------------------------------------------------------------------------------|--------|--------------------------------------------------------------------|---------------|------------|---------|-------|-------|
| <b>Demographics</b>                                                                                    |        |                                                                    |               |            |         |       |       |
| Group                                                                                                  |        | Mean ± SD                                                          | Patients      | % of Group | P-Value | SMD   |       |
| 1                                                                                                      | AI     | Age at Index                                                       | 59.0 +/- 12.4 | 32,365     | 100%    | <0.00 | 0.080 |
| 2                                                                                                      |        |                                                                    | 60.1 +/- 14.0 | 856,160    | 100%    | 1     |       |
| 1                                                                                                      | 2106-3 | White                                                              |               | 21,231     | 65.6%   | <0.00 | 0.111 |
| 2                                                                                                      |        |                                                                    |               | 515,868    | 60.3%   | 1     |       |
| 1                                                                                                      | 1002-5 | American Indian or Alaska Native                                   |               | 98         | 0.3%    | 0.092 | 0.010 |
| 2                                                                                                      |        |                                                                    |               | 3,080      | 0.4%    |       |       |
| 1                                                                                                      | UNK    | Unknown Race                                                       |               | 4,272      | 13.2%   | <0.00 | 0.021 |
| 2                                                                                                      |        |                                                                    |               | 119,036    | 13.9%   | 1     |       |
| 1                                                                                                      | F      | Female                                                             |               | 17,278     | 53.4%   | <0.00 | 0.134 |
| 2                                                                                                      |        |                                                                    |               | 399,923    | 46.7%   | 1     |       |
| 1                                                                                                      | 2076-8 | Native Hawaiian or Other Pacific Islander                          |               | 172        | 0.5%    | 0.001 | 0.020 |
| 2                                                                                                      |        |                                                                    |               | 5,884      | 0.7%    |       |       |
| 1                                                                                                      | UN     | Unknown Gender                                                     |               | 1,670      | 5.2%    | <0.00 | 0.152 |
| 2                                                                                                      |        |                                                                    |               | 19,592     | 2.3%    | 1     |       |
| 1                                                                                                      | 2186-5 | Not Hispanic or Latino                                             |               | 22,299     | 68.9%   | <0.00 | 0.151 |
| 2                                                                                                      |        |                                                                    |               | 528,686    | 61.8%   | 1     |       |
| 1                                                                                                      | 2135-2 | Hispanic or Latino                                                 |               | 2,660      | 8.2%    | <0.00 | 0.084 |
| 2                                                                                                      |        |                                                                    |               | 91,303     | 10.7%   | 1     |       |
| 1                                                                                                      | 2054-5 | Black or African American                                          |               | 5,107      | 15.8%   | <0.00 | 0.021 |
| 2                                                                                                      |        |                                                                    |               | 141,606    | 16.5%   | 1     |       |
| 1                                                                                                      | M      | Male                                                               |               | 13,417     | 41.5%   | <0.00 | 0.192 |
| 2                                                                                                      |        |                                                                    |               | 436,645    | 51.0%   | 1     |       |
| 1                                                                                                      | 2028-9 | Asian                                                              |               | 681        | 2.1%    | <0.00 | 0.118 |
| 2                                                                                                      |        |                                                                    |               | 35,540     | 4.2%    | 1     |       |
| <b>Diagnosis</b>                                                                                       |        |                                                                    |               |            |         |       |       |
| Group                                                                                                  |        | Mean ± SD                                                          | Patients      | % of Group | P-Value | SMD   |       |
| 1                                                                                                      | Z55-   | Persons with potential health hazards related to socioeconomic and | 422           | 1.3%       | 0.107   | 0.009 |       |
| 2                                                                                                      | Z65    |                                                                    | 10,310        | 1.2%       |         |       |       |

|   |        | psychosocial<br>circumstances                         |         |       |       |       |
|---|--------|-------------------------------------------------------|---------|-------|-------|-------|
| 1 | E66    | Overweight and<br>obesity                             | 11,418  | 35.3% | <0.00 | 0.411 |
| 2 |        |                                                       | 149,974 | 17.5% | 1     |       |
| 1 | Z68.3  | Body mass index<br>[BMI] 30-39, adult                 | 3,285   | 10.1% | <0.00 | 0.249 |
| 2 |        |                                                       | 32,977  | 3.9%  | 1     |       |
| 1 | Z68.4  | Body mass index<br>[BMI] 40 or greater,<br>adult      | 3,012   | 9.3%  | <0.00 | 0.278 |
| 2 |        |                                                       | 23,535  | 2.7%  | 1     |       |
| 1 | Z68.25 | Body mass index<br>[BMI] 25.0-25.9,<br>adult          | 119     | 0.4%  | 0.001 | 0.018 |
| 2 |        |                                                       | 2,293   | 0.3%  |       |       |
| 1 | Z68.26 | Body mass index<br>[BMI] 26.0-26.9,<br>adult          | 150     | 0.5%  | <0.00 | 0.029 |
| 2 |        |                                                       | 2,433   | 0.3%  | 1     |       |
| 1 | Z68.27 | Body mass index<br>[BMI] 27.0-27.9,<br>adult          | 209     | 0.6%  | <0.00 | 0.043 |
| 2 |        |                                                       | 2,942   | 0.3%  | 1     |       |
| 1 | Z68.28 | Body mass index<br>[BMI] 28.0-28.9,<br>adult          | 264     | 0.8%  | <0.00 | 0.055 |
| 2 |        |                                                       | 3,317   | 0.4%  | 1     |       |
| 1 | Z68.29 | Body mass index<br>[BMI] 29.0-29.9,<br>adult          | 299     | 0.9%  | <0.00 | 0.059 |
| 2 |        |                                                       | 3,753   | 0.4%  | 1     |       |
| 1 | F10    | Alcohol related<br>disorders                          | 460     | 1.4%  | <0.00 | 0.076 |
| 2 |        |                                                       | 21,150  | 2.5%  | 1     |       |
| 1 | Z80    | Family history of<br>primary malignant<br>neoplasm    | 1,222   | 3.8%  | <0.00 | 0.114 |
| 2 |        |                                                       | 16,133  | 1.9%  | 1     |       |
| 1 | Z15.0  | Genetic<br>susceptibility to<br>malignant neoplasm    | 18      | 0.1%  | <0.00 | 0.021 |
| 2 |        |                                                       | 140     | 0.0%  | 1     |       |
| 1 | Z12    | Encounter for<br>screening for<br>malignant neoplasms | 6,223   | 19.2% | <0.00 | 0.157 |
| 2 |        |                                                       | 114,996 | 13.4% | 1     |       |
| 1 | Z85    | Personal history of<br>malignant neoplasm             | 1,111   | 3.4%  | <0.00 | 0.042 |
| 2 |        |                                                       | 23,231  | 2.7%  | 1     |       |
| 1 | Z98.84 | Bariatric surgery<br>status                           | 534     | 1.6%  | <0.00 | 0.131 |
| 2 |        |                                                       | 2,989   | 0.3%  | 1     |       |
| 1 | F17    | Nicotine dependence                                   | 2,399   | 7.4%  | <0.00 | 0.059 |
| 2 |        |                                                       | 77,335  | 9.0%  | 1     |       |

|                   |       |              |                                                          |          |            |         |       |
|-------------------|-------|--------------|----------------------------------------------------------|----------|------------|---------|-------|
| 1                 | 2     | E66.0        | Obesity due to excess calories                           | 5,910    | 18.3%      | <0.00   | 0.361 |
|                   |       |              |                                                          | 56,178   | 6.6%       | 1       |       |
| 1                 | 2     | E66.2        | Morbid (severe) obesity with alveolar hypoventilation    | 230      | 0.7%       | <0.00   | 0.069 |
|                   |       |              |                                                          | 2,051    | 0.2%       | 1       |       |
| 1                 | 2     | E66.3        | Overweight                                               | 535      | 1.7%       | <0.00   | 0.066 |
|                   |       |              |                                                          | 7,794    | 0.9%       | 1       |       |
| 1                 | 2     | E66.8        | Other obesity                                            | 193      | 0.6%       | <0.00   | 0.078 |
|                   |       |              |                                                          | 1,084    | 0.1%       | 1       |       |
| 1                 | 2     | E66.9        | Obesity, unspecified                                     | 8,150    | 25.2%      | <0.00   | 0.307 |
|                   |       |              |                                                          | 113,380  | 13.2%      | 1       |       |
| 1                 | 2     | K50          | Crohn's disease [regional enteritis]                     | 149      | 0.5%       | <0.00   | 0.038 |
|                   |       |              |                                                          | 2,039    | 0.2%       | 1       |       |
| 1                 | 2     | K51          | Ulcerative colitis                                       | 126      | 0.4%       | <0.00   | 0.020 |
|                   |       |              |                                                          | 2,339    | 0.3%       | 1       |       |
| 1                 | 2     | K63.5        | Polyp of colon                                           | 1,321    | 4.1%       | <0.00   | 0.020 |
|                   |       |              |                                                          | 31,663   | 3.7%       | 1       |       |
| 1                 | 2     | Z72.0        | Tobacco use                                              | 588      | 1.8%       | <0.00   | 0.034 |
|                   |       |              |                                                          | 11,927   | 1.4%       | 1       |       |
| 1                 | 2     | Z83.71       | Family history of colonic polyps                         | 48       | 0.1%       | <0.00   | 0.023 |
|                   |       |              |                                                          | 606      | 0.1%       | 1       |       |
| 1                 | 2     | E84          | Cystic fibrosis                                          | 10       | 0.0%       | 0.326   | 0.006 |
|                   |       |              |                                                          | 362      | 0.0%       |         |       |
| 1                 | 2     | Q85.8        | Other phakomatoses, not elsewhere classified             | 10       | 0.0%       | 0.011   | 0.012 |
|                   |       |              |                                                          | 117      | 0.0%       |         |       |
| 1                 | 2     | Z80.0        | Family history of malignant neoplasm of digestive organs | 413      | 1.3%       | <0.00   | 0.055 |
|                   |       |              |                                                          | 6,255    | 0.7%       | 1       |       |
| 1                 | 2     | D12          | Benign neoplasm of colon, rectum, anus and anal canal    | 1,692    | 5.2%       | <0.00   | 0.047 |
|                   |       |              |                                                          | 36,157   | 4.2%       | 1       |       |
| <b>Procedure</b>  |       |              |                                                          |          |            |         |       |
| Group             |       |              | Mean ± SD                                                | Patients | % of Group | P-Value | SMD   |
| 1                 | 10222 | Colonoscopy, |                                                          | 1,885    | 5.8%       | <0.00   | 0.062 |
| 2                 | 31    | flexible     |                                                          | 38,210   | 4.5%       | 1       |       |
| <b>Medication</b> |       |              |                                                          |          |            |         |       |
| Group             |       |              | Mean ± SD                                                | Patients | % of Group | P-Value | SMD   |

|   |      |                                                    |         |       |       |       |
|---|------|----------------------------------------------------|---------|-------|-------|-------|
| 1 | A10A | INSULINS AND ANALOGUES                             | 14,131  | 43.7% | <0.00 | 0.560 |
| 2 |      |                                                    | 159,901 | 18.7% | 1     |       |
| 1 | A10B | Sulfonylureas                                      | 5,464   | 16.9% | <0.00 | 0.269 |
| 2 | B    |                                                    | 69,045  | 8.1%  | 1     |       |
| 1 | A10B | Alpha glucosidase inhibitors                       | 124     | 0.4%  | <0.00 | 0.057 |
| 2 | F    |                                                    | 876     | 0.1%  | 1     |       |
| 1 | A10B | Thiazolidinediones                                 | 1,960   | 6.1%  | <0.00 | 0.183 |
| 2 | G    |                                                    | 20,400  | 2.4%  | 1     |       |
| 1 | A10B | Dipeptidyl peptidase 4 (DPP-4) inhibitors          | 3,547   | 11.0% | <0.00 | 0.370 |
| 2 | H    |                                                    | 17,113  | 2.0%  | 1     |       |
| 1 | A10B | Sodium-glucose co-transporter 2 (SGLT2) inhibitors | 1,839   | 5.7%  | <0.00 | 0.312 |
| 2 | K    |                                                    | 3,371   | 0.4%  | 1     |       |
| 1 | A10B | Other blood glucose lowering drugs, excl. insulins | 672     | 2.1%  | <0.00 | 0.146 |
| 2 | X    |                                                    | 3,839   | 0.4%  | 1     |       |

**Group 1 (N = 32,275) and group 2 (N = 32,275) characteristics after propensity score matching**

**Demographics**

| Group |        | Mean ± SD                                 | Patients | % of Group | P-Value | SMD   |
|-------|--------|-------------------------------------------|----------|------------|---------|-------|
| 1     | AI     | Age at Index                              | 32,275   | 100%       | 0.287   | 0.008 |
| 2     |        |                                           | 32,275   | 100%       |         |       |
| 1     | 2106-3 | White                                     | 21,169   | 65.6%      | <0.00   | 0.033 |
| 2     |        |                                           | 21,665   | 67.1%      | 1       |       |
| 1     | 1002-5 | American Indian or Alaska Native          | 98       | 0.3%       | 0.887   | 0.001 |
| 2     |        |                                           | 100      | 0.3%       |         |       |
| 1     | UNK    | Unknown Race                              | 4,258    | 13.2%      | 0.157   | 0.011 |
| 2     |        |                                           | 4,137    | 12.8%      |         |       |
| 1     | F      | Female                                    | 17,215   | 53.3%      | 0.076   | 0.014 |
| 2     |        |                                           | 17,440   | 54.0%      |         |       |
| 1     | 2076-8 | Native Hawaiian or Other Pacific Islander | 172      | 0.5%       | 0.161   | 0.011 |
| 2     |        |                                           | 147      | 0.5%       |         |       |
| 1     | UN     | Unknown Gender                            | 1,658    | 5.1%       | 0.125   | 0.012 |
| 2     |        |                                           | 1,745    | 5.4%       |         |       |
| 1     | 2186-5 | Not Hispanic or Latino                    | 22,237   | 68.9%      | 0.001   | 0.026 |
| 2     |        |                                           | 22,623   | 70.1%      |         |       |
| 1     | 2135-2 | Hispanic or Latino                        | 2,652    | 8.2%       | 0.002   | 0.024 |
| 2     |        |                                           | 2,443    | 7.6%       |         |       |

| 1                | 2054-5 | Black or African American                                                                     | 5,093     | 15.8%    | 0.015      | 0.019   |        |
|------------------|--------|-----------------------------------------------------------------------------------------------|-----------|----------|------------|---------|--------|
| 2                |        |                                                                                               | 4,870     | 15.1%    |            |         |        |
| 1                | M      | Male                                                                                          | 13,402    | 41.5%    | 0.013      | 0.020   |        |
| 2                |        |                                                                                               | 13,090    | 40.6%    |            |         |        |
| 1                | 2028-9 | Asian                                                                                         | 681       | 2.1%     | 0.056      | 0.015   |        |
| 2                |        |                                                                                               | 613       | 1.9%     |            |         |        |
| <b>Diagnosis</b> |        |                                                                                               |           |          |            |         |        |
| Group            |        |                                                                                               | Mean ± SD | Patients | % of Group | P-Value | SMD    |
| 1                | Z55-   | Persons with potential health hazards related to socioeconomic and psychosocial circumstances |           | 419      | 1.3%       | 0.004   | 0.022  |
| 2                | Z65    |                                                                                               |           | 341      | 1.1%       |         |        |
| 1                | E66    | Overweight and obesity                                                                        |           | 11,353   | 35.2%      | 0.792   | 0.002  |
| 2                |        |                                                                                               |           | 11,321   | 35.1%      |         |        |
| 1                | Z68.3  | Body mass index [BMI] 30-39, adult                                                            |           | 3,252    | 10.1%      | 0.211   | 0.010  |
| 2                |        |                                                                                               |           | 3,157    | 9.8%       |         |        |
| 1                | Z68.4  | Body mass index [BMI] 40 or greater, adult                                                    |           | 2,976    | 9.2%       | 0.233   | 0.009  |
| 2                |        |                                                                                               |           | 2,889    | 9.0%       |         |        |
| 1                | Z68.25 | Body mass index [BMI] 25.0-25.9, adult                                                        |           | 119      | 0.4%       | 0.100   | 0.013  |
| 2                |        |                                                                                               |           | 95       | 0.3%       |         |        |
| 1                | Z68.26 | Body mass index [BMI] 26.0-26.9, adult                                                        |           | 150      | 0.5%       | 0.148   | 0.011  |
| 2                |        |                                                                                               |           | 126      | 0.4%       |         |        |
| 1                | Z68.27 | Body mass index [BMI] 27.0-27.9, adult                                                        |           | 209      | 0.6%       | 0.767   | 0.002  |
| 2                |        |                                                                                               |           | 203      | 0.6%       |         |        |
| 1                | Z68.28 | Body mass index [BMI] 28.0-28.9, adult                                                        |           | 264      | 0.8%       | 0.965   | <0.001 |
| 2                |        |                                                                                               |           | 265      | 0.8%       |         |        |
| 1                | Z68.29 | Body mass index [BMI] 29.0-29.9, adult                                                        |           | 299      | 0.9%       | 0.314   | 0.008  |
| 2                |        |                                                                                               |           | 275      | 0.9%       |         |        |
| 1                | F10    | Alcohol related disorders                                                                     |           | 458      | 1.4%       | <0.001  | 0.033  |
| 2                |        |                                                                                               |           | 339      | 1.1%       |         |        |
| 1                | Z80    | Family history of primary malignant neoplasm                                                  |           | 1,208    | 3.7%       | 0.080   | 0.014  |
| 2                |        |                                                                                               |           | 1,125    | 3.5%       |         |        |



|   |        |                                                          |       |       |        |        |
|---|--------|----------------------------------------------------------|-------|-------|--------|--------|
| 1 | Z15.0  | Genetic susceptibility to malignant neoplasm             | 18    | 0.1%  | 0.130  | 0.012  |
| 2 |        |                                                          | 10    | 0.0%  |        |        |
| 1 | Z12    | Encounter for screening for malignant neoplasms          | 6,177 | 19.1% | <0.001 | 0.051  |
| 2 |        |                                                          | 5,545 | 17.2% |        |        |
| 1 | Z85    | Personal history of malignant neoplasm                   | 1,108 | 3.4%  | 0.284  | 0.008  |
| 2 |        |                                                          | 1,059 | 3.3%  |        |        |
| 1 | Z98.84 | Bariatric surgery status                                 | 519   | 1.6%  | 0.614  | 0.004  |
| 2 |        |                                                          | 503   | 1.6%  |        |        |
| 1 | F17    | Nicotine dependence                                      | 2,390 | 7.4%  | <0.001 | 0.035  |
| 2 |        |                                                          | 2,101 | 6.5%  |        |        |
| 1 | E66.0  | Obesity due to excess calories                           | 5,854 | 18.1% | 0.967  | <0.001 |
| 2 |        |                                                          | 5,858 | 18.2% |        |        |
| 1 | E66.2  | Morbid (severe) obesity with alveolar hypoventilation    | 227   | 0.7%  | 0.887  | 0.001  |
| 2 |        |                                                          | 224   | 0.7%  |        |        |
| 1 | E66.3  | Overweight                                               | 530   | 1.6%  | 0.002  | 0.025  |
| 2 |        |                                                          | 434   | 1.3%  |        |        |
| 1 | E66.8  | Other obesity                                            | 191   | 0.6%  | 0.317  | 0.008  |
| 2 |        |                                                          | 172   | 0.5%  |        |        |
| 1 | E66.9  | Obesity, unspecified                                     | 8,109 | 25.1% | 0.287  | 0.008  |
| 2 |        |                                                          | 7,992 | 24.8% |        |        |
| 1 | K50    | Crohn's disease [regional enteritis]                     | 147   | 0.5%  | 0.336  | 0.008  |
| 2 |        |                                                          | 131   | 0.4%  |        |        |
| 1 | K51    | Ulcerative colitis                                       | 126   | 0.4%  | 0.128  | 0.012  |
| 2 |        |                                                          | 103   | 0.3%  |        |        |
| 1 | K63.5  | Polyp of colon                                           | 1,307 | 4.0%  | <0.001 | 0.041  |
| 2 |        |                                                          | 1,060 | 3.3%  |        |        |
| 1 | Z72.0  | Tobacco use                                              | 583   | 1.8%  | 0.028  | 0.017  |
| 2 |        |                                                          | 511   | 1.6%  |        |        |
| 1 | Z83.71 | Family history of colonic polyps                         | 46    | 0.1%  | 0.544  | 0.005  |
| 2 |        |                                                          | 52    | 0.2%  |        |        |
| 1 | E84    | Cystic fibrosis                                          | 10    | 0.0%  | 0.317  | 0.008  |
| 2 |        |                                                          | 15    | 0.0%  |        |        |
| 1 | Q85.8  | Other phakomatoses, not elsewhere classified             | 10    | 0.0%  | 1      | <0.001 |
| 2 |        |                                                          | 10    | 0.0%  |        |        |
| 1 | Z80.0  | Family history of malignant neoplasm of digestive organs | 408   | 1.3%  | 0.054  | 0.015  |
| 2 |        |                                                          | 355   | 1.1%  |        |        |

|                   |       |                                                       |           |          |            |         |        |
|-------------------|-------|-------------------------------------------------------|-----------|----------|------------|---------|--------|
| 1                 | D12   | Benign neoplasm of colon, rectum, anus and anal canal |           | 1,675    | 5.2%       | <0.001  | 0.048  |
| 2                 |       |                                                       |           | 1,345    | 4.2%       |         |        |
| <b>Procedure</b>  |       |                                                       |           |          |            |         |        |
| Group             |       |                                                       | Mean ± SD | Patients | % of Group | P-Value | SMD    |
| 1                 | 10222 | Colonoscopy, flexible                                 |           | 1,869    | 5.8%       | <0.001  | 0.047  |
| 2                 | 31    |                                                       |           | 1,530    | 4.7%       |         |        |
| <b>Medication</b> |       |                                                       |           |          |            |         |        |
| Group             |       |                                                       | Mean ± SD | Patients | % of Group | P-Value | SMD    |
| 1                 | A10A  | INSULINS AND ANALOGUES                                |           | 14,048   | 43.5%      | 0.116   | 0.012  |
| 2                 |       |                                                       |           | 13,850   | 42.9%      |         |        |
| 1                 | A10B  | Sulfonylureas                                         |           | 5,426    | 16.8%      | 0.186   | 0.010  |
| 2                 | B     |                                                       |           | 5,301    | 16.4%      |         |        |
| 1                 | A10B  | Alpha glucosidase inhibitors                          |           | 124      | 0.4%       | 1       | <0.001 |
| 2                 | F     |                                                       |           | 124      | 0.4%       |         |        |
| 1                 | A10B  | Thiazolidinediones                                    |           | 1,931    | 6.0%       | 0.817   | 0.002  |
| 2                 | G     |                                                       |           | 1,945    | 6.0%       |         |        |
| 1                 | A10B  | Dipeptidyl peptidase 4 (DPP-4) inhibitors             |           | 3,474    | 10.8%      | 0.261   | 0.009  |
| 2                 | H     |                                                       |           | 3,386    | 10.5%      |         |        |
| 1                 | A10B  | Sodium-glucose co-transporter 2 (SGLT2) inhibitors    |           | 1,756    | 5.4%       | 0.019   | 0.019  |
| 2                 | K     |                                                       |           | 1,623    | 5.0%       |         |        |
| 1                 | A10B  | Other blood glucose lowering drugs, excl. insulins    |           | 660      | 2.0%       | 0.846   | 0.002  |
| 2                 | X     |                                                       |           | 667      | 2.1%       |         |        |

eTable 17. Characteristics of the GLP-1RA/no metformin group and metformin/no GLP-1RA group before and after matched for covariates related to endometrial cancer for the study populations of women with T2D and no history of any OAC

| <b>Group 1 (N = 17,278) and group 2 (N = 399,923) characteristics before propensity score matching</b> |        |                                                                                               |               |            |         |       |       |
|--------------------------------------------------------------------------------------------------------|--------|-----------------------------------------------------------------------------------------------|---------------|------------|---------|-------|-------|
| <b>Demographics</b>                                                                                    |        |                                                                                               |               |            |         |       |       |
| Group                                                                                                  |        | Mean ± SD                                                                                     | Patients      | % of Group | P-Value | SMD   |       |
| 1                                                                                                      | AI     | Age at Index                                                                                  | 57.7 +/- 12.8 | 17,278     | 100%    | <0.00 | 0.160 |
| 2                                                                                                      |        |                                                                                               | 60.0 +/- 14.7 | 399,923    | 100%    | 1     |       |
| 1                                                                                                      | 2106-3 | White                                                                                         |               | 11,336     | 65.6%   | <0.00 | 0.158 |
| 2                                                                                                      |        |                                                                                               |               | 231,828    | 58.0%   | 1     |       |
| 1                                                                                                      | 1002-5 | American Indian or Alaska Native                                                              |               | 59         | 0.3%    | 0.334 | 0.008 |
| 2                                                                                                      |        |                                                                                               |               | 1,552      | 0.4%    |       |       |
| 1                                                                                                      | UNK    | Unknown Race                                                                                  |               | 1,563      | 9.0%    | <0.00 | 0.107 |
| 2                                                                                                      |        |                                                                                               |               | 49,384     | 12.3%   | 1     |       |
| 1                                                                                                      | 2076-8 | Native Hawaiian or Other Pacific Islander                                                     |               | 80         | 0.5%    | <0.00 | 0.033 |
| 2                                                                                                      |        |                                                                                               |               | 2,869      | 0.7%    | 1     |       |
| 1                                                                                                      | UN     | Unknown Ethnicity                                                                             |               | 3,145      | 18.2%   | <0.00 | 0.188 |
| 2                                                                                                      |        |                                                                                               |               | 103,904    | 26.0%   | 1     |       |
| 1                                                                                                      | 2186-5 | Not Hispanic or Latino                                                                        |               | 12,481     | 72.2%   | <0.00 | 0.219 |
| 2                                                                                                      |        |                                                                                               |               | 247,896    | 62.0%   | 1     |       |
| 1                                                                                                      | 2135-2 | Hispanic or Latino                                                                            |               | 1,652      | 9.6%    | <0.00 | 0.080 |
| 2                                                                                                      |        |                                                                                               |               | 48,123     | 12.0%   | 1     |       |
| 1                                                                                                      | 2054-5 | Black or African American                                                                     |               | 3,476      | 20.1%   | 0.723 | 0.003 |
| 2                                                                                                      |        |                                                                                               |               | 80,016     | 20.0%   |       |       |
| 1                                                                                                      | 2028-9 | Asian                                                                                         |               | 311        | 1.8%    | <0.00 | 0.149 |
| 2                                                                                                      |        |                                                                                               |               | 17,483     | 4.4%    | 1     |       |
| <b>Diagnosis</b>                                                                                       |        |                                                                                               |               |            |         |       |       |
| Group                                                                                                  |        | Mean ± SD                                                                                     | Patients      | % of Group | P-Value | SMD   |       |
| 1                                                                                                      | Z55-   | Persons with potential health hazards related to socioeconomic and psychosocial circumstances | 270           | 1.6%       | 0.003   | 0.022 |       |
| 2                                                                                                      | Z65    |                                                                                               | 5,204         | 1.3%       |         |       |       |
| 1                                                                                                      | E66    | Overweight and obesity                                                                        | 6,461         | 37.4%      | <0.00   | 0.399 |       |
| 2                                                                                                      |        |                                                                                               | 78,874        | 19.7%      | 1       |       |       |

|   |        |                                                             |        |       |       |       |
|---|--------|-------------------------------------------------------------|--------|-------|-------|-------|
| 1 | Z68.3  | Body mass index<br>[BMI] 30-39, adult                       | 1,360  | 7.9%  | <0.00 | 0.203 |
| 2 |        |                                                             | 13,007 | 3.3%  | 1     |       |
| 1 | Z68.4  | Body mass index<br>[BMI] 40 or greater,<br>adult            | 1,671  | 9.7%  | <0.00 | 0.264 |
| 2 |        |                                                             | 12,991 | 3.2%  | 1     |       |
| 1 | Z68.25 | Body mass index<br>[BMI] 25.0-25.9,<br>adult                | 39     | 0.2%  | 0.039 | 0.015 |
| 2 |        |                                                             | 643    | 0.2%  |       |       |
| 1 | Z68.26 | Body mass index<br>[BMI] 26.0-26.9,<br>adult                | 52     | 0.3%  | <0.00 | 0.031 |
| 2 |        |                                                             | 616    | 0.2%  | 1     |       |
| 1 | Z68.27 | Body mass index<br>[BMI] 27.0-27.9,<br>adult                | 59     | 0.3%  | <0.00 | 0.029 |
| 2 |        |                                                             | 760    | 0.2%  | 1     |       |
| 1 | Z68.28 | Body mass index<br>[BMI] 28.0-28.9,<br>adult                | 69     | 0.4%  | <0.00 | 0.033 |
| 2 |        |                                                             | 862    | 0.2%  | 1     |       |
| 1 | Z68.29 | Body mass index<br>[BMI] 29.0-29.9,<br>adult                | 76     | 0.4%  | <0.00 | 0.031 |
| 2 |        |                                                             | 1,029  | 0.3%  | 1     |       |
| 1 | Z80    | Family history of<br>primary malignant<br>neoplasm          | 821    | 4.8%  | <0.00 | 0.124 |
| 2 |        |                                                             | 9,798  | 2.4%  | 1     |       |
| 1 | Z15.0  | Genetic<br>susceptibility to<br>malignant neoplasm          | 15     | 0.1%  | <0.00 | 0.027 |
| 2 |        |                                                             | 91     | 0.0%  | 1     |       |
| 1 | Z12    | Encounter for<br>screening for<br>malignant neoplasms       | 4,113  | 23.8% | <0.00 | 0.149 |
| 2 |        |                                                             | 71,089 | 17.8% | 1     |       |
| 1 | Z85    | Personal history of<br>malignant neoplasm                   | 492    | 2.8%  | <0.00 | 0.032 |
| 2 |        |                                                             | 9,342  | 2.3%  | 1     |       |
| 1 | Z98.84 | Bariatric surgery<br>status                                 | 378    | 2.2%  | <0.00 | 0.145 |
| 2 |        |                                                             | 2,056  | 0.5%  | 1     |       |
| 1 | E66.0  | Obesity due to<br>excess calories                           | 3,456  | 20.0% | <0.00 | 0.354 |
| 2 |        |                                                             | 31,701 | 7.9%  | 1     |       |
| 1 | E66.2  | Morbid (severe)<br>obesity with alveolar<br>hypoventilation | 132    | 0.8%  | <0.00 | 0.070 |
| 2 |        |                                                             | 1,060  | 0.3%  | 1     |       |
| 1 | E66.3  | Overweight                                                  | 280    | 1.6%  | <0.00 | 0.064 |
| 2 |        |                                                             | 3,619  | 0.9%  | 1     |       |
| 1 | E66.8  | Other obesity                                               | 118    | 0.7%  | <0.00 | 0.084 |
| 2 |        |                                                             | 574    | 0.1%  | 1     |       |

|   |        |                                                              |        |       |       |       |
|---|--------|--------------------------------------------------------------|--------|-------|-------|-------|
| 1 | E66.9  | Obesity, unspecified                                         | 4,568  | 26.4% | <0.00 | 0.291 |
| 2 |        |                                                              | 59,095 | 14.8% | 1     |       |
| 1 | Z72.3  | Lack of physical exercise                                    | 10     | 0.1%  | 0.110 | 0.011 |
| 2 |        |                                                              | 138    | 0.0%  |       |       |
| 1 | Z72.4  | Inappropriate diet and eating habits                         | 30     | 0.2%  | <0.00 | 0.050 |
| 2 |        |                                                              | 73     | 0.0%  | 1     |       |
| 1 | Z79.89 | Hormone replacement therapy                                  | 85     | 0.5%  | <0.00 | 0.025 |
| 2 | 0      |                                                              | 1,319  | 0.3%  | 1     |       |
| 1 | Z92.23 | Personal history of estrogen therapy                         | 10     | 0.1%  | 0.030 | 0.014 |
| 2 |        |                                                              | 115    | 0.0%  |       |       |
| 1 | E28.2  | Polycystic ovarian syndrome                                  | 264    | 1.5%  | <0.00 | 0.060 |
| 2 |        |                                                              | 3,504  | 0.9%  | 1     |       |
| 1 | Z80.41 | Family history of malignant neoplasm of ovary                | 50     | 0.3%  | <0.00 | 0.032 |
| 2 |        |                                                              | 568    | 0.1%  | 1     |       |
| 1 | Z80.49 | Family history of malignant neoplasm of other genital organs | 27     | 0.2%  | <0.00 | 0.027 |
| 2 |        |                                                              | 261    | 0.1%  | 1     |       |
| 1 | N85.0  | Endometrial hyperplasia                                      | 94     | 0.5%  | <0.00 | 0.026 |
| 2 |        |                                                              | 1,487  | 0.4%  | 1     |       |
| 1 | D25    | Leiomyoma of uterus                                          | 470    | 2.7%  | 0.026 | 0.017 |
| 2 |        |                                                              | 9,804  | 2.5%  |       |       |
| 1 | D26    | Other benign neoplasms of uterus                             | 20     | 0.1%  | 0.703 | 0.003 |
| 2 |        |                                                              | 505    | 0.1%  |       |       |
| 1 | D27    | Benign neoplasm of ovary                                     | 39     | 0.2%  | 0.871 | 0.001 |
| 2 |        |                                                              | 879    | 0.2%  |       |       |
| 1 | Z80.3  | Family history of malignant neoplasm of breast               | 390    | 2.3%  | <0.00 | 0.081 |
| 2 |        |                                                              | 4,796  | 1.2%  | 1     |       |

### Procedure

| Group | Mean ± SD | Patients | % of Group | P-Value | SMD   |
|-------|-----------|----------|------------|---------|-------|
| 1     |           | 122      | 0.7%       | <0.00   | 0.062 |
| 2     |           | 1,090    | 0.3%       | 1       |       |
| 1     |           | 43       | 0.2%       | 0.047   | 0.016 |
| 2     |           | 1,352    | 0.3%       |         |       |

### Medication

| Group | Mean ± SD | Patients | % of Group | P-Value | SMD |
|-------|-----------|----------|------------|---------|-----|
|-------|-----------|----------|------------|---------|-----|

|   |       |                                                    |        |       |       |       |
|---|-------|----------------------------------------------------|--------|-------|-------|-------|
| 1 | A10A  | INSULINS AND ANALOGUES                             | 7,387  | 42.8% | <0.00 | 0.558 |
| 2 |       |                                                    | 72,077 | 18.0% | 1     |       |
| 1 | A10B  | Sulfonylureas                                      | 2,808  | 16.3% | <0.00 | 0.261 |
| 2 | B     |                                                    | 31,308 | 7.8%  | 1     |       |
| 1 | A10B  | Alpha glucosidase inhibitors                       | 60     | 0.3%  | <0.00 | 0.050 |
| 2 | F     |                                                    | 436    | 0.1%  | 1     |       |
| 1 | A10B  | Thiazolidinediones                                 | 974    | 5.6%  | <0.00 | 0.172 |
| 2 | G     |                                                    | 9,195  | 2.3%  | 1     |       |
| 1 | A10B  | Dipeptidyl peptidase 4 (DPP-4) inhibitors          | 1,906  | 11.0% | <0.00 | 0.374 |
| 2 | H     |                                                    | 7,852  | 2.0%  | 1     |       |
| 1 | A10B  | Sodium-glucose co-transporter 2 (SGLT2) inhibitors | 918    | 5.3%  | <0.00 | 0.305 |
| 2 | K     |                                                    | 1,296  | 0.3%  | 1     |       |
| 1 | A10B  | Other blood glucose lowering drugs, excl. insulins | 349    | 2.0%  | <0.00 | 0.142 |
| 2 | X     |                                                    | 1,821  | 0.5%  | 1     |       |
| 1 | HS200 | CONTRACEPTIVE S,SYSTEMIC                           | 718    | 4.2%  | <0.00 | 0.084 |
| 2 |       |                                                    | 10,566 | 2.6%  | 1     |       |
| 1 | 10324 | tamoxifen                                          | 17     | 0.1%  | 0.246 | 0.008 |
| 2 |       |                                                    | 295    | 0.1%  |       |       |

**Group 1 (N = 17,168) and group 2 (N = 17,168) characteristics after propensity score matching**

**Demographics**

| Group |        | Mean ± SD                                 | Patients | % of Group | P-Value | SMD   |
|-------|--------|-------------------------------------------|----------|------------|---------|-------|
| 1     | AI     | Age at Index                              | 17,168   | 100%       | 0.118   | 0.017 |
| 2     |        |                                           | 17,168   | 100%       |         |       |
| 1     | 2106-3 | White                                     | 11,256   | 65.6%      | 0.001   | 0.036 |
| 2     |        |                                           | 11,549   | 67.3%      |         |       |
| 1     | 1002-5 | American Indian or Alaska Native          | 59       | 0.3%       | 0.926   | 0.001 |
| 2     |        |                                           | 58       | 0.3%       |         |       |
| 1     | UNK    | Unknown Race                              | 1,559    | 9.1%       | 0.298   | 0.011 |
| 2     |        |                                           | 1,504    | 8.8%       |         |       |
| 1     | 2076-8 | Native Hawaiian or Other Pacific Islander | 80       | 0.5%       | 0.937   | 0.001 |
| 2     |        |                                           | 79       | 0.5%       |         |       |
| 1     | UN     | Unknown Ethnicity                         | 3,140    | 18.3%      | 0.044   | 0.022 |
| 2     |        |                                           | 2,997    | 17.5%      |         |       |
| 1     | 2186-5 | Not Hispanic or Latino                    | 12,387   | 72.2%      | 0.001   | 0.036 |
| 2     |        |                                           | 12,659   | 73.7%      |         |       |

| 1                | 2135-2 | Hispanic or Latino                                                                            | 1,641     | 9.6%     | 0.016      | 0.026   |       |
|------------------|--------|-----------------------------------------------------------------------------------------------|-----------|----------|------------|---------|-------|
| 2                |        |                                                                                               | 1,512     | 8.8%     |            |         |       |
| 1                | 2054-5 | Black or African American                                                                     | 3,454     | 20.1%    | 0.071      | 0.019   |       |
| 2                |        |                                                                                               | 3,321     | 19.3%    |            |         |       |
| 1                | 2028-9 | Asian                                                                                         | 310       | 1.8%     | 0.025      | 0.024   |       |
| 2                |        |                                                                                               | 257       | 1.5%     |            |         |       |
| <b>Diagnosis</b> |        |                                                                                               |           |          |            |         |       |
| Group            |        |                                                                                               | Mean ± SD | Patients | % of Group | P-Value | SMD   |
| 1                | Z55-   | Persons with potential health hazards related to socioeconomic and psychosocial circumstances |           | 268      | 1.6%       | 0.151   | 0.015 |
| 2                | Z65    |                                                                                               |           | 236      | 1.4%       |         |       |
| 1                | E66    | Overweight and obesity                                                                        |           | 6,388    | 37.2%      | 0.615   | 0.005 |
| 2                |        |                                                                                               |           | 6,343    | 36.9%      |         |       |
| 1                | Z68.3  | Body mass index [BMI] 30-39, adult                                                            |           | 1,331    | 7.8%       | 0.516   | 0.007 |
| 2                |        |                                                                                               |           | 1,299    | 7.6%       |         |       |
| 1                | Z68.4  | Body mass index [BMI] 40 or greater, adult                                                    |           | 1,636    | 9.5%       | 0.300   | 0.011 |
| 2                |        |                                                                                               |           | 1,580    | 9.2%       |         |       |
| 1                | Z68.25 | Body mass index [BMI] 25.0-25.9, adult                                                        |           | 38       | 0.2%       | 0.075   | 0.019 |
| 2                |        |                                                                                               |           | 24       | 0.1%       |         |       |
| 1                | Z68.26 | Body mass index [BMI] 26.0-26.9, adult                                                        |           | 51       | 0.3%       | 0.350   | 0.010 |
| 2                |        |                                                                                               |           | 42       | 0.2%       |         |       |
| 1                | Z68.27 | Body mass index [BMI] 27.0-27.9, adult                                                        |           | 58       | 0.3%       | 0.851   | 0.002 |
| 2                |        |                                                                                               |           | 56       | 0.3%       |         |       |
| 1                | Z68.28 | Body mass index [BMI] 28.0-28.9, adult                                                        |           | 66       | 0.4%       | 0.364   | 0.010 |
| 2                |        |                                                                                               |           | 56       | 0.3%       |         |       |
| 1                | Z68.29 | Body mass index [BMI] 29.0-29.9, adult                                                        |           | 75       | 0.4%       | 0.140   | 0.016 |
| 2                |        |                                                                                               |           | 58       | 0.3%       |         |       |
| 1                | Z80    | Family history of primary malignant neoplasm                                                  |           | 798      | 4.6%       | 0.031   | 0.023 |
| 2                |        |                                                                                               |           | 716      | 4.2%       |         |       |

|   |         |                                                              |       |       |        |        |
|---|---------|--------------------------------------------------------------|-------|-------|--------|--------|
| 1 | Z15.0   | Genetic susceptibility to malignant neoplasm                 | 15    | 0.1%  | 0.433  | 0.008  |
| 2 |         |                                                              | 11    | 0.1%  |        |        |
| 1 | Z12     | Encounter for screening for malignant neoplasms              | 4,054 | 23.6% | <0.001 | 0.053  |
| 2 |         |                                                              | 3,674 | 21.4% |        |        |
| 1 | Z85     | Personal history of malignant neoplasm                       | 488   | 2.8%  | 0.077  | 0.019  |
| 2 |         |                                                              | 435   | 2.5%  |        |        |
| 1 | Z98.84  | Bariatric surgery status                                     | 365   | 2.1%  | 0.624  | 0.005  |
| 2 |         |                                                              | 352   | 2.1%  |        |        |
| 1 | E66.0   | Obesity due to excess calories                               | 3,402 | 19.8% | 0.978  | <0.001 |
| 2 |         |                                                              | 3,400 | 19.8% |        |        |
| 1 | E66.2   | Morbid (severe) obesity with alveolar hypoventilation        | 131   | 0.8%  | 0.197  | 0.014  |
| 2 |         |                                                              | 111   | 0.6%  |        |        |
| 1 | E66.3   | Overweight                                                   | 274   | 1.6%  | 0.082  | 0.019  |
| 2 |         |                                                              | 235   | 1.4%  |        |        |
| 1 | E66.8   | Other obesity                                                | 112   | 0.7%  | 0.947  | 0.001  |
| 2 |         |                                                              | 113   | 0.7%  |        |        |
| 1 | E66.9   | Obesity, unspecified                                         | 4,514 | 26.3% | 0.319  | 0.011  |
| 2 |         |                                                              | 4,433 | 25.8% |        |        |
| 1 | Z72.3   | Lack of physical exercise                                    | 10    | 0.1%  | 1      | <0.001 |
| 2 |         |                                                              | 10    | 0.1%  |        |        |
| 1 | Z72.4   | Inappropriate diet and eating habits                         | 25    | 0.1%  | 0.500  | 0.007  |
| 2 |         |                                                              | 30    | 0.2%  |        |        |
| 1 | Z79.890 | Hormone replacement therapy                                  | 83    | 0.5%  | 0.190  | 0.014  |
| 2 |         |                                                              | 67    | 0.4%  |        |        |
| 1 | Z92.23  | Personal history of estrogen therapy                         | 10    | 0.1%  | 1      | <0.001 |
| 2 |         |                                                              | 10    | 0.1%  |        |        |
| 1 | E28.2   | Polycystic ovarian syndrome                                  | 260   | 1.5%  | 0.445  | 0.008  |
| 2 |         |                                                              | 243   | 1.4%  |        |        |
| 1 | Z80.41  | Family history of malignant neoplasm of ovary                | 47    | 0.3%  | 0.835  | 0.002  |
| 2 |         |                                                              | 45    | 0.3%  |        |        |
| 1 | Z80.49  | Family history of malignant neoplasm of other genital organs | 27    | 0.2%  | 0.386  | 0.009  |
| 2 |         |                                                              | 21    | 0.1%  |        |        |
| 1 | N85.0   | Endometrial hyperplasia                                      | 93    | 0.5%  | 0.548  | 0.006  |
| 2 |         |                                                              | 85    | 0.5%  |        |        |
| 1 | D25     | Leiomyoma of uterus                                          | 465   | 2.7%  | 0.025  | 0.024  |
| 2 |         |                                                              | 400   | 2.3%  |        |        |



|                   |       |                                                    |           |          |            |         |       |
|-------------------|-------|----------------------------------------------------|-----------|----------|------------|---------|-------|
| 1                 | D26   | Other benign neoplasms of uterus                   | 20        | 0.1%     | 0.505      | 0.007   |       |
| 2                 |       |                                                    | 16        | 0.1%     |            |         |       |
| 1                 | D27   | Benign neoplasm of ovary                           | 38        | 0.2%     | 0.133      | 0.016   |       |
| 2                 |       |                                                    | 26        | 0.2%     |            |         |       |
| 1                 | Z80.3 | Family history of malignant neoplasm of breast     | 380       | 2.2%     | 0.036      | 0.023   |       |
| 2                 |       |                                                    | 325       | 1.9%     |            |         |       |
| <b>Procedure</b>  |       |                                                    |           |          |            |         |       |
| Group             |       |                                                    | Mean ± SD | Patients | % of Group | P-Value | SMD   |
| 1                 | 58300 | Insertion of intrauterine device (IUD)             |           | 118      | 0.7%       | 0.792   | 0.003 |
| 2                 |       |                                                    |           | 114      | 0.7%       |         |       |
| 1                 | 1001  | Radiation                                          |           | 43       | 0.3%       | 0.578   | 0.006 |
| 2                 |       |                                                    |           | 38       | 0.2%       |         |       |
| <b>Medication</b> |       |                                                    |           |          |            |         |       |
| Group             |       |                                                    | Mean ± SD | Patients | % of Group | P-Value | SMD   |
| 1                 | A10A  | INSULINS AND ANALOGUES                             |           | 7,290    | 42.5%      | 0.686   | 0.004 |
| 2                 |       |                                                    |           | 7,253    | 42.2%      |         |       |
| 1                 | A10B  | Sulfonylureas                                      |           | 2,753    | 16.0%      | 0.941   | 0.001 |
| 2                 | B     |                                                    |           | 2,748    | 16.0%      |         |       |
| 1                 | A10B  | Alpha glucosidase inhibitors                       |           | 59       | 0.3%       | 0.570   | 0.006 |
| 2                 | F     |                                                    |           | 53       | 0.3%       |         |       |
| 1                 | A10B  | Thiazolidinediones                                 |           | 949      | 5.5%       | 0.340   | 0.010 |
| 2                 | G     |                                                    |           | 909      | 5.3%       |         |       |
| 1                 | A10B  | Dipeptidyl peptidase 4 (DPP-4) inhibitors          |           | 1,827    | 10.6%      | 0.650   | 0.005 |
| 2                 | H     |                                                    |           | 1,853    | 10.8%      |         |       |
| 1                 | A10B  | Sodium-glucose co-transporter 2 (SGLT2) inhibitors |           | 817      | 4.8%       | 0.021   | 0.025 |
| 2                 | K     |                                                    |           | 728      | 4.2%       |         |       |
| 1                 | A10B  | Other blood glucose lowering drugs, excl. insulins |           | 328      | 1.9%       | 0.639   | 0.005 |
| 2                 | X     |                                                    |           | 340      | 2.0%       |         |       |
| 1                 | HS200 | CONTRACEPTIVE S,SYSTEMIC                           |           | 704      | 4.1%       | 0.023   | 0.024 |
| 2                 |       |                                                    |           | 623      | 3.6%       |         |       |
| 1                 | 10324 | tamoxifen                                          |           | 17       | 0.1%       | 0.862   | 0.002 |
| 2                 |       |                                                    |           | 16       | 0.1%       |         |       |

eTable 18. Characteristics of the GLP-1RA/no metformin group and metformin/no GLP-1RA group before and after matched for covariates related to gallbladder cancer for the study populations of patients with T2D and no history of any OAC

| <b>Group 1 (N = 32,365) and group 2 (N = 856,160) characteristics before propensity score matching</b> |        |                                                                                               |               |            |         |       |       |
|--------------------------------------------------------------------------------------------------------|--------|-----------------------------------------------------------------------------------------------|---------------|------------|---------|-------|-------|
| <b>Demographics</b>                                                                                    |        |                                                                                               |               |            |         |       |       |
| Group                                                                                                  |        | Mean ± SD                                                                                     | Patients      | % of Group | P-Value | SMD   |       |
| 1                                                                                                      | AI     | Age at Index                                                                                  | 59.0 +/- 12.4 | 32,365     | 100%    | <0.00 | 0.080 |
| 2                                                                                                      |        |                                                                                               | 60.1 +/- 14.0 | 856,160    | 100%    | 1     |       |
| 1                                                                                                      | 2106-3 | White                                                                                         |               | 21,231     | 65.6%   | <0.00 | 0.111 |
| 2                                                                                                      |        |                                                                                               |               | 515,868    | 60.3%   | 1     |       |
| 1                                                                                                      | UNK    | Unknown Race                                                                                  |               | 4,272      | 13.2%   | <0.00 | 0.021 |
| 2                                                                                                      |        |                                                                                               |               | 119,036    | 13.9%   | 1     |       |
| 1                                                                                                      | F      | Female                                                                                        |               | 17,278     | 53.4%   | <0.00 | 0.134 |
| 2                                                                                                      |        |                                                                                               |               | 399,923    | 46.7%   | 1     |       |
| 1                                                                                                      | UN     | Unknown Gender                                                                                |               | 1,670      | 5.2%    | <0.00 | 0.152 |
| 2                                                                                                      |        |                                                                                               |               | 19,592     | 2.3%    | 1     |       |
| 1                                                                                                      | 2186-5 | Not Hispanic or Latino                                                                        |               | 22,299     | 68.9%   | <0.00 | 0.151 |
| 2                                                                                                      |        |                                                                                               |               | 528,686    | 61.8%   | 1     |       |
| 1                                                                                                      | 2135-2 | Hispanic or Latino                                                                            |               | 2,660      | 8.2%    | <0.00 | 0.084 |
| 2                                                                                                      |        |                                                                                               |               | 91,303     | 10.7%   | 1     |       |
| 1                                                                                                      | 2054-5 | Black or African American                                                                     |               | 5,107      | 15.8%   | <0.00 | 0.021 |
| 2                                                                                                      |        |                                                                                               |               | 141,606    | 16.5%   | 1     |       |
| 1                                                                                                      | M      | Male                                                                                          |               | 13,417     | 41.5%   | <0.00 | 0.192 |
| 2                                                                                                      |        |                                                                                               |               | 436,645    | 51.0%   | 1     |       |
| 1                                                                                                      | 2028-9 | Asian                                                                                         |               | 681        | 2.1%    | <0.00 | 0.118 |
| 2                                                                                                      |        |                                                                                               |               | 35,540     | 4.2%    | 1     |       |
| <b>Diagnosis</b>                                                                                       |        |                                                                                               |               |            |         |       |       |
| Group                                                                                                  |        | Mean ± SD                                                                                     | Patients      | % of Group | P-Value | SMD   |       |
| 1                                                                                                      | Z55-   | Persons with potential health hazards related to socioeconomic and psychosocial circumstances | 422           | 1.3%       | 0.107   | 0.009 |       |
| 2                                                                                                      | Z65    |                                                                                               | 10,310        | 1.2%       |         |       |       |
| 1                                                                                                      | E66    | Overweight and obesity                                                                        | 11,418        | 35.3%      | <0.00   | 0.411 |       |
| 2                                                                                                      |        |                                                                                               | 149,974       | 17.5%      | 1       |       |       |
| 1                                                                                                      | Z68.3  | Body mass index [BMI] 30-39, adult                                                            | 3,285         | 10.1%      | <0.00   | 0.249 |       |
| 2                                                                                                      |        |                                                                                               | 32,977        | 3.9%       | 1       |       |       |

|        |        |                                                       |                  |                |            |       |
|--------|--------|-------------------------------------------------------|------------------|----------------|------------|-------|
| 1<br>2 | Z68.4  | Body mass index [BMI] 40 or greater, adult            | 3,012<br>23,535  | 9.3%<br>2.7%   | <0.00<br>1 | 0.278 |
| 1<br>2 | Z68.25 | Body mass index [BMI] 25.0-25.9, adult                | 119<br>2,293     | 0.4%<br>0.3%   | 0.001      | 0.018 |
| 1<br>2 | Z68.26 | Body mass index [BMI] 26.0-26.9, adult                | 150<br>2,433     | 0.5%<br>0.3%   | <0.00<br>1 | 0.029 |
| 1<br>2 | Z68.27 | Body mass index [BMI] 27.0-27.9, adult                | 209<br>2,942     | 0.6%<br>0.3%   | <0.00<br>1 | 0.043 |
| 1<br>2 | Z68.28 | Body mass index [BMI] 28.0-28.9, adult                | 264<br>3,317     | 0.8%<br>0.4%   | <0.00<br>1 | 0.055 |
| 1<br>2 | Z68.29 | Body mass index [BMI] 29.0-29.9, adult                | 299<br>3,753     | 0.9%<br>0.4%   | <0.00<br>1 | 0.059 |
| 1<br>2 | F10    | Alcohol related disorders                             | 460<br>21,150    | 1.4%<br>2.5%   | <0.00<br>1 | 0.076 |
| 1<br>2 | Z80    | Family history of primary malignant neoplasm          | 1,222<br>16,133  | 3.8%<br>1.9%   | <0.00<br>1 | 0.114 |
| 1<br>2 | Z15.0  | Genetic susceptibility to malignant neoplasm          | 18<br>140        | 0.1%<br>0.0%   | <0.00<br>1 | 0.021 |
| 1<br>2 | Z12    | Encounter for screening for malignant neoplasms       | 6,223<br>114,996 | 19.2%<br>13.4% | <0.00<br>1 | 0.157 |
| 1<br>2 | Z85    | Personal history of malignant neoplasm                | 1,111<br>23,231  | 3.4%<br>2.7%   | <0.00<br>1 | 0.042 |
| 1<br>2 | Z98.84 | Bariatric surgery status                              | 534<br>2,989     | 1.6%<br>0.3%   | <0.00<br>1 | 0.131 |
| 1<br>2 | F17    | Nicotine dependence                                   | 2,399<br>77,335  | 7.4%<br>9.0%   | <0.00<br>1 | 0.059 |
| 1<br>2 | E66.0  | Obesity due to excess calories                        | 5,910<br>56,178  | 18.3%<br>6.6%  | <0.00<br>1 | 0.361 |
| 1<br>2 | E66.2  | Morbid (severe) obesity with alveolar hypoventilation | 230<br>2,051     | 0.7%<br>0.2%   | <0.00<br>1 | 0.069 |
| 1<br>2 | E66.3  | Overweight                                            | 535<br>7,794     | 1.7%<br>0.9%   | <0.00<br>1 | 0.066 |

|   |        |                                                                  |         |       |       |        |
|---|--------|------------------------------------------------------------------|---------|-------|-------|--------|
| 1 | E66.8  | Other obesity                                                    | 193     | 0.6%  | <0.00 | 0.078  |
| 2 |        |                                                                  | 1,084   | 0.1%  | 1     |        |
| 1 | E66.9  | Obesity, unspecified                                             | 8,150   | 25.2% | <0.00 | 0.307  |
| 2 |        |                                                                  | 113,380 | 13.2% | 1     |        |
| 1 | Z72.0  | Tobacco use                                                      | 588     | 1.8%  | <0.00 | 0.034  |
| 2 |        |                                                                  | 11,927  | 1.4%  | 1     |        |
| 1 | K80    | Cholelithiasis                                                   | 871     | 2.7%  | <0.00 | 0.039  |
| 2 |        |                                                                  | 17,909  | 2.1%  | 1     |        |
| 1 | K82.8  | Other specified diseases of gallbladder                          | 129     | 0.4%  | <0.00 | 0.026  |
| 2 |        |                                                                  | 2,130   | 0.2%  | 1     |        |
| 1 | Q44.4  | Choledochal cyst                                                 | 10      | 0.0%  | 0.119 | 0.008  |
| 2 |        |                                                                  | 160     | 0.0%  |       |        |
| 1 | Q44.5  | Other congenital malformations of bile ducts                     | 10      | 0.0%  | 0.684 | 0.002  |
| 2 |        |                                                                  | 232     | 0.0%  |       |        |
| 1 | K82.4  | Cholesterolosis of gallbladder                                   | 55      | 0.2%  | 0.006 | 0.014  |
| 2 |        |                                                                  | 998     | 0.1%  |       |        |
| 1 | K83.0  | Primary sclerosing cholangitis                                   | 10      | 0.0%  | <0.00 | 0.020  |
| 2 | 1      |                                                                  | 36      | 0.0%  | 1     |        |
| 1 | A01.0  | Typhoid fever                                                    | 10      | 0.0%  | <0.00 | 0.023  |
| 2 |        |                                                                  | 17      | 0.0%  | 1     |        |
| 1 | Z85.09 | Personal history of malignant neoplasm of other digestive organs | 10      | 0.0%  | 0.032 | 0.010  |
| 2 |        |                                                                  | 133     | 0.0%  |       |        |
| 1 | D13.5  | Benign neoplasm of extrahepatic bile ducts                       | 12      | 0.0%  | 0.944 | <0.001 |
| 2 |        |                                                                  | 311     | 0.0%  |       |        |

### Medication

| Group  | Mean ± SD                                 | Patients | % of Group | P-Value | SMD   |
|--------|-------------------------------------------|----------|------------|---------|-------|
| 1 A10A | INSULINS AND ANALOGUES                    | 14,131   | 43.7%      | <0.00   | 0.560 |
| 2      |                                           | 159,901  | 18.7%      | 1       |       |
| 1 A10B | Sulfonylureas                             | 5,464    | 16.9%      | <0.00   | 0.269 |
| 2 B    |                                           | 69,045   | 8.1%       | 1       |       |
| 1 A10B | Alpha glucosidase inhibitors              | 124      | 0.4%       | <0.00   | 0.057 |
| 2 F    |                                           | 876      | 0.1%       | 1       |       |
| 1 A10B | Thiazolidinediones                        | 1,960    | 6.1%       | <0.00   | 0.183 |
| 2 G    |                                           | 20,400   | 2.4%       | 1       |       |
| 1 A10B | Dipeptidyl peptidase 4 (DPP-4) inhibitors | 3,547    | 11.0%      | <0.00   | 0.370 |
| 2 H    |                                           | 17,113   | 2.0%       | 1       |       |

|   |      |                                                    |       |      |        |       |
|---|------|----------------------------------------------------|-------|------|--------|-------|
| 1 | A10B | Sodium-glucose co-transporter 2 (SGLT2) inhibitors | 1,839 | 5.7% | <0.001 | 0.312 |
| 2 | K    |                                                    | 3,371 | 0.4% |        |       |
| 1 | A10B | Other blood glucose lowering drugs, excl. insulins | 672   | 2.1% | <0.001 | 0.146 |
| 2 | X    |                                                    | 3,839 | 0.4% |        |       |

**Group 1 (N = 32,261) and group 2 (N = 32,261) characteristics after propensity score matching**

**Demographics**

| Group |        | Mean ± SD                 | Patients | % of Group | P-Value | SMD   |
|-------|--------|---------------------------|----------|------------|---------|-------|
| 1     | AI     | Age at Index              | 32,261   | 100%       | 0.493   | 0.005 |
| 2     |        |                           | 32,261   | 100%       |         |       |
| 1     | 2106-3 | White                     | 21,159   | 65.6%      | <0.001  | 0.034 |
| 2     |        |                           | 21,672   | 67.2%      |         |       |
| 1     | UNK    | Unknown Race              | 4,253    | 13.2%      | 0.237   | 0.009 |
| 2     |        |                           | 4,152    | 12.9%      |         |       |
| 1     | F      | Female                    | 17,211   | 53.3%      | 0.134   | 0.012 |
| 2     |        |                           | 17,401   | 53.9%      |         |       |
| 1     | UN     | Unknown Gender            | 1,654    | 5.1%       | 0.210   | 0.010 |
| 2     |        |                           | 1,725    | 5.3%       |         |       |
| 1     | 2186-5 | Not Hispanic or Latino    | 22,225   | 68.9%      | 0.011   | 0.020 |
| 2     |        |                           | 22,522   | 69.8%      |         |       |
| 1     | 2135-2 | Hispanic or Latino        | 2,653    | 8.2%       | 0.032   | 0.017 |
| 2     |        |                           | 2,505    | 7.8%       |         |       |
| 1     | 2054-5 | Black or African American | 5,095    | 15.8%      | 0.002   | 0.024 |
| 2     |        |                           | 4,817    | 14.9%      |         |       |
| 1     | M      | Male                      | 13,396   | 41.5%      | 0.037   | 0.016 |
| 2     |        |                           | 13,135   | 40.7%      |         |       |
| 1     | 2028-9 | Asian                     | 681      | 2.1%       | 0.011   | 0.020 |
| 2     |        |                           | 591      | 1.8%       |         |       |

**Diagnosis**

| Group |             | Mean ± SD                                                                                     | Patients | % of Group | P-Value | SMD   |
|-------|-------------|-----------------------------------------------------------------------------------------------|----------|------------|---------|-------|
| 1     | Z55-<br>Z65 | Persons with potential health hazards related to socioeconomic and psychosocial circumstances | 420      | 1.3%       | 0.021   | 0.018 |
| 2     |             |                                                                                               | 356      | 1.1%       |         |       |
| 1     | E66         | Overweight and obesity                                                                        | 11,341   | 35.2%      | 0.863   | 0.001 |
| 2     |             |                                                                                               | 11,362   | 35.2%      |         |       |

|   |        |                                                             |       |       |            |        |
|---|--------|-------------------------------------------------------------|-------|-------|------------|--------|
| 1 | Z68.3  | Body mass index<br>[BMI] 30-39, adult                       | 3,255 | 10.1% | 0.675      | 0.003  |
| 2 |        |                                                             | 3,223 | 10.0% |            |        |
| 1 | Z68.4  | Body mass index<br>[BMI] 40 or greater,<br>adult            | 2,967 | 9.2%  | 0.081      | 0.014  |
| 2 |        |                                                             | 2,840 | 8.8%  |            |        |
| 1 | Z68.25 | Body mass index<br>[BMI] 25.0-25.9,<br>adult                | 119   | 0.4%  | 0.645      | 0.004  |
| 2 |        |                                                             | 112   | 0.3%  |            |        |
| 1 | Z68.26 | Body mass index<br>[BMI] 26.0-26.9,<br>adult                | 149   | 0.5%  | 0.049      | 0.015  |
| 2 |        |                                                             | 117   | 0.4%  |            |        |
| 1 | Z68.27 | Body mass index<br>[BMI] 27.0-27.9,<br>adult                | 209   | 0.6%  | 0.073      | 0.014  |
| 2 |        |                                                             | 174   | 0.5%  |            |        |
| 1 | Z68.28 | Body mass index<br>[BMI] 28.0-28.9,<br>adult                | 263   | 0.8%  | 0.372      | 0.007  |
| 2 |        |                                                             | 243   | 0.8%  |            |        |
| 1 | Z68.29 | Body mass index<br>[BMI] 29.0-29.9,<br>adult                | 298   | 0.9%  | 0.516      | 0.005  |
| 2 |        |                                                             | 314   | 1.0%  |            |        |
| 1 | F10    | Alcohol related<br>disorders                                | 459   | 1.4%  | <0.00<br>1 | 0.029  |
| 2 |        |                                                             | 356   | 1.1%  |            |        |
| 1 | Z80    | Family history of<br>primary malignant<br>neoplasm          | 1,210 | 3.8%  | 0.004      | 0.022  |
| 2 |        |                                                             | 1,076 | 3.3%  |            |        |
| 1 | Z15.0  | Genetic<br>susceptibility to<br>malignant neoplasm          | 18    | 0.1%  | 0.869      | 0.001  |
| 2 |        |                                                             | 19    | 0.1%  |            |        |
| 1 | Z12    | Encounter for<br>screening for<br>malignant neoplasms       | 6,177 | 19.1% | <0.00<br>1 | 0.049  |
| 2 |        |                                                             | 5,562 | 17.2% |            |        |
| 1 | Z85    | Personal history of<br>malignant neoplasm                   | 1,106 | 3.4%  | 0.220      | 0.010  |
| 2 |        |                                                             | 1,050 | 3.3%  |            |        |
| 1 | Z98.84 | Bariatric surgery<br>status                                 | 517   | 1.6%  | 0.099      | 0.013  |
| 2 |        |                                                             | 571   | 1.8%  |            |        |
| 1 | F17    | Nicotine dependence                                         | 2,392 | 7.4%  | <0.00<br>1 | 0.034  |
| 2 |        |                                                             | 2,115 | 6.6%  |            |        |
| 1 | E66.0  | Obesity due to<br>excess calories                           | 5,850 | 18.1% | 0.967      | <0.001 |
| 2 |        |                                                             | 5,854 | 18.1% |            |        |
| 1 | E66.2  | Morbid (severe)<br>obesity with alveolar<br>hypoventilation | 228   | 0.7%  | 0.474      | 0.006  |
| 2 |        |                                                             | 213   | 0.7%  |            |        |

|   |        |                                        |       |       |       |        |
|---|--------|----------------------------------------|-------|-------|-------|--------|
| 1 | E66.3  | Overweight                             | 531   | 1.6%  | 0.065 | 0.015  |
| 2 |        |                                        | 473   | 1.5%  |       |        |
| 1 | E66.8  | Other obesity                          | 191   | 0.6%  | 0.918 | 0.001  |
| 2 |        |                                        | 189   | 0.6%  |       |        |
| 1 | E66.9  | Obesity, unspecified                   | 8,099 | 25.1% | 0.957 | <0.001 |
| 2 |        |                                        | 8,093 | 25.1% |       |        |
| 1 | Z72.0  | Tobacco use                            | 585   | 1.8%  | 0.001 | 0.026  |
| 2 |        |                                        | 477   | 1.5%  |       |        |
| 1 | K80    | Cholelithiasis                         | 866   | 2.7%  | 0.007 | 0.021  |
| 2 |        |                                        | 758   | 2.3%  |       |        |
| 1 | K82.8  | Other specified                        | 127   | 0.4%  | 0.565 | 0.005  |
| 2 |        | diseases of gallbladder                | 118   | 0.4%  |       |        |
| 1 | Q44.4  | Choledochal cyst                       | 10    | 0.0%  | 1     | <0.001 |
| 2 |        |                                        | 10    | 0.0%  |       |        |
| 1 | Q44.5  | Other congenital                       | 10    | 0.0%  | 1     | <0.001 |
| 2 |        | malformations of bile ducts            | 10    | 0.0%  |       |        |
| 1 | K82.4  | Cholesterolosis of gallbladder         | 55    | 0.2%  | 0.370 | 0.007  |
| 2 |        |                                        | 46    | 0.1%  |       |        |
| 1 | K83.0  | Primary sclerosing cholangitis         | 10    | 0.0%  | 1     | <0.001 |
| 2 | 1      |                                        | 10    | 0.0%  |       |        |
| 1 | A01.0  | Typhoid fever                          | 10    | 0.0%  | 1     | <0.001 |
| 2 |        |                                        | 10    | 0.0%  |       |        |
| 1 | Z85.09 | Personal history of malignant neoplasm | 10    | 0.0%  | 1     | <0.001 |
| 2 |        | of other digestive organs              | 10    | 0.0%  |       |        |
| 1 | D13.5  | Benign neoplasm of extrahepatic bile   | 12    | 0.0%  | 0.670 | 0.003  |
| 2 |        | ducts                                  | 10    | 0.0%  |       |        |

### Medication

| Group | Mean ± SD | Patients                     | % of Group | P-Value | SMD   |       |
|-------|-----------|------------------------------|------------|---------|-------|-------|
| 1     | A10A      | INSULINS AND ANALOGUES       | 14,038     | 43.5%   | 0.313 | 0.008 |
| 2     |           |                              | 13,911     | 43.1%   |       |       |
| 1     | A10B      | Sulfonylureas                | 5,421      | 16.8%   | 0.583 | 0.004 |
| 2     | B         |                              | 5,369      | 16.6%   |       |       |
| 1     | A10B      | Alpha glucosidase inhibitors | 122        | 0.4%    | 0.602 | 0.004 |
| 2     | F         |                              | 114        | 0.4%    |       |       |
| 1     | A10B      | Thiazolidinediones           | 1,932      | 6.0%    | 0.549 | 0.005 |
| 2     | G         |                              | 1,896      | 5.9%    |       |       |

|   |      |                                     |       |       |       |       |
|---|------|-------------------------------------|-------|-------|-------|-------|
| 1 | A10B | Dipeptidyl peptidase                | 3,467 | 10.7% |       |       |
| 2 | H    | 4 (DPP-4) inhibitors                | 3,412 | 10.6% | 0.483 | 0.006 |
| 1 | A10B | Sodium-glucose co-                  | 1,746 | 5.4%  |       |       |
| 2 | K    | transporter 2<br>(SGLT2) inhibitors | 1,578 | 4.9%  | 0.003 | 0.024 |
| 1 | A10B | Other blood glucose                 | 657   | 2.0%  |       |       |
| 2 | X    | lowering drugs, excl.<br>insulins   | 650   | 2.0%  | 0.845 | 0.002 |



eTable 19. Characteristics of the GLP-1RA/no metformin group and metformin/no GLP-1RA group before and after matched for covariates related to stomach cancer for the study populations of patients with T2D and no history of any OAC

| <b>Group 1 (N = 32,365) and group 2 (N = 856,160) characteristics before propensity score matching</b> |        |                                                                    |               |            |         |       |       |
|--------------------------------------------------------------------------------------------------------|--------|--------------------------------------------------------------------|---------------|------------|---------|-------|-------|
| <b>Demographics</b>                                                                                    |        |                                                                    |               |            |         |       |       |
| Group                                                                                                  |        | Mean ± SD                                                          | Patients      | % of Group | P-Value | SMD   |       |
| 1                                                                                                      | AI     | Age at Index                                                       | 59.0 +/- 12.4 | 32,365     | 100%    | <0.00 | 0.080 |
| 2                                                                                                      |        |                                                                    | 60.1 +/- 14.0 | 856,160    | 100%    | 1     |       |
| 1                                                                                                      | 2106-3 | White                                                              |               | 21,231     | 65.6%   | <0.00 | 0.111 |
| 2                                                                                                      |        |                                                                    |               | 515,868    | 60.3%   | 1     |       |
| 1                                                                                                      | 1002-5 | American Indian or Alaska Native                                   |               | 98         | 0.3%    | 0.092 | 0.010 |
| 2                                                                                                      |        |                                                                    |               | 3,080      | 0.4%    |       |       |
| 1                                                                                                      | UNK    | Unknown Race                                                       |               | 4,272      | 13.2%   | <0.00 | 0.021 |
| 2                                                                                                      |        |                                                                    |               | 119,036    | 13.9%   | 1     |       |
| 1                                                                                                      | F      | Female                                                             |               | 17,278     | 53.4%   | <0.00 | 0.134 |
| 2                                                                                                      |        |                                                                    |               | 399,923    | 46.7%   | 1     |       |
| 1                                                                                                      | 2076-8 | Native Hawaiian or Other Pacific Islander                          |               | 172        | 0.5%    | 0.001 | 0.020 |
| 2                                                                                                      |        |                                                                    |               | 5,884      | 0.7%    |       |       |
| 1                                                                                                      | UN     | Unknown Gender                                                     |               | 1,670      | 5.2%    | <0.00 | 0.152 |
| 2                                                                                                      |        |                                                                    |               | 19,592     | 2.3%    | 1     |       |
| 1                                                                                                      | 2186-5 | Not Hispanic or Latino                                             |               | 22,299     | 68.9%   | <0.00 | 0.151 |
| 2                                                                                                      |        |                                                                    |               | 528,686    | 61.8%   | 1     |       |
| 1                                                                                                      | 2135-2 | Hispanic or Latino                                                 |               | 2,660      | 8.2%    | <0.00 | 0.084 |
| 2                                                                                                      |        |                                                                    |               | 91,303     | 10.7%   | 1     |       |
| 1                                                                                                      | 2054-5 | Black or African American                                          |               | 5,107      | 15.8%   | <0.00 | 0.021 |
| 2                                                                                                      |        |                                                                    |               | 141,606    | 16.5%   | 1     |       |
| 1                                                                                                      | M      | Male                                                               |               | 13,417     | 41.5%   | <0.00 | 0.192 |
| 2                                                                                                      |        |                                                                    |               | 436,645    | 51.0%   | 1     |       |
| 1                                                                                                      | 2028-9 | Asian                                                              |               | 681        | 2.1%    | <0.00 | 0.118 |
| 2                                                                                                      |        |                                                                    |               | 35,540     | 4.2%    | 1     |       |
| <b>Diagnosis</b>                                                                                       |        |                                                                    |               |            |         |       |       |
| Group                                                                                                  |        | Mean ± SD                                                          | Patients      | % of Group | P-Value | SMD   |       |
| 1                                                                                                      | Z55-   | Persons with potential health hazards related to socioeconomic and | 422           | 1.3%       | 0.107   | 0.009 |       |
| 2                                                                                                      | Z65    |                                                                    | 10,310        | 1.2%       |         |       |       |

|   |        | psychosocial<br>circumstances                         |         |       |       |       |
|---|--------|-------------------------------------------------------|---------|-------|-------|-------|
| 1 | E66    | Overweight and<br>obesity                             | 11,418  | 35.3% | <0.00 | 0.411 |
| 2 |        |                                                       | 149,974 | 17.5% | 1     |       |
| 1 | Z68.3  | Body mass index<br>[BMI] 30-39, adult                 | 3,285   | 10.1% | <0.00 | 0.249 |
| 2 |        |                                                       | 32,977  | 3.9%  | 1     |       |
| 1 | Z68.4  | Body mass index<br>[BMI] 40 or greater,<br>adult      | 3,012   | 9.3%  | <0.00 | 0.278 |
| 2 |        |                                                       | 23,535  | 2.7%  | 1     |       |
| 1 | Z68.25 | Body mass index<br>[BMI] 25.0-25.9,<br>adult          | 119     | 0.4%  | 0.001 | 0.018 |
| 2 |        |                                                       | 2,293   | 0.3%  |       |       |
| 1 | Z68.26 | Body mass index<br>[BMI] 26.0-26.9,<br>adult          | 150     | 0.5%  | <0.00 | 0.029 |
| 2 |        |                                                       | 2,433   | 0.3%  | 1     |       |
| 1 | Z68.27 | Body mass index<br>[BMI] 27.0-27.9,<br>adult          | 209     | 0.6%  | <0.00 | 0.043 |
| 2 |        |                                                       | 2,942   | 0.3%  | 1     |       |
| 1 | Z68.28 | Body mass index<br>[BMI] 28.0-28.9,<br>adult          | 264     | 0.8%  | <0.00 | 0.055 |
| 2 |        |                                                       | 3,317   | 0.4%  | 1     |       |
| 1 | Z68.29 | Body mass index<br>[BMI] 29.0-29.9,<br>adult          | 299     | 0.9%  | <0.00 | 0.059 |
| 2 |        |                                                       | 3,753   | 0.4%  | 1     |       |
| 1 | F10    | Alcohol related<br>disorders                          | 460     | 1.4%  | <0.00 | 0.076 |
| 2 |        |                                                       | 21,150  | 2.5%  | 1     |       |
| 1 | Z80    | Family history of<br>primary malignant<br>neoplasm    | 1,222   | 3.8%  | <0.00 | 0.114 |
| 2 |        |                                                       | 16,133  | 1.9%  | 1     |       |
| 1 | Z15.0  | Genetic<br>susceptibility to<br>malignant neoplasm    | 18      | 0.1%  | <0.00 | 0.021 |
| 2 |        |                                                       | 140     | 0.0%  | 1     |       |
| 1 | Z12    | Encounter for<br>screening for<br>malignant neoplasms | 6,223   | 19.2% | <0.00 | 0.157 |
| 2 |        |                                                       | 114,996 | 13.4% | 1     |       |
| 1 | Z85    | Personal history of<br>malignant neoplasm             | 1,111   | 3.4%  | <0.00 | 0.042 |
| 2 |        |                                                       | 23,231  | 2.7%  | 1     |       |
| 1 | Z98.84 | Bariatric surgery<br>status                           | 534     | 1.6%  | <0.00 | 0.131 |
| 2 |        |                                                       | 2,989   | 0.3%  | 1     |       |
| 1 | F17    | Nicotine dependence                                   | 2,399   | 7.4%  | <0.00 | 0.059 |
| 2 |        |                                                       | 77,335  | 9.0%  | 1     |       |

|                   |        |                                                                               |          |            |         |       |
|-------------------|--------|-------------------------------------------------------------------------------|----------|------------|---------|-------|
| 1                 | E66.0  | Obesity due to excess calories                                                | 5,910    | 18.3%      | <0.00   | 0.361 |
| 2                 |        |                                                                               | 56,178   | 6.6%       | 1       |       |
| 1                 | E66.2  | Morbid (severe) obesity with alveolar hypoventilation                         | 230      | 0.7%       | <0.00   | 0.069 |
| 2                 |        |                                                                               | 2,051    | 0.2%       | 1       |       |
| 1                 | E66.3  | Overweight                                                                    | 535      | 1.7%       | <0.00   | 0.066 |
| 2                 |        |                                                                               | 7,794    | 0.9%       | 1       |       |
| 1                 | E66.8  | Other obesity                                                                 | 193      | 0.6%       | <0.00   | 0.078 |
| 2                 |        |                                                                               | 1,084    | 0.1%       | 1       |       |
| 1                 | E66.9  | Obesity, unspecified                                                          | 8,150    | 25.2%      | <0.00   | 0.307 |
| 2                 |        |                                                                               | 113,380  | 13.2%      | 1       |       |
| 1                 | Z72.0  | Tobacco use                                                                   | 588      | 1.8%       | <0.00   | 0.034 |
| 2                 |        |                                                                               | 11,927   | 1.4%       | 1       |       |
| 1                 | Z85.09 | Personal history of malignant neoplasm of other digestive organs              | 10       | 0.0%       | 0.032   | 0.010 |
| 2                 |        |                                                                               | 133      | 0.0%       |         |       |
| 1                 | B96.8  | Helicobacter pylori [H. pylori] as the cause of diseases classified elsewhere | 141      | 0.4%       | 0.259   | 0.006 |
| 2                 | 1      |                                                                               | 3,386    | 0.4%       |         |       |
| 1                 | D13.1  | Benign neoplasm of stomach                                                    | 163      | 0.5%       | <0.00   | 0.038 |
| 2                 |        |                                                                               | 2,312    | 0.3%       | 1       |       |
| 1                 | K31.7  | Polyp of stomach and duodenum                                                 | 216      | 0.7%       | <0.00   | 0.052 |
| 2                 |        |                                                                               | 2,635    | 0.3%       | 1       |       |
| 1                 | D51.0  | Vitamin B12 deficiency anemia due to intrinsic factor deficiency              | 103      | 0.3%       | <0.00   | 0.028 |
| 2                 |        |                                                                               | 1,532    | 0.2%       | 1       |       |
| 1                 | Z80.0  | Family history of malignant neoplasm of digestive organs                      | 413      | 1.3%       | <0.00   | 0.055 |
| 2                 |        |                                                                               | 6,255    | 0.7%       | 1       |       |
| 1                 | D83    | Common variable immunodeficiency                                              | 21       | 0.1%       | <0.00   | 0.019 |
| 2                 |        |                                                                               | 206      | 0.0%       | 1       |       |
| 1                 | B27    | Infectious mononucleosis                                                      | 30       | 0.1%       | <0.00   | 0.017 |
| 2                 |        |                                                                               | 409      | 0.0%       | 1       |       |
| <b>Procedure</b>  |        |                                                                               |          |            |         |       |
| Group             |        | Mean ± SD                                                                     | Patients | % of Group | P-Value | SMD   |
| 1                 | 10073  | Excision Procedures on the Stomach                                            | 10       | 0.0%       | <0.00   | 0.016 |
| 2                 | 52     |                                                                               | 76       | 0.0%       | 1       |       |
| <b>Medication</b> |        |                                                                               |          |            |         |       |

| Group |      | Mean ± SD                                          | Patients | % of Group | P-Value | SMD   |
|-------|------|----------------------------------------------------|----------|------------|---------|-------|
| 1     | A10A | INSULINS AND ANALOGUES                             | 14,131   | 43.7%      | <0.00   | 0.560 |
| 2     |      |                                                    | 159,901  | 18.7%      | 1       |       |
| 1     | A10B | Sulfonylureas                                      | 5,464    | 16.9%      | <0.00   | 0.269 |
| 2     | B    |                                                    | 69,045   | 8.1%       | 1       |       |
| 1     | A10B | Alpha glucosidase inhibitors                       | 124      | 0.4%       | <0.00   | 0.057 |
| 2     | F    |                                                    | 876      | 0.1%       | 1       |       |
| 1     | A10B | Thiazolidinediones                                 | 1,960    | 6.1%       | <0.00   | 0.183 |
| 2     | G    |                                                    | 20,400   | 2.4%       | 1       |       |
| 1     | A10B | Dipeptidyl peptidase 4 (DPP-4) inhibitors          | 3,547    | 11.0%      | <0.00   | 0.370 |
| 2     | H    |                                                    | 17,113   | 2.0%       | 1       |       |
| 1     | A10B | Sodium-glucose co-transporter 2 (SGLT2) inhibitors | 1,839    | 5.7%       | <0.00   | 0.312 |
| 2     | K    |                                                    | 3,371    | 0.4%       | 1       |       |
| 1     | A10B | Other blood glucose lowering drugs, excl. insulins | 672      | 2.1%       | <0.00   | 0.146 |
| 2     | X    |                                                    | 3,839    | 0.4%       | 1       |       |

**Group 1 (N = 32,268) and group 2 (N = 32,268) characteristics after propensity score matching**

**Demographics**

| Group |        | Mean ± SD                                 | Patients      | % of Group | P-Value | SMD   |
|-------|--------|-------------------------------------------|---------------|------------|---------|-------|
| 1     | AI     | Age at Index                              | 59.0 +/- 12.4 | 32,268     | 100%    | 0.025 |
| 2     |        |                                           | 58.8 +/- 13.3 | 32,268     | 100%    |       |
| 1     | 2106-3 | White                                     | 21,162        | 65.6%      | <0.00   | 0.028 |
| 2     |        |                                           | 21,585        | 66.9%      | 1       |       |
| 1     | 1002-5 | American Indian or Alaska Native          | 98            | 0.3%       | 0.724   | 0.003 |
| 2     |        |                                           | 103           | 0.3%       |         |       |
| 1     | UNK    | Unknown Race                              | 4,259         | 13.2%      | 0.344   | 0.007 |
| 2     |        |                                           | 4,178         | 12.9%      |         |       |
| 1     | F      | Female                                    | 17,213        | 53.3%      | 0.008   | 0.021 |
| 2     |        |                                           | 17,550        | 54.4%      |         |       |
| 1     | 2076-8 | Native Hawaiian or Other Pacific Islander | 172           | 0.5%       | 0.702   | 0.003 |
| 2     |        |                                           | 165           | 0.5%       |         |       |
| 1     | UN     | Unknown Gender                            | 1,659         | 5.1%       | 0.657   | 0.003 |
| 2     |        |                                           | 1,684         | 5.2%       |         |       |
| 1     | 2186-5 | Not Hispanic or Latino                    | 22,225        | 68.9%      | <0.00   | 0.029 |
| 2     |        |                                           | 22,662        | 70.2%      | 1       |       |

|   |        |                           |        |       |       |       |
|---|--------|---------------------------|--------|-------|-------|-------|
| 1 | 2135-2 | Hispanic or Latino        | 2,654  | 8.2%  | 0.007 | 0.021 |
| 2 |        |                           | 2,468  | 7.6%  |       |       |
| 1 | 2054-5 | Black or African American | 5,092  | 15.8% | 0.017 | 0.019 |
| 2 |        |                           | 4,873  | 15.1% |       |       |
| 1 | M      | Male                      | 13,396 | 41.5% | 0.004 | 0.023 |
| 2 |        |                           | 13,034 | 40.4% |       |       |
| 1 | 2028-9 | Asian                     | 681    | 2.1%  | 0.005 | 0.022 |
| 2 |        |                           | 582    | 1.8%  |       |       |

### Diagnosis

| Group |        |                                                                                               | Mean ± SD | Patients | % of Group | P-Value | SMD   |
|-------|--------|-----------------------------------------------------------------------------------------------|-----------|----------|------------|---------|-------|
| 1     | Z55-   | Persons with potential health hazards related to socioeconomic and psychosocial circumstances |           | 419      | 1.3%       | 0.001   | 0.026 |
| 2     | Z65    |                                                                                               |           | 328      | 1.0%       |         |       |
| 1     | E66    | Overweight and obesity                                                                        |           | 11,344   | 35.2%      | 0.433   | 0.006 |
| 2     |        |                                                                                               |           | 11,249   | 34.9%      |         |       |
| 1     | Z68.3  | Body mass index [BMI] 30-39, adult                                                            |           | 3,252    | 10.1%      | 0.144   | 0.012 |
| 2     |        |                                                                                               |           | 3,141    | 9.7%       |         |       |
| 1     | Z68.4  | Body mass index [BMI] 40 or greater, adult                                                    |           | 2,970    | 9.2%       | 0.099   | 0.013 |
| 2     |        |                                                                                               |           | 2,850    | 8.8%       |         |       |
| 1     | Z68.25 | Body mass index [BMI] 25.0-25.9, adult                                                        |           | 119      | 0.4%       | 0.116   | 0.012 |
| 2     |        |                                                                                               |           | 96       | 0.3%       |         |       |
| 1     | Z68.26 | Body mass index [BMI] 26.0-26.9, adult                                                        |           | 150      | 0.5%       | 0.011   | 0.020 |
| 2     |        |                                                                                               |           | 109      | 0.3%       |         |       |
| 1     | Z68.27 | Body mass index [BMI] 27.0-27.9, adult                                                        |           | 209      | 0.6%       | 0.127   | 0.012 |
| 2     |        |                                                                                               |           | 179      | 0.6%       |         |       |
| 1     | Z68.28 | Body mass index [BMI] 28.0-28.9, adult                                                        |           | 263      | 0.8%       | 0.076   | 0.014 |
| 2     |        |                                                                                               |           | 224      | 0.7%       |         |       |
| 1     | Z68.29 | Body mass index [BMI] 29.0-29.9, adult                                                        |           | 299      | 0.9%       | 0.036   | 0.017 |
| 2     |        |                                                                                               |           | 250      | 0.8%       |         |       |
| 1     | F10    | Alcohol related disorders                                                                     |           | 459      | 1.4%       | <0.001  | 0.030 |
| 2     |        |                                                                                               |           | 352      | 1.1%       |         |       |

|   |        |                                                                               |       |       |        |        |
|---|--------|-------------------------------------------------------------------------------|-------|-------|--------|--------|
| 1 | Z80    | Family history of primary malignant neoplasm                                  | 1,210 | 3.7%  | 0.011  | 0.020  |
| 2 |        |                                                                               | 1,090 | 3.4%  |        |        |
| 1 | Z15.0  | Genetic susceptibility to malignant neoplasm                                  | 18    | 0.1%  | 1      | <0.001 |
| 2 |        |                                                                               | 18    | 0.1%  |        |        |
| 1 | Z12    | Encounter for screening for malignant neoplasms                               | 6,175 | 19.1% | <0.001 | 0.048  |
| 2 |        |                                                                               | 5,575 | 17.3% |        |        |
| 1 | Z85    | Personal history of malignant neoplasm                                        | 1,105 | 3.4%  | 0.237  | 0.009  |
| 2 |        |                                                                               | 1,051 | 3.3%  |        |        |
| 1 | Z98.84 | Bariatric surgery status                                                      | 519   | 1.6%  | 0.755  | 0.002  |
| 2 |        |                                                                               | 529   | 1.6%  |        |        |
| 1 | F17    | Nicotine dependence                                                           | 2,392 | 7.4%  | <0.001 | 0.031  |
| 2 |        |                                                                               | 2,137 | 6.6%  |        |        |
| 1 | E66.0  | Obesity due to excess calories                                                | 5,850 | 18.1% | 0.690  | 0.003  |
| 2 |        |                                                                               | 5,811 | 18.0% |        |        |
| 1 | E66.2  | Morbid (severe) obesity with alveolar hypoventilation                         | 228   | 0.7%  | 0.208  | 0.010  |
| 2 |        |                                                                               | 202   | 0.6%  |        |        |
| 1 | E66.3  | Overweight                                                                    | 531   | 1.6%  | 0.041  | 0.016  |
| 2 |        |                                                                               | 467   | 1.4%  |        |        |
| 1 | E66.8  | Other obesity                                                                 | 190   | 0.6%  | 0.400  | 0.007  |
| 2 |        |                                                                               | 174   | 0.5%  |        |        |
| 1 | E66.9  | Obesity, unspecified                                                          | 8,103 | 25.1% | 0.555  | 0.005  |
| 2 |        |                                                                               | 8,038 | 24.9% |        |        |
| 1 | Z72.0  | Tobacco use                                                                   | 585   | 1.8%  | 0.004  | 0.023  |
| 2 |        |                                                                               | 491   | 1.5%  |        |        |
| 1 | Z85.09 | Personal history of malignant neoplasm of other digestive organs              | 10    | 0.0%  | 1      | <0.001 |
| 2 |        |                                                                               | 10    | 0.0%  |        |        |
| 1 | B96.8  | Helicobacter pylori [H. pylori] as the cause of diseases classified elsewhere | 141   | 0.4%  | 0.004  | 0.022  |
| 2 |        |                                                                               | 97    | 0.3%  |        |        |
| 1 | D13.1  | Benign neoplasm of stomach                                                    | 163   | 0.5%  | 0.092  | 0.013  |
| 2 |        |                                                                               | 134   | 0.4%  |        |        |
| 1 | K31.7  | Polyp of stomach and duodenum                                                 | 213   | 0.7%  | 0.175  | 0.011  |
| 2 |        |                                                                               | 186   | 0.6%  |        |        |
| 1 | D51.0  | Vitamin B12 deficiency anemia                                                 | 103   | 0.3%  | 0.216  | 0.010  |
| 2 |        |                                                                               | 86    | 0.3%  |        |        |

|                   |       |                                                          |           |          |            |         |        |
|-------------------|-------|----------------------------------------------------------|-----------|----------|------------|---------|--------|
|                   |       | due to intrinsic factor deficiency                       |           |          |            |         |        |
| 1                 | Z80.0 | Family history of malignant neoplasm of digestive organs | 409       | 1.3%     | 0.019      | 0.018   |        |
| 2                 |       |                                                          | 345       | 1.1%     |            |         |        |
| 1                 | D83   | Common variable immunodeficiency                         | 21        | 0.1%     | 0.631      | 0.004   |        |
| 2                 |       |                                                          | 18        | 0.1%     |            |         |        |
| 1                 | B27   | Infectious mononucleosis                                 | 30        | 0.1%     | 0.793      | 0.002   |        |
| 2                 |       |                                                          | 28        | 0.1%     |            |         |        |
| <b>Procedure</b>  |       |                                                          |           |          |            |         |        |
|                   | Group |                                                          | Mean ± SD | Patients | % of Group | P-Value | SMD    |
| 1                 | 10073 | Excision Procedures on the Stomach                       |           | 10       | 0.0%       | 1       | <0.001 |
| 2                 | 52    |                                                          |           | 10       | 0.0%       |         |        |
| <b>Medication</b> |       |                                                          |           |          |            |         |        |
|                   | Group |                                                          | Mean ± SD | Patients | % of Group | P-Value | SMD    |
| 1                 | A10A  | INSULINS AND ANALOGUES                                   |           | 14,042   | 43.5%      | 0.727   | 0.003  |
| 2                 |       |                                                          |           |          | 13,998     |         |        |
| 1                 | A10B  | Sulfonylureas                                            |           | 5,424    | 16.8%      | 0.120   | 0.012  |
| 2                 |       |                                                          | B         |          | 5,277      |         |        |
| 1                 | A10B  | Alpha glucosidase inhibitors                             |           | 124      | 0.4%       | 0.359   | 0.007  |
| 2                 |       |                                                          | F         |          | 110        |         |        |
| 1                 | A10B  | Thiazolidinediones                                       |           | 1,932    | 6.0%       | 0.921   | 0.001  |
| 2                 |       |                                                          | G         |          | 1,926      |         |        |
| 1                 | A10B  | Dipeptidyl peptidase 4 (DPP-4) inhibitors                |           | 3,470    | 10.8%      | 0.145   | 0.011  |
| 2                 |       |                                                          | H         |          | 3,356      |         |        |
| 1                 | A10B  | Sodium-glucose co-transporter 2 (SGLT2) inhibitors       |           | 1,751    | 5.4%       | 0.015   | 0.019  |
| 2                 |       |                                                          | K         |          | 1,614      |         |        |
| 1                 | A10B  | Other blood glucose lowering drugs, excl. insulins       |           | 660      | 2.0%       | 0.912   | 0.001  |
| 2                 |       |                                                          | X         |          | 664        |         |        |

eTable 20. Characteristics of the GLP-1RA/no metformin group and metformin/no GLP-1RA group before and after matched for covariates related to kidney cancer for the study populations of patients with T2D and no history of any OAC

| <b>Group 1 (N = 32,365) and group 2 (N = 856,160) characteristics before propensity score matching</b> |        |                                                                    |               |            |         |       |       |
|--------------------------------------------------------------------------------------------------------|--------|--------------------------------------------------------------------|---------------|------------|---------|-------|-------|
| <b>Demographics</b>                                                                                    |        |                                                                    |               |            |         |       |       |
| Group                                                                                                  |        | Mean ± SD                                                          | Patients      | % of Group | P-Value | SMD   |       |
| 1                                                                                                      | AI     | Age at Index                                                       | 59.0 +/- 12.4 | 32,365     | 100%    | <0.00 | 0.080 |
| 2                                                                                                      |        |                                                                    | 60.1 +/- 14.0 | 856,160    | 100%    | 1     |       |
| 1                                                                                                      | 2106-3 | White                                                              |               | 21,231     | 65.6%   | <0.00 | 0.111 |
| 2                                                                                                      |        |                                                                    |               | 515,868    | 60.3%   | 1     |       |
| 1                                                                                                      | 1002-5 | American Indian or Alaska Native                                   |               | 98         | 0.3%    | 0.092 | 0.010 |
| 2                                                                                                      |        |                                                                    |               | 3,080      | 0.4%    |       |       |
| 1                                                                                                      | UNK    | Unknown Race                                                       |               | 4,272      | 13.2%   | <0.00 | 0.021 |
| 2                                                                                                      |        |                                                                    |               | 119,036    | 13.9%   | 1     |       |
| 1                                                                                                      | F      | Female                                                             |               | 17,278     | 53.4%   | <0.00 | 0.134 |
| 2                                                                                                      |        |                                                                    |               | 399,923    | 46.7%   | 1     |       |
| 1                                                                                                      | 2076-8 | Native Hawaiian or Other Pacific Islander                          |               | 172        | 0.5%    | 0.001 | 0.020 |
| 2                                                                                                      |        |                                                                    |               | 5,884      | 0.7%    |       |       |
| 1                                                                                                      | UN     | Unknown Gender                                                     |               | 1,670      | 5.2%    | <0.00 | 0.152 |
| 2                                                                                                      |        |                                                                    |               | 19,592     | 2.3%    | 1     |       |
| 1                                                                                                      | 2186-5 | Not Hispanic or Latino                                             |               | 22,299     | 68.9%   | <0.00 | 0.151 |
| 2                                                                                                      |        |                                                                    |               | 528,686    | 61.8%   | 1     |       |
| 1                                                                                                      | 2135-2 | Hispanic or Latino                                                 |               | 2,660      | 8.2%    | <0.00 | 0.084 |
| 2                                                                                                      |        |                                                                    |               | 91,303     | 10.7%   | 1     |       |
| 1                                                                                                      | 2054-5 | Black or African American                                          |               | 5,107      | 15.8%   | <0.00 | 0.021 |
| 2                                                                                                      |        |                                                                    |               | 141,606    | 16.5%   | 1     |       |
| 1                                                                                                      | M      | Male                                                               |               | 13,417     | 41.5%   | <0.00 | 0.192 |
| 2                                                                                                      |        |                                                                    |               | 436,645    | 51.0%   | 1     |       |
| 1                                                                                                      | 2028-9 | Asian                                                              |               | 681        | 2.1%    | <0.00 | 0.118 |
| 2                                                                                                      |        |                                                                    |               | 35,540     | 4.2%    | 1     |       |
| <b>Diagnosis</b>                                                                                       |        |                                                                    |               |            |         |       |       |
| Group                                                                                                  |        | Mean ± SD                                                          | Patients      | % of Group | P-Value | SMD   |       |
| 1                                                                                                      | Z55-   | Persons with potential health hazards related to socioeconomic and | 422           | 1.3%       | 0.107   | 0.009 |       |
| 2                                                                                                      | Z65    |                                                                    | 10,310        | 1.2%       |         |       |       |



|   |        | psychosocial<br>circumstances                   |         |       |       |       |
|---|--------|-------------------------------------------------|---------|-------|-------|-------|
| 1 | E66    | Overweight and obesity                          | 11,418  | 35.3% | <0.00 | 0.411 |
| 2 |        |                                                 | 149,974 | 17.5% | 1     |       |
| 1 | Z68.3  | Body mass index [BMI] 30-39, adult              | 3,285   | 10.1% | <0.00 | 0.249 |
| 2 |        |                                                 | 32,977  | 3.9%  | 1     |       |
| 1 | Z68.4  | Body mass index [BMI] 40 or greater, adult      | 3,012   | 9.3%  | <0.00 | 0.278 |
| 2 |        |                                                 | 23,535  | 2.7%  | 1     |       |
| 1 | Z68.25 | Body mass index [BMI] 25.0-25.9, adult          | 119     | 0.4%  | 0.001 | 0.018 |
| 2 |        |                                                 | 2,293   | 0.3%  |       |       |
| 1 | Z68.26 | Body mass index [BMI] 26.0-26.9, adult          | 150     | 0.5%  | <0.00 | 0.029 |
| 2 |        |                                                 | 2,433   | 0.3%  | 1     |       |
| 1 | Z68.27 | Body mass index [BMI] 27.0-27.9, adult          | 209     | 0.6%  | <0.00 | 0.043 |
| 2 |        |                                                 | 2,942   | 0.3%  | 1     |       |
| 1 | Z68.28 | Body mass index [BMI] 28.0-28.9, adult          | 264     | 0.8%  | <0.00 | 0.055 |
| 2 |        |                                                 | 3,317   | 0.4%  | 1     |       |
| 1 | Z68.29 | Body mass index [BMI] 29.0-29.9, adult          | 299     | 0.9%  | <0.00 | 0.059 |
| 2 |        |                                                 | 3,753   | 0.4%  | 1     |       |
| 1 | Z80    | Family history of primary malignant neoplasm    | 1,222   | 3.8%  | <0.00 | 0.114 |
| 2 |        |                                                 | 16,133  | 1.9%  | 1     |       |
| 1 | Z15.0  | Genetic susceptibility to malignant neoplasm    | 18      | 0.1%  | <0.00 | 0.021 |
| 2 |        |                                                 | 140     | 0.0%  | 1     |       |
| 1 | Z12    | Encounter for screening for malignant neoplasms | 6,223   | 19.2% | <0.00 | 0.157 |
| 2 |        |                                                 | 114,996 | 13.4% | 1     |       |
| 1 | Z85    | Personal history of malignant neoplasm          | 1,111   | 3.4%  | <0.00 | 0.042 |
| 2 |        |                                                 | 23,231  | 2.7%  | 1     |       |
| 1 | Z98.84 | Bariatric surgery status                        | 534     | 1.6%  | <0.00 | 0.131 |
| 2 |        |                                                 | 2,989   | 0.3%  | 1     |       |
| 1 | I10    | Essential (primary) hypertension                | 19,775  | 61.1% | <0.00 | 0.259 |
| 2 |        |                                                 | 413,462 | 48.3% | 1     |       |
| 1 | F17    | Nicotine dependence                             | 2,399   | 7.4%  | <0.00 | 0.059 |
| 2 |        |                                                 | 77,335  | 9.0%  | 1     |       |

|   |             |                                                       |         |       |       |       |
|---|-------------|-------------------------------------------------------|---------|-------|-------|-------|
| 1 | E66.0       | Obesity due to excess calories                        | 5,910   | 18.3% | <0.00 | 0.361 |
| 2 |             |                                                       | 56,178  | 6.6%  | 1     |       |
| 1 | E66.2       | Morbid (severe) obesity with alveolar hypoventilation | 230     | 0.7%  | <0.00 | 0.069 |
| 2 |             |                                                       | 2,051   | 0.2%  | 1     |       |
| 1 | E66.3       | Overweight                                            | 535     | 1.7%  | <0.00 | 0.066 |
| 2 |             |                                                       | 7,794   | 0.9%  | 1     |       |
| 1 | E66.8       | Other obesity                                         | 193     | 0.6%  | <0.00 | 0.078 |
| 2 |             |                                                       | 1,084   | 0.1%  | 1     |       |
| 1 | E66.9       | Obesity, unspecified                                  | 8,150   | 25.2% | <0.00 | 0.307 |
| 2 |             |                                                       | 113,380 | 13.2% | 1     |       |
| 1 | Z72.0       | Tobacco use                                           | 588     | 1.8%  | <0.00 | 0.034 |
| 2 |             |                                                       | 11,927  | 1.4%  | 1     |       |
| 1 | Z80.51      | Family history of malignant neoplasm of kidney        | 12      | 0.0%  | 0.002 | 0.014 |
| 2 |             |                                                       | 129     | 0.0%  |       |       |
| 1 | N18         | Chronic kidney disease (CKD)                          | 6,496   | 20.1% | <0.00 | 0.504 |
| 2 |             |                                                       | 35,429  | 4.1%  | 1     |       |
| 1 | N19         | Unspecified kidney failure                            | 530     | 1.6%  | <0.00 | 0.133 |
| 2 |             |                                                       | 2,836   | 0.3%  | 1     |       |
| 1 | Z99.2       | Dependence on renal dialysis                          | 548     | 1.7%  | <0.00 | 0.167 |
| 2 |             |                                                       | 979     | 0.1%  | 1     |       |
| 1 | N17-<br>N19 | Acute kidney failure and chronic kidney disease       | 7,323   | 22.6% | <0.00 | 0.466 |
| 2 |             |                                                       | 56,470  | 6.6%  | 1     |       |
| 1 | Q85.8<br>3  | Von Hippel-Lindau syndrome                            | 0       | 0%    | 0.539 | 0.005 |
| 2 |             |                                                       | 10      | 0.0%  |       |       |
| 1 | Q85.1       | Tuberous sclerosis                                    | 0       | 0%    | 0.237 | 0.009 |
| 2 |             |                                                       | 37      | 0.0%  |       |       |
| 1 | D57.1       | Sickle-cell disease without crisis                    | 10      | 0.0%  | 0.783 | 0.002 |
| 2 |             |                                                       | 289     | 0.0%  |       |       |
| 1 | D30.0       | Benign neoplasm of kidney                             | 33      | 0.1%  | <0.00 | 0.026 |
| 2 |             |                                                       | 301     | 0.0%  | 1     |       |

### Medication

| Group | Mean ± SD              | Patients | % of Group | P-Value | SMD   |
|-------|------------------------|----------|------------|---------|-------|
| 1     | INSULINS AND ANALOGUES | 14,131   | 43.7%      | <0.00   | 0.560 |
| 2     |                        | 159,901  | 18.7%      | 1       |       |
| 1     | A10B<br>B              | 5,464    | 16.9%      | <0.00   | 0.269 |
| 2     |                        | 69,045   | 8.1%       | 1       |       |

|   |      |                                                    |         |       |        |       |
|---|------|----------------------------------------------------|---------|-------|--------|-------|
| 1 | A10B | Alpha glucosidase inhibitors                       | 124     | 0.4%  | <0.001 | 0.057 |
| 2 | F    |                                                    | 876     | 0.1%  |        |       |
| 1 | A10B | Thiazolidinediones                                 | 1,960   | 6.1%  | <0.001 | 0.183 |
| 2 | G    |                                                    | 20,400  | 2.4%  |        |       |
| 1 | A10B | Dipeptidyl peptidase 4 (DPP-4) inhibitors          | 3,547   | 11.0% | <0.001 | 0.370 |
| 2 | H    |                                                    | 17,113  | 2.0%  |        |       |
| 1 | A10B | Sodium-glucose co-transporter 2 (SGLT2) inhibitors | 1,839   | 5.7%  | <0.001 | 0.312 |
| 2 | K    |                                                    | 3,371   | 0.4%  |        |       |
| 1 | A10B | Other blood glucose lowering drugs, excl. insulins | 672     | 2.1%  | <0.001 | 0.146 |
| 2 | X    |                                                    | 3,839   | 0.4%  |        |       |
| 1 | 161  | acetaminophen                                      | 10,835  | 33.5% | <0.001 | 0.123 |
| 2 |      |                                                    | 238,323 | 27.8% |        |       |

**Group 1 (N = 32,162) and group 2 (N = 32,162) characteristics after propensity score matching**

**Demographics**

| Group  | Mean ± SD | Patients                                  | % of Group                     | P-Value          | SMD            |                 |
|--------|-----------|-------------------------------------------|--------------------------------|------------------|----------------|-----------------|
| 1<br>2 | AI        | Age at Index                              | 59.0 +/- 12.4<br>59.0 +/- 13.7 | 32,162<br>32,162 | 100%<br>100%   | 0.912<br>0.001  |
| 1<br>2 | 2106-3    | White                                     |                                | 21,094<br>21,683 | 65.6%<br>67.4% | <0.001<br>0.039 |
| 1<br>2 | 1002-5    | American Indian or Alaska Native          |                                | 98<br>102        | 0.3%<br>0.3%   | 0.777<br>0.002  |
| 1<br>2 | UNK       | Unknown Race                              |                                | 4,244<br>4,043   | 13.2%<br>12.6% | 0.018<br>0.019  |
| 1<br>2 | F         | Female                                    |                                | 17,170<br>17,352 | 53.4%<br>54.0% | 0.150<br>0.011  |
| 1<br>2 | 2076-8    | Native Hawaiian or Other Pacific Islander |                                | 172<br>153       | 0.5%<br>0.5%   | 0.291<br>0.008  |
| 1<br>2 | UN        | Unknown Gender                            |                                | 1,648<br>1,693   | 5.1%<br>5.3%   | 0.424<br>0.006  |
| 1<br>2 | 2186-5    | Not Hispanic or Latino                    |                                | 22,153<br>22,767 | 68.9%<br>70.8% | <0.001<br>0.042 |
| 1<br>2 | 2135-2    | Hispanic or Latino                        |                                | 2,642<br>2,283   | 8.2%<br>7.1%   | <0.001<br>0.042 |
| 1<br>2 | 2054-5    | Black or African American                 |                                | 5,076<br>4,856   | 15.8%<br>15.1% | 0.016<br>0.019  |

|                  |        |                                                                                               |           |          |            |         |       |
|------------------|--------|-----------------------------------------------------------------------------------------------|-----------|----------|------------|---------|-------|
| 1                |        |                                                                                               |           | 13,344   | 41.5%      |         |       |
| 2                | M      | Male                                                                                          |           | 13,117   | 40.8%      | 0.069   | 0.014 |
| 1                |        |                                                                                               |           | 677      | 2.1%       |         |       |
| 2                | 2028-9 | Asian                                                                                         |           | 581      | 1.8%       | 0.006   | 0.022 |
| <b>Diagnosis</b> |        |                                                                                               |           |          |            |         |       |
| Group            |        |                                                                                               | Mean ± SD | Patients | % of Group | P-Value | SMD   |
| 1                | Z55-   | Persons with potential health hazards related to socioeconomic and psychosocial circumstances |           | 417      | 1.3%       | 0.092   | 0.013 |
| 2                | Z65    |                                                                                               |           | 370      | 1.2%       |         |       |
| 1                | E66    | Overweight and obesity                                                                        |           | 11,266   | 35.0%      | 0.293   | 0.008 |
| 2                |        |                                                                                               |           | 11,139   | 34.6%      |         |       |
| 1                | Z68.3  | Body mass index [BMI] 30-39, adult                                                            |           | 3,223    | 10.0%      | 0.399   | 0.007 |
| 2                |        |                                                                                               |           | 3,159    | 9.8%       |         |       |
| 1                | Z68.4  | Body mass index [BMI] 40 or greater, adult                                                    |           | 2,929    | 9.1%       | 0.690   | 0.003 |
| 2                |        |                                                                                               |           | 2,900    | 9.0%       |         |       |
| 1                | Z68.25 | Body mass index [BMI] 25.0-25.9, adult                                                        |           | 118      | 0.4%       | 0.132   | 0.012 |
| 2                |        |                                                                                               |           | 96       | 0.3%       |         |       |
| 1                | Z68.26 | Body mass index [BMI] 26.0-26.9, adult                                                        |           | 148      | 0.5%       | 0.099   | 0.013 |
| 2                |        |                                                                                               |           | 121      | 0.4%       |         |       |
| 1                | Z68.27 | Body mass index [BMI] 27.0-27.9, adult                                                        |           | 207      | 0.6%       | 0.012   | 0.020 |
| 2                |        |                                                                                               |           | 159      | 0.5%       |         |       |
| 1                | Z68.28 | Body mass index [BMI] 28.0-28.9, adult                                                        |           | 259      | 0.8%       | 0.656   | 0.004 |
| 2                |        |                                                                                               |           | 249      | 0.8%       |         |       |
| 1                | Z68.29 | Body mass index [BMI] 29.0-29.9, adult                                                        |           | 296      | 0.9%       | 0.587   | 0.004 |
| 2                |        |                                                                                               |           | 283      | 0.9%       |         |       |
| 1                | Z80    | Family history of primary malignant neoplasm                                                  |           | 1,195    | 3.7%       | 0.213   | 0.010 |
| 2                |        |                                                                                               |           | 1,136    | 3.5%       |         |       |
| 1                | Z15.0  | Genetic susceptibility to malignant neoplasm                                                  |           | 18       | 0.1%       | 0.369   | 0.007 |
| 2                |        |                                                                                               |           | 13       | 0.0%       |         |       |

|   |         |                                                       |        |       |        |       |
|---|---------|-------------------------------------------------------|--------|-------|--------|-------|
| 1 | Z12     | Encounter for screening for malignant neoplasms       | 6,128  | 19.1% | <0.001 | 0.048 |
| 2 |         |                                                       | 5,534  | 17.2% |        |       |
| 1 | Z85     | Personal history of malignant neoplasm                | 1,096  | 3.4%  | 0.039  | 0.016 |
| 2 |         |                                                       | 1,003  | 3.1%  |        |       |
| 1 | Z98.84  | Bariatric surgery status                              | 510    | 1.6%  | 0.899  | 0.001 |
| 2 |         |                                                       | 506    | 1.6%  |        |       |
| 1 | I10     | Essential (primary) hypertension                      | 19,593 | 60.9% | <0.001 | 0.033 |
| 2 |         |                                                       | 19,079 | 59.3% |        |       |
| 1 | F17     | Nicotine dependence                                   | 2,384  | 7.4%  | <0.001 | 0.033 |
| 2 |         |                                                       | 2,112  | 6.6%  |        |       |
| 1 | E66.0   | Obesity due to excess calories                        | 5,798  | 18.0% | 0.712  | 0.003 |
| 2 |         |                                                       | 5,762  | 17.9% |        |       |
| 1 | E66.2   | Morbid (severe) obesity with alveolar hypoventilation | 226    | 0.7%  | 0.068  | 0.014 |
| 2 |         |                                                       | 189    | 0.6%  |        |       |
| 1 | E66.3   | Overweight                                            | 529    | 1.6%  | 0.105  | 0.013 |
| 2 |         |                                                       | 478    | 1.5%  |        |       |
| 1 | E66.8   | Other obesity                                         | 190    | 0.6%  | 0.290  | 0.008 |
| 2 |         |                                                       | 170    | 0.5%  |        |       |
| 1 | E66.9   | Obesity, unspecified                                  | 8,037  | 25.0% | 0.333  | 0.008 |
| 2 |         |                                                       | 7,931  | 24.7% |        |       |
| 1 | Z72.0   | Tobacco use                                           | 579    | 1.8%  | 0.028  | 0.017 |
| 2 |         |                                                       | 507    | 1.6%  |        |       |
| 1 | Z80.51  | Family history of malignant neoplasm of kidney        | 12     | 0.0%  | 0.670  | 0.003 |
| 2 |         |                                                       | 10     | 0.0%  |        |       |
| 1 | N18     | Chronic kidney disease (CKD)                          | 6,366  | 19.8% | 0.649  | 0.004 |
| 2 |         |                                                       | 6,320  | 19.7% |        |       |
| 1 | N19     | Unspecified kidney failure                            | 510    | 1.6%  | 0.567  | 0.005 |
| 2 |         |                                                       | 492    | 1.5%  |        |       |
| 1 | Z99.2   | Dependence on renal dialysis                          | 514    | 1.6%  | 0.236  | 0.009 |
| 2 |         |                                                       | 477    | 1.5%  |        |       |
| 1 | N17-N19 | Acute kidney failure and chronic kidney disease       | 7,189  | 22.4% | 0.426  | 0.006 |
| 2 |         |                                                       | 7,105  | 22.1% |        |       |
| 1 | Q85.8   | Von Hippel-Lindau syndrome                            | 0      | 0%    | --     | --    |
| 2 |         |                                                       | 0      | 0%    |        |       |
| 1 | Q85.1   | Tuberous sclerosis                                    | 0      | 0%    | --     | --    |
| 2 |         |                                                       | 0      | 0%    |        |       |
| 1 | D57.1   | Sickle-cell disease without crisis                    | 10     | 0.0%  | 0.827  | 0.002 |
| 2 |         |                                                       | 11     | 0.0%  |        |       |

|                   |       |                                                    |           |          |            |         |       |
|-------------------|-------|----------------------------------------------------|-----------|----------|------------|---------|-------|
| 1                 | D30.0 | Benign neoplasm of kidney                          |           | 33       | 0.1%       |         |       |
| 2                 |       |                                                    |           | 21       | 0.1%       | 0.102   | 0.013 |
| <b>Medication</b> |       |                                                    |           |          |            |         |       |
|                   | Group |                                                    | Mean ± SD | Patients | % of Group | P-Value | SMD   |
| 1                 | A10A  | INSULINS AND ANALOGUES                             |           | 13,947   | 43.4%      |         |       |
| 2                 |       |                                                    |           | 13,899   | 43.2%      | 0.702   | 0.003 |
| 1                 | A10B  | Sulfonylureas                                      |           | 5,373    | 16.7%      |         |       |
| 2                 | B     |                                                    |           | 5,299    | 16.5%      | 0.433   | 0.006 |
| 1                 | A10B  | Alpha glucosidase inhibitors                       |           | 120      | 0.4%       |         |       |
| 2                 | F     |                                                    |           | 100      | 0.3%       | 0.177   | 0.011 |
| 1                 | A10B  | Thiazolidinediones                                 |           | 1,907    | 5.9%       |         |       |
| 2                 | G     |                                                    |           | 1,800    | 5.6%       | 0.070   | 0.014 |
| 1                 | A10B  | Dipeptidyl peptidase 4 (DPP-4) inhibitors          |           | 3,406    | 10.6%      |         |       |
| 2                 | H     |                                                    |           | 3,241    | 10.1%      | 0.033   | 0.017 |
| 1                 | A10B  | Sodium-glucose co-transporter 2 (SGLT2) inhibitors |           | 1,696    | 5.3%       |         |       |
| 2                 | K     |                                                    |           | 1,560    | 4.9%       | 0.014   | 0.019 |
| 1                 | A10B  | Other blood glucose lowering drugs, excl. insulins |           | 650      | 2.0%       |         |       |
| 2                 | X     |                                                    |           | 569      | 1.8%       | 0.019   | 0.018 |
| 1                 | 161   | acetaminophen                                      |           | 10,744   | 33.4%      |         |       |
| 2                 |       |                                                    |           | 10,591   | 32.9%      | 0.200   | 0.010 |

eTable 21. Characteristics of the GLP-1RA/no metformin group and metformin/no GLP-1RA group before and after matched for covariates related to liver cancer for the study populations of patients with T2D and no history of any OAC

**Group 1 (N = 32,365) and group 2 (N = 856,160) characteristics before propensity score matching**

| <b>Demographics</b> |        |                                                                    |               |            |         |       |       |
|---------------------|--------|--------------------------------------------------------------------|---------------|------------|---------|-------|-------|
| Group               |        | Mean ± SD                                                          | Patients      | % of Group | P-Value | SMD   |       |
| 1                   | AI     | Age at Index                                                       | 59.0 +/- 12.4 | 32,365     | 100%    | <0.00 | 0.080 |
| 2                   |        |                                                                    | 60.1 +/- 14.0 | 856,160    | 100%    | 1     |       |
| 1                   | 2106-3 | White                                                              |               | 21,231     | 65.6%   | <0.00 | 0.111 |
| 2                   |        |                                                                    |               | 515,868    | 60.3%   | 1     |       |
| 1                   | 1002-5 | American Indian or Alaska Native                                   |               | 98         | 0.3%    | 0.092 | 0.010 |
| 2                   |        |                                                                    |               | 3,080      | 0.4%    |       |       |
| 1                   | UNK    | Unknown Race                                                       |               | 4,272      | 13.2%   | <0.00 | 0.021 |
| 2                   |        |                                                                    |               | 119,036    | 13.9%   | 1     |       |
| 1                   | F      | Female                                                             |               | 17,278     | 53.4%   | <0.00 | 0.134 |
| 2                   |        |                                                                    |               | 399,923    | 46.7%   | 1     |       |
| 1                   | 2076-8 | Native Hawaiian or Other Pacific Islander                          |               | 172        | 0.5%    | 0.001 | 0.020 |
| 2                   |        |                                                                    |               | 5,884      | 0.7%    |       |       |
| 1                   | UN     | Unknown Gender                                                     |               | 1,670      | 5.2%    | <0.00 | 0.152 |
| 2                   |        |                                                                    |               | 19,592     | 2.3%    | 1     |       |
| 1                   | 2186-5 | Not Hispanic or Latino                                             |               | 22,299     | 68.9%   | <0.00 | 0.151 |
| 2                   |        |                                                                    |               | 528,686    | 61.8%   | 1     |       |
| 1                   | 2135-2 | Hispanic or Latino                                                 |               | 2,660      | 8.2%    | <0.00 | 0.084 |
| 2                   |        |                                                                    |               | 91,303     | 10.7%   | 1     |       |
| 1                   | 2054-5 | Black or African American                                          |               | 5,107      | 15.8%   | <0.00 | 0.021 |
| 2                   |        |                                                                    |               | 141,606    | 16.5%   | 1     |       |
| 1                   | M      | Male                                                               |               | 13,417     | 41.5%   | <0.00 | 0.192 |
| 2                   |        |                                                                    |               | 436,645    | 51.0%   | 1     |       |
| 1                   | 2028-9 | Asian                                                              |               | 681        | 2.1%    | <0.00 | 0.118 |
| 2                   |        |                                                                    |               | 35,540     | 4.2%    | 1     |       |
| <b>Diagnosis</b>    |        |                                                                    |               |            |         |       |       |
| Group               |        | Mean ± SD                                                          | Patients      | % of Group | P-Value | SMD   |       |
| 1                   | Z55-   | Persons with potential health hazards related to socioeconomic and | 422           | 1.3%       | 0.107   | 0.009 |       |
| 2                   | Z65    |                                                                    | 10,310        | 1.2%       |         |       |       |

|   |        | psychosocial<br>circumstances                         |         |       |       |       |
|---|--------|-------------------------------------------------------|---------|-------|-------|-------|
| 1 | E66    | Overweight and<br>obesity                             | 11,418  | 35.3% | <0.00 | 0.411 |
| 2 |        |                                                       | 149,974 | 17.5% | 1     |       |
| 1 | Z68.3  | Body mass index<br>[BMI] 30-39, adult                 | 3,285   | 10.1% | <0.00 | 0.249 |
| 2 |        |                                                       | 32,977  | 3.9%  | 1     |       |
| 1 | Z68.4  | Body mass index<br>[BMI] 40 or greater,<br>adult      | 3,012   | 9.3%  | <0.00 | 0.278 |
| 2 |        |                                                       | 23,535  | 2.7%  | 1     |       |
| 1 | Z68.25 | Body mass index<br>[BMI] 25.0-25.9,<br>adult          | 119     | 0.4%  | 0.001 | 0.018 |
| 2 |        |                                                       | 2,293   | 0.3%  |       |       |
| 1 | Z68.26 | Body mass index<br>[BMI] 26.0-26.9,<br>adult          | 150     | 0.5%  | <0.00 | 0.029 |
| 2 |        |                                                       | 2,433   | 0.3%  | 1     |       |
| 1 | Z68.27 | Body mass index<br>[BMI] 27.0-27.9,<br>adult          | 209     | 0.6%  | <0.00 | 0.043 |
| 2 |        |                                                       | 2,942   | 0.3%  | 1     |       |
| 1 | Z68.28 | Body mass index<br>[BMI] 28.0-28.9,<br>adult          | 264     | 0.8%  | <0.00 | 0.055 |
| 2 |        |                                                       | 3,317   | 0.4%  | 1     |       |
| 1 | Z68.29 | Body mass index<br>[BMI] 29.0-29.9,<br>adult          | 299     | 0.9%  | <0.00 | 0.059 |
| 2 |        |                                                       | 3,753   | 0.4%  | 1     |       |
| 1 | F10    | Alcohol related<br>disorders                          | 460     | 1.4%  | <0.00 | 0.076 |
| 2 |        |                                                       | 21,150  | 2.5%  | 1     |       |
| 1 | Z80    | Family history of<br>primary malignant<br>neoplasm    | 1,222   | 3.8%  | <0.00 | 0.114 |
| 2 |        |                                                       | 16,133  | 1.9%  | 1     |       |
| 1 | Z15.0  | Genetic<br>susceptibility to<br>malignant neoplasm    | 18      | 0.1%  | <0.00 | 0.021 |
| 2 |        |                                                       | 140     | 0.0%  | 1     |       |
| 1 | Z12    | Encounter for<br>screening for<br>malignant neoplasms | 6,223   | 19.2% | <0.00 | 0.157 |
| 2 |        |                                                       | 114,996 | 13.4% | 1     |       |
| 1 | Z85    | Personal history of<br>malignant neoplasm             | 1,111   | 3.4%  | <0.00 | 0.042 |
| 2 |        |                                                       | 23,231  | 2.7%  | 1     |       |
| 1 | Z98.84 | Bariatric surgery<br>status                           | 534     | 1.6%  | <0.00 | 0.131 |
| 2 |        |                                                       | 2,989   | 0.3%  | 1     |       |
| 1 | E88.81 | Metabolic syndrome<br>and other insulin<br>resistance | 705     | 2.2%  | <0.00 | 0.098 |
| 2 |        |                                                       | 8,208   | 1.0%  | 1     |       |



|   |        |                                                          |         |       |       |       |
|---|--------|----------------------------------------------------------|---------|-------|-------|-------|
| 1 | E78    | Disorders of lipoprotein metabolism and other lipidemias | 18,042  | 55.7% | <0.00 | 0.320 |
| 2 |        |                                                          | 341,946 | 39.9% | 1     |       |
| 1 | I10    | Essential (primary) hypertension                         | 19,775  | 61.1% | <0.00 | 0.259 |
| 2 |        |                                                          | 413,462 | 48.3% | 1     |       |
| 1 | K75.8  | Nonalcoholic steatohepatitis (NASH)                      | 305     | 0.9%  | <0.00 | 0.096 |
| 2 | 1      |                                                          | 1,860   | 0.2%  | 1     |       |
| 1 | F17    | Nicotine dependence                                      | 2,399   | 7.4%  | <0.00 | 0.059 |
| 2 |        |                                                          | 77,335  | 9.0%  | 1     |       |
| 1 | E66.0  | Obesity due to excess calories                           | 5,910   | 18.3% | <0.00 | 0.361 |
| 2 |        |                                                          | 56,178  | 6.6%  | 1     |       |
| 1 | E66.2  | Morbid (severe) obesity with alveolar hypoventilation    | 230     | 0.7%  | <0.00 | 0.069 |
| 2 |        |                                                          | 2,051   | 0.2%  | 1     |       |
| 1 | E66.3  | Overweight                                               | 535     | 1.7%  | <0.00 | 0.066 |
| 2 |        |                                                          | 7,794   | 0.9%  | 1     |       |
| 1 | E66.8  | Other obesity                                            | 193     | 0.6%  | <0.00 | 0.078 |
| 2 |        |                                                          | 1,084   | 0.1%  | 1     |       |
| 1 | E66.9  | Obesity, unspecified                                     | 8,150   | 25.2% | <0.00 | 0.307 |
| 2 |        |                                                          | 113,380 | 13.2% | 1     |       |
| 1 | Z72.0  | Tobacco use                                              | 588     | 1.8%  | <0.00 | 0.034 |
| 2 |        |                                                          | 11,927  | 1.4%  | 1     |       |
| 1 | Z72.3  | Lack of physical exercise                                | 20      | 0.1%  | 0.001 | 0.015 |
| 2 |        |                                                          | 251     | 0.0%  |       |       |
| 1 | Z72.4  | Inappropriate diet and eating habits                     | 43      | 0.1%  | <0.00 | 0.044 |
| 2 |        |                                                          | 118     | 0.0%  | 1     |       |
| 1 | B18    | Chronic viral hepatitis                                  | 352     | 1.1%  | 0.001 | 0.018 |
| 2 |        |                                                          | 7,813   | 0.9%  |       |       |
| 1 | K74    | Fibrosis and cirrhosis of liver                          | 681     | 2.1%  | <0.00 | 0.097 |
| 2 |        |                                                          | 7,900   | 0.9%  | 1     |       |
| 1 | K76.0  | Fatty (change of) liver, not elsewhere classified        | 1,474   | 4.6%  | <0.00 | 0.110 |
| 2 |        |                                                          | 21,684  | 2.5%  | 1     |       |
| 1 | K74.3  | Primary biliary cirrhosis                                | 28      | 0.1%  | <0.00 | 0.022 |
| 2 |        |                                                          | 287     | 0.0%  | 1     |       |
| 1 | E83.11 | Hereditary hemochromatosis                               | 24      | 0.1%  | <0.00 | 0.019 |
| 2 | 0      |                                                          | 266     | 0.0%  | 1     |       |
| 1 | E70.21 | Tyrosinemia                                              | 10      | 0.0%  | <0.00 | 0.019 |
| 2 |        |                                                          | 46      | 0.0%  | 1     |       |

|   |        |                                                                 |     |      |        |       |
|---|--------|-----------------------------------------------------------------|-----|------|--------|-------|
| 1 | E88.01 | Alpha-1-antitrypsin deficiency                                  | 15  | 0.0% | <0.001 | 0.020 |
| 2 |        |                                                                 | 104 | 0.0% |        |       |
| 1 | E80.1  | Porphyria cutanea tarda                                         | 10  | 0.0% | <0.001 | 0.022 |
| 2 |        |                                                                 | 20  | 0.0% |        |       |
| 1 | E74.0  | Glycogen storage disease                                        | 10  | 0.0% | <0.001 | 0.017 |
| 2 |        |                                                                 | 60  | 0.0% |        |       |
| 1 | E83.00 | Disorder of copper metabolism, unspecified                      | 10  | 0.0% | <0.001 | 0.017 |
| 2 |        |                                                                 | 61  | 0.0% |        |       |
| 1 | T64    | Toxic effect of aflatoxin and other mycotoxin food contaminants | 10  | 0.0% | 0.031  | 0.010 |
| 2 |        |                                                                 | 132 | 0.0% |        |       |
| 1 | D13.4  | Benign neoplasm of liver                                        | 16  | 0.0% | 0.199  | 0.007 |
| 2 |        |                                                                 | 305 | 0.0% |        |       |

### Medication

| Group |      | Mean ± SD                                          | Patients | % of Group | P-Value | SMD   |
|-------|------|----------------------------------------------------|----------|------------|---------|-------|
| 1     | A10A | INSULINS AND ANALOGUES                             | 14,131   | 43.7%      | <0.001  | 0.560 |
| 2     |      |                                                    | 159,901  | 18.7%      |         |       |
| 1     | A10B | Sulfonylureas                                      | 5,464    | 16.9%      | <0.001  | 0.269 |
| 2     |      |                                                    | B        | 69,045     |         |       |
| 1     | A10B | Alpha glucosidase inhibitors                       | 124      | 0.4%       | <0.001  | 0.057 |
| 2     |      |                                                    | F        | 876        |         |       |
| 1     | A10B | Thiazolidinediones                                 | 1,960    | 6.1%       | <0.001  | 0.183 |
| 2     |      |                                                    | G        | 20,400     |         |       |
| 1     | A10B | Dipeptidyl peptidase 4 (DPP-4) inhibitors          | 3,547    | 11.0%      | <0.001  | 0.370 |
| 2     |      |                                                    | H        | 17,113     |         |       |
| 1     | A10B | Sodium-glucose co-transporter 2 (SGLT2) inhibitors | 1,839    | 5.7%       | <0.001  | 0.312 |
| 2     |      |                                                    | K        | 3,371      |         |       |
| 1     | A10B | Other blood glucose lowering drugs, excl. insulins | 672      | 2.1%       | <0.001  | 0.146 |
| 2     |      |                                                    | X        | 3,839      |         |       |
| 1     | A14A | ANABOLIC STEROIDS                                  | 17       | 0.1%       | 0.629   | 0.003 |
| 2     |      |                                                    | 399      | 0.0%       |         |       |

### Group 1 (N = 32,267) and group 2 (N = 32,267) characteristics after propensity score matching

#### Demographics

| Group |  | Mean ± SD | Patients | % of Group | P-Value | SMD |
|-------|--|-----------|----------|------------|---------|-----|
|-------|--|-----------|----------|------------|---------|-----|

|   |        |                                           |               |        |       |       |        |
|---|--------|-------------------------------------------|---------------|--------|-------|-------|--------|
| 1 | AI     | Age at Index                              | 59.0 +/- 12.4 | 32,267 | 100%  | 0.088 | 0.013  |
| 2 |        |                                           | 58.8 +/- 13.4 | 32,267 | 100%  |       |        |
| 1 | 2106-3 | White                                     |               | 21,161 | 65.6% | <0.00 | 0.035  |
| 2 |        |                                           |               | 21,688 | 67.2% | 1     |        |
| 1 | 1002-5 | American Indian or Alaska Native          |               | 98     | 0.3%  | 0.887 | 0.001  |
| 2 |        |                                           |               | 100    | 0.3%  |       |        |
| 1 | UNK    | Unknown Race                              |               | 4,256  | 13.2% | 0.211 | 0.010  |
| 2 |        |                                           |               | 4,149  | 12.9% |       |        |
| 1 | F      | Female                                    |               | 17,218 | 53.4% | 0.240 | 0.009  |
| 2 |        |                                           |               | 17,367 | 53.8% |       |        |
| 1 | 2076-8 | Native Hawaiian or Other Pacific Islander |               | 172    | 0.5%  | 0.957 | <0.001 |
| 2 |        |                                           |               | 173    | 0.5%  |       |        |
| 1 | UN     | Unknown Gender                            |               | 1,658  | 5.1%  | 0.098 | 0.013  |
| 2 |        |                                           |               | 1,752  | 5.4%  |       |        |
| 1 | 2186-5 | Not Hispanic or Latino                    |               | 22,227 | 68.9% | <0.00 | 0.032  |
| 2 |        |                                           |               | 22,704 | 70.4% | 1     |        |
| 1 | 2135-2 | Hispanic or Latino                        |               | 2,652  | 8.2%  | 0.002 | 0.025  |
| 2 |        |                                           |               | 2,438  | 7.6%  |       |        |
| 1 | 2054-5 | Black or African American                 |               | 5,095  | 15.8% | 0.003 | 0.023  |
| 2 |        |                                           |               | 4,824  | 15.0% |       |        |
| 1 | M      | Male                                      |               | 13,391 | 41.5% | 0.052 | 0.015  |
| 2 |        |                                           |               | 13,148 | 40.7% |       |        |
| 1 | 2028-9 | Asian                                     |               | 681    | 2.1%  | 0.008 | 0.021  |
| 2 |        |                                           |               | 588    | 1.8%  |       |        |

### Diagnosis

| Group       | Mean ± SD                                                                                     | Patients | % of Group | P-Value | SMD   |
|-------------|-----------------------------------------------------------------------------------------------|----------|------------|---------|-------|
| 1 Z55-2 Z65 | Persons with potential health hazards related to socioeconomic and psychosocial circumstances | 417      | 1.3%       | 0.025   | 0.018 |
| 2           |                                                                                               | 355      | 1.1%       |         |       |
| 1 E66       | Overweight and obesity                                                                        | 11,344   | 35.2%      | 0.504   | 0.005 |
| 2           |                                                                                               | 11,263   | 34.9%      |         |       |
| 1 Z68.3     | Body mass index [BMI] 30-39, adult                                                            | 3,251    | 10.1%      | 0.804   | 0.002 |
| 2           |                                                                                               | 3,270    | 10.1%      |         |       |
| 1 Z68.4     | Body mass index [BMI] 40 or greater, adult                                                    | 2,968    | 9.2%       | 0.108   | 0.013 |
| 2           |                                                                                               | 2,851    | 8.8%       |         |       |

|   |        |                                                          |        |       |        |        |
|---|--------|----------------------------------------------------------|--------|-------|--------|--------|
| 1 | Z68.25 | Body mass index [BMI] 25.0-25.9, adult                   | 118    | 0.4%  | 0.043  | 0.016  |
| 2 |        |                                                          | 89     | 0.3%  |        |        |
| 1 | Z68.26 | Body mass index [BMI] 26.0-26.9, adult                   | 149    | 0.5%  | 0.057  | 0.015  |
| 2 |        |                                                          | 118    | 0.4%  |        |        |
| 1 | Z68.27 | Body mass index [BMI] 27.0-27.9, adult                   | 208    | 0.6%  | 0.064  | 0.015  |
| 2 |        |                                                          | 172    | 0.5%  |        |        |
| 1 | Z68.28 | Body mass index [BMI] 28.0-28.9, adult                   | 262    | 0.8%  | 0.175  | 0.011  |
| 2 |        |                                                          | 232    | 0.7%  |        |        |
| 1 | Z68.29 | Body mass index [BMI] 29.0-29.9, adult                   | 298    | 0.9%  | 0.804  | 0.002  |
| 2 |        |                                                          | 292    | 0.9%  |        |        |
| 1 | F10    | Alcohol related disorders                                | 460    | 1.4%  | <0.001 | 0.033  |
| 2 |        |                                                          | 343    | 1.1%  |        |        |
| 1 | Z80    | Family history of primary malignant neoplasm             | 1,207  | 3.7%  | 0.012  | 0.020  |
| 2 |        |                                                          | 1,089  | 3.4%  |        |        |
| 1 | Z15.0  | Genetic susceptibility to malignant neoplasm             | 18     | 0.1%  | 0.369  | 0.007  |
| 2 |        |                                                          | 13     | 0.0%  |        |        |
| 1 | Z12    | Encounter for screening for malignant neoplasms          | 6,179  | 19.1% | <0.001 | 0.055  |
| 2 |        |                                                          | 5,497  | 17.0% |        |        |
| 1 | Z85    | Personal history of malignant neoplasm                   | 1,106  | 3.4%  | 0.011  | 0.020  |
| 2 |        |                                                          | 992    | 3.1%  |        |        |
| 1 | Z98.84 | Bariatric surgery status                                 | 519    | 1.6%  | 0.950  | <0.001 |
| 2 |        |                                                          | 521    | 1.6%  |        |        |
| 1 | E88.81 | Metabolic syndrome and other insulin resistance          | 695    | 2.2%  | 0.048  | 0.016  |
| 2 |        |                                                          | 624    | 1.9%  |        |        |
| 1 | E78    | Disorders of lipoprotein metabolism and other lipidemias | 17,957 | 55.7% | <0.001 | 0.032  |
| 2 |        |                                                          | 17,449 | 54.1% |        |        |
| 1 | I10    | Essential (primary) hypertension                         | 19,692 | 61.0% | <0.001 | 0.036  |
| 2 |        |                                                          | 19,128 | 59.3% |        |        |
| 1 | K75.81 | Nonalcoholic steatohepatitis (NASH)                      | 293    | 0.9%  | 0.622  | 0.004  |
| 2 |        |                                                          | 305    | 0.9%  |        |        |

|   |        |                                                       |       |       |        |        |
|---|--------|-------------------------------------------------------|-------|-------|--------|--------|
| 1 | F17    | Nicotine dependence                                   | 2,394 | 7.4%  | <0.001 | 0.039  |
| 2 |        |                                                       | 2,074 | 6.4%  | 1      |        |
| 1 | E66.0  | Obesity due to excess calories                        | 5,852 | 18.1% | 0.894  | 0.001  |
| 2 |        |                                                       | 5,865 | 18.2% |        |        |
| 1 | E66.2  | Morbid (severe) obesity with alveolar hypoventilation | 227   | 0.7%  | 0.887  | 0.001  |
| 2 |        |                                                       | 224   | 0.7%  |        |        |
| 1 | E66.3  | Overweight                                            | 534   | 1.7%  | 0.012  | 0.020  |
| 2 |        |                                                       | 456   | 1.4%  |        |        |
| 1 | E66.8  | Other obesity                                         | 189   | 0.6%  | 0.759  | 0.002  |
| 2 |        |                                                       | 195   | 0.6%  |        |        |
| 1 | E66.9  | Obesity, unspecified                                  | 8,104 | 25.1% | 0.206  | 0.010  |
| 2 |        |                                                       | 7,965 | 24.7% |        |        |
| 1 | Z72.0  | Tobacco use                                           | 584   | 1.8%  | 0.033  | 0.017  |
| 2 |        |                                                       | 514   | 1.6%  |        |        |
| 1 | Z72.3  | Lack of physical exercise                             | 20    | 0.1%  | 0.068  | 0.014  |
| 2 |        |                                                       | 10    | 0.0%  |        |        |
| 1 | Z72.4  | Inappropriate diet and eating habits                  | 42    | 0.1%  | 0.018  | 0.019  |
| 2 |        |                                                       | 23    | 0.1%  |        |        |
| 1 | B18    | Chronic viral hepatitis                               | 350   | 1.1%  | 0.054  | 0.015  |
| 2 |        |                                                       | 301   | 0.9%  |        |        |
| 1 | K74    | Fibrosis and cirrhosis of liver                       | 666   | 2.1%  | 0.697  | 0.003  |
| 2 |        |                                                       | 652   | 2.0%  |        |        |
| 1 | K76.0  | Fatty (change of) liver, not elsewhere classified     | 1,454 | 4.5%  | 0.004  | 0.023  |
| 2 |        |                                                       | 1,304 | 4.0%  |        |        |
| 1 | K74.3  | Primary biliary cirrhosis                             | 27    | 0.1%  | 0.438  | 0.006  |
| 2 |        |                                                       | 33    | 0.1%  |        |        |
| 1 | E83.11 | Hereditary hemochromatosis                            | 24    | 0.1%  | 0.354  | 0.007  |
| 2 | 0      |                                                       | 18    | 0.1%  |        |        |
| 1 | E70.21 | Tyrosinemia                                           | 10    | 0.0%  | 1      | <0.001 |
| 2 |        |                                                       | 10    | 0.0%  |        |        |
| 1 | E88.01 | Alpha-1-antitrypsin deficiency                        | 14    | 0.0%  | 0.853  | 0.001  |
| 2 |        |                                                       | 15    | 0.0%  |        |        |
| 1 | E80.1  | Porphyria cutanea tarda                               | 10    | 0.0%  | 1      | <0.001 |
| 2 |        |                                                       | 10    | 0.0%  |        |        |
| 1 | E74.0  | Glycogen storage disease                              | 10    | 0.0%  | 1      | <0.001 |
| 2 |        |                                                       | 10    | 0.0%  |        |        |
| 1 | E83.00 | Disorder of copper metabolism, unspecified            | 10    | 0.0%  | 1      | <0.001 |
| 2 |        |                                                       | 10    | 0.0%  |        |        |

|   |       |                                                                 |    |      |       |        |
|---|-------|-----------------------------------------------------------------|----|------|-------|--------|
| 1 | T64   | Toxic effect of aflatoxin and other mycotoxin food contaminants | 10 | 0.0% | 1     | <0.001 |
| 2 |       |                                                                 | 10 | 0.0% |       |        |
| 1 | D13.4 | Benign neoplasm of liver                                        | 16 | 0.0% | 0.715 | 0.003  |
| 2 |       |                                                                 | 14 | 0.0% |       |        |

### Medication

| Group  | Mean ± SD                                          | Patients | % of Group | P-Value | SMD   |
|--------|----------------------------------------------------|----------|------------|---------|-------|
| 1 A10A | INSULINS AND ANALOGUES                             | 14,044   | 43.5%      | 0.703   | 0.003 |
| 2      |                                                    | 14,092   | 43.7%      |         |       |
| 1 A10B | Sulfonylureas                                      | 5,425    | 16.8%      | 0.077   | 0.014 |
| 2 B    |                                                    | 5,258    | 16.3%      |         |       |
| 1 A10B | Alpha glucosidase inhibitors                       | 122      | 0.4%       | 0.949   | 0.001 |
| 2 F    |                                                    | 123      | 0.4%       |         |       |
| 1 A10B | Thiazolidinediones                                 | 1,933    | 6.0%       | 0.164   | 0.011 |
| 2 G    |                                                    | 1,850    | 5.7%       |         |       |
| 1 A10B | Dipeptidyl peptidase 4 (DPP-4) inhibitors          | 3,476    | 10.8%      | 0.054   | 0.015 |
| 2 H    |                                                    | 3,326    | 10.3%      |         |       |
| 1 A10B | Sodium-glucose co-transporter 2 (SGLT2) inhibitors | 1,749    | 5.4%       | 0.001   | 0.027 |
| 2 K    |                                                    | 1,559    | 4.8%       |         |       |
| 1 A10B | Other blood glucose lowering drugs, excl. insulins | 656      | 2.0%       | 0.737   | 0.003 |
| 2 X    |                                                    | 644      | 2.0%       |         |       |
| 1 A14A | ANABOLIC STEROIDS                                  | 17       | 0.1%       | 0.217   | 0.010 |
| 2      |                                                    | 25       | 0.1%       |         |       |

eTable 22. Characteristics of the GLP-1RA/no metformin group and metformin/no GLP-1RA group before and after matched for covariates related to ovarian cancer for the study populations of women with T2D and no history of any OAC

| <b>Group 1 (N = 17,278) and group 2 (N = 399,923) characteristics before propensity score matching</b> |        |                                                                                               |               |            |         |       |       |
|--------------------------------------------------------------------------------------------------------|--------|-----------------------------------------------------------------------------------------------|---------------|------------|---------|-------|-------|
| <b>Demographics</b>                                                                                    |        |                                                                                               |               |            |         |       |       |
| Group                                                                                                  |        | Mean ± SD                                                                                     | Patients      | % of Group | P-Value | SMD   |       |
| 1                                                                                                      | AI     | Age at Index                                                                                  | 57.7 +/- 12.8 | 17,278     | 100%    | <0.00 | 0.160 |
| 2                                                                                                      |        |                                                                                               | 60.0 +/- 14.7 | 399,923    | 100%    | 1     |       |
| 1                                                                                                      | 2106-3 | White                                                                                         |               | 11,336     | 65.6%   | <0.00 | 0.158 |
| 2                                                                                                      |        |                                                                                               |               | 231,828    | 58.0%   | 1     |       |
| 1                                                                                                      | 1002-5 | American Indian or Alaska Native                                                              |               | 59         | 0.3%    | 0.334 | 0.008 |
| 2                                                                                                      |        |                                                                                               |               | 1,552      | 0.4%    |       |       |
| 1                                                                                                      | UNK    | Unknown Race                                                                                  |               | 1,563      | 9.0%    | <0.00 | 0.107 |
| 2                                                                                                      |        |                                                                                               |               | 49,384     | 12.3%   | 1     |       |
| 1                                                                                                      | 2076-8 | Native Hawaiian or Other Pacific Islander                                                     |               | 80         | 0.5%    | <0.00 | 0.033 |
| 2                                                                                                      |        |                                                                                               |               | 2,869      | 0.7%    | 1     |       |
| 1                                                                                                      | UN     | Unknown Ethnicity                                                                             |               | 3,145      | 18.2%   | <0.00 | 0.188 |
| 2                                                                                                      |        |                                                                                               |               | 103,904    | 26.0%   | 1     |       |
| 1                                                                                                      | 2186-5 | Not Hispanic or Latino                                                                        |               | 12,481     | 72.2%   | <0.00 | 0.219 |
| 2                                                                                                      |        |                                                                                               |               | 247,896    | 62.0%   | 1     |       |
| 1                                                                                                      | 2135-2 | Hispanic or Latino                                                                            |               | 1,652      | 9.6%    | <0.00 | 0.080 |
| 2                                                                                                      |        |                                                                                               |               | 48,123     | 12.0%   | 1     |       |
| 1                                                                                                      | 2054-5 | Black or African American                                                                     |               | 3,476      | 20.1%   | 0.723 | 0.003 |
| 2                                                                                                      |        |                                                                                               |               | 80,016     | 20.0%   |       |       |
| 1                                                                                                      | 2028-9 | Asian                                                                                         |               | 311        | 1.8%    | <0.00 | 0.149 |
| 2                                                                                                      |        |                                                                                               |               | 17,483     | 4.4%    | 1     |       |
| <b>Diagnosis</b>                                                                                       |        |                                                                                               |               |            |         |       |       |
| Group                                                                                                  |        | Mean ± SD                                                                                     | Patients      | % of Group | P-Value | SMD   |       |
| 1                                                                                                      | Z55-   | Persons with potential health hazards related to socioeconomic and psychosocial circumstances | 270           | 1.6%       | 0.003   | 0.022 |       |
| 2                                                                                                      | Z65    |                                                                                               | 5,204         | 1.3%       |         |       |       |
| 1                                                                                                      | E66    | Overweight and obesity                                                                        | 6,461         | 37.4%      | <0.00   | 0.399 |       |
| 2                                                                                                      |        |                                                                                               | 78,874        | 19.7%      | 1       |       |       |

|   |        |                                                       |        |       |       |       |
|---|--------|-------------------------------------------------------|--------|-------|-------|-------|
| 1 | Z68.3  | Body mass index [BMI] 30-39, adult                    | 1,360  | 7.9%  | <0.00 | 0.203 |
| 2 |        |                                                       | 13,007 | 3.3%  | 1     |       |
| 1 | Z68.4  | Body mass index [BMI] 40 or greater, adult            | 1,671  | 9.7%  | <0.00 | 0.264 |
| 2 |        |                                                       | 12,991 | 3.2%  | 1     |       |
| 1 | Z68.25 | Body mass index [BMI] 25.0-25.9, adult                | 39     | 0.2%  | 0.039 | 0.015 |
| 2 |        |                                                       | 643    | 0.2%  |       |       |
| 1 | Z68.26 | Body mass index [BMI] 26.0-26.9, adult                | 52     | 0.3%  | <0.00 | 0.031 |
| 2 |        |                                                       | 616    | 0.2%  | 1     |       |
| 1 | Z68.27 | Body mass index [BMI] 27.0-27.9, adult                | 59     | 0.3%  | <0.00 | 0.029 |
| 2 |        |                                                       | 760    | 0.2%  | 1     |       |
| 1 | Z68.28 | Body mass index [BMI] 28.0-28.9, adult                | 69     | 0.4%  | <0.00 | 0.033 |
| 2 |        |                                                       | 862    | 0.2%  | 1     |       |
| 1 | Z68.29 | Body mass index [BMI] 29.0-29.9, adult                | 76     | 0.4%  | <0.00 | 0.031 |
| 2 |        |                                                       | 1,029  | 0.3%  | 1     |       |
| 1 | F10    | Alcohol related disorders                             | 128    | 0.7%  | <0.00 | 0.044 |
| 2 |        |                                                       | 4,677  | 1.2%  | 1     |       |
| 1 | Z80    | Family history of primary malignant neoplasm          | 821    | 4.8%  | <0.00 | 0.124 |
| 2 |        |                                                       | 9,798  | 2.4%  | 1     |       |
| 1 | Z15.0  | Genetic susceptibility to malignant neoplasm          | 15     | 0.1%  | <0.00 | 0.027 |
| 2 |        |                                                       | 91     | 0.0%  | 1     |       |
| 1 | Z12    | Encounter for screening for malignant neoplasms       | 4,113  | 23.8% | <0.00 | 0.149 |
| 2 |        |                                                       | 71,089 | 17.8% | 1     |       |
| 1 | Z85    | Personal history of malignant neoplasm                | 492    | 2.8%  | <0.00 | 0.032 |
| 2 |        |                                                       | 9,342  | 2.3%  | 1     |       |
| 1 | Z98.84 | Bariatric surgery status                              | 378    | 2.2%  | <0.00 | 0.145 |
| 2 |        |                                                       | 2,056  | 0.5%  | 1     |       |
| 1 | F17    | Nicotine dependence                                   | 1,246  | 7.2%  | 0.003 | 0.024 |
| 2 |        |                                                       | 31,324 | 7.8%  |       |       |
| 1 | E66.0  | Obesity due to excess calories                        | 3,456  | 20.0% | <0.00 | 0.354 |
| 2 |        |                                                       | 31,701 | 7.9%  | 1     |       |
| 1 | E66.2  | Morbid (severe) obesity with alveolar hypoventilation | 132    | 0.8%  | <0.00 | 0.070 |
| 2 |        |                                                       | 1,060  | 0.3%  | 1     |       |



|   |        |                                 |        |       |       |       |
|---|--------|---------------------------------|--------|-------|-------|-------|
| 1 | E66.3  | Overweight                      | 280    | 1.6%  | <0.00 | 0.064 |
| 2 |        |                                 | 3,619  | 0.9%  | 1     |       |
| 1 | E66.8  | Other obesity                   | 118    | 0.7%  | <0.00 | 0.084 |
| 2 |        |                                 | 574    | 0.1%  | 1     |       |
| 1 | E66.9  | Obesity, unspecified            | 4,568  | 26.4% | <0.00 | 0.291 |
| 2 |        |                                 | 59,095 | 14.8% | 1     |       |
| 1 | Z72.0  | Tobacco use                     | 334    | 1.9%  | <0.00 | 0.056 |
| 2 |        |                                 | 4,947  | 1.2%  | 1     |       |
| 1 | Z79.89 | Hormone                         | 85     | 0.5%  | <0.00 | 0.025 |
| 2 | 0      | replacement therapy             | 1,319  | 0.3%  | 1     |       |
| 1 | Z92.23 | Personal history of             | 10     | 0.1%  | 0.030 | 0.014 |
| 2 |        | estrogen therapy                | 115    | 0.0%  |       |       |
| 1 | Z80.3  | Family history of               | 390    | 2.3%  | <0.00 | 0.081 |
| 2 |        | malignant neoplasm<br>of breast | 4,796  | 1.2%  | 1     |       |
| 1 | E28.2  | Polycystic ovarian              | 264    | 1.5%  | <0.00 | 0.060 |
| 2 |        | syndrome                        | 3,504  | 0.9%  | 1     |       |
| 1 | Z80.41 | Family history of               | 50     | 0.3%  | <0.00 | 0.032 |
| 2 |        | malignant neoplasm<br>of ovary  | 568    | 0.1%  | 1     |       |
| 1 | D27    | Benign neoplasm of              | 39     | 0.2%  | 0.871 | 0.001 |
| 2 |        | ovary                           | 879    | 0.2%  |       |       |

### Medication

| Group  | Mean ± SD | Patients | % of Group | P-Value | SMD   |
|--------|-----------|----------|------------|---------|-------|
| 1 A10B |           | 145      | 0.8%       | <0.00   | 0.116 |
| 2 A    |           | 9,080    | 2.3%       | 1       |       |
| 1 A10B |           | 2,808    | 16.3%      | <0.00   | 0.261 |
| 2 B    |           | 31,308   | 7.8%       | 1       |       |
| 1 A10B |           | 60       | 0.3%       | <0.00   | 0.050 |
| 2 F    |           | 436      | 0.1%       | 1       |       |
| 1 A10B |           | 974      | 5.6%       | <0.00   | 0.172 |
| 2 G    |           | 9,195    | 2.3%       | 1       |       |
| 1 A10B |           | 1,906    | 11.0%      | <0.00   | 0.374 |
| 2 H    |           | 7,852    | 2.0%       | 1       |       |
| 1 A10B |           | 918      | 5.3%       | <0.00   | 0.305 |
| 2 K    |           | 1,296    | 0.3%       | 1       |       |
| 1 A10B |           | 349      | 2.0%       | <0.00   | 0.142 |
| 2 X    |           | 1,821    | 0.5%       | 1       |       |

|   |       |               |  |        |      |       |       |
|---|-------|---------------|--|--------|------|-------|-------|
| 1 | HS200 | CONTRACEPTIVE |  | 718    | 4.2% | <0.00 |       |
| 2 |       | S,SYSTEMIC    |  | 10,566 | 2.6% | 1     | 0.084 |

**Group 1 (N = 17,197) and group 2 (N = 17,197) characteristics after propensity score matching**

**Demographics**

| Group |        | Mean ± SD                                 | Patients      | % of Group | P-Value | SMD   |       |
|-------|--------|-------------------------------------------|---------------|------------|---------|-------|-------|
| 1     | AI     | Age at Index                              | 57.8 +/- 12.8 | 17,197     | 100%    | 0.072 | 0.019 |
| 2     |        |                                           | 57.5 +/- 13.7 | 17,197     | 100%    |       |       |
| 1     | 2106-3 | White                                     |               | 11,276     | 65.6%   | 0.005 | 0.031 |
| 2     |        |                                           |               | 11,525     | 67.0%   |       |       |
| 1     | 1002-5 | American Indian or Alaska Native          |               | 59         | 0.3%    | 0.445 | 0.008 |
| 2     |        |                                           |               | 51         | 0.3%    |       |       |
| 1     | UNK    | Unknown Race                              |               | 1,560      | 9.1%    | 0.041 | 0.022 |
| 2     |        |                                           |               | 1,453      | 8.4%    |       |       |
| 1     | 2076-8 | Native Hawaiian or Other Pacific Islander |               | 80         | 0.5%    | 0.628 | 0.005 |
| 2     |        |                                           |               | 74         | 0.4%    |       |       |
| 1     | UN     | Unknown Ethnicity                         |               | 3,140      | 18.3%   | 0.015 | 0.026 |
| 2     |        |                                           |               | 2,967      | 17.3%   |       |       |
| 1     | 2186-5 | Not Hispanic or Latino                    |               | 12,416     | 72.2%   | 0.002 | 0.033 |
| 2     |        |                                           |               | 12,670     | 73.7%   |       |       |
| 1     | 2135-2 | Hispanic or Latino                        |               | 1,641      | 9.5%    | 0.133 | 0.016 |
| 2     |        |                                           |               | 1,560      | 9.1%    |       |       |
| 1     | 2054-5 | Black or African American                 |               | 3,459      | 20.1%   | 0.318 | 0.011 |
| 2     |        |                                           |               | 3,385      | 19.7%   |       |       |
| 1     | 2028-9 | Asian                                     |               | 311        | 1.8%    | 0.567 | 0.006 |
| 2     |        |                                           |               | 297        | 1.7%    |       |       |

**Diagnosis**

| Group |       | Mean ± SD                                                                                     | Patients | % of Group | P-Value | SMD   |       |
|-------|-------|-----------------------------------------------------------------------------------------------|----------|------------|---------|-------|-------|
| 1     | Z55-  | Persons with potential health hazards related to socioeconomic and psychosocial circumstances |          | 269        | 1.6%    | 0.096 | 0.018 |
| 2     | Z65   |                                                                                               |          | 232        | 1.3%    |       |       |
| 1     | E66   | Overweight and obesity                                                                        |          | 6,398      | 37.2%   | 0.421 | 0.009 |
| 2     |       |                                                                                               |          | 6,326      | 36.8%   |       |       |
| 1     | Z68.3 | Body mass index [BMI] 30-39, adult                                                            |          | 1,331      | 7.7%    | 0.405 | 0.009 |
| 2     |       |                                                                                               |          | 1,290      | 7.5%    |       |       |

|        |        |                                                             |                |                |            |       |
|--------|--------|-------------------------------------------------------------|----------------|----------------|------------|-------|
| 1<br>2 | Z68.4  | Body mass index<br>[BMI] 40 or greater,<br>adult            | 1,643<br>1,621 | 9.6%<br>9.4%   | 0.686      | 0.004 |
| 1<br>2 | Z68.25 | Body mass index<br>[BMI] 25.0-25.9,<br>adult                | 38<br>25       | 0.2%<br>0.1%   | 0.101      | 0.018 |
| 1<br>2 | Z68.26 | Body mass index<br>[BMI] 26.0-26.9,<br>adult                | 50<br>47       | 0.3%<br>0.3%   | 0.760      | 0.003 |
| 1<br>2 | Z68.27 | Body mass index<br>[BMI] 27.0-27.9,<br>adult                | 58<br>54       | 0.3%<br>0.3%   | 0.705      | 0.004 |
| 1<br>2 | Z68.28 | Body mass index<br>[BMI] 28.0-28.9,<br>adult                | 64<br>57       | 0.4%<br>0.3%   | 0.524      | 0.007 |
| 1<br>2 | Z68.29 | Body mass index<br>[BMI] 29.0-29.9,<br>adult                | 75<br>77       | 0.4%<br>0.4%   | 0.871      | 0.002 |
| 1<br>2 | F10    | Alcohol related<br>disorders                                | 126<br>87      | 0.7%<br>0.5%   | 0.007      | 0.029 |
| 1<br>2 | Z80    | Family history of<br>primary malignant<br>neoplasm          | 802<br>742     | 4.7%<br>4.3%   | 0.118      | 0.017 |
| 1<br>2 | Z15.0  | Genetic<br>susceptibility to<br>malignant neoplasm          | 15<br>10       | 0.1%<br>0.1%   | 0.317      | 0.011 |
| 1<br>2 | Z12    | Encounter for<br>screening for<br>malignant neoplasms       | 4,067<br>3,779 | 23.6%<br>22.0% | <0.00<br>1 | 0.040 |
| 1<br>2 | Z85    | Personal history of<br>malignant neoplasm                   | 487<br>441     | 2.8%<br>2.6%   | 0.126      | 0.017 |
| 1<br>2 | Z98.84 | Bariatric surgery<br>status                                 | 364<br>367     | 2.1%<br>2.1%   | 0.911      | 0.001 |
| 1<br>2 | F17    | Nicotine dependence                                         | 1,237<br>1,126 | 7.2%<br>6.5%   | 0.018      | 0.026 |
| 1<br>2 | E66.0  | Obesity due to<br>excess calories                           | 3,409<br>3,333 | 19.8%<br>19.4% | 0.302      | 0.011 |
| 1<br>2 | E66.2  | Morbid (severe)<br>obesity with alveolar<br>hypoventilation | 130<br>120     | 0.8%<br>0.7%   | 0.526      | 0.007 |
| 1<br>2 | E66.3  | Overweight                                                  | 276<br>268     | 1.6%<br>1.6%   | 0.730      | 0.004 |

|   |        |                      |       |       |       |        |
|---|--------|----------------------|-------|-------|-------|--------|
| 1 | E66.8  | Other obesity        | 116   | 0.7%  | 0.111 | 0.017  |
| 2 |        |                      | 93    | 0.5%  |       |        |
| 1 | E66.9  | Obesity, unspecified | 4,520 | 26.3% | 0.104 | 0.018  |
| 2 |        |                      | 4,388 | 25.5% |       |        |
| 1 | Z72.0  | Tobacco use          | 330   | 1.9%  | 0.158 | 0.015  |
| 2 |        |                      | 295   | 1.7%  |       |        |
| 1 | Z79.89 | Hormone              | 83    | 0.5%  | 0.138 | 0.016  |
| 2 | 0      | replacement therapy  | 65    | 0.4%  |       |        |
| 1 | Z92.23 | Personal history of  | 10    | 0.1%  | 1     | <0.001 |
| 2 |        | estrogen therapy     | 10    | 0.1%  |       |        |
| 1 | Z80.3  | Family history of    | 381   | 2.2%  | 0.177 | 0.015  |
| 2 |        | malignant neoplasm   | 345   | 2.0%  |       |        |
|   |        | of breast            |       |       |       |        |
| 1 | E28.2  | Polycystic ovarian   | 263   | 1.5%  | 0.324 | 0.011  |
| 2 |        | syndrome             | 241   | 1.4%  |       |        |
| 1 | Z80.41 | Family history of    | 48    | 0.3%  | 0.755 | 0.003  |
| 2 |        | malignant neoplasm   | 45    | 0.3%  |       |        |
|   |        | of ovary             |       |       |       |        |
| 1 | D27    | Benign neoplasm of   | 39    | 0.2%  | 1     | <0.001 |
| 2 |        | ovary                | 39    | 0.2%  |       |        |

### Medication

| Group   | Mean ± SD | Patients | % of Group | P-Value | SMD   |
|---------|-----------|----------|------------|---------|-------|
| 1 A10B  |           | 145      | 0.8%       | 0.039   | 0.022 |
| 2 A     |           | 112      | 0.7%       |         |       |
|         |           |          |            |         |       |
| 1 A10B  |           | 2,762    | 16.1%      | 0.461   | 0.008 |
| 2 B     |           | 2,712    | 15.8%      |         |       |
|         |           |          |            |         |       |
| 1 A10B  |           | 59       | 0.3%       | 0.139   | 0.016 |
| 2 F     |           | 44       | 0.3%       |         |       |
|         |           |          |            |         |       |
| 1 A10B  |           | 946      | 5.5%       | 0.377   | 0.010 |
| 2 G     |           | 909      | 5.3%       |         |       |
|         |           |          |            |         |       |
| 1 A10B  |           | 1,834    | 10.7%      | 0.875   | 0.002 |
| 2 H     |           | 1,843    | 10.7%      |         |       |
|         |           |          |            |         |       |
| 1 A10B  |           | 847      | 4.9%       | 0.047   | 0.021 |
| 2 K     |           | 769      | 4.5%       |         |       |
|         |           |          |            |         |       |
| 1 A10B  |           | 329      | 1.9%       | 0.233   | 0.013 |
| 2 X     |           | 360      | 2.1%       |         |       |
|         |           |          |            |         |       |
| 1 HS200 |           | 706      | 4.1%       | 0.142   | 0.016 |
| 2       |           | 653      | 3.8%       |         |       |
|         |           |          |            |         |       |



eTable 23. Characteristics of the GLP-1RA/no metformin group and metformin/no GLP-1RA group before and after matched for covariates related to pancreatic cancer for the study populations of patients with T2D and no history of any OAC

| <b>Group 1 (N = 32,365) and group 2 (N = 856,160) characteristics before propensity score matching</b> |        |                                                                    |               |            |         |       |       |
|--------------------------------------------------------------------------------------------------------|--------|--------------------------------------------------------------------|---------------|------------|---------|-------|-------|
| <b>Demographics</b>                                                                                    |        |                                                                    |               |            |         |       |       |
| Group                                                                                                  |        | Mean ± SD                                                          | Patients      | % of Group | P-Value | SMD   |       |
| 1                                                                                                      | AI     | Age at Index                                                       | 59.0 +/- 12.4 | 32,365     | 100%    | <0.00 | 0.080 |
| 2                                                                                                      |        |                                                                    | 60.1 +/- 14.0 | 856,160    | 100%    | 1     |       |
| 1                                                                                                      | 2106-3 | White                                                              |               | 21,231     | 65.6%   | <0.00 | 0.111 |
| 2                                                                                                      |        |                                                                    |               | 515,868    | 60.3%   | 1     |       |
| 1                                                                                                      | 1002-5 | American Indian or Alaska Native                                   |               | 98         | 0.3%    | 0.092 | 0.010 |
| 2                                                                                                      |        |                                                                    |               | 3,080      | 0.4%    |       |       |
| 1                                                                                                      | UNK    | Unknown Race                                                       |               | 4,272      | 13.2%   | <0.00 | 0.021 |
| 2                                                                                                      |        |                                                                    |               | 119,036    | 13.9%   | 1     |       |
| 1                                                                                                      | F      | Female                                                             |               | 17,278     | 53.4%   | <0.00 | 0.134 |
| 2                                                                                                      |        |                                                                    |               | 399,923    | 46.7%   | 1     |       |
| 1                                                                                                      | 2076-8 | Native Hawaiian or Other Pacific Islander                          |               | 172        | 0.5%    | 0.001 | 0.020 |
| 2                                                                                                      |        |                                                                    |               | 5,884      | 0.7%    |       |       |
| 1                                                                                                      | UN     | Unknown Gender                                                     |               | 1,670      | 5.2%    | <0.00 | 0.152 |
| 2                                                                                                      |        |                                                                    |               | 19,592     | 2.3%    | 1     |       |
| 1                                                                                                      | 2186-5 | Not Hispanic or Latino                                             |               | 22,299     | 68.9%   | <0.00 | 0.151 |
| 2                                                                                                      |        |                                                                    |               | 528,686    | 61.8%   | 1     |       |
| 1                                                                                                      | 2135-2 | Hispanic or Latino                                                 |               | 2,660      | 8.2%    | <0.00 | 0.084 |
| 2                                                                                                      |        |                                                                    |               | 91,303     | 10.7%   | 1     |       |
| 1                                                                                                      | 2054-5 | Black or African American                                          |               | 5,107      | 15.8%   | <0.00 | 0.021 |
| 2                                                                                                      |        |                                                                    |               | 141,606    | 16.5%   | 1     |       |
| 1                                                                                                      | M      | Male                                                               |               | 13,417     | 41.5%   | <0.00 | 0.192 |
| 2                                                                                                      |        |                                                                    |               | 436,645    | 51.0%   | 1     |       |
| 1                                                                                                      | 2028-9 | Asian                                                              |               | 681        | 2.1%    | <0.00 | 0.118 |
| 2                                                                                                      |        |                                                                    |               | 35,540     | 4.2%    | 1     |       |
| <b>Diagnosis</b>                                                                                       |        |                                                                    |               |            |         |       |       |
| Group                                                                                                  |        | Mean ± SD                                                          | Patients      | % of Group | P-Value | SMD   |       |
| 1                                                                                                      | Z55-   | Persons with potential health hazards related to socioeconomic and | 422           | 1.3%       | 0.107   | 0.009 |       |
| 2                                                                                                      | Z65    |                                                                    | 10,310        | 1.2%       |         |       |       |

|   |        | psychosocial<br>circumstances                         |         |       |       |       |
|---|--------|-------------------------------------------------------|---------|-------|-------|-------|
| 1 | E66    | Overweight and<br>obesity                             | 11,418  | 35.3% | <0.00 | 0.411 |
| 2 |        |                                                       | 149,974 | 17.5% | 1     |       |
| 1 | Z68.3  | Body mass index<br>[BMI] 30-39, adult                 | 3,285   | 10.1% | <0.00 | 0.249 |
| 2 |        |                                                       | 32,977  | 3.9%  | 1     |       |
| 1 | Z68.4  | Body mass index<br>[BMI] 40 or greater,<br>adult      | 3,012   | 9.3%  | <0.00 | 0.278 |
| 2 |        |                                                       | 23,535  | 2.7%  | 1     |       |
| 1 | Z68.25 | Body mass index<br>[BMI] 25.0-25.9,<br>adult          | 119     | 0.4%  | 0.001 | 0.018 |
| 2 |        |                                                       | 2,293   | 0.3%  |       |       |
| 1 | Z68.26 | Body mass index<br>[BMI] 26.0-26.9,<br>adult          | 150     | 0.5%  | <0.00 | 0.029 |
| 2 |        |                                                       | 2,433   | 0.3%  | 1     |       |
| 1 | Z68.27 | Body mass index<br>[BMI] 27.0-27.9,<br>adult          | 209     | 0.6%  | <0.00 | 0.043 |
| 2 |        |                                                       | 2,942   | 0.3%  | 1     |       |
| 1 | Z68.28 | Body mass index<br>[BMI] 28.0-28.9,<br>adult          | 264     | 0.8%  | <0.00 | 0.055 |
| 2 |        |                                                       | 3,317   | 0.4%  | 1     |       |
| 1 | Z68.29 | Body mass index<br>[BMI] 29.0-29.9,<br>adult          | 299     | 0.9%  | <0.00 | 0.059 |
| 2 |        |                                                       | 3,753   | 0.4%  | 1     |       |
| 1 | F10    | Alcohol related<br>disorders                          | 460     | 1.4%  | <0.00 | 0.076 |
| 2 |        |                                                       | 21,150  | 2.5%  | 1     |       |
| 1 | Z80    | Family history of<br>primary malignant<br>neoplasm    | 1,222   | 3.8%  | <0.00 | 0.114 |
| 2 |        |                                                       | 16,133  | 1.9%  | 1     |       |
| 1 | Z15.0  | Genetic<br>susceptibility to<br>malignant neoplasm    | 18      | 0.1%  | <0.00 | 0.021 |
| 2 |        |                                                       | 140     | 0.0%  | 1     |       |
| 1 | Z12    | Encounter for<br>screening for<br>malignant neoplasms | 6,223   | 19.2% | <0.00 | 0.157 |
| 2 |        |                                                       | 114,996 | 13.4% | 1     |       |
| 1 | Z85    | Personal history of<br>malignant neoplasm             | 1,111   | 3.4%  | <0.00 | 0.042 |
| 2 |        |                                                       | 23,231  | 2.7%  | 1     |       |
| 1 | Z98.84 | Bariatric surgery<br>status                           | 534     | 1.6%  | <0.00 | 0.131 |
| 2 |        |                                                       | 2,989   | 0.3%  | 1     |       |
| 1 | E66.0  | Obesity due to<br>excess calories                     | 5,910   | 18.3% | <0.00 | 0.361 |
| 2 |        |                                                       | 56,178  | 6.6%  | 1     |       |

|                   |        |                                                                               |          |            |         |       |
|-------------------|--------|-------------------------------------------------------------------------------|----------|------------|---------|-------|
| 1                 | E66.2  | Morbid (severe) obesity with alveolar hypoventilation                         | 230      | 0.7%       | <0.00   | 0.069 |
| 2                 |        |                                                                               | 2,051    | 0.2%       | 1       |       |
| 1                 | E66.3  | Overweight                                                                    | 535      | 1.7%       | <0.00   | 0.066 |
| 2                 |        |                                                                               | 7,794    | 0.9%       | 1       |       |
| 1                 | E66.8  | Other obesity                                                                 | 193      | 0.6%       | <0.00   | 0.078 |
| 2                 |        |                                                                               | 1,084    | 0.1%       | 1       |       |
| 1                 | E66.9  | Obesity, unspecified                                                          | 8,150    | 25.2%      | <0.00   | 0.307 |
| 2                 |        |                                                                               | 113,380  | 13.2%      | 1       |       |
| 1                 | Z72.3  | Lack of physical exercise                                                     | 20       | 0.1%       | 0.001   | 0.015 |
| 2                 |        |                                                                               | 251      | 0.0%       |         |       |
| 1                 | Z72.4  | Inappropriate diet and eating habits                                          | 43       | 0.1%       | <0.00   | 0.044 |
| 2                 |        |                                                                               | 118      | 0.0%       | 1       |       |
| 1                 | Z85.09 | Personal history of malignant neoplasm of other digestive organs              | 10       | 0.0%       | 0.032   | 0.010 |
| 2                 |        |                                                                               | 133      | 0.0%       |         |       |
| 1                 | B96.8  | Helicobacter pylori [H. pylori] as the cause of diseases classified elsewhere | 141      | 0.4%       | 0.259   | 0.006 |
| 2                 |        |                                                                               | 3,386    | 0.4%       |         |       |
| 1                 | Z80.0  | Family history of malignant neoplasm of digestive organs                      | 413      | 1.3%       | <0.00   | 0.055 |
| 2                 |        |                                                                               | 6,255    | 0.7%       | 1       |       |
| 1                 | B18    | Chronic viral hepatitis                                                       | 352      | 1.1%       | 0.001   | 0.018 |
| 2                 |        |                                                                               | 7,813    | 0.9%       |         |       |
| 1                 | K86.1  | Other chronic pancreatitis                                                    | 96       | 0.3%       | <0.00   | 0.031 |
| 2                 |        |                                                                               | 4,175    | 0.5%       | 1       |       |
| 1                 | B16    | Acute hepatitis B                                                             | 50       | 0.2%       | 0.191   | 0.007 |
| 2                 |        |                                                                               | 1,095    | 0.1%       |         |       |
| 1                 | B18.1  | Chronic viral hepatitis B without delta-agent                                 | 58       | 0.2%       | 0.036   | 0.011 |
| 2                 |        |                                                                               | 1,158    | 0.1%       |         |       |
| 1                 | Z72.0  | Tobacco use                                                                   | 588      | 1.8%       | <0.00   | 0.034 |
| 2                 |        |                                                                               | 11,927   | 1.4%       | 1       |       |
| 1                 | D13.6  | Benign neoplasm of pancreas                                                   | 10       | 0.0%       | 0.616   | 0.003 |
| 2                 |        |                                                                               | 225      | 0.0%       |         |       |
| <b>Medication</b> |        |                                                                               |          |            |         |       |
| Group             |        | Mean ± SD                                                                     | Patients | % of Group | P-Value | SMD   |
| 1                 | A10A   | INSULINS AND ANALOGUES                                                        | 14,131   | 43.7%      | <0.00   | 0.560 |
| 2                 |        |                                                                               | 159,901  | 18.7%      | 1       |       |



|   |      |                                                    |        |       |       |       |
|---|------|----------------------------------------------------|--------|-------|-------|-------|
| 1 | A10B | Sulfonylureas                                      | 5,464  | 16.9% | <0.00 | 0.269 |
| 2 | B    |                                                    | 69,045 | 8.1%  | 1     |       |
| 1 | A10B | Alpha glucosidase inhibitors                       | 124    | 0.4%  | <0.00 | 0.057 |
| 2 | F    |                                                    | 876    | 0.1%  | 1     |       |
| 1 | A10B | Thiazolidinediones                                 | 1,960  | 6.1%  | <0.00 | 0.183 |
| 2 | G    |                                                    | 20,400 | 2.4%  | 1     |       |
| 1 | A10B | Dipeptidyl peptidase 4 (DPP-4) inhibitors          | 3,547  | 11.0% | <0.00 | 0.370 |
| 2 | H    |                                                    | 17,113 | 2.0%  | 1     |       |
| 1 | A10B | Sodium-glucose co-transporter 2 (SGLT2) inhibitors | 1,839  | 5.7%  | <0.00 | 0.312 |
| 2 | K    |                                                    | 3,371  | 0.4%  | 1     |       |
| 1 | A10B | Other blood glucose lowering drugs, excl. insulins | 672    | 2.1%  | <0.00 | 0.146 |
| 2 | X    |                                                    | 3,839  | 0.4%  | 1     |       |

**Group 1 (N = 32,271) and group 2 (N = 32,271) characteristics after propensity score matching**

**Demographics**

| Group  | Mean ± SD | Patients                                  | % of Group                     | P-Value          | SMD            |                     |
|--------|-----------|-------------------------------------------|--------------------------------|------------------|----------------|---------------------|
| 1<br>2 | AI        | Age at Index                              | 59.0 +/- 12.4<br>58.9 +/- 13.1 | 32,271<br>32,271 | 100%<br>100%   | 0.197<br>0.010      |
| 1<br>2 | 2106-3    | White                                     |                                | 21,164<br>21,603 | 65.6%<br>66.9% | <0.00<br>1<br>0.029 |
| 1<br>2 | 1002-5    | American Indian or Alaska Native          |                                | 98<br>111        | 0.3%<br>0.3%   | 0.368<br>0.007      |
| 1<br>2 | UNK       | Unknown Race                              |                                | 4,259<br>4,244   | 13.2%<br>13.2% | 0.861<br>0.001      |
| 1<br>2 | F         | Female                                    |                                | 17,215<br>17,471 | 53.3%<br>54.1% | 0.043<br>0.016      |
| 1<br>2 | 2076-8    | Native Hawaiian or Other Pacific Islander |                                | 172<br>158       | 0.5%<br>0.5%   | 0.440<br>0.006      |
| 1<br>2 | UN        | Unknown Gender                            |                                | 1,658<br>1,746   | 5.1%<br>5.4%   | 0.121<br>0.012      |
| 1<br>2 | 2186-5    | Not Hispanic or Latino                    |                                | 22,229<br>22,576 | 68.9%<br>70.0% | 0.003<br>0.023      |
| 1<br>2 | 2135-2    | Hispanic or Latino                        |                                | 2,652<br>2,444   | 8.2%<br>7.6%   | 0.002<br>0.024      |
| 1<br>2 | 2054-5    | Black or African American                 |                                | 5,093<br>4,838   | 15.8%<br>15.0% | 0.005<br>0.022      |

|                  |        |                                                                                               |           |          |            |         |       |
|------------------|--------|-----------------------------------------------------------------------------------------------|-----------|----------|------------|---------|-------|
| 1                |        |                                                                                               |           | 13,398   | 41.5%      |         |       |
| 2                | M      | Male                                                                                          |           | 13,054   | 40.5%      | 0.006   | 0.022 |
| 1                |        |                                                                                               |           | 681      | 2.1%       |         |       |
| 2                | 2028-9 | Asian                                                                                         |           | 604      | 1.9%       | 0.030   | 0.017 |
| <b>Diagnosis</b> |        |                                                                                               |           |          |            |         |       |
| Group            |        |                                                                                               | Mean ± SD | Patients | % of Group | P-Value | SMD   |
| 1                | Z55-   | Persons with potential health hazards related to socioeconomic and psychosocial circumstances |           | 419      | 1.3%       | 0.062   | 0.015 |
| 2                | Z65    |                                                                                               |           | 367      | 1.1%       |         |       |
| 1                | E66    | Overweight and obesity                                                                        |           | 11,342   | 35.1%      | 0.468   | 0.006 |
| 2                |        |                                                                                               |           | 11,254   | 34.9%      |         |       |
| 1                | Z68.3  | Body mass index [BMI] 30-39, adult                                                            |           | 3,247    | 10.1%      | 0.287   | 0.008 |
| 2                |        |                                                                                               |           | 3,166    | 9.8%       |         |       |
| 1                | Z68.4  | Body mass index [BMI] 40 or greater, adult                                                    |           | 2,972    | 9.2%       | 0.594   | 0.004 |
| 2                |        |                                                                                               |           | 2,933    | 9.1%       |         |       |
| 1                | Z68.25 | Body mass index [BMI] 25.0-25.9, adult                                                        |           | 119      | 0.4%       | 0.031   | 0.017 |
| 2                |        |                                                                                               |           | 88       | 0.3%       |         |       |
| 1                | Z68.26 | Body mass index [BMI] 26.0-26.9, adult                                                        |           | 150      | 0.5%       | 0.058   | 0.015 |
| 2                |        |                                                                                               |           | 119      | 0.4%       |         |       |
| 1                | Z68.27 | Body mass index [BMI] 27.0-27.9, adult                                                        |           | 208      | 0.6%       | 0.224   | 0.010 |
| 2                |        |                                                                                               |           | 184      | 0.6%       |         |       |
| 1                | Z68.28 | Body mass index [BMI] 28.0-28.9, adult                                                        |           | 262      | 0.8%       | 0.594   | 0.004 |
| 2                |        |                                                                                               |           | 250      | 0.8%       |         |       |
| 1                | Z68.29 | Body mass index [BMI] 29.0-29.9, adult                                                        |           | 298      | 0.9%       | 0.532   | 0.005 |
| 2                |        |                                                                                               |           | 283      | 0.9%       |         |       |
| 1                | F10    | Alcohol related disorders                                                                     |           | 458      | 1.4%       | <0.001  | 0.030 |
| 2                |        |                                                                                               |           | 352      | 1.1%       |         |       |
| 1                | Z80    | Family history of primary malignant neoplasm                                                  |           | 1,207    | 3.7%       | 0.004   | 0.023 |
| 2                |        |                                                                                               |           | 1,071    | 3.3%       |         |       |

|   |        |                                                                               |       |       |        |        |
|---|--------|-------------------------------------------------------------------------------|-------|-------|--------|--------|
| 1 | Z15.0  | Genetic susceptibility to malignant neoplasm                                  | 18    | 0.1%  | 0.601  | 0.004  |
| 2 |        |                                                                               | 15    | 0.0%  |        |        |
| 1 | Z12    | Encounter for screening for malignant neoplasms                               | 6,176 | 19.1% | <0.001 | 0.048  |
| 2 |        |                                                                               | 5,576 | 17.3% |        |        |
| 1 | Z85    | Personal history of malignant neoplasm                                        | 1,108 | 3.4%  | 0.246  | 0.009  |
| 2 |        |                                                                               | 1,055 | 3.3%  |        |        |
| 1 | Z98.84 | Bariatric surgery status                                                      | 520   | 1.6%  | 0.422  | 0.006  |
| 2 |        |                                                                               | 546   | 1.7%  |        |        |
| 1 | E66.0  | Obesity due to excess calories                                                | 5,853 | 18.1% | 0.632  | 0.004  |
| 2 |        |                                                                               | 5,900 | 18.3% |        |        |
| 1 | E66.2  | Morbid (severe) obesity with alveolar hypoventilation                         | 227   | 0.7%  | 0.335  | 0.008  |
| 2 |        |                                                                               | 207   | 0.6%  |        |        |
| 1 | E66.3  | Overweight                                                                    | 531   | 1.6%  | 0.070  | 0.014  |
| 2 |        |                                                                               | 474   | 1.5%  |        |        |
| 1 | E66.8  | Other obesity                                                                 | 188   | 0.6%  | 0.758  | 0.002  |
| 2 |        |                                                                               | 194   | 0.6%  |        |        |
| 1 | E66.9  | Obesity, unspecified                                                          | 8,094 | 25.1% | 0.133  | 0.012  |
| 2 |        |                                                                               | 7,929 | 24.6% |        |        |
| 1 | Z72.3  | Lack of physical exercise                                                     | 19    | 0.1%  | 0.752  | 0.002  |
| 2 |        |                                                                               | 21    | 0.1%  |        |        |
| 1 | Z72.4  | Inappropriate diet and eating habits                                          | 41    | 0.1%  | 0.182  | 0.011  |
| 2 |        |                                                                               | 54    | 0.2%  |        |        |
| 1 | Z85.09 | Personal history of malignant neoplasm of other digestive organs              | 10    | 0.0%  | 1      | <0.001 |
| 2 |        |                                                                               | 10    | 0.0%  |        |        |
| 1 | B96.8  | Helicobacter pylori [H. pylori] as the cause of diseases classified elsewhere | 140   | 0.4%  | 0.010  | 0.020  |
| 2 |        |                                                                               | 100   | 0.3%  |        |        |
| 1 | Z80.0  | Family history of malignant neoplasm of digestive organs                      | 410   | 1.3%  | 0.006  | 0.021  |
| 2 |        |                                                                               | 336   | 1.0%  |        |        |
| 1 | B18    | Chronic viral hepatitis                                                       | 352   | 1.1%  | 0.024  | 0.018  |
| 2 |        |                                                                               | 295   | 0.9%  |        |        |
| 1 | K86.1  | Other chronic pancreatitis                                                    | 96    | 0.3%  | 0.004  | 0.023  |
| 2 |        |                                                                               | 60    | 0.2%  |        |        |
| 1 | B16    | Acute hepatitis B                                                             | 50    | 0.2%  | 0.468  | 0.006  |
| 2 |        |                                                                               | 43    | 0.1%  |        |        |

|                   |       |                                                    |           |          |            |         |       |
|-------------------|-------|----------------------------------------------------|-----------|----------|------------|---------|-------|
| 1                 | B18.1 | Chronic viral hepatitis B without delta-agent      | 58        | 0.2%     | 0.705      | 0.003   |       |
| 2                 |       |                                                    | 54        | 0.2%     |            |         |       |
| 1                 | Z72.0 | Tobacco use                                        | 584       | 1.8%     | 0.017      | 0.019   |       |
| 2                 |       |                                                    | 506       | 1.6%     |            |         |       |
| 1                 | D13.6 | Benign neoplasm of pancreas                        | 10        | 0.0%     | 1          | <0.001  |       |
| 2                 |       |                                                    | 10        | 0.0%     |            |         |       |
| <b>Medication</b> |       |                                                    |           |          |            |         |       |
| Group             |       |                                                    | Mean ± SD | Patients | % of Group | P-Value | SMD   |
| 1                 | A10A  | INSULINS AND ANALOGUES                             |           | 14,044   | 43.5%      | 0.685   | 0.003 |
| 2                 |       |                                                    |           | 13,993   | 43.4%      |         |       |
| 1                 | A10B  | Sulfonylureas                                      |           | 5,422    | 16.8%      | 0.153   | 0.011 |
| 2                 | B     |                                                    |           | 5,287    | 16.4%      |         |       |
| 1                 | A10B  | Alpha glucosidase inhibitors                       |           | 121      | 0.4%       | 0.647   | 0.004 |
| 2                 | F     |                                                    |           | 114      | 0.4%       |         |       |
| 1                 | A10B  | Thiazolidinediones                                 |           | 1,930    | 6.0%       | 0.894   | 0.001 |
| 2                 | G     |                                                    |           | 1,922    | 6.0%       |         |       |
| 1                 | A10B  | Dipeptidyl peptidase 4 (DPP-4) inhibitors          |           | 3,470    | 10.8%      | 0.188   | 0.010 |
| 2                 | H     |                                                    |           | 3,367    | 10.4%      |         |       |
| 1                 | A10B  | Sodium-glucose co-transporter 2 (SGLT2) inhibitors |           | 1,756    | 5.4%       | 0.007   | 0.021 |
| 2                 | K     |                                                    |           | 1,603    | 5.0%       |         |       |
| 1                 | A10B  | Other blood glucose lowering drugs, excl. insulins |           | 656      | 2.0%       | 0.594   | 0.004 |
| 2                 | X     |                                                    |           | 637      | 2.0%       |         |       |

eTable 24. Characteristics of the GLP-1RA/no metformin group and metformin/no GLP-1RA group before and after matched for covariates related to thyroid cancer for the study populations of patients with T2D and no history of any OAC

| <b>Group 1 (N = 32,365) and group 2 (N = 856,160) characteristics before propensity score matching</b> |        |                                           |               |            |         |       |       |
|--------------------------------------------------------------------------------------------------------|--------|-------------------------------------------|---------------|------------|---------|-------|-------|
| <b>Demographics</b>                                                                                    |        |                                           |               |            |         |       |       |
| Group                                                                                                  |        | Mean ± SD                                 | Patients      | % of Group | P-Value | SMD   |       |
| 1                                                                                                      | AI     | Age at Index                              | 59.0 +/- 12.4 | 32,365     | 100%    | <0.00 | 0.080 |
| 2                                                                                                      |        |                                           | 60.1 +/- 14.0 | 856,160    | 100%    | 1     |       |
| 1                                                                                                      | 2106-3 | White                                     |               | 21,231     | 65.6%   | <0.00 | 0.111 |
| 2                                                                                                      |        |                                           |               | 515,868    | 60.3%   | 1     |       |
| 1                                                                                                      | 1002-5 | American Indian or Alaska Native          |               | 98         | 0.3%    | 0.092 | 0.010 |
| 2                                                                                                      |        |                                           |               | 3,080      | 0.4%    |       |       |
| 1                                                                                                      | UNK    | Unknown Race                              |               | 4,272      | 13.2%   | <0.00 | 0.021 |
| 2                                                                                                      |        |                                           |               | 119,036    | 13.9%   | 1     |       |
| 1                                                                                                      | F      | Female                                    |               | 17,278     | 53.4%   | <0.00 | 0.134 |
| 2                                                                                                      |        |                                           |               | 399,923    | 46.7%   | 1     |       |
| 1                                                                                                      | 2076-8 | Native Hawaiian or Other Pacific Islander |               | 172        | 0.5%    | 0.001 | 0.020 |
| 2                                                                                                      |        |                                           |               | 5,884      | 0.7%    |       |       |
| 1                                                                                                      | UN     | Unknown Gender                            |               | 1,670      | 5.2%    | <0.00 | 0.152 |
| 2                                                                                                      |        |                                           |               | 19,592     | 2.3%    | 1     |       |
| 1                                                                                                      | 2186-5 | Not Hispanic or Latino                    |               | 22,299     | 68.9%   | <0.00 | 0.151 |
| 2                                                                                                      |        |                                           |               | 528,686    | 61.8%   | 1     |       |
| 1                                                                                                      | 2135-2 | Hispanic or Latino                        |               | 2,660      | 8.2%    | <0.00 | 0.084 |
| 2                                                                                                      |        |                                           |               | 91,303     | 10.7%   | 1     |       |
| 1                                                                                                      | 2054-5 | Black or African American                 |               | 5,107      | 15.8%   | <0.00 | 0.021 |
| 2                                                                                                      |        |                                           |               | 141,606    | 16.5%   | 1     |       |
| 1                                                                                                      | M      | Male                                      |               | 13,417     | 41.5%   | <0.00 | 0.192 |
| 2                                                                                                      |        |                                           |               | 436,645    | 51.0%   | 1     |       |
| 1                                                                                                      | 2028-9 | Asian                                     |               | 681        | 2.1%    | <0.00 | 0.118 |
| 2                                                                                                      |        |                                           |               | 35,540     | 4.2%    | 1     |       |
| <b>Diagnosis</b>                                                                                       |        |                                           |               |            |         |       |       |
| Group                                                                                                  |        | Mean ± SD                                 | Patients      | % of Group | P-Value | SMD   |       |
| 1                                                                                                      | Z55-   | Persons with potential health             |               | 422        | 1.3%    | 0.107 | 0.009 |
| 2                                                                                                      | Z65    | hazards related to socioeconomic and      |               | 10,310     | 1.2%    |       |       |

|   |        | psychosocial<br>circumstances                         |         |       |       |       |
|---|--------|-------------------------------------------------------|---------|-------|-------|-------|
| 1 | E66    | Overweight and obesity                                | 11,418  | 35.3% | <0.00 | 0.411 |
| 2 |        |                                                       | 149,974 | 17.5% | 1     |       |
| 1 | Z68.3  | Body mass index [BMI] 30-39, adult                    | 3,285   | 10.1% | <0.00 | 0.249 |
| 2 |        |                                                       | 32,977  | 3.9%  | 1     |       |
| 1 | Z68.4  | Body mass index [BMI] 40 or greater, adult            | 3,012   | 9.3%  | <0.00 | 0.278 |
| 2 |        |                                                       | 23,535  | 2.7%  | 1     |       |
| 1 | Z68.25 | Body mass index [BMI] 25.0-25.9, adult                | 119     | 0.4%  | 0.001 | 0.018 |
| 2 |        |                                                       | 2,293   | 0.3%  |       |       |
| 1 | Z68.26 | Body mass index [BMI] 26.0-26.9, adult                | 150     | 0.5%  | <0.00 | 0.029 |
| 2 |        |                                                       | 2,433   | 0.3%  | 1     |       |
| 1 | Z68.27 | Body mass index [BMI] 27.0-27.9, adult                | 209     | 0.6%  | <0.00 | 0.043 |
| 2 |        |                                                       | 2,942   | 0.3%  | 1     |       |
| 1 | Z68.28 | Body mass index [BMI] 28.0-28.9, adult                | 264     | 0.8%  | <0.00 | 0.055 |
| 2 |        |                                                       | 3,317   | 0.4%  | 1     |       |
| 1 | Z68.29 | Body mass index [BMI] 29.0-29.9, adult                | 299     | 0.9%  | <0.00 | 0.059 |
| 2 |        |                                                       | 3,753   | 0.4%  | 1     |       |
| 1 | Z80    | Family history of primary malignant neoplasm          | 1,222   | 3.8%  | <0.00 | 0.114 |
| 2 |        |                                                       | 16,133  | 1.9%  | 1     |       |
| 1 | Z15.0  | Genetic susceptibility to malignant neoplasm          | 18      | 0.1%  | <0.00 | 0.021 |
| 2 |        |                                                       | 140     | 0.0%  | 1     |       |
| 1 | Z12    | Encounter for screening for malignant neoplasms       | 6,223   | 19.2% | <0.00 | 0.157 |
| 2 |        |                                                       | 114,996 | 13.4% | 1     |       |
| 1 | Z85    | Personal history of malignant neoplasm                | 1,111   | 3.4%  | <0.00 | 0.042 |
| 2 |        |                                                       | 23,231  | 2.7%  | 1     |       |
| 1 | Z98.84 | Bariatric surgery status                              | 534     | 1.6%  | <0.00 | 0.131 |
| 2 |        |                                                       | 2,989   | 0.3%  | 1     |       |
| 1 | E66.0  | Obesity due to excess calories                        | 5,910   | 18.3% | <0.00 | 0.361 |
| 2 |        |                                                       | 56,178  | 6.6%  | 1     |       |
| 1 | E66.2  | Morbid (severe) obesity with alveolar hypoventilation | 230     | 0.7%  | <0.00 | 0.069 |
| 2 |        |                                                       | 2,051   | 0.2%  | 1     |       |

|                   |       |                                                                                                                                                 |           |          |            |         |       |
|-------------------|-------|-------------------------------------------------------------------------------------------------------------------------------------------------|-----------|----------|------------|---------|-------|
| 1                 | E66.3 | Overweight                                                                                                                                      | 535       | 1.7%     | <0.00      | 0.066   |       |
| 2                 |       |                                                                                                                                                 | 7,794     | 0.9%     | 1          |         |       |
| 1                 | E66.8 | Other obesity                                                                                                                                   | 193       | 0.6%     | <0.00      | 0.078   |       |
| 2                 |       |                                                                                                                                                 | 1,084     | 0.1%     | 1          |         |       |
| 1                 | E66.9 | Obesity, unspecified                                                                                                                            | 8,150     | 25.2%    | <0.00      | 0.307   |       |
| 2                 |       |                                                                                                                                                 | 113,380   | 13.2%    | 1          |         |       |
| 1                 | D34   | Benign neoplasm of thyroid gland                                                                                                                | 46        | 0.1%     | <0.00      | 0.017   |       |
| 2                 |       |                                                                                                                                                 | 715       | 0.1%     | 1          |         |       |
| <b>Procedure</b>  |       |                                                                                                                                                 |           |          |            |         |       |
| Group             |       |                                                                                                                                                 | Mean ± SD | Patients | % of Group | P-Value | SMD   |
| 1                 | 10278 | Hereditary neuroendocrine tumor disorders (eg, medullary thyroid carcinoma, parathyroid carcinoma, malignant pheochromocytoma or paraganglioma) |           | 0        | 0%         | --      | --    |
| 2                 | 53    |                                                                                                                                                 |           | 0        | 0%         |         |       |
| 1                 | 1001  | Radiation                                                                                                                                       |           | 114      | 0.4%       | <0.00   | 0.027 |
| 2                 |       |                                                                                                                                                 |           | 4,550    | 0.5%       | 1       |       |
| <b>Medication</b> |       |                                                                                                                                                 |           |          |            |         |       |
| Group             |       |                                                                                                                                                 | Mean ± SD | Patients | % of Group | P-Value | SMD   |
| 1                 | A10A  | INSULINS AND ANALOGUES                                                                                                                          |           | 14,131   | 43.7%      | <0.00   | 0.560 |
| 2                 |       |                                                                                                                                                 |           | 159,901  | 18.7%      | 1       |       |
| 1                 | A10B  | Sulfonylureas                                                                                                                                   |           | 5,464    | 16.9%      | <0.00   | 0.269 |
| 2                 | B     |                                                                                                                                                 |           | 69,045   | 8.1%       | 1       |       |
| 1                 | A10B  | Alpha glucosidase inhibitors                                                                                                                    |           | 124      | 0.4%       | <0.00   | 0.057 |
| 2                 | F     |                                                                                                                                                 |           | 876      | 0.1%       | 1       |       |
| 1                 | A10B  | Thiazolidinediones                                                                                                                              |           | 1,960    | 6.1%       | <0.00   | 0.183 |
| 2                 | G     |                                                                                                                                                 |           | 20,400   | 2.4%       | 1       |       |
| 1                 | A10B  | Dipeptidyl peptidase 4 (DPP-4) inhibitors                                                                                                       |           | 3,547    | 11.0%      | <0.00   | 0.370 |
| 2                 | H     |                                                                                                                                                 |           | 17,113   | 2.0%       | 1       |       |
| 1                 | A10B  | Sodium-glucose co-transporter 2 (SGLT2) inhibitors                                                                                              |           | 1,839    | 5.7%       | <0.00   | 0.312 |
| 2                 | K     |                                                                                                                                                 |           | 3,371    | 0.4%       | 1       |       |
| 1                 | A10B  | Other blood glucose lowering drugs, excl. insulins                                                                                              |           | 672      | 2.1%       | <0.00   | 0.146 |
| 2                 | X     |                                                                                                                                                 |           | 3,839    | 0.4%       | 1       |       |

**Group 1 (N = 32,259) and group 2 (N = 32,259) characteristics after propensity score matching**

**Demographics**

| Group |        | Mean ± SD                                 | Patients | % of Group | P-Value | SMD   |
|-------|--------|-------------------------------------------|----------|------------|---------|-------|
| 1     | AI     | Age at Index                              | 32,259   | 100%       | 0.810   | 0.002 |
| 2     |        |                                           | 32,259   | 100%       |         |       |
| 1     | 2106-3 | White                                     | 21,154   | 65.6%      | <0.001  | 0.033 |
| 2     |        |                                           | 21,663   | 67.2%      |         |       |
| 1     | 1002-5 | American Indian or Alaska Native          | 98       | 0.3%       | 0.463   | 0.006 |
| 2     |        |                                           | 88       | 0.3%       |         |       |
| 1     | UNK    | Unknown Race                              | 4,259    | 13.2%      | 0.375   | 0.007 |
| 2     |        |                                           | 4,183    | 13.0%      |         |       |
| 1     | F      | Female                                    | 17,209   | 53.3%      | 0.340   | 0.008 |
| 2     |        |                                           | 17,330   | 53.7%      |         |       |
| 1     | 2076-8 | Native Hawaiian or Other Pacific Islander | 171      | 0.5%       | 0.078   | 0.014 |
| 2     |        |                                           | 140      | 0.4%       |         |       |
| 1     | UN     | Unknown Gender                            | 1,659    | 5.1%       | 0.085   | 0.014 |
| 2     |        |                                           | 1,757    | 5.4%       |         |       |
| 1     | 2186-5 | Not Hispanic or Latino                    | 22,219   | 68.9%      | <0.001  | 0.028 |
| 2     |        |                                           | 22,637   | 70.2%      |         |       |
| 1     | 2135-2 | Hispanic or Latino                        | 2,651    | 8.2%       | 0.001   | 0.025 |
| 2     |        |                                           | 2,430    | 7.5%       |         |       |
| 1     | 2054-5 | Black or African American                 | 5,093    | 15.8%      | 0.016   | 0.019 |
| 2     |        |                                           | 4,871    | 15.1%      |         |       |
| 1     | M      | Male                                      | 13,391   | 41.5%      | 0.080   | 0.014 |
| 2     |        |                                           | 13,172   | 40.8%      |         |       |
| 1     | 2028-9 | Asian                                     | 681      | 2.1%       | 0.014   | 0.019 |
| 2     |        |                                           | 594      | 1.8%       |         |       |

**Diagnosis**

| Group |         | Mean ± SD                                                                                     | Patients | % of Group | P-Value | SMD   |
|-------|---------|-----------------------------------------------------------------------------------------------|----------|------------|---------|-------|
| 1     | Z55-Z65 | Persons with potential health hazards related to socioeconomic and psychosocial circumstances | 420      | 1.3%       | 0.001   | 0.027 |
| 2     |         |                                                                                               | 328      | 1.0%       |         |       |
| 1     | E66     | Overweight and obesity                                                                        | 11,340   | 35.2%      | 0.279   | 0.009 |
| 2     |         |                                                                                               | 11,209   | 34.7%      |         |       |



|   |        |                                                             |       |       |            |       |
|---|--------|-------------------------------------------------------------|-------|-------|------------|-------|
| 1 | Z68.3  | Body mass index<br>[BMI] 30-39, adult                       | 3,247 | 10.1% | 0.269      | 0.009 |
| 2 |        |                                                             | 3,163 | 9.8%  |            |       |
| 1 | Z68.4  | Body mass index<br>[BMI] 40 or greater,<br>adult            | 2,969 | 9.2%  | 0.076      | 0.014 |
| 2 |        |                                                             | 2,840 | 8.8%  |            |       |
| 1 | Z68.25 | Body mass index<br>[BMI] 25.0-25.9,<br>adult                | 118   | 0.4%  | 0.173      | 0.011 |
| 2 |        |                                                             | 98    | 0.3%  |            |       |
| 1 | Z68.26 | Body mass index<br>[BMI] 26.0-26.9,<br>adult                | 149   | 0.5%  | 0.022      | 0.018 |
| 2 |        |                                                             | 112   | 0.3%  |            |       |
| 1 | Z68.27 | Body mass index<br>[BMI] 27.0-27.9,<br>adult                | 207   | 0.6%  | 0.029      | 0.017 |
| 2 |        |                                                             | 165   | 0.5%  |            |       |
| 1 | Z68.28 | Body mass index<br>[BMI] 28.0-28.9,<br>adult                | 261   | 0.8%  | 0.160      | 0.011 |
| 2 |        |                                                             | 230   | 0.7%  |            |       |
| 1 | Z68.29 | Body mass index<br>[BMI] 29.0-29.9,<br>adult                | 296   | 0.9%  | 0.653      | 0.004 |
| 2 |        |                                                             | 307   | 1.0%  |            |       |
| 1 | Z80    | Family history of<br>primary malignant<br>neoplasm          | 1,204 | 3.7%  | 0.024      | 0.018 |
| 2 |        |                                                             | 1,098 | 3.4%  |            |       |
| 1 | Z15.0  | Genetic<br>susceptibility to<br>malignant neoplasm          | 18    | 0.1%  | 0.130      | 0.012 |
| 2 |        |                                                             | 10    | 0.0%  |            |       |
| 1 | Z12    | Encounter for<br>screening for<br>malignant neoplasms       | 6,173 | 19.1% | <0.00<br>1 | 0.039 |
| 2 |        |                                                             | 5,681 | 17.6% |            |       |
| 1 | Z85    | Personal history of<br>malignant neoplasm                   | 1,106 | 3.4%  | 0.212      | 0.010 |
| 2 |        |                                                             | 1,049 | 3.3%  |            |       |
| 1 | Z98.84 | Bariatric surgery<br>status                                 | 518   | 1.6%  | 0.659      | 0.003 |
| 2 |        |                                                             | 504   | 1.6%  |            |       |
| 1 | E66.0  | Obesity due to<br>excess calories                           | 5,849 | 18.1% | 0.340      | 0.008 |
| 2 |        |                                                             | 5,756 | 17.8% |            |       |
| 1 | E66.2  | Morbid (severe)<br>obesity with alveolar<br>hypoventilation | 228   | 0.7%  | 0.055      | 0.015 |
| 2 |        |                                                             | 189   | 0.6%  |            |       |
| 1 | E66.3  | Overweight                                                  | 532   | 1.6%  | 0.008      | 0.021 |
| 2 |        |                                                             | 450   | 1.4%  |            |       |
| 1 | E66.8  | Other obesity                                               | 191   | 0.6%  | 0.640      | 0.004 |
| 2 |        |                                                             | 182   | 0.6%  |            |       |

|                   |       |                                                                                                                                                 |           |          |            |         |       |
|-------------------|-------|-------------------------------------------------------------------------------------------------------------------------------------------------|-----------|----------|------------|---------|-------|
| 1                 | E66.9 | Obesity, unspecified                                                                                                                            | 8,095     | 25.1%    | 0.111      | 0.013   |       |
| 2                 |       |                                                                                                                                                 | 7,920     | 24.6%    |            |         |       |
| 1                 | D34   | Benign neoplasm of thyroid gland                                                                                                                | 45        | 0.1%     | 0.216      | 0.010   |       |
| 2                 |       |                                                                                                                                                 | 34        | 0.1%     |            |         |       |
| <b>Procedure</b>  |       |                                                                                                                                                 |           |          |            |         |       |
| Group             |       |                                                                                                                                                 | Mean ± SD | Patients | % of Group | P-Value | SMD   |
| 1                 | 10278 | Hereditary neuroendocrine tumor disorders (eg, medullary thyroid carcinoma, parathyroid carcinoma, malignant pheochromocytoma or paraganglioma) |           | 0        | 0%         | --      | --    |
| 2                 | 53    |                                                                                                                                                 |           | 0        | 0%         |         |       |
| 1                 | 1001  | Radiation                                                                                                                                       |           | 114      | 0.4%       | 0.213   | 0.010 |
| 2                 |       |                                                                                                                                                 |           | 96       | 0.3%       |         |       |
| <b>Medication</b> |       |                                                                                                                                                 |           |          |            |         |       |
| Group             |       |                                                                                                                                                 | Mean ± SD | Patients | % of Group | P-Value | SMD   |
| 1                 | A10A  | INSULINS AND ANALOGUES                                                                                                                          |           | 14,033   | 43.5%      | 0.515   | 0.005 |
| 2                 |       |                                                                                                                                                 |           | 13,951   | 43.2%      |         |       |
| 1                 | A10B  | Sulfonylureas                                                                                                                                   |           | 5,417    | 16.8%      | 0.422   | 0.006 |
| 2                 | B     |                                                                                                                                                 |           | 5,341    | 16.6%      |         |       |
| 1                 | A10B  | Alpha glucosidase inhibitors                                                                                                                    |           | 123      | 0.4%       | 0.514   | 0.005 |
| 2                 | F     |                                                                                                                                                 |           | 113      | 0.4%       |         |       |
| 1                 | A10B  | Thiazolidinediones                                                                                                                              |           | 1,926    | 6.0%       | 0.403   | 0.007 |
| 2                 | G     |                                                                                                                                                 |           | 1,876    | 5.8%       |         |       |
| 1                 | A10B  | Dipeptidyl peptidase 4 (DPP-4) inhibitors                                                                                                       |           | 3,469    | 10.8%      | 0.639   | 0.004 |
| 2                 | H     |                                                                                                                                                 |           | 3,506    | 10.9%      |         |       |
| 1                 | A10B  | Sodium-glucose co-transporter 2 (SGLT2) inhibitors                                                                                              |           | 1,740    | 5.4%       | 0.080   | 0.014 |
| 2                 | K     |                                                                                                                                                 |           | 1,641    | 5.1%       |         |       |
| 1                 | A10B  | Other blood glucose lowering drugs, excl. insulins                                                                                              |           | 654      | 2.0%       | 0.463   | 0.006 |
| 2                 | X     |                                                                                                                                                 |           | 628      | 1.9%       |         |       |

eTable 25. Characteristics of the GLP-1RA/no metformin group and metformin/no GLP-1RA group before and after matched for covariates related to meningioma for the study populations of patients with T2D and no history of any OAC

| <b>Group 1 (N = 32,365) and group 2 (N = 856,160) characteristics before propensity score matching</b> |        |                                           |               |            |         |        |       |
|--------------------------------------------------------------------------------------------------------|--------|-------------------------------------------|---------------|------------|---------|--------|-------|
| <b>Demographics</b>                                                                                    |        |                                           |               |            |         |        |       |
| Group                                                                                                  |        | Mean ± SD                                 | Patients      | % of Group | P-Value | SMD    |       |
| 1                                                                                                      | AI     | Age at Index                              | 59.0 +/- 12.4 | 32,365     | 100%    | <0.001 | 0.080 |
| 2                                                                                                      |        |                                           | 60.1 +/- 14.0 | 856,160    | 100%    |        |       |
| 1                                                                                                      | 2106-3 | White                                     |               | 21,231     | 65.6%   | <0.001 | 0.111 |
| 2                                                                                                      |        |                                           |               | 515,868    | 60.3%   |        |       |
| 1                                                                                                      | 1002-5 | American Indian or Alaska Native          |               | 98         | 0.3%    | 0.092  | 0.010 |
| 2                                                                                                      |        |                                           |               | 3,080      | 0.4%    |        |       |
| 1                                                                                                      | UNK    | Unknown Race                              |               | 4,272      | 13.2%   | <0.001 | 0.021 |
| 2                                                                                                      |        |                                           |               | 119,036    | 13.9%   |        |       |
| 1                                                                                                      | F      | Female                                    |               | 17,278     | 53.4%   | <0.001 | 0.134 |
| 2                                                                                                      |        |                                           |               | 399,923    | 46.7%   |        |       |
| 1                                                                                                      | 2076-8 | Native Hawaiian or Other Pacific Islander |               | 172        | 0.5%    | 0.001  | 0.020 |
| 2                                                                                                      |        |                                           |               | 5,884      | 0.7%    |        |       |
| 1                                                                                                      | UN     | Unknown Gender                            |               | 1,670      | 5.2%    | <0.001 | 0.152 |
| 2                                                                                                      |        |                                           |               | 19,592     | 2.3%    |        |       |
| 1                                                                                                      | 2186-5 | Not Hispanic or Latino                    |               | 22,299     | 68.9%   | <0.001 | 0.151 |
| 2                                                                                                      |        |                                           |               | 528,686    | 61.8%   |        |       |
| 1                                                                                                      | 2135-2 | Hispanic or Latino                        |               | 2,660      | 8.2%    | <0.001 | 0.084 |
| 2                                                                                                      |        |                                           |               | 91,303     | 10.7%   |        |       |
| 1                                                                                                      | 2054-5 | Black or African American                 |               | 5,107      | 15.8%   | <0.001 | 0.021 |
| 2                                                                                                      |        |                                           |               | 141,606    | 16.5%   |        |       |
| 1                                                                                                      | M      | Male                                      |               | 13,417     | 41.5%   | <0.001 | 0.192 |
| 2                                                                                                      |        |                                           |               | 436,645    | 51.0%   |        |       |
| 1                                                                                                      | 2028-9 | Asian                                     |               | 681        | 2.1%    | <0.001 | 0.118 |
| 2                                                                                                      |        |                                           |               | 35,540     | 4.2%    |        |       |
| <b>Diagnosis</b>                                                                                       |        |                                           |               |            |         |        |       |
| Group                                                                                                  |        | Mean ± SD                                 | Patients      | % of Group | P-Value | SMD    |       |
| 1                                                                                                      | Z55-   | Persons with potential health             |               | 422        | 1.3%    | 0.107  | 0.009 |
| 2                                                                                                      | Z65    | hazards related to socioeconomic and      |               | 10,310     | 1.2%    |        |       |

|   |        | psychosocial<br>circumstances                               |         |       |       |       |
|---|--------|-------------------------------------------------------------|---------|-------|-------|-------|
| 1 | E66    | Overweight and<br>obesity                                   | 11,418  | 35.3% | <0.00 | 0.411 |
| 2 |        |                                                             | 149,974 | 17.5% | 1     |       |
| 1 | Z68.3  | Body mass index<br>[BMI] 30-39, adult                       | 3,285   | 10.1% | <0.00 | 0.249 |
| 2 |        |                                                             | 32,977  | 3.9%  | 1     |       |
| 1 | Z68.4  | Body mass index<br>[BMI] 40 or greater,<br>adult            | 3,012   | 9.3%  | <0.00 | 0.278 |
| 2 |        |                                                             | 23,535  | 2.7%  | 1     |       |
| 1 | Z68.25 | Body mass index<br>[BMI] 25.0-25.9,<br>adult                | 119     | 0.4%  | 0.001 | 0.018 |
| 2 |        |                                                             | 2,293   | 0.3%  |       |       |
| 1 | Z68.26 | Body mass index<br>[BMI] 26.0-26.9,<br>adult                | 150     | 0.5%  | <0.00 | 0.029 |
| 2 |        |                                                             | 2,433   | 0.3%  | 1     |       |
| 1 | Z68.27 | Body mass index<br>[BMI] 27.0-27.9,<br>adult                | 209     | 0.6%  | <0.00 | 0.043 |
| 2 |        |                                                             | 2,942   | 0.3%  | 1     |       |
| 1 | Z68.28 | Body mass index<br>[BMI] 28.0-28.9,<br>adult                | 264     | 0.8%  | <0.00 | 0.055 |
| 2 |        |                                                             | 3,317   | 0.4%  | 1     |       |
| 1 | Z68.29 | Body mass index<br>[BMI] 29.0-29.9,<br>adult                | 299     | 0.9%  | <0.00 | 0.059 |
| 2 |        |                                                             | 3,753   | 0.4%  | 1     |       |
| 1 | Z80    | Family history of<br>primary malignant<br>neoplasm          | 1,222   | 3.8%  | <0.00 | 0.114 |
| 2 |        |                                                             | 16,133  | 1.9%  | 1     |       |
| 1 | Z15.0  | Genetic<br>susceptibility to<br>malignant neoplasm          | 18      | 0.1%  | <0.00 | 0.021 |
| 2 |        |                                                             | 140     | 0.0%  | 1     |       |
| 1 | Z12    | Encounter for<br>screening for<br>malignant neoplasms       | 6,223   | 19.2% | <0.00 | 0.157 |
| 2 |        |                                                             | 114,996 | 13.4% | 1     |       |
| 1 | Z85    | Personal history of<br>malignant neoplasm                   | 1,111   | 3.4%  | <0.00 | 0.042 |
| 2 |        |                                                             | 23,231  | 2.7%  | 1     |       |
| 1 | Z98.84 | Bariatric surgery<br>status                                 | 534     | 1.6%  | <0.00 | 0.131 |
| 2 |        |                                                             | 2,989   | 0.3%  | 1     |       |
| 1 | E66.0  | Obesity due to<br>excess calories                           | 5,910   | 18.3% | <0.00 | 0.361 |
| 2 |        |                                                             | 56,178  | 6.6%  | 1     |       |
| 1 | E66.2  | Morbid (severe)<br>obesity with alveolar<br>hypoventilation | 230     | 0.7%  | <0.00 | 0.069 |
| 2 |        |                                                             | 2,051   | 0.2%  | 1     |       |

|   |        |                      |         |       |       |       |
|---|--------|----------------------|---------|-------|-------|-------|
| 1 | E66.3  | Overweight           | 535     | 1.7%  | <0.00 | 0.066 |
| 2 |        |                      | 7,794   | 0.9%  | 1     |       |
| 1 | E66.8  | Other obesity        | 193     | 0.6%  | <0.00 | 0.078 |
| 2 |        |                      | 1,084   | 0.1%  | 1     |       |
| 1 | E66.9  | Obesity, unspecified | 8,150   | 25.2% | <0.00 | 0.307 |
| 2 |        |                      | 113,380 | 13.2% | 1     |       |
| 1 | Z79.89 | Hormone              | 94      | 0.3%  | <0.00 | 0.027 |
| 2 | 0      | replacement therapy  | 1,381   | 0.2%  | 1     |       |
| 1 | Z92.23 | Personal history of  | 10      | 0.0%  | 0.011 | 0.012 |
| 2 |        | estrogen therapy     | 117     | 0.0%  |       |       |
| 1 | D32    | Benign neoplasm of   | 84      | 0.3%  | 0.573 | 0.003 |
| 2 |        | meninges             | 2,087   | 0.2%  |       |       |
| 1 | S00-   | Injuries to the head | 1,546   | 4.8%  | 0.333 | 0.006 |
| 2 | S09    |                      | 41,909  | 4.9%  |       |       |
| 1 | Z80.3  | Family history of    | 438     | 1.4%  | <0.00 | 0.073 |
| 2 |        | malignant neoplasm   | 5,375   | 0.6%  | 1     |       |
|   |        | of breast            |         |       |       |       |

#### Procedure

| Group | Mean ± SD | Patients | % of Group | P-Value | SMD   |
|-------|-----------|----------|------------|---------|-------|
| 1     |           | 114      | 0.4%       | <0.00   | 0.027 |
| 2     | 1001      | 4,550    | 0.5%       | 1       |       |
|       |           |          |            |         |       |

#### Medication

| Group | Mean ± SD | Patients              | % of Group | P-Value | SMD   |       |
|-------|-----------|-----------------------|------------|---------|-------|-------|
| 1     | A10A      | INSULINS AND          | 14,131     | 43.7%   | <0.00 | 0.560 |
| 2     |           | ANALOGUES             | 159,901    | 18.7%   | 1     |       |
| 1     | A10B      | Sulfonylureas         | 5,464      | 16.9%   | <0.00 | 0.269 |
| 2     | B         |                       | 69,045     | 8.1%    | 1     |       |
| 1     | A10B      | Alpha glucosidase     | 124        | 0.4%    | <0.00 | 0.057 |
| 2     | F         | inhibitors            | 876        | 0.1%    | 1     |       |
| 1     | A10B      | Thiazolidinediones    | 1,960      | 6.1%    | <0.00 | 0.183 |
| 2     | G         |                       | 20,400     | 2.4%    | 1     |       |
| 1     | A10B      | Dipeptidyl peptidase  | 3,547      | 11.0%   | <0.00 | 0.370 |
| 2     | H         | 4 (DPP-4) inhibitors  | 17,113     | 2.0%    | 1     |       |
| 1     | A10B      | Sodium-glucose co-    | 1,839      | 5.7%    | <0.00 | 0.312 |
| 2     | K         | transporter 2         | 3,371      | 0.4%    | 1     |       |
|       |           | (SGLT2) inhibitors    |            |         |       |       |
| 1     | A10B      | Other blood glucose   | 672        | 2.1%    | <0.00 | 0.146 |
| 2     | X         | lowering drugs, excl. | 3,839      | 0.4%    | 1     |       |
|       |           | insulins              |            |         |       |       |

|   |       |               |  |        |      |       |       |
|---|-------|---------------|--|--------|------|-------|-------|
| 1 | HS200 | CONTRACEPTIVE |  | 1,069  | 3.3% | <0.00 |       |
| 2 |       | S,SYSTEMIC    |  | 17,029 | 2.0% | 1     | 0.082 |

**Group 1 (N = 32,263) and group 2 (N = 32,263) characteristics after propensity score matching**

**Demographics**

| Group |        | Mean ± SD                                 | Patients | % of Group | P-Value | SMD   |
|-------|--------|-------------------------------------------|----------|------------|---------|-------|
| 1     | AI     | Age at Index                              | 32,263   | 100%       | 0.166   | 0.011 |
| 2     |        |                                           | 32,263   | 100%       |         |       |
| 1     | 2106-3 | White                                     | 21,158   | 65.6%      | <0.00   | 0.038 |
| 2     |        |                                           | 21,735   | 67.4%      | 1       |       |
| 1     | 1002-5 | American Indian or Alaska Native          | 98       | 0.3%       | 0.887   | 0.001 |
| 2     |        |                                           | 100      | 0.3%       |         |       |
| 1     | UNK    | Unknown Race                              | 4,255    | 13.2%      | 0.219   | 0.010 |
| 2     |        |                                           | 4,150    | 12.9%      |         |       |
| 1     | F      | Female                                    | 17,216   | 53.4%      | 0.116   | 0.012 |
| 2     |        |                                           | 17,415   | 54.0%      |         |       |
| 1     | 2076-8 | Native Hawaiian or Other Pacific Islander | 172      | 0.5%       | 0.265   | 0.009 |
| 2     |        |                                           | 152      | 0.5%       |         |       |
| 1     | UN     | Unknown Gender                            | 1,655    | 5.1%       | 0.163   | 0.011 |
| 2     |        |                                           | 1,734    | 5.4%       |         |       |
| 1     | 2186-5 | Not Hispanic or Latino                    | 22,224   | 68.9%      | 0.014   | 0.019 |
| 2     |        |                                           | 22,513   | 69.8%      |         |       |
| 1     | 2135-2 | Hispanic or Latino                        | 2,653    | 8.2%       | 0.002   | 0.024 |
| 2     |        |                                           | 2,442    | 7.6%       |         |       |
| 1     | 2054-5 | Black or African American                 | 5,095    | 15.8%      | 0.001   | 0.025 |
| 2     |        |                                           | 4,800    | 14.9%      |         |       |
| 1     | M      | Male                                      | 13,392   | 41.5%      | 0.026   | 0.018 |
| 2     |        |                                           | 13,114   | 40.6%      |         |       |
| 1     | 2028-9 | Asian                                     | 681      | 2.1%       | 0.003   | 0.024 |
| 2     |        |                                           | 576      | 1.8%       |         |       |

**Diagnosis**

| Group |      | Mean ± SD                                                                                     | Patients | % of Group | P-Value | SMD   |
|-------|------|-----------------------------------------------------------------------------------------------|----------|------------|---------|-------|
| 1     | Z55- | Persons with potential health hazards related to socioeconomic and psychosocial circumstances | 420      | 1.3%       | 0.086   | 0.014 |
| 2     | Z65  |                                                                                               | 372      | 1.2%       |         |       |

|   |        |                                                       |        |       |        |       |
|---|--------|-------------------------------------------------------|--------|-------|--------|-------|
| 1 | E66    | Overweight and obesity                                | 11,346 | 35.2% | 0.723  | 0.003 |
| 2 |        |                                                       | 11,303 | 35.0% |        |       |
| 1 | Z68.3  | Body mass index [BMI] 30-39, adult                    | 3,247  | 10.1% | 0.170  | 0.011 |
| 2 |        |                                                       | 3,143  | 9.7%  |        |       |
| 1 | Z68.4  | Body mass index [BMI] 40 or greater, adult            | 2,968  | 9.2%  | 0.557  | 0.005 |
| 2 |        |                                                       | 2,925  | 9.1%  |        |       |
| 1 | Z68.25 | Body mass index [BMI] 25.0-25.9, adult                | 118    | 0.4%  | 0.132  | 0.012 |
| 2 |        |                                                       | 96     | 0.3%  |        |       |
| 1 | Z68.26 | Body mass index [BMI] 26.0-26.9, adult                | 149    | 0.5%  | 0.005  | 0.022 |
| 2 |        |                                                       | 104    | 0.3%  |        |       |
| 1 | Z68.27 | Body mass index [BMI] 27.0-27.9, adult                | 208    | 0.6%  | 0.019  | 0.018 |
| 2 |        |                                                       | 163    | 0.5%  |        |       |
| 1 | Z68.28 | Body mass index [BMI] 28.0-28.9, adult                | 261    | 0.8%  | 0.061  | 0.015 |
| 2 |        |                                                       | 220    | 0.7%  |        |       |
| 1 | Z68.29 | Body mass index [BMI] 29.0-29.9, adult                | 297    | 0.9%  | 0.149  | 0.011 |
| 2 |        |                                                       | 263    | 0.8%  |        |       |
| 1 | Z80    | Family history of primary malignant neoplasm          | 1,206  | 3.7%  | 0.029  | 0.017 |
| 2 |        |                                                       | 1,103  | 3.4%  |        |       |
| 1 | Z15.0  | Genetic susceptibility to malignant neoplasm          | 18     | 0.1%  | 0.194  | 0.010 |
| 2 |        |                                                       | 11     | 0.0%  |        |       |
| 1 | Z12    | Encounter for screening for malignant neoplasms       | 6,176  | 19.1% | <0.001 | 0.050 |
| 2 |        |                                                       | 5,548  | 17.2% |        |       |
| 1 | Z85    | Personal history of malignant neoplasm                | 1,105  | 3.4%  | 0.294  | 0.008 |
| 2 |        |                                                       | 1,057  | 3.3%  |        |       |
| 1 | Z98.84 | Bariatric surgery status                              | 518    | 1.6%  | 0.197  | 0.010 |
| 2 |        |                                                       | 560    | 1.7%  |        |       |
| 1 | E66.0  | Obesity due to excess calories                        | 5,856  | 18.2% | 0.328  | 0.008 |
| 2 |        |                                                       | 5,952  | 18.4% |        |       |
| 1 | E66.2  | Morbid (severe) obesity with alveolar hypoventilation | 228    | 0.7%  | 0.289  | 0.008 |
| 2 |        |                                                       | 206    | 0.6%  |        |       |
| 1 | E66.3  | Overweight                                            | 532    | 1.6%  | 0.014  | 0.019 |
| 2 |        |                                                       | 455    | 1.4%  |        |       |

|   |        |                              |       |       |        |        |
|---|--------|------------------------------|-------|-------|--------|--------|
| 1 | E66.8  | Other obesity                | 191   | 0.6%  | 0.464  | 0.006  |
| 2 |        |                              | 177   | 0.5%  |        |        |
| 1 | E66.9  | Obesity, unspecified         | 8,098 | 25.1% | 0.330  | 0.008  |
| 2 |        |                              | 7,991 | 24.8% |        |        |
| 1 | Z79.89 | Hormone                      | 93    | 0.3%  | 0.071  | 0.014  |
| 2 | 0      | replacement therapy          | 70    | 0.2%  |        |        |
| 1 | Z92.23 | Personal history of          | 10    | 0.0%  | 1      | <0.001 |
| 2 |        | estrogen therapy             | 10    | 0.0%  |        |        |
| 1 | D32    | Benign neoplasm of           | 84    | 0.3%  | 0.336  | 0.008  |
| 2 |        | meninges                     | 72    | 0.2%  |        |        |
| 1 | S00-   | Injuries to the head         | 1,533 | 4.8%  | <0.001 | 0.031  |
| 2 | S09    |                              | 1,329 | 4.1%  |        |        |
| 1 | Z80.3  | Family history of            | 431   | 1.3%  | 0.312  | 0.008  |
| 2 |        | malignant neoplasm of breast | 402   | 1.2%  |        |        |

### Procedure

| Group | Mean ± SD | Patients | % of Group | P-Value | SMD   |
|-------|-----------|----------|------------|---------|-------|
| 1     |           | 114      | 0.4%       | 0.067   | 0.014 |
| 2     |           | 88       | 0.3%       |         |       |

### Medication

| Group | Mean ± SD | Patients | % of Group | P-Value | SMD   |
|-------|-----------|----------|------------|---------|-------|
| 1     | A10A      | 14,036   | 43.5%      | 0.221   | 0.010 |
| 2     |           | 13,882   | 43.0%      |         |       |
| 1     | A10B      | 5,418    | 16.8%      | 0.112   | 0.013 |
| 2     |           | B        | 5,268      |         |       |
| 1     | A10B      | 122      | 0.4%       | 0.416   | 0.006 |
| 2     |           | F        | 135        |         |       |
| 1     | A10B      | 1,933    | 6.0%       | 0.228   | 0.009 |
| 2     |           | G        | 1,861      |         |       |
| 1     | A10B      | 3,468    | 10.7%      | 0.693   | 0.003 |
| 2     |           | H        | 3,437      |         |       |
| 1     | A10B      | 1,745    | 5.4%       | 0.022   | 0.018 |
| 2     |           | K        | 1,616      |         |       |
| 1     | A10B      | 657      | 2.0%       | 0.234   | 0.009 |
| 2     |           | X        | 615        |         |       |
| 1     | HS200     | 1,058    | 3.3%       | 0.002   | 0.024 |
| 2     |           |          | 923        |         |       |



eTable 26. Characteristics of the GLP-1RA/no metformin group and metformin/no GLP-1RA group before and after matched for covariates related to multiple myeloma for the study populations of patients with T2D and no history of any OAC

**Group 1 (N = 32,365) and group 2 (N = 856,160) characteristics before propensity score matching**

**Demographics**

| Group  |                                                  | Mean ± SD                      | Patients          | % of Group     | P-Value    | SMD   |
|--------|--------------------------------------------------|--------------------------------|-------------------|----------------|------------|-------|
| 1<br>2 | AI Age at Index                                  | 59.0 +/- 12.4<br>60.1 +/- 14.0 | 32,365<br>856,160 | 100%<br>100%   | <0.00<br>1 | 0.080 |
| 1<br>2 | 2106-3 White                                     |                                | 21,231<br>515,868 | 65.6%<br>60.3% | <0.00<br>1 | 0.111 |
| 1<br>2 | 1002-5 American Indian or Alaska Native          |                                | 98<br>3,080       | 0.3%<br>0.4%   | 0.092      | 0.010 |
| 1<br>2 | UNK Unknown Race                                 |                                | 4,272<br>119,036  | 13.2%<br>13.9% | <0.00<br>1 | 0.021 |
| 1<br>2 | F Female                                         |                                | 17,278<br>399,923 | 53.4%<br>46.7% | <0.00<br>1 | 0.134 |
| 1<br>2 | 2076-8 Native Hawaiian or Other Pacific Islander |                                | 172<br>5,884      | 0.5%<br>0.7%   | 0.001      | 0.020 |
| 1<br>2 | UN Unknown Gender                                |                                | 1,670<br>19,592   | 5.2%<br>2.3%   | <0.00<br>1 | 0.152 |
| 1<br>2 | 2186-5 Not Hispanic or Latino                    |                                | 22,299<br>528,686 | 68.9%<br>61.8% | <0.00<br>1 | 0.151 |
| 1<br>2 | 2135-2 Hispanic or Latino                        |                                | 2,660<br>91,303   | 8.2%<br>10.7%  | <0.00<br>1 | 0.084 |
| 1<br>2 | 2054-5 Black or African American                 |                                | 5,107<br>141,606  | 15.8%<br>16.5% | <0.00<br>1 | 0.021 |
| 1<br>2 | M Male                                           |                                | 13,417<br>436,645 | 41.5%<br>51.0% | <0.00<br>1 | 0.192 |
| 1<br>2 | 2028-9 Asian                                     |                                | 681<br>35,540     | 2.1%<br>4.2%   | <0.00<br>1 | 0.118 |

**Diagnosis**

| Group  |                                                           | Mean ± SD | Patients      | % of Group   | P-Value | SMD   |
|--------|-----------------------------------------------------------|-----------|---------------|--------------|---------|-------|
| 1<br>2 | Z55- Z65 Persons with potential health hazards related to |           | 422<br>10,310 | 1.3%<br>1.2% | 0.107   | 0.009 |

|   |        | socioeconomic and psychosocial circumstances    |         |       |       |       |
|---|--------|-------------------------------------------------|---------|-------|-------|-------|
| 1 | E66    | Overweight and obesity                          | 11,418  | 35.3% | <0.00 | 0.411 |
| 2 |        |                                                 | 149,974 | 17.5% | 1     |       |
| 1 | Z68.3  | Body mass index [BMI] 30-39, adult              | 3,285   | 10.1% | <0.00 | 0.249 |
| 2 |        |                                                 | 32,977  | 3.9%  | 1     |       |
| 1 | Z68.4  | Body mass index [BMI] 40 or greater, adult      | 3,012   | 9.3%  | <0.00 | 0.278 |
| 2 |        |                                                 | 23,535  | 2.7%  | 1     |       |
| 1 | Z68.25 | Body mass index [BMI] 25.0-25.9, adult          | 119     | 0.4%  | 0.001 | 0.018 |
| 2 |        |                                                 | 2,293   | 0.3%  |       |       |
| 1 | Z68.26 | Body mass index [BMI] 26.0-26.9, adult          | 150     | 0.5%  | <0.00 | 0.029 |
| 2 |        |                                                 | 2,433   | 0.3%  | 1     |       |
| 1 | Z68.27 | Body mass index [BMI] 27.0-27.9, adult          | 209     | 0.6%  | <0.00 | 0.043 |
| 2 |        |                                                 | 2,942   | 0.3%  | 1     |       |
| 1 | Z68.28 | Body mass index [BMI] 28.0-28.9, adult          | 264     | 0.8%  | <0.00 | 0.055 |
| 2 |        |                                                 | 3,317   | 0.4%  | 1     |       |
| 1 | Z68.29 | Body mass index [BMI] 29.0-29.9, adult          | 299     | 0.9%  | <0.00 | 0.059 |
| 2 |        |                                                 | 3,753   | 0.4%  | 1     |       |
| 1 | Z80    | Family history of primary malignant neoplasm    | 1,222   | 3.8%  | <0.00 | 0.114 |
| 2 |        |                                                 | 16,133  | 1.9%  | 1     |       |
| 1 | Z15.0  | Genetic susceptibility to malignant neoplasm    | 18      | 0.1%  | <0.00 | 0.021 |
| 2 |        |                                                 | 140     | 0.0%  | 1     |       |
| 1 | Z12    | Encounter for screening for malignant neoplasms | 6,223   | 19.2% | <0.00 | 0.157 |
| 2 |        |                                                 | 114,996 | 13.4% | 1     |       |
| 1 | Z85    | Personal history of malignant neoplasm          | 1,111   | 3.4%  | <0.00 | 0.042 |
| 2 |        |                                                 | 23,231  | 2.7%  | 1     |       |
| 1 | Z98.84 | Bariatric surgery status                        | 534     | 1.6%  | <0.00 | 0.131 |
| 2 |        |                                                 | 2,989   | 0.3%  | 1     |       |
| 1 | E66.0  | Obesity due to excess calories                  | 5,910   | 18.3% | <0.00 | 0.361 |
| 2 |        |                                                 | 56,178  | 6.6%  | 1     |       |

|   |       |                                                                                            |         |       |       |        |
|---|-------|--------------------------------------------------------------------------------------------|---------|-------|-------|--------|
| 1 | E66.2 | Morbid (severe) obesity with alveolar hypoventilation                                      | 230     | 0.7%  | <0.00 | 0.069  |
| 2 |       |                                                                                            | 2,051   | 0.2%  | 1     |        |
| 1 | E66.3 | Overweight                                                                                 | 535     | 1.7%  | <0.00 | 0.066  |
| 2 |       |                                                                                            | 7,794   | 0.9%  | 1     |        |
| 1 | E66.8 | Other obesity                                                                              | 193     | 0.6%  | <0.00 | 0.078  |
| 2 |       |                                                                                            | 1,084   | 0.1%  | 1     |        |
| 1 | E66.9 | Obesity, unspecified                                                                       | 8,150   | 25.2% | <0.00 | 0.307  |
| 2 |       |                                                                                            | 113,380 | 13.2% | 1     |        |
| 1 | Z80.7 | Family history of other malignant neoplasms of lymphoid, hematopoietic and related tissues | 15      | 0.0%  | 0.010 | 0.012  |
| 2 |       |                                                                                            | 201     | 0.0%  |       |        |
| 1 | D47.2 | Monoclonal gammopathy                                                                      | 111     | 0.3%  | <0.00 | 0.037  |
| 2 |       |                                                                                            | 1,346   | 0.2%  | 1     |        |
| 1 | C90.3 | Solitary plasmacytoma                                                                      | 10      | 0.0%  | <0.00 | 0.021  |
| 2 |       |                                                                                            | 30      | 0.0%  | 1     |        |
| 1 | D45   | Polycythemia vera                                                                          | 67      | 0.2%  | 0.001 | 0.017  |
| 2 |       |                                                                                            | 1,167   | 0.1%  |       |        |
| 1 | D46   | Myelodysplastic syndromes                                                                  | 31      | 0.1%  | 0.952 | <0.001 |
| 2 |       |                                                                                            | 811     | 0.1%  |       |        |
| 1 | D47   | Other neoplasms of uncertain behavior of lymphoid, hematopoietic and related tissue        | 234     | 0.7%  | <0.00 | 0.027  |
| 2 |       |                                                                                            | 4,409   | 0.5%  | 1     |        |

### Medication

| Group |      | Mean ± SD                                 | Patients | % of Group | P-Value | SMD   |
|-------|------|-------------------------------------------|----------|------------|---------|-------|
| 1     | A10A | INSULINS AND ANALOGUES                    | 14,131   | 43.7%      | <0.00   | 0.560 |
| 2     |      |                                           | 159,901  | 18.7%      | 1       |       |
| 1     | A10B | Sulfonylureas                             | 5,464    | 16.9%      | <0.00   | 0.269 |
| 2     |      |                                           | B        | 69,045     | 8.1%    |       |
| 1     | A10B | Alpha glucosidase inhibitors              | 124      | 0.4%       | <0.00   | 0.057 |
| 2     |      |                                           | F        | 876        | 0.1%    |       |
| 1     | A10B | Thiazolidinediones                        | 1,960    | 6.1%       | <0.00   | 0.183 |
| 2     |      |                                           | G        | 20,400     | 2.4%    |       |
| 1     | A10B | Dipeptidyl peptidase 4 (DPP-4) inhibitors | 3,547    | 11.0%      | <0.00   | 0.370 |
| 2     |      |                                           | H        | 17,113     | 2.0%    |       |

|   |      |                                                    |       |      |        |       |
|---|------|----------------------------------------------------|-------|------|--------|-------|
| 1 | A10B | Sodium-glucose co-transporter 2 (SGLT2) inhibitors | 1,839 | 5.7% | <0.001 | 0.312 |
| 2 | K    |                                                    | 3,371 | 0.4% |        |       |
| 1 | A10B | Other blood glucose lowering drugs, excl. insulins | 672   | 2.1% | <0.001 | 0.146 |
| 2 | X    |                                                    | 3,839 | 0.4% |        |       |

**Group 1 (N = 32,256) and group 2 (N = 32,256) characteristics after propensity score matching**

**Demographics**

| Group |        | Mean ± SD                                 | Patients      | % of Group | P-Value | SMD    |       |
|-------|--------|-------------------------------------------|---------------|------------|---------|--------|-------|
| 1     | AI     | Age at Index                              | 59.0 +/- 12.4 | 32,256     | 100%    | 0.248  | 0.009 |
| 2     |        |                                           | 58.9 +/- 13.1 | 32,256     | 100%    |        |       |
| 1     | 2106-3 | White                                     | 21,155        | 65.6%      | <0.001  | 0.034  |       |
| 2     |        |                                           | 21,672        | 67.2%      |         |        |       |
| 1     | 1002-5 | American Indian or Alaska Native          | 98            | 0.3%       | 1       | <0.001 |       |
| 2     |        |                                           | 98            | 0.3%       |         |        |       |
| 1     | UNK    | Unknown Race                              | 4,252         | 13.2%      | 0.057   | 0.015  |       |
| 2     |        |                                           | 4,090         | 12.7%      |         |        |       |
| 1     | F      | Female                                    | 17,214        | 53.4%      | 0.215   | 0.010  |       |
| 2     |        |                                           | 17,371        | 53.9%      |         |        |       |
| 1     | 2076-8 | Native Hawaiian or Other Pacific Islander | 172           | 0.5%       | 0.101   | 0.013  |       |
| 2     |        |                                           | 143           | 0.4%       |         |        |       |
| 1     | UN     | Unknown Gender                            | 1,652         | 5.1%       | 0.695   | 0.003  |       |
| 2     |        |                                           | 1,674         | 5.2%       |         |        |       |
| 1     | 2186-5 | Not Hispanic or Latino                    | 22,221        | 68.9%      | 0.001   | 0.025  |       |
| 2     |        |                                           | 22,596        | 70.1%      |         |        |       |
| 1     | 2135-2 | Hispanic or Latino                        | 2,652         | 8.2%       | 0.005   | 0.022  |       |
| 2     |        |                                           | 2,460         | 7.6%       |         |        |       |
| 1     | 2054-5 | Black or African American                 | 5,095         | 15.8%      | 0.016   | 0.019  |       |
| 2     |        |                                           | 4,873         | 15.1%      |         |        |       |
| 1     | M      | Male                                      | 13,390        | 41.5%      | 0.152   | 0.011  |       |
| 2     |        |                                           | 13,211        | 41.0%      |         |        |       |
| 1     | 2028-9 | Asian                                     | 681           | 2.1%       | 0.210   | 0.010  |       |
| 2     |        |                                           | 636           | 2.0%       |         |        |       |

**Diagnosis**

| Group |      | Mean ± SD                     | Patients | % of Group | P-Value | SMD   |
|-------|------|-------------------------------|----------|------------|---------|-------|
| 1     | Z55- | Persons with potential health | 419      | 1.3%       | 0.002   | 0.025 |
| 2     | Z65  |                               | 333      | 1.0%       |         |       |

|   |        | hazards related to socioeconomic and psychosocial circumstances |        |       |        |       |
|---|--------|-----------------------------------------------------------------|--------|-------|--------|-------|
| 1 | E66    | Overweight and obesity                                          | 11,336 | 35.1% | 0.668  | 0.003 |
| 2 |        |                                                                 | 11,284 | 35.0% |        |       |
| 1 | Z68.3  | Body mass index [BMI] 30-39, adult                              | 3,244  | 10.1% | 0.263  | 0.009 |
| 2 |        |                                                                 | 3,159  | 9.8%  |        |       |
| 1 | Z68.4  | Body mass index [BMI] 40 or greater, adult                      | 2,968  | 9.2%  | 0.311  | 0.008 |
| 2 |        |                                                                 | 2,894  | 9.0%  |        |       |
| 1 | Z68.25 | Body mass index [BMI] 25.0-25.9, adult                          | 119    | 0.4%  | 0.017  | 0.019 |
| 2 |        |                                                                 | 85     | 0.3%  |        |       |
| 1 | Z68.26 | Body mass index [BMI] 26.0-26.9, adult                          | 150    | 0.5%  | 0.002  | 0.024 |
| 2 |        |                                                                 | 101    | 0.3%  |        |       |
| 1 | Z68.27 | Body mass index [BMI] 27.0-27.9, adult                          | 208    | 0.6%  | 0.016  | 0.019 |
| 2 |        |                                                                 | 162    | 0.5%  |        |       |
| 1 | Z68.28 | Body mass index [BMI] 28.0-28.9, adult                          | 262    | 0.8%  | 0.044  | 0.016 |
| 2 |        |                                                                 | 218    | 0.7%  |        |       |
| 1 | Z68.29 | Body mass index [BMI] 29.0-29.9, adult                          | 297    | 0.9%  | 0.237  | 0.009 |
| 2 |        |                                                                 | 269    | 0.8%  |        |       |
| 1 | Z80    | Family history of primary malignant neoplasm                    | 1,203  | 3.7%  | 0.083  | 0.014 |
| 2 |        |                                                                 | 1,121  | 3.5%  |        |       |
| 1 | Z15.0  | Genetic susceptibility to malignant neoplasm                    | 18     | 0.1%  | 0.194  | 0.010 |
| 2 |        |                                                                 | 11     | 0.0%  |        |       |
| 1 | Z12    | Encounter for screening for malignant neoplasms                 | 6,176  | 19.1% | <0.001 | 0.043 |
| 2 |        |                                                                 | 5,635  | 17.5% |        |       |
| 1 | Z85    | Personal history of malignant neoplasm                          | 1,107  | 3.4%  | 0.040  | 0.016 |
| 2 |        |                                                                 | 1,014  | 3.1%  |        |       |
| 1 | Z98.84 | Bariatric surgery status                                        | 517    | 1.6%  | 0.457  | 0.006 |
| 2 |        |                                                                 | 541    | 1.7%  |        |       |
| 1 | E66.0  | Obesity due to excess calories                                  | 5,848  | 18.1% | 0.706  | 0.003 |
| 2 |        |                                                                 | 5,885  | 18.2% |        |       |

|   |       |                                                                                            |       |       |       |        |
|---|-------|--------------------------------------------------------------------------------------------|-------|-------|-------|--------|
| 1 | E66.2 | Morbid (severe) obesity with alveolar hypoventilation                                      | 227   | 0.7%  | 0.503 | 0.005  |
| 2 |       |                                                                                            | 213   | 0.7%  |       |        |
| 1 | E66.3 | Overweight                                                                                 | 531   | 1.6%  | 0.038 | 0.016  |
| 2 |       |                                                                                            | 466   | 1.4%  |       |        |
| 1 | E66.8 | Other obesity                                                                              | 190   | 0.6%  | 0.096 | 0.013  |
| 2 |       |                                                                                            | 159   | 0.5%  |       |        |
| 1 | E66.9 | Obesity, unspecified                                                                       | 8,093 | 25.1% | 0.598 | 0.004  |
| 2 |       |                                                                                            | 8,035 | 24.9% |       |        |
| 1 | Z80.7 | Family history of other malignant neoplasms of lymphoid, hematopoietic and related tissues | 15    | 0.0%  | 0.857 | 0.001  |
| 2 |       |                                                                                            | 16    | 0.0%  |       |        |
| 1 | D47.2 | Monoclonal gammopathy                                                                      | 110   | 0.3%  | 0.582 | 0.004  |
| 2 |       |                                                                                            | 102   | 0.3%  |       |        |
| 1 | C90.3 | Solitary plasmacytoma                                                                      | 10    | 0.0%  | 1     | <0.001 |
| 2 |       |                                                                                            | 10    | 0.0%  |       |        |
| 1 | D45   | Polycythemia vera                                                                          | 64    | 0.2%  | 0.357 | 0.007  |
| 2 |       |                                                                                            | 54    | 0.2%  |       |        |
| 1 | D46   | Myelodysplastic syndromes                                                                  | 31    | 0.1%  | 0.090 | 0.013  |
| 2 |       |                                                                                            | 19    | 0.1%  |       |        |
| 1 | D47   | Other neoplasms of uncertain behavior of lymphoid, hematopoietic and related tissue        | 233   | 0.7%  | 0.123 | 0.012  |
| 2 |       |                                                                                            | 201   | 0.6%  |       |        |

### Medication

| Group  | Mean ± SD | Patients                                  | % of Group       | P-Value        | SMD   |        |
|--------|-----------|-------------------------------------------|------------------|----------------|-------|--------|
| 1<br>2 | A10A      | INSULINS AND ANALOGUES                    | 14,032<br>13,985 | 43.5%<br>43.4% | 0.709 | 0.003  |
| 1<br>2 | A10B<br>B | Sulfonylureas                             | 5,412<br>5,332   | 16.8%<br>16.5% | 0.398 | 0.007  |
| 1<br>2 | A10B<br>F | Alpha glucosidase inhibitors              | 121<br>121       | 0.4%<br>0.4%   | 1     | <0.001 |
| 1<br>2 | A10B<br>G | Thiazolidinediones                        | 1,930<br>1,898   | 6.0%<br>5.9%   | 0.594 | 0.004  |
| 1<br>2 | A10B<br>H | Dipeptidyl peptidase 4 (DPP-4) inhibitors | 3,465<br>3,454   | 10.7%<br>10.7% | 0.889 | 0.001  |

|   |      |                                                    |       |      |       |       |
|---|------|----------------------------------------------------|-------|------|-------|-------|
| 1 | A10B | Sodium-glucose co-transporter 2 (SGLT2) inhibitors | 1,742 | 5.4% | 0.052 | 0.015 |
| 2 | K    |                                                    | 1,632 | 5.1% |       |       |
| 1 | A10B | Other blood glucose lowering drugs, excl. insulins | 654   | 2.0% | 0.911 | 0.001 |
| 2 | X    |                                                    | 650   | 2.0% |       |       |
